# Supplementary material for: Identification of Nuclear Protein Targets for Six Leukemogenic Tyrosine Kinases Governed by Post-Translational Regulation
Source: PubMed Central journal article supplement (PMC3382166; doi:10.1371/journal.pone.0038928), 2012-06-22

# Supplementary Figure 1

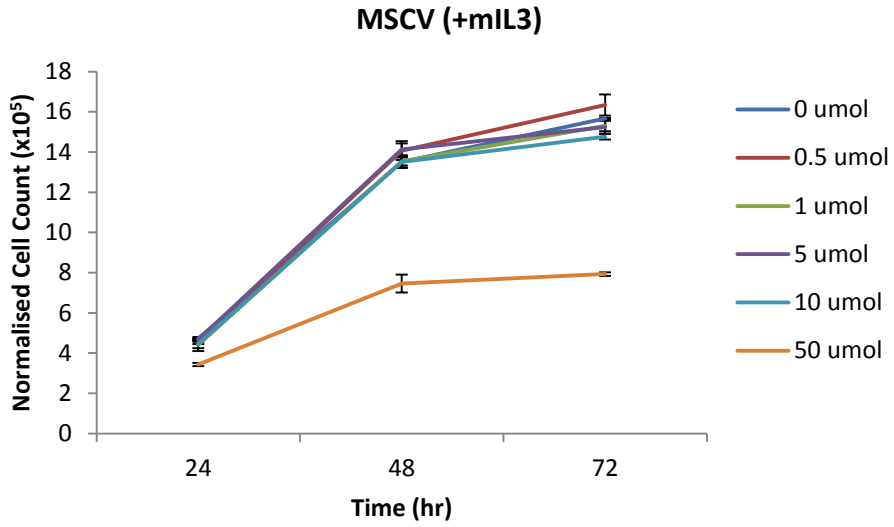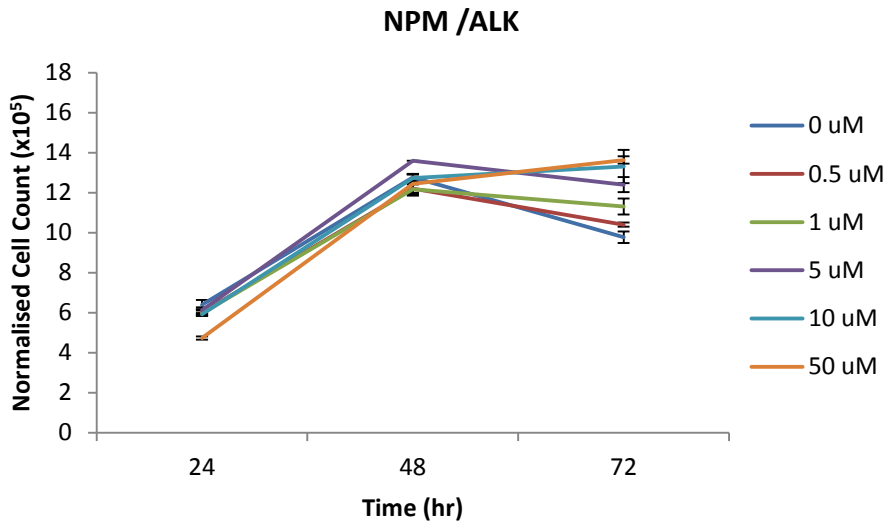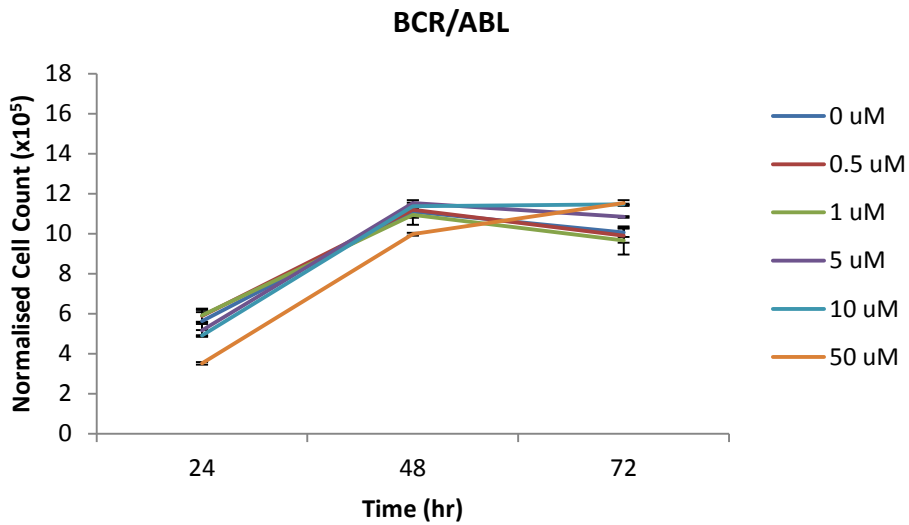

### TEL /PDGFRB

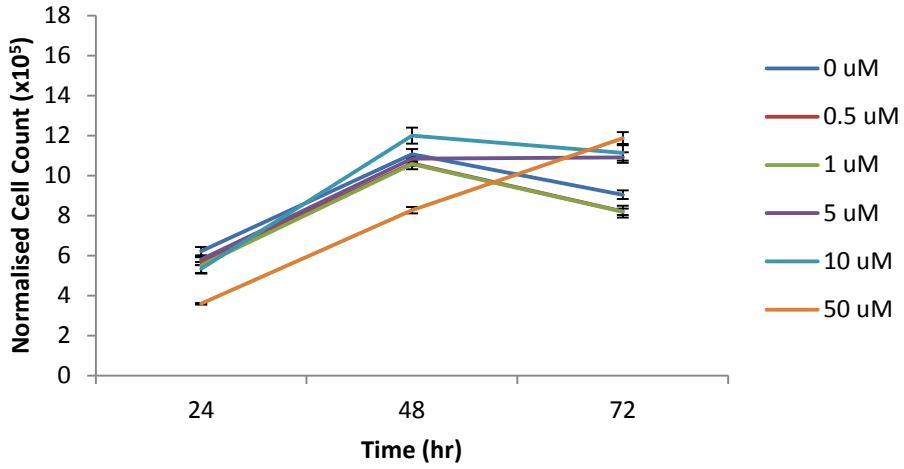

### FLT3 ITD

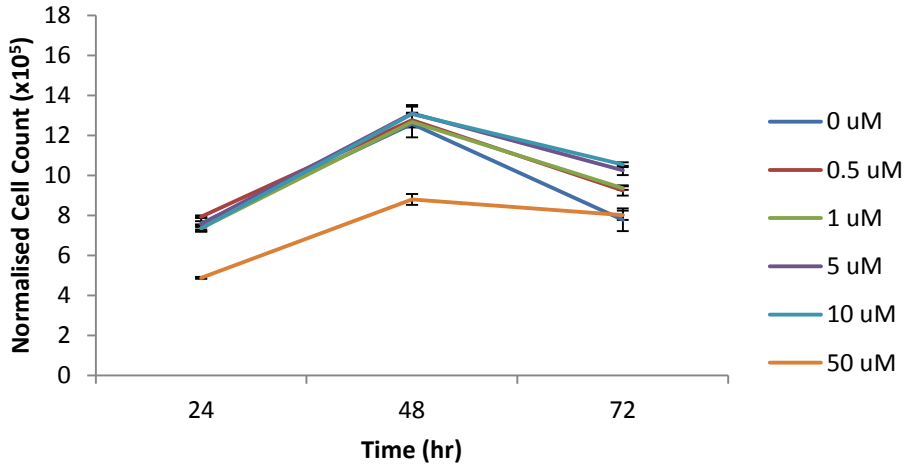

### KIT mutant

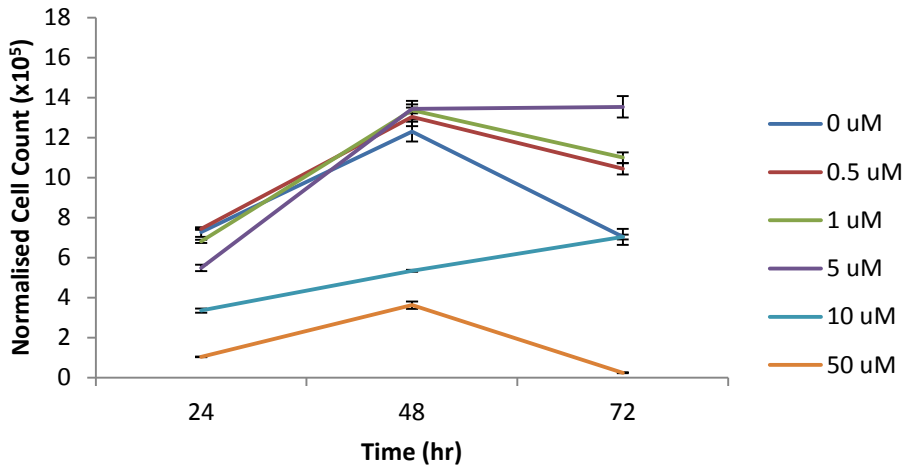

### FIP1/PDGF $\alpha$

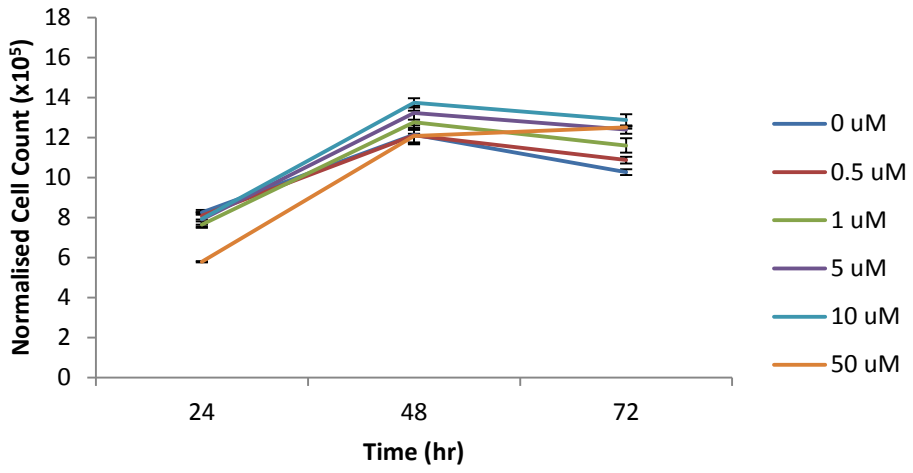

Supplement: pone.0038928.s001.pdf [file pone.0038928.s001.pdf]
