# Supplementary material for: Identification of Nuclear Protein Targets for Six Leukemogenic Tyrosine Kinases Governed by Post-Translational Regulation
Source: PLoS One. 2012 Jun 22;7(6):e38928. doi: 10.1371/journal.pone.0038928 (PMC3382166; doi:10.1371/journal.pone.0038928)
Supplement: Table S1 — All proteins identified. Table showing all 3763 nuclear proteins identified across the three replicate experiments of Ba/F3 cells transfected with 6 oncogenic PTKs. The first four columns display protein and gene accessions, gene symbol and name. The next nine columns give information from the search results for the identification of the protein in each experiment (blanks if not identified). “Coverage” indicates what percentage of the protein sequence was identified. “Unique peptides” indicates the number of unique peptides discovered whilst “Peptides used” indicates the number of unique peptides used to derive the quantification. The remaining columns give, for each oncogene in turn, quantification ratios (against MSCV control) and associated p-values and error factors for each replicate. (XLSX) [file pone.0038928.s002.xlsx]

## Sheet: proteinquantpivot
Accession	Gene	Gene Symbol	Name	Run 1 Coverage	Run 1 Unique peptides	Run 1 Peptides used	Run 2 Coverage	Run 2 Unique peptides	Run 2 Peptides used	Run 3 Coverage	Run 3 Unique peptides	Run 3 Peptides used	BCR/ABL Run 1 Ratio	BCR/ABL Run 1 P-val	BCR/ABL Run 1 EF	BCR/ABL Run 2 Ratio	BCR/ABL Run 2 P-val	BCR/ABL Run 2 EF	BCR/ABL Run 3 Ratio	BCR/ABL Run 3 P-val	BCR/ABL Run 3 EF	TEL/PDGFRb Run 1 Ratio	TEL/PDGFRb Run 1 P-val	TEL/PDGFRb Run 1 EF	TEL/PDGFRb Run 2 Ratio	TEL/PDGFRb Run 2 P-val	TEL/PDGFRb Run 2 EF	TEL/PDGFRb Run 3 Ratio	TEL/PDGFRb Run 3 P-val	TEL/PDGFRb Run 3 EF	NPM/ALK Run 1 Ratio	NPM/ALK Run 1 P-val	NPM/ALK Run 1 EF	NPM/ALK Run 2 Ratio	NPM/ALK Run 2 P-val	NPM/ALK Run 2 EF	NPM/ALK Run 3 Ratio	NPM/ALK Run 3 P-val	NPM/ALK Run 3 EF	KIT D816V Run 1 Ratio	KIT D816V Run 1 P-val	KIT D816V Run 1 EF	KIT D816V Run 2 Ratio	KIT D816V Run 2 P-val	KIT D816V Run 2 EF	KIT D816V Run 3 Ratio	KIT D816V Run 3 P-val	KIT D816V Run 3 EF	Flt3-ITD Run 1 Ratio
ENSMUSP00000072478	ENSMUSG00000022565	Plec	Q9QXS1 "Plectin-1 (Plectin-6)(PLTN)(PCN)"	0.4842	411	101	0.4215	272	130				0.705711	6.50164e-13	1.08728	0.740298	1.22096e-28	1.04167				0.855051	0.00033055	1.08713	1.02635	0.00313439	1.01707				1.02294	0.688931	1.1186	0.977365	0.275279	1.04181				1.074	0.108511	1.09139	0.812039	2.95351e-25	1.03178				1.17948
ENSMUSP00000016771	ENSMUSG00000022443	Myh9	Q8VDD5 "Myosin-9 (Myosin heavy chain 9)(Myosin heavy chain, non-muscle IIa)(Non-muscle myosin heavy chain IIa)(NMMHC II-a)(NMMHC-IIA)(Cellular myosin heavy chain, type A)(Non-muscle myosin heavy chain A)(NMMHC-A)"	0.6199	286	67	0.6112	268	90	0.8224	375	83	0.694293	0.00177095	1.25057	0.753269	0.000184084	1.15515	0.901327	1.51159e-10	1.02862	1.10082	0.455822	1.29137	0.570032	1.10073e-33	1.05933	1.09831	0.00406007	1.06511	0.400199	1.19947e-10	1.26988	0.701832	7.92475e-21	1.05904	1.09802	0.512886	1.32709	0.900025	0.408431	1.28767	1.00661	0.920693	1.14021	0.927807	0.322196	1.16142	0.974353
ENSMUSP00000018851	ENSMUSG00000018707	Dync1h1	Q9JHU4 "Cytoplasmic dynein 1 heavy chain 1 (Cytoplasmic dynein heavy chain 1)(Dynein heavy chain, cytosolic)"	0.3534	365	79	0.3432	216	96	0.5166	423	78	0.829501	2.57444e-06	1.07611	0.949953	0.0498287	1.05263	0.877498	9.13104e-18	1.02358	1.23139	3.28783e-07	1.07703	1.09722	3.40421e-08	1.03111	1.09338	1.23966e-09	1.02606	0.793226	8.58923e-06	1.10163	0.95414	0.0167402	1.039	1.06287	0.188473	1.09581	1.0209	0.613446	1.08459	1.02794	0.189438	1.04225	0.900146	4.00056e-06	1.04307	1.05407
ENSMUSP00000033310	ENSMUSG00000031004	Mki67	Q61769;Q7TSF6 "Ki-67 protein ";"Mki67 protein "	0.3956	196	67	0.4532	168	74	0.5032	208	52	0.995676	0.912775	1.08188	0.992349	0.855715	1.0875	0.96892	0.00104543	1.0184	0.828413	5.94576e-05	1.09156	0.841478	5.96143e-07	1.06488	0.776131	2.62736e-12	1.05733	0.761732	8.54781e-06	1.11917	0.727418	3.83165e-22	1.04681	0.835658	0.0364751	1.18273	0.880098	0.00528491	1.09244	0.90463	0.0055457	1.07238	0.819679	1.34117e-07	1.06744	0.859086
ENSMUSP00000109346	ENSMUSG00000057738	Spna2	A3KGU5;B7ZWK3;Q3TNY2;Q3TYI8;Q3URW8;Q3V1V5;Q58ES7;Q6PA04 "Spectrin alpha 2 ";"Spna2 protein ";"Putative uncharacterized protein Fragment ";"Putative uncharacterized protein Fragment ";"Putative uncharacterized protein Fragment ";"Putative uncharacterized protein Fragment ";"Spna2 protein Fragment ";"Spna2 protein Fragment "	0.4954	256	63	0.4177	149	69	0.5351	225	45	0.924197	0.00481752	1.05537	1.13055	0.000702645	1.07138	0.770297	6.1706e-23	1.02789	0.64889	1.86948e-19	1.06844	0.767435	1.90452e-18	1.045	0.786247	4.67944e-21	1.02874	0.703742	1.54517e-06	1.14084	0.754006	2.33684e-14	1.06014	0.823636	0.0105577	1.15762	0.784139	5.72587e-10	1.06855	0.756221	1.90831e-15	1.05585	0.769033	1.74738e-07	1.08919	0.676225
ENSMUSP00000068896	ENSMUSG00000020914	Top2a	Q01320 "DNA topoisomerase 2-alpha (EC 5.99.1.3)(DNA topoisomerase II, alpha isozyme)"	0.4568	151	37	0.5203	148	42	0.7225	254	39	0.769898	0.0118707	1.22123	0.692837	0.00721179	1.29966	0.784539	2.69805e-09	1.06527	0.700954	0.00299039	1.25329	0.711536	6.31503e-10	1.08955	0.657433	1.19291e-12	1.08429	0.86319	0.220771	1.27081	0.782917	8.60099e-05	1.12013	0.782671	0.334785	1.6625	0.744702	0.0114058	1.25096	0.785892	0.0540604	1.27813	0.746492	0.2104	1.59158	0.945196
ENSMUSP00000099568	ENSMUSG00000020850	Prpf8	Q99PV0 "Pre-mRNA-processing-splicing factor 8 (Splicing factor Prp8)"	0.3683	201	46	0.3109	111	47	0.5666	220	45	0.996255	0.954951	1.14226	0.878934	0.00166013	1.08083	0.958765	0.004558	1.02879	0.964183	0.576906	1.13964	1.03321	0.133497	1.044	0.939166	0.00495492	1.04367	1.03792	0.622477	1.16323	0.998614	0.962226	1.0604	1.02934	0.771776	1.221	0.955313	0.489855	1.14138	0.888205	0.00144327	1.07293	0.922442	0.100296	1.10175	1.01625
ENSMUSP00000112606	ENSMUSG00000006005	Tpr	Q05CS8;Q32P08;Q3TZB5;Q3UVR0;Q3V1L5;Q7M739;Q8BIX0;Q8BK71;Q8BU18;Q8R4A0;Q91ZA5;Q921B9 "Tpr protein Fragment ";"Tpr protein Fragment ";"Putative uncharacterized protein Fragment ";"Putative uncharacterized protein Fragment ";"Putative uncharacterized protein Fragment ";"Nuclear pore complex-associated intranuclear coiled-coil protein TPRTranslocated promoter regionTranslocated promoter region, isofo…	0.3886	176	47	0.3755	142	55	0.496	190	27	1.12269	0.0579429	1.12727	0.98563	0.755931	1.09735	1.05543	0.0444802	1.05393	0.948535	0.385445	1.12909	0.987704	0.760137	1.0842	0.972819	0.212785	1.04536	1.0941	0.264308	1.17374	0.980561	0.63999	1.08728	1.32953	0.00073587	1.16542	1.0807	0.233371	1.13811	0.936958	0.12269	1.08682	1.12302	0.00342582	1.07689	1.11906
ENSMUSP00000108011	ENSMUSG00000063870	Chd4	Q3U582;Q3UFM8;Q3ULG0;Q3V265;Q3V3I7;Q6IQY9;Q99JM0;Q9CTT2 "Putative uncharacterized protein Fragment ";"Putative uncharacterized protein ";"Putative uncharacterized protein Fragment ";"Putative uncharacterized protein Fragment ";"Putative uncharacterized protein Fragment ";"Chd4 protein ";"Chd4 protein Fragment ";"Putative uncharacterized protein Fragment "	0.4214	186	37	0.3465	115	27	0.6327	216	30	0.928148	0.511346	1.25644	0.938625	0.594124	1.273	0.997226	0.86821	1.03452	1.00056	0.996435	1.29065	0.999771	0.990261	1.03894	0.986379	0.613953	1.05654	0.961136	0.755621	1.29268	0.939609	0.215488	1.10614	0.906801	0.651561	1.55029	0.944088	0.640769	1.28186	0.975656	0.819292	1.24553	0.925649	0.562422	1.30948	1.02946
ENSMUSP00000121835	ENSMUSG00000024054	Smchd1	NP_083163.3 "structural maintenance of chromosomes flexible hinge domain-containing protein 1 "	0.3886	169	46	0.3961	112	53	0.4888	148	34	0.945135	0.267157	1.10644	0.918725	0.00132753	1.05141	0.912626	0.000685313	1.05091	0.951603	0.351017	1.11184	1.02838	0.0107237	1.02145	1.01704	0.455891	1.04662	0.836002	0.00825434	1.13944	0.86905	2.37134e-07	1.04854	0.937065	0.535657	1.23532	0.918309	0.114976	1.11269	0.956208	0.0183834	1.03761	0.966717	0.512774	1.10972	1.02306
ENSMUSP00000099509	ENSMUSG00000003660	Snrnp200	Q69ZZ3;Q6P4T2;Q7TMG2 "MKIAA0788 protein Fragment ";"Activating signal cointegrator 1 complex subunit 3-like 1Small nuclear ribonucleoprotein 200 (U5) ;";"Snrnp200 protein Fragment "	0.3979	158	47	0.4321	134	69	0.5599	202	50	0.911642	0.0436443	1.09388	0.853457	2.57562e-05	1.07247	0.963524	0.00378325	1.02487	0.886501	0.00766848	1.09075	1.04286	0.0115583	1.03278	0.938662	0.00335987	1.04213	0.943103	0.327638	1.12664	0.937533	0.0280002	1.059	1.09078	0.418517	1.2387	0.872586	0.00722869	1.1024	0.878257	1.44533e-05	1.05694	0.911412	0.0504041	1.09741	0.927315
ENSMUSP00000011877	ENSMUSG00000020315	Spnb2	Q62261 "Spectrin beta chain, brain 1 (Spectrin, non-erythroid beta chain 1)(Beta-II spectrin)(Fodrin beta chain)(Embryonic liver fodrin)"	0.4012	196	41	0.4262	144	62	0.526	229	49	0.980733	0.67404	1.09732	1.1585	1.87955e-05	1.06544	0.80728	3.20764e-23	1.02389	0.677752	4.57339e-07	1.1385	0.760839	1.08237e-22	1.03613	0.813856	2.02056e-16	1.03431	0.747402	0.000121652	1.14796	0.806048	2.91112e-10	1.05899	0.875446	0.0144911	1.11121	0.787954	0.000926428	1.14395	0.750686	1.23606e-13	1.06225	0.812713	3.78083e-11	1.05023	0.681744
ENSMUSP00000027438	ENSMUSG00000026234	Ncl	P09405 "Nucleolin (Protein C23)"	0.6322	117	40	0.6011	127	40	0.7044	121	29	1.20297	0.17662	1.31214	1.14853	0.453896	1.44819	1.13	0.0419209	1.12458	0.841172	0.289177	1.38495	0.988601	0.709001	1.06363	0.851327	0.000274057	1.08249	1.33158	0.106407	1.41973	1.06384	0.294184	1.12496	0.910523	0.582531	1.41299	1.22849	0.235282	1.41251	1.15448	0.357588	1.36637	1.15863	0.406067	1.4297	1.17576
ENSMUSP00000044827	ENSMUSG00000040463	Mybbp1a	Q7TPV4 "Myb-binding protein 1A (Myb-binding protein of 160 kDa)"	0.4926	184	42	0.5595	152	45	0.7969	286	49	0.889147	0.414419	1.33356	0.91537	0.529037	1.32421	1.06903	0.0877324	1.08006	0.858124	0.308124	1.34925	0.892191	0.00322467	1.07656	0.887899	0.0211545	1.10552	0.893508	0.407815	1.31262	0.879119	0.0518651	1.13871	1.37898	0.515255	2.67995	0.912071	0.579157	1.39452	0.898106	0.376264	1.27413	0.974557	0.921231	1.68439	0.976002
ENSMUSP00000081912	ENSMUSG00000066306	Numa1	Q3TH77;Q3UNM2;Q80Y35;Q91W16;Q99KG8 "Putative uncharacterized protein ";"Putative uncharacterized protein Fragment ";"Nuclear mitotic apparatus protein 1 ";"Numa1 protein ";"Numa1 protein Fragment "	0.415	165	44	0.4121	131	52	0.5602	195	37	0.86627	0.0152441	1.12138	0.869727	0.000914813	1.08285	0.868163	7.92042e-08	1.04366	0.873172	0.0319455	1.13131	0.954529	0.000421846	1.02508	0.917152	2.20465e-05	1.03664	0.828929	0.00787785	1.14531	0.873756	4.61918e-10	1.03592	1.00129	0.983302	1.13158	0.791427	0.000869208	1.1407	0.798327	3.14049e-08	1.07185	0.844975	6.57357e-05	1.07862	0.980701
ENSMUSP00000038135	ENSMUSG00000042699	Dhx9	O70133 "ATP-dependent RNA helicase A (EC 3.6.1.-)(Nuclear DNA helicase II)(NDH II)(DEAH box protein 9)(mHEL-5)"	0.4581	140	40	0.5289	115	37	0.7038	209	40	0.881717	0.0640187	1.14294	0.855253	0.0868066	1.19735	0.994247	0.826888	1.05445	0.947531	0.403762	1.13788	1.0059	0.929705	1.14374	0.961759	0.290545	1.0764	0.933956	0.503571	1.2272	0.929484	0.454346	1.2166	0.907558	0.424941	1.27559	0.956865	0.561168	1.16438	0.931748	0.367177	1.16997	0.969005	0.578696	1.12047	0.92615
ENSMUSP00000072008	ENSMUSG00000025047	Pdcd11	Q6NS46 "Protein RRP5 homolog (Programmed cell death protein 11)(Apoptosis-linked gene 4 protein)"	0.3926	152	38	0.3679	101	39	0.5478	174	32	0.926447	0.379312	1.18999	0.952601	0.538029	1.17135	0.820669	1.24821e-07	1.06098	0.892094	0.219757	1.2036	0.943323	0.00235701	1.03689	0.773742	1.10437e-09	1.06294	0.999929	1	1.24111	0.955705	0.0809825	1.05248	1.00538	0.972136	1.36469	0.98068	0.83488	1.20718	1.01406	0.833808	1.14312	0.92432	0.450874	1.23398	1.14981
ENSMUSP00000042691	ENSMUSG00000020075	Ddx21	Q9JIK5 "Nucleolar RNA helicase 2 (EC 3.6.1.-)(Nucleolar RNA helicase II)(Nucleolar RNA helicase Gu)(RH II/Gu)(Gu-alpha)(DEAD box protein 21)"	0.5699	124	29	0.6298	100	33	0.8014	148	36	1.05162	0.531277	1.17658	1.18213	0.0808195	1.20808	1.21197	1.15266e-10	1.04418	0.905471	0.347628	1.23725	1.03586	0.386086	1.08511	1.11995	0.110806	1.15093	0.889713	0.266128	1.23481	0.996206	0.945855	1.11977	1.06983	0.671137	1.37714	0.990451	0.914426	1.1987	1.14793	0.115767	1.18986	1.10099	0.247511	1.18065	1.12108
ENSMUSP00000025930	ENSMUSG00000024974	Smc3	Q9CW03 "Structural maintenance of chromosomes protein 3 (SMC protein 3)(SMC-3)(Chondroitin sulfate proteoglycan 6)(Chromosome segregation protein SmcD)(Basement membrane-associated chondroitin proteoglycan)(Bamacan)(Mad member-interacting protein 1)"	0.5596	156	44	0.5177	104	47	0.6401	131	31	0.835143	0.0406704	1.18788	0.784824	0.00103294	1.14935	0.761779	4.87541e-15	1.03925	0.872439	0.120648	1.18985	0.886756	1.06016e-06	1.04397	0.894636	0.00261994	1.07173	0.862602	0.122209	1.20814	0.809104	6.06505e-06	1.08702	0.838122	0.0999374	1.23667	0.881444	0.18355	1.20721	0.860224	0.0188652	1.13259	0.832918	1.26387e-05	1.07419	0.981534
ENSMUSP00000021062	ENSMUSG00000020719	Ddx5	Q61656 "Probable ATP-dependent RNA helicase DDX5 (EC 3.6.1.-)(DEAD box protein 5)(RNA helicase p68)(DEAD box RNA helicase DEAD1)(mDEAD1)"	0.6667	106	21	0.5398	72	17	0.8065	131	19	0.940085	0.449472	1.18184	0.939543	0.543143	1.23712	1.13738	0.0168859	1.10818	1.10409	0.394541	1.26857	1.09013	0.0032751	1.05442	1.0339	0.394315	1.08357	1.10242	0.317935	1.22015	1.00961	0.855248	1.11556	1.50589	0.0499669	1.50581	0.930891	0.489804	1.23717	0.953994	0.594522	1.20182	1.12666	0.260338	1.24059	1.07938
ENSMUSP00000015800	ENSMUSG00000015656	Hspa8	P63017 "Heat shock cognate 71 kDa protein (Heat shock 70 kDa protein 8)"	0.6749	102	31	0.63	102	25	0.8065	121	22	1.07605	0.73245	1.54381	1.07572	0.559795	1.29014	1.13925	1.97639e-05	1.05079	1.10256	0.623639	1.49562	0.939298	0.100036	1.07848	1.0236	0.516072	1.07621	1.10016	0.65717	1.54466	1.03785	0.484214	1.11395	1.14213	0.729821	2.20288	1.1338	0.560875	1.54728	1.12852	0.300284	1.26582	1.14844	0.608268	1.73894	1.19511
ENSMUSP00000109938	ENSMUSG00000031328	Flna	B7FAU9;B9EKP5;Q3U7N9;Q4FZG4;Q6KAM8;Q9JJ37 "Filamin, alpha ";"Filamin, alphaMCG21234, isoform CRA_b ;";"Putative uncharacterized protein Fragment ";"Flna protein Fragment ";"MFLJ00343 protein Fragment ";"Filamin Fragment "	0.3092	121	37	0.2819	92	38	0.5142	192	47	1.90736	4.4058e-09	1.18152	2.15946	5.84148e-18	1.10432	0.785062	1.87206e-15	1.04232	1.52126	0.000107092	1.2142	0.941356	0.000950395	1.03468	1.21333	1.48108e-06	1.07299	1.34002	0.00222341	1.1967	1.43259	7.70768e-16	1.05556	1.15852	0.109709	1.19914	2.86127	3.5513e-12	1.22327	2.24745	1.25164e-19	1.09726	1.23381	1.58747e-07	1.0709	1.45747
ENSMUSP00000044645	ENSMUSG00000041133	Smc1a	Q9CU62 "Structural maintenance of chromosomes protein 1A (SMC protein 1A)(SMC-1A)(SMC-1-alpha)(Chromosome segregation protein SmcB)(Sb1.8)"	0.485	132	38	0.485	97	44	0.5977	126	30	0.814219	0.0490912	1.22709	0.772038	6.85504e-08	1.0836	0.790654	8.62432e-16	1.03086	0.855724	0.156365	1.24381	0.872713	9.48881e-11	1.03285	0.895094	0.000178104	1.05417	0.853545	0.141649	1.23818	0.805796	5.88461e-13	1.04395	0.795663	0.039781	1.2425	0.863506	0.160586	1.23079	0.815498	2.14254e-06	1.0781	0.831424	0.000680042	1.10435	0.962421
ENSMUSP00000027127	ENSMUSG00000025982	Sf3b1	Q99NB9 "Splicing factor 3B subunit 1 (Pre-mRNA-splicing factor SF3b 155 kDa subunit)(SF3b155)(Spliceosome-associated protein 155)(SAP 155)"	0.4762	113	35	0.4463	74	34	0.6419	130	33	0.911067	0.329182	1.21091	0.902686	0.167773	1.15919	1.00127	0.937234	1.03302	0.84789	0.130942	1.24208	1.00337	0.900985	1.05617	0.945683	0.0475886	1.05677	0.944623	0.605972	1.24932	0.993538	0.888866	1.09821	0.901637	0.518096	1.38091	0.92041	0.470022	1.25977	0.889437	0.0729355	1.13737	0.86625	0.0578551	1.16028	0.958123
ENSMUSP00000003310	ENSMUSG00000003226	Ranbp2	Q9ERU9 "E3 SUMO-protein ligase RanBP2 (Ran-binding protein 2)(RanBP2)"	0.2827	174	38	0.21	83	30	0.3472	160	27	1.06815	0.189592	1.10518	1.08779	0.213152	1.14474	1.08385	0.0561124	1.08632	0.957277	0.410121	1.1121	1.0145	0.358482	1.03205	0.989228	0.635466	1.04752	0.979908	0.71837	1.1199	0.982656	0.457005	1.04861	0.968605	0.76807	1.24618	0.915717	0.0584295	1.09566	0.91499	0.0753571	1.10352	0.888252	0.00642811	1.08568	1.0156
ENSMUSP00000084864	ENSMUSG00000059208	Hnrnpm	Q9D0E1 "Heterogeneous nuclear ribonucleoprotein M (hnRNP M)"	0.6845	126	29	0.7394	130	34				1.03047	0.71645	1.18237	0.928234	0.542835	1.27949				0.987325	0.894577	1.21574	0.994663	0.881443	1.07515				1.02094	0.814207	1.19595	0.933899	0.11653	1.09018				0.991192	0.926656	1.2154	0.858352	0.147765	1.23331				0.964405
ENSMUSP00000030623	ENSMUSG00000028820	Sfpq	Q8VIJ6 "Splicing factor, proline- and glutamine-rich (Polypyrimidine tract-binding protein-associated-splicing factor)(PTB-associated-splicing factor)(PSF)(DNA-binding p52/p100 complex, 100 kDa subunit)"	0.5837	101	28	0.5422	94	23	0.6838	127	17	1.10985	0.612395	1.5196	1.18352	0.180931	1.28776	1.20728	0.020238	1.16757	1.10295	0.652236	1.55667	1.02954	0.560251	1.10748	1.01095	0.852982	1.13043	1.09407	0.661142	1.51905	1.03686	0.502912	1.11651	1.6903	0.357018	3.23268	1.12977	0.550234	1.51444	1.02811	0.790775	1.23876	1.13285	0.685638	1.89928	1.09765
ENSMUSP00000097294	ENSMUSG00000075031	Hist1h2bb	Q64475 "Histone H2B type 1-B (h2B-143)"	0.9603	204	4				0.9524	185	3	1.00029	0.998645	1.65416				1.1499	0.197354	1.37136	1.07858	0.641828	1.5952				1.18445	0.170927	1.41532	0.993685	0.985012	2.68715				1.08897	0.789494	3.33452	1.08014	0.729041	1.90593				0.960356	0.768139	1.67594	1.17721
ENSMUSP00000044361	ENSMUSG00000031715	Smarca5	Q91ZW3 "SWI/SNF-related matrix-associated actin-dependent regulator of chromatin subfamily A member 5 (EC 3.6.1.-)(Sucrose nonfermenting protein 2 homolog)(mSnf2h)"	0.4824	115	35	0.4396	96	36	0.6223	129	26	1.06478	0.364803	1.14897	1.05356	0.487684	1.163	1.0729	5.96141e-05	1.03054	1.06213	0.39764	1.15369	1.03591	0.018031	1.02928	0.968453	0.0780871	1.03659	1.02796	0.728702	1.17377	1.01657	0.55257	1.05722	1.10888	0.7232	1.81187	0.97622	0.749044	1.16375	1.00347	0.957329	1.13916	1.00109	0.994718	1.40008	1.23545
ENSMUSP00000110103	ENSMUSG00000004980	Hnrnpa2b1	O88569 "Heterogeneous nuclear ribonucleoproteins A2/B1 (hnRNP A2/B1)"	0.7743	119	1	0.7136	132	1	0.7743	117	1	1.03469			0.99702			0.938621			0.902053			1.07164			0.945085			1.1468			1.16397			0.863143			1.03832			0.97023			0.819041			1.001
ENSMUSP00000047571	ENSMUSG00000039630	Hnrnpu	Q8VEK3 "Heterogeneous nuclear ribonucleoprotein U (hnRNP U)(Scaffold attachment factor A)(SAF-A)"	0.4812	119	27	0.5663	115	27	0.7588	163	27	1.07874	0.655039	1.41311	0.851736	0.554282	1.7345	1.36451	0.00015639	1.15564	0.989477	0.953844	1.4525	0.937144	0.142073	1.09216	1.16789	0.012816	1.1268	1.03726	0.839675	1.4465	0.881809	0.133573	1.18175	1.43612	0.573895	3.69377	1.13934	0.510799	1.49681	0.914815	0.687791	1.56902	1.37814	0.22649	1.70287	1.03649
ENSMUSP00000051217	ENSMUSG00000031207	Msn	Q3UF33 "Putative uncharacterized protein Fragment "	0.5823	92	20	0.4454	54	19	0.7608	104	13	0.952201	0.719214	1.32437	0.914833	0.640727	1.48289	0.841939	7.19733e-07	1.04082	1.12552	0.42302	1.35286	0.967046	0.117	1.04368	1.25582	8.06479e-06	1.06919	1.03863	0.815086	1.39732	1.08477	0.260338	1.15847	1.49582	0.365477	2.5418	0.963963	0.827706	1.4164	0.876347	0.44802	1.42978	0.888655	0.513059	1.46464	1.34925
ENSMUSP00000004202	ENSMUSG00000004099	Dnmt1	P13864 "DNA (cytosine-5)-methyltransferase 1 (Dnmt1)(Met-1)(EC 2.1.1.37)(MCMT)(DNA methyltransferase MmuI)(DNA MTase MmuI)(M.MmuI)"	0.3675	108	29	0.3891	93	40	0.5913	168	37	0.883015	0.0165386	1.10509	0.889402	0.138377	1.16967	0.925973	0.00151567	1.04648	0.932839	0.219827	1.12013	0.920163	0.0512551	1.08726	0.866022	0.000643318	1.08117	0.920042	0.378051	1.20991	0.876556	0.016077	1.11165	0.991617	0.96639	1.49529	0.937782	0.223684	1.11152	0.979254	0.759633	1.14762	0.955035	0.721843	1.29699	1.1128
ENSMUSP00000029699	ENSMUSG00000028063	Lmna	P48678 "Lamin-A/C "	0.6226	75	27	0.588	62	25	0.6827	90	24	0.671695	0.00157461	1.2609	0.662891	0.000454202	1.23255	0.686632	1.07806e-08	1.09401	0.845251	0.186805	1.29038	0.999314	0.982308	1.0653	0.958082	0.170772	1.06467	0.977682	0.899708	1.43999	0.996515	0.953604	1.13038	1.11882	0.52271	1.43028	1.09948	0.462662	1.29893	0.955494	0.633574	1.21483	0.853866	0.0185727	1.13772	1.09445
ENSMUSP00000105094	ENSMUSG00000070544	Top1	Q04750 "DNA topoisomerase 1 (EC 5.99.1.2)(DNA topoisomerase I)"	0.5476	101	28	0.4798	66	27	0.6271	94	19	1.15348	0.375884	1.38461	1.10275	0.281082	1.20043	1.23159	2.51486e-05	1.08109	0.934986	0.655636	1.35785	0.924352	0.00163029	1.04708	0.93276	0.10331	1.08896	1.34115	0.085412	1.40121	1.14307	5.41745e-06	1.04945	1.28078	0.140377	1.40087	1.20039	0.26186	1.38686	1.0823	0.368188	1.1943	1.17848	0.0692363	1.19552	1.14826
ENSMUSP00000089978	ENSMUSG00000006498	Ptbp1	Q3T984;Q3UBR5;Q8BGJ5;Q8C2R5;Q8CB58;Q8R509;Q923A7 "Putative uncharacterized protein ";"Putative uncharacterized protein ";"Putative uncharacterized proteinMCG13402, isoform CRA_a ;";"Putative uncharacterized protein ";"Putative uncharacterized proteinMCG13402, isoform CRA_d ;";"Polypirimidine tract binding protein ";"Ptbp1 protein "	0.6011	74	9	0.4775	56	5	0.9376	127	14	1.25463	0.155107	1.39547	1.62695	0.157289	2.17623	1.0785	0.00208966	1.04355	1.17609	0.223034	1.32728	1.11214	0.0526829	1.11433	1.133	0.0614447	1.14085	1.10692	0.456527	1.34906	1.15601	0.232941	1.33189	1.06379	0.807188	1.70957	1.1839	0.131212	1.26053	1.45473	0.19073	1.93729	1.14956	0.0962148	1.1828	1.17425
ENSMUSP00000031104	ENSMUSG00000029202	Pds5a	Q6A026 "Sister chromatid cohesion protein PDS5 homolog A "	0.4279	124	22	0.3821	76	25	0.5398	127	23	0.847644	0.0115952	1.13213	0.847855	0.0288327	1.15777	0.881647	8.73451e-07	1.03945	0.889221	0.122356	1.16395	0.953056	0.0361976	1.04574	0.9315	0.00169062	1.04203	0.779614	0.0116182	1.20516	0.78634	1.53705e-07	1.07033	0.886502	0.499154	1.4385	0.869102	0.091193	1.17929	0.878486	0.0450227	1.13478	0.903048	0.373348	1.26207	0.973053
ENSMUSP00000045073	ENSMUSG00000033732	Sf3b3	Q921M3 "Splicing factor 3B subunit 3 (Spliceosome-associated protein 130)(SAP 130)(Pre-mRNA-splicing factor SF3b 130 kDa subunit)(SF3b130)"	0.3739	91	25	0.3632	66	24	0.5152	112	22	0.968683	0.638988	1.14823	0.92132	0.0686384	1.09281	1.03311	0.228921	1.0562	0.945982	0.523926	1.19389	1.02903	0.211361	1.04713	0.961788	0.159413	1.05712	1.02262	0.866495	1.31214	0.972602	0.70184	1.15983	1.23462	0.135291	1.32608	0.945704	0.515141	1.19055	0.931746	0.0378823	1.06865	1.07893	0.204053	1.1281	0.938393
ENSMUSP00000028062	ENSMUSG00000026728	Vim	P20152 "Vimentin "	0.7275	80	29	0.8026	95	28	0.9013	100	26	1.23436	0.0861531	1.27469	1.23319	0.167984	1.35506	0.64574	3.56856e-09	1.10719	1.11673	0.381033	1.2901	1.26454	0.000110812	1.11246	1.22037	0.00075317	1.11286	1.87716	0.00141559	1.43704	1.44697	4.31619e-07	1.12035	1.05293	0.88947	2.13133	1.5743	0.00418188	1.34605	1.12746	0.343229	1.29109	1.24457	0.388687	1.67157	1.31025
ENSMUSP00000051432	ENSMUSG00000049932	H2afx	P27661 "Histone H2A.x (H2a/x)"	0.8392	89	3	0.8601	80	4	0.9021	143	5	1.60393	0.497252	11.8428	1.04229	0.940284	5.05407	0.807069	0.00424816	1.10699	1.73601	0.469888	14.6507	0.846889	0.0750857	1.21818	0.887601	0.0425776	1.11936	2.25489	0.346936	17.6177	0.916636	0.445789	1.37217	0.686959	0.647194	8.24762	2.31056	0.338204	17.9327	1.09379	0.861502	4.49089	0.737656	0.587534	4.19609	2.56268
ENSMUSP00000007814	ENSMUSG00000007670	Khsrp	Q3U0V1 "Far upstream element-binding protein 2 (FUSE-binding protein 2)(KH type-splicing regulatory protein)(KSRP)"	0.635	86	20	0.6578	87	22	0.7032	101	22	0.861464	0.122525	1.2133	0.826425	0.000108713	1.08709	0.774541	1.81237e-14	1.02917	1.07223	0.469409	1.21929	1.07426	0.258424	1.13685	1.07301	0.106125	1.09069	0.796953	0.12051	1.33987	0.8246	0.0472335	1.20962	0.991739	0.962734	1.4404	1.02998	0.75954	1.22103	0.993221	0.886291	1.10267	0.903219	0.135843	1.14626	0.915006
ENSMUSP00000033673	ENSMUSG00000031311	Nono	Q99K48 "Non-POU domain-containing octamer-binding protein (NonO protein)"	0.666	71	22	0.4672	50	17	0.7992	110	19	0.880239	0.403151	1.36553	0.842952	0.0075632	1.12588	1.01798	0.588878	1.0704	0.958199	0.793611	1.39925	1.01298	0.63649	1.05838	1.02951	0.430431	1.07869	0.96762	0.820038	1.34806	0.903153	0.268451	1.20727	1.07214	0.782409	1.68541	0.97312	0.844949	1.33228	0.911356	0.0895838	1.11504	1.14885	0.36928	1.37242	1.00544
ENSMUSP00000004470	ENSMUSG00000004356	Utp20	Q5XG71 "Small subunit processome component 20 homolog (Down-regulated in metastasis protein)"	0.2805	191	27	0.1657	75	26	0.387	161	25	0.861515	0.00747077	1.11142	0.867908	0.00682355	1.10403	1.14808	1.77672e-07	1.03963	0.888291	0.0466457	1.12366	0.963806	0.0438391	1.03642	0.896212	2.75803e-05	1.04445	0.851457	0.0116468	1.12956	0.837697	8.72799e-08	1.0503	0.834064	0.0388526	1.18691	0.833078	0.00423883	1.12727	0.835842	0.000167806	1.08718	0.880827	0.00820698	1.095	0.919512
ENSMUSP00000046101	ENSMUSG00000034994	Eef2	P58252 "Elongation factor 2 (EF-2)"	0.4417	82	25	0.4406	67	27	0.8392	155	33	1.33973	0.00399674	1.20879	1.32185	0.00149827	1.17546	1.40376	7.40961e-11	1.07525	1.20534	0.0645468	1.22014	0.929618	1.32002e-05	1.02842	1.11274	0.0149454	1.08828	1.2533	0.0374441	1.23558	1.11179	0.00623626	1.07595	1.15532	0.455197	1.47556	1.16123	0.0905668	1.19121	1.26794	0.000773816	1.13682	1.21338	0.0731482	1.23694	1.23724
ENSMUSP00000030187	ENSMUSG00000028465	Tln1	P26039 "Talin-1 "	0.2704	122	28	0.2129	74	22	0.5651	215	54	2.00175	4.49393e-10	1.15948	1.70331	4.83134e-10	1.10786	1.7691	3.51334e-26	1.05941	1.18609	0.00127769	1.10205	1.00809	0.853767	1.09396	1.12932	5.47381e-10	1.03275	1.48648	3.84723e-07	1.12874	1.32675	9.35905e-08	1.07692	1.37704	1.69023e-05	1.14524	1.39009	2.05853e-05	1.13949	1.31383	1.53287e-07	1.07659	1.37537	1.14376e-11	1.07696	1.38557
ENSMUSP00000025486	ENSMUSG00000024590	Lmnb1	P14733 "Lamin-B1 "	0.6276	84	23	0.602	65	23	0.8044	99	23	0.854654	0.0992507	1.20835	0.908849	0.505811	1.3405	1.01458	0.628705	1.06313	0.986453	0.895097	1.23623	0.981802	0.286951	1.03552	1.12093	0.00415849	1.07686	0.681505	0.000759019	1.22584	0.755184	3.91942e-06	1.10028	1.03765	0.853661	1.50798	0.887474	0.122019	1.16642	0.899773	0.396263	1.2881	1.01943	0.897315	1.35754	0.931351
ENSMUSP00000046908	ENSMUSG00000037236	Matr3	Q8K310 "Matrin-3 "	0.4255	81	20	0.5189	73	25	0.6702	122	26	0.989294	0.949334	1.41893	1.00393	0.977747	1.3338	0.956939	0.0289958	1.03991	1.05427	0.778006	1.47225	1.02248	0.356616	1.0501	1.00614	0.895568	1.09982	0.97633	0.90478	1.51412	0.968782	0.78355	1.26631	0.87425	0.544744	1.56966	1.00965	0.959565	1.47887	0.979286	0.870397	1.30017	0.867	0.14774	1.21751	0.981342
ENSMUSP00000112105	ENSMUSG00000021546	Hnrnpk	P61979 "Heterogeneous nuclear ribonucleoprotein K (hnRNP K)"	0.5754	67	19	0.7358	72	18	0.8877	92	17	1.05711	0.313468	1.11943	0.946731	0.757478	1.44492	0.99631	0.93423	1.09799	0.895854	0.11226	1.14861	0.96578	0.283504	1.06859	0.956834	0.372052	1.10723	0.972292	0.718297	1.17544	0.90736	0.0443949	1.0991	1.13929	0.266762	1.27157	0.986665	0.762612	1.09668	0.891968	0.455499	1.37143	0.952707	0.210997	1.08201	0.974173
ENSMUSP00000075067	ENSMUSG00000057113	Npm1	Q61937 "Nucleophosmin (NPM)(Nucleolar phosphoprotein B23)(Numatrin)(Nucleolar protein NO38)"	0.6575	76	15	0.6644	82	15	0.8356	89	12	0.820755	0.573246	2.09255	0.937686	0.782236	1.63196	1.20628	0.0249502	1.17247	0.753612	0.498789	2.40636	1.04098	0.439168	1.11427	1.09237	0.26958	1.18205	0.970431	0.942911	2.43039	0.968141	0.397952	1.08291	1.49798	0.151208	1.78003	1.00547	0.989304	2.36576	0.926199	0.708354	1.53839	1.11061	0.514193	1.40854	1.19579
ENSMUSP00000017629	ENSMUSG00000017485	Top2b	Q64511 "DNA topoisomerase 2-beta (EC 5.99.1.3)(DNA topoisomerase II, beta isozyme)"	0.3784	129	25	0.3747	102	25	0.5006	164	23	0.898371	0.242541	1.20276	0.807671	0.00463433	1.15166	0.881477	3.16736e-05	1.0515	1.04752	0.605091	1.20065	1.11355	0.00349967	1.07095	1.13552	0.000289088	1.0632	0.907692	0.33221	1.22383	0.855551	0.0173354	1.13425	0.876443	0.463613	1.44296	0.992545	0.93692	1.21303	0.955492	0.528902	1.15843	0.900929	0.307996	1.23039	0.968378
ENSMUSP00000050771	ENSMUSG00000005198	Polr2a	P08775 "DNA-directed RNA polymerase II subunit RPB1 (RNA polymerase II subunit B1)(EC 2.7.7.6)(DNA-directed RNA polymerase II subunit A)(DNA-directed RNA polymerase III largest subunit)"	0.2888	108	24	0.1802	55	19	0.3773	124	18	0.955051	0.372955	1.11058	0.935428	0.368388	1.16416	0.990205	0.628182	1.04301	1.0215	0.74504	1.14336	1.05418	0.330199	1.11713	1.05398	0.218712	1.09074	0.994586	0.965849	1.2969	0.920436	0.305267	1.17947	0.850265	0.182603	1.2793	0.985618	0.754831	1.09968	0.927173	0.1422	1.10905	0.894655	0.117674	1.15316	1.04293
ENSMUSP00000042658	ENSMUSG00000046434	Hnrnpa1	P49312 "Heterogeneous nuclear ribonucleoprotein A1 (hnRNP A1)(hnRNP core protein A1)(Helix-destabilizing protein)(HDP-1)(Single-strand-binding protein)(Topoisomerase-inhibitor suppressed)"	0.7319	123	12	0.6917	128	10	0.6783	107	13	1.59696	0.206706	2.17746	1.01203	0.985016	4.05579	1.08078	0.246943	1.1492	1.64498	0.232524	2.40976	1.06368	0.67779	1.38439	1.13053	0.172375	1.20229	2.18348	0.217764	3.7923	0.970109	0.941742	2.49303	0.756473	0.485625	2.32855	2.04851	0.095653	2.39076	0.987817	0.982189	3.34717	1.06825	0.826279	1.89892	1.95192
ENSMUSP00000110012	ENSMUSG00000031386	Hcfc1	B1AUX2;Q3USQ6 "Host cell factor C1 ";"Putative uncharacterized protein Fragment "	0.2719	86	22	0.2773	80	30	0.3403	117	18	0.920389	0.126462	1.11453	0.865398	0.00714472	1.10754	0.943058	0.264004	1.11303	1.03702	0.673063	1.19325	1.00904	0.818061	1.08255	1.04645	0.289109	1.0915	0.864975	0.176515	1.24075	0.844548	0.020677	1.15162	0.881096	0.145894	1.19156	1.00772	0.903325	1.13891	0.970704	0.428435	1.07865	0.969573	0.452232	1.08844	1.00541
ENSMUSP00000099475	ENSMUSG00000047126	Cltc	Q68FD5 "Clathrin heavy chain 1 "	0.3085	117	25	0.2585	61	25	0.2889	79	10	1.09557	0.198626	1.15316	1.06231	0.47152	1.18593	1.07834	0.0390151	1.07324	0.963109	0.56818	1.14347	1.10855	8.05597e-05	1.0459	1.02462	0.480486	1.07763	1.51865	0.000348831	1.23018	1.2945	0.00605473	1.19361	1.24292	0.28068	1.53511	1.18651	0.0158421	1.14564	1.03994	0.568281	1.14995	1.05622	0.476692	1.18131	1.23756
ENSMUSP00000054084	ENSMUSG00000050244	Heatr1	Q3T9I0;Q3TMK0;Q3TNE1;Q3UNW7;Q3V1X6;Q8BLJ4;Q8CCT5;Q8VCK1 "Putative uncharacterized protein Fragment ";"Putative uncharacterized protein Fragment ";"Putative uncharacterized protein Fragment ";"Putative uncharacterized protein Fragment ";"Putative uncharacterized protein Fragment ";"Putative uncharacterized protein Fragment ";"Putative uncharacterized protein ";"Heatr1 protein "	0.3112	165	24	0.2828	91	33	0.4116	130	27	0.9469	0.542115	1.20013	0.968619	0.529727	1.10763	1.09957	0.00512822	1.06593	0.894868	0.234179	1.20697	1.04395	0.216146	1.07191	0.888696	0.00419246	1.08036	0.868897	0.230471	1.26623	0.932573	0.13331	1.09671	1.18588	0.212764	1.31574	0.954059	0.636979	1.22563	0.96418	0.425862	1.0965	1.07715	0.186177	1.11911	1.0407
ENSMUSP00000111207	ENSMUSG00000024498	Tcerg1	Q8CGF7 "Transcription elongation regulator 1 (TATA box-binding protein-associated factor 2S)(Transcription factor CA150)(p144)(Formin-binding protein 28)(FBP 28)"	0.3994	85	24	0.2326	46	14	0.4182	83	15	0.947455	0.641926	1.26798	0.827797	0.00037709	1.08967	0.861123	2.83096e-06	1.04362	1.05874	0.651313	1.29482	1.04017	0.0237877	1.0338	1.03211	0.294378	1.06421	0.906907	0.466829	1.3148	0.895929	0.000962368	1.05756	0.884668	0.304618	1.27975	0.962885	0.780822	1.32112	0.896183	0.00082217	1.05625	0.876581	0.0124634	1.10363	0.941387
ENSMUSP00000034834	ENSMUSG00000032294	Pkm2	P52480 "Pyruvate kinase isozymes M1/M2 (EC 2.7.1.40)(Pyruvate kinase muscle isozyme)"	0.6554	76	23	0.6573	56	24	0.887	103	27	1.39748	0.00214883	1.22027	1.65374	1.85012e-06	1.17871	0.977516	0.160972	1.03293	0.939444	0.586477	1.26515	0.833681	3.42701e-05	1.07621	1.2778	4.56423e-08	1.06856	1.14284	0.375335	1.35879	1.08145	0.474734	1.24974	1.39932	0.104986	1.5087	1.32533	0.0152506	1.24828	1.51014	9.97653e-06	1.16364	1.40888	0.000325194	1.18564	1.12292
ENSMUSP00000027601	ENSMUSG00000026355	Mcm6	P97311 "DNA replication licensing factor MCM6 (Mis5 homolog)"	0.5225	97	24	0.4762	60	29	0.6139	84	22	0.899341	0.0527966	1.11349	0.871235	0.106108	1.1842	1.07604	0.00171998	1.04337	0.934262	0.308943	1.14479	0.949223	0.115363	1.06788	0.97279	0.18634	1.0429	0.969029	0.60585	1.13249	0.927361	0.0578469	1.08121	1.15203	0.32403	1.33841	0.806693	0.00363899	1.14716	0.856548	0.0548819	1.17149	1.02144	0.747418	1.14477	0.920072
ENSMUSP00000071569	ENSMUSG00000058006	Mdn1	A2ANY6;Q3TPE2;Q497I1;Q6IQZ8;Q6R5G2 "Midasin homolog (Yeast) ";"Putative uncharacterized protein Fragment ";"Mdn1 protein Fragment ";"Midasin homolog (Yeast) ";"Putative uncharacterized protein "	0.1872	265	27	0.1066	89	25	0.2602	275	14	0.877121	0.0130142	1.10639	0.733781	3.97753e-07	1.09714	1.03186	0.111729	1.04051	0.909988	0.0192499	1.08081	0.997516	0.934305	1.06357	0.970846	0.491225	1.09441	0.966701	0.469163	1.09942	0.967324	0.253303	1.06033	0.996177	0.978456	1.35063	0.912342	0.051062	1.0966	0.88325	0.00152468	1.07428	1.08157	0.152568	1.11791	0.99321
ENSMUSP00000027777	ENSMUSG00000026496	Parp1	P11103 "Poly [ADP-ribose] polymerase 1 (PARP-1)(EC 2.4.2.30)(NAD(+) ADP-ribosyltransferase 1)(ADPRT 1)(Poly[ADP-ribose] synthetase 1)(msPARP)"	0.4773	99	21	0.503	72	36	0.5789	102	26	1.05805	0.541803	1.20938	1.04475	0.533986	1.15198	1.18171	4.20037e-11	1.03164	0.902438	0.319345	1.23329	0.945158	0.0286094	1.05143	1.0879	0.010616	1.06485	0.834945	0.0445906	1.19191	0.845287	0.000185977	1.08509	0.972266	0.890491	1.51767	1.06874	0.463409	1.20434	1.02381	0.70425	1.13293	0.930193	0.525157	1.26025	0.85627
ENSMUSP00000002198	ENSMUSG00000002129	Sf3a1	Q8K4Z5 "Splicing factor 3A subunit 1 (SF3a120)"	0.5171	77	23	0.5107	55	20	0.5095	64	15	0.99241	0.925897	1.18335	0.965226	0.830363	1.40642	1.03759	0.0445774	1.03653	0.946105	0.519981	1.19256	1.00344	0.923789	1.07693	0.953957	0.425936	1.13122	0.996003	0.97071	1.25125	0.974064	0.801682	1.24102	1.08932	0.488419	1.29421	1.0117	0.885761	1.18096	0.93489	0.591592	1.2946	1.0402	0.403848	1.1032	1.01687
ENSMUSP00000000505	ENSMUSG00000029730	Mcm7	Q61881 "DNA replication licensing factor MCM7 (CDC47 homolog)"	0.5118	82	23	0.509	49	28	0.7483	107	23	0.856986	0.0496794	1.16662	0.839217	0.0468871	1.18854	1.06524	0.00175394	1.03751	0.918238	0.318172	1.18911	0.932268	0.033757	1.06645	1.00454	0.849924	1.05029	0.87538	0.103517	1.17648	0.902307	0.0259142	1.09361	0.961489	0.70158	1.23343	0.783012	0.00513009	1.17731	0.815791	0.011315	1.16576	0.929095	0.157757	1.10993	0.842243
ENSMUSP00000098035	ENSMUSG00000045482	Trrap	Q80YV3 "Transformation/transcription domain-associated protein (Tra1 homolog)"	0.2382	230	25	0.1237	79	25	0.3764	225	24	0.902783	0.201343	1.1743	0.903596	0.0750096	1.11898	0.982804	0.517399	1.0561	0.920789	0.23972	1.15175	0.950748	0.0220166	1.04349	0.91641	0.00638616	1.06204	0.855046	0.0708569	1.18648	0.937643	0.183978	1.10202	0.902761	0.595911	1.48229	0.838182	0.0134381	1.14629	0.885887	0.0163019	1.10164	0.847179	0.149683	1.25887	0.857374
ENSMUSP00000025774	ENSMUSG00000024853	Sf3b2	Q3UAI4;Q3UBH2;Q3UJB0;Q3UQU5;Q80W39;Q8BL33;Q9CS24 "Putative uncharacterized protein ";"Putative uncharacterized protein ";"Putative uncharacterized proteinSplicing factor 3b, subunit 2 ;";"Putative uncharacterized protein Fragment ";"Splicing factor 3b, subunit 2 ";"Putative uncharacterized protein Fragment ";"Putative uncharacterized protein Fragment "	0.4624	77	20	0.492	61	24	0.5923	90	19	0.898699	0.561594	1.45989	0.884461	0.00462783	1.08436	0.992803	0.809365	1.06394	0.858976	0.426179	1.47883	1.02439	0.198042	1.03834	1.0376	0.442395	1.10375	1.04519	0.806584	1.45145	0.977584	0.744495	1.15281	1.47631	0.114201	1.6372	0.943712	0.775874	1.52179	0.917135	0.00227993	1.05355	1.14215	0.114899	1.18359	0.951315
ENSMUSP00000106892	ENSMUSG00000060261	Gtf2i	Q9ESZ8 "General transcription factor II-I (GTFII-I)(TFII-I)(Bruton tyrosine kinase-associated protein 135)(BTK-associated protein 135)(BAP-135)"	0.4208	79	22	0.3238	49	14	0.5465	87	13	1.11465	0.274513	1.22288	0.939015	0.0725773	1.07204	1.02643	0.240177	1.04708	1.0434	0.686107	1.24066	0.973503	0.0960229	1.03285	0.93423	0.175788	1.10853	0.910705	0.378434	1.24138	0.829665	2.53127e-05	1.06557	0.870293	0.526975	1.5914	1.07324	0.506629	1.24307	0.900512	0.000438865	1.04967	0.890666	0.284724	1.25271	1.05873
ENSMUSP00000042283	ENSMUSG00000035726	Supt16h	Q920B9 "FACT complex subunit SPT16 (Facilitates chromatin transcription complex subunit SPT16)(FACT 140 kDa subunit)(FACTp140)(Chromatin-specific transcription elongation factor 140 kDa subunit)"	0.3926	101	18	0.4088	79	26	0.4403	88	12	0.757389	0.0565719	1.3319	0.718406	3.79389e-07	1.10507	0.912984	1.16126e-06	1.02119	0.986623	0.93169	1.3863	1.01937	0.426108	1.05005	1.00922	0.352112	1.02101	0.815565	0.230862	1.41365	0.849683	0.000150184	1.0781	1.16386	0.0172836	1.1267	0.989056	0.947518	1.41568	0.992199	0.865887	1.09917	1.05345	0.271778	1.10413	0.920794
ENSMUSP00000042457	ENSMUSG00000037742	Eef1a1	P10126 "Elongation factor 1-alpha 1 (EF-1-alpha-1)(Eukaryotic elongation factor 1 A-1)(eEF1A-1)(Elongation factor Tu)(EF-Tu)"	0.5693	71	16	0.7013	88	19	0.842	156	21	0.911537	0.640224	1.51252	0.906779	0.228533	1.17931	0.994958	0.924133	1.11553	0.906061	0.616925	1.50915	0.813802	1.26633e-05	1.07556	0.931014	0.375358	1.17874	0.818824	0.271934	1.45275	0.81441	0.19816	1.38101	1.03795	0.937038	2.64133	0.976112	0.885368	1.42099	0.900289	0.120665	1.14507	1.04361	0.813317	1.45084	1.12382
ENSMUSP00000084846	ENSMUSG00000030695	Aldoa	P05064 "Fructose-bisphosphate aldolase A (EC 4.1.2.13)(Muscle-type aldolase)(Aldolase 1)"	0.6148	65	19	0.7344	71	15	0.8301	81	15	1.19169	0.242024	1.35604	1.38111	2.01639e-05	1.11656	0.999899	0.99876	1.15	1.2689	0.158664	1.40528	0.598523	4.7755e-09	1.09099	1.33945	0.00768566	1.22336	0.388263	7.20884e-07	1.30781	0.480812	4.37199e-10	1.10907	1.20001	0.4385	1.633	1.35699	0.00863464	1.24319	1.3116	2.07234e-05	1.09731	1.46465	0.0297275	1.40256	0.808129
ENSMUSP00000037858	ENSMUSG00000024965	Fermt3	Q8K1B8 "Fermitin family homolog 3 (Unc-112-related protein 2)(Kindlin-3)"	0.5624	76	21	0.6301	55	23	0.6947	85	19	1.21919	0.0271862	1.18942	1.12474	0.0155013	1.09726	1.22383	0.00029143	1.09943	0.854338	0.0187687	1.13701	0.84371	8.12723e-06	1.06218	0.881663	0.00396569	1.08344	1.13805	0.220585	1.23779	1.23629	6.56536e-06	1.07692	2.26938	1.18772e-06	1.27266	0.757892	8.33948e-06	1.10092	0.747655	8.47698e-09	1.06811	0.953958	0.264719	1.08984	0.97022
ENSMUSP00000079722	ENSMUSG00000043962	Thrap3	Q569Z6 "Thyroid hormone receptor-associated protein 3 (Thyroid hormone receptor-associated protein complex 150 kDa component)(Trap150)"	0.4154	68	20	0.3491	55	22	0.5226	108	9	0.885753	0.145047	1.18185	0.813025	0.00581395	1.15057	0.950451	0.0375324	1.04819	1.0703	0.491417	1.22466	1.19931	6.87189e-08	1.04783	0.975093	0.242658	1.04719	1.25332	0.0341214	1.22999	0.985273	0.722937	1.08968	0.994943	0.956059	1.2283	1.06242	0.509107	1.20723	0.85327	0.014095	1.13119	0.999431	0.995253	1.23758	1.23086
ENSMUSP00000039656	ENSMUSG00000038759	Nup205	B0LAE1;B9EJ54;Q3UFI7;Q6P9L5;Q6P9Y6;Q6PDG0;Q6ZQG1;Q80VE6;Q9D6C1 "Nucleoporin 205 Fragment ";"Nup205 proteinMCG21756, isoform CRA_b ;";"Putative uncharacterized protein ";"Nup205 protein Fragment ";"Nup205 protein Fragment ";"Nup205 protein Fragment ";"MKIAA0225 proteinMCG21756, isoform CRA_a Fragment ;";"Nup205 protein Fragment ";"Putative uncharacterized protein "	0.2656	113	21	0.1921	62	25	0.4804	155	29	0.89492	0.220398	1.2009	0.856744	0.0254677	1.14333	0.956236	0.0139724	1.03557	0.841947	0.110221	1.23951	0.917133	0.0067294	1.06205	0.940901	0.223056	1.1053	0.863271	0.16295	1.2358	0.91925	0.00956327	1.06365	1.01716	0.888949	1.28055	0.847624	0.198712	1.29618	0.889657	0.0400124	1.11755	1.00108	0.981927	1.10204	0.922207
ENSMUSP00000002825	ENSMUSG00000002748	Baz1b	Q9Z277 "Tyrosine-protein kinase BAZ1B (EC 2.7.10.2)(Bromodomain adjacent to zinc finger domain protein 1B)(Williams syndrome transcription factor homolog)(Williams-Beuren syndrome chromosomal region 9 protein homolog)"	0.3347	99	21	0.213	48	16	0.4659	112	20	0.966193	0.5744	1.13389	0.954174	0.418964	1.12782	1.04216	0.0299031	1.03751	0.983645	0.811664	1.15312	0.975156	0.468919	1.07481	0.850233	3.95603e-06	1.05457	0.858201	0.0512212	1.16627	0.764645	0.00228956	1.16877	1.02645	0.87257	1.39954	0.877974	0.0591691	1.14531	0.902165	0.0866188	1.12711	0.872447	0.0886264	1.17249	1.03974
ENSMUSP00000072406	ENSMUSG00000029547	Ints1	Q6P4S8 "Integrator complex subunit 1 (Int1)"	0.2669	119	21	0.1517	54	15	0.3402	123	15	1.1043	0.150532	1.14847	0.98533	0.765977	1.1101	1.04129	0.500575	1.13373	0.988154	0.830739	1.12163	1.01742	0.587641	1.06902	0.95085	0.020136	1.04199	1.02422	0.79079	1.20406	1.08428	0.00615899	1.05537	1.08105	0.552093	1.31753	1.00395	0.953925	1.15111	0.981194	0.751761	1.13455	0.992925	0.92924	1.18458	0.968565
ENSMUSP00000061923	ENSMUSG00000002870	Mcm2	P97310 "DNA replication licensing factor MCM2 (Minichromosome maintenance protein 2 homolog)(Nuclear protein BM28)"	0.417	74	24	0.4137	60	24	0.6062	104	22	0.931809	0.639694	1.36075	0.801012	0.000390733	1.11707	1.13118	0.00155213	1.0731	0.985656	0.896946	1.2564	0.903574	0.0145624	1.08264	1.05164	0.308671	1.1056	0.979206	0.878006	1.32485	0.825231	0.0519681	1.21398	1.05027	0.591376	1.20578	0.857621	0.192595	1.26712	0.765037	1.86206e-09	1.05984	1.03195	0.441335	1.08692	0.916923
ENSMUSP00000071486	ENSMUSG00000062825	Actg1	P63260 "Actin, cytoplasmic 2 (Gamma-actin) [Contains Actin, cytoplasmic 2, N-terminally processed]"	0.64	86	8	0.6613	76	16				1.57869	0.179202	2.06167	1.67218	5.74698e-07	1.14174				1.09687	0.727452	1.8271	0.955072	0.202087	1.07619				0.941979	0.789069	1.66289	1.15096	0.0574149	1.15673				1.43315	0.0290818	1.36488	1.26191	0.000242344	1.10923				1.21844
ENSMUSP00000096547	ENSMUSG00000032187	Smarca4	O35845;Q6P8K2;Q7TQL1;Q8BQ54;Q8CGJ5 "Brg1 protein Fragment ";"Smarca4 protein Fragment ";"Smarca4 protein Fragment ";"Putative uncharacterized protein Fragment ";"Smarca4 protein Fragment "	0.3123	106	14	0.2529	66	13	0.4143	118	11	1.12325	0.0143591	1.09297	1.15107	0.0279659	1.13051	1.09249	0.0146297	1.06919	1.05384	0.409178	1.14203	1.0559	0.23277	1.0989	0.960658	0.144851	1.05818	1.102	0.24251	1.18688	1.04231	0.21278	1.07103	0.59658	0.047291	1.66365	1.12739	0.0382767	1.1189	1.09985	0.0861269	1.11731	0.841274	0.0630999	1.20229	1.15735
ENSMUSP00000099487	ENSMUSG00000027405	Nop56	Q9D6Z1 "Nucleolar protein 56 (Nucleolar protein 5A)"	0.4862	65	23	0.6	56	19	0.7207	84	17	0.979444	0.776829	1.16197	0.879003	0.156041	1.20084	0.992355	0.900027	1.13596	0.921679	0.245464	1.15229	1.02988	0.24006	1.05222	0.972221	0.822198	1.2988	0.96157	0.757908	1.29747	0.916089	0.185853	1.14324	0.910635	0.741231	1.80515	0.981145	0.808404	1.17452	0.947582	0.450283	1.15787	1.0518	0.745841	1.38352	1.02409
ENSMUSP00000006625	ENSMUSG00000006456	Rbm14	Q8C2Q3 "RNA-binding protein 14 (RNA-binding motif protein 14)"	0.423	50	19	0.4021	40	16	0.5321	56	14	0.951627	0.573438	1.19921	0.95372	0.126124	1.06433	1.05964	0.0251813	1.05073	0.912316	0.36728	1.2318	0.999652	0.991066	1.06717	1.00538	0.844576	1.05968	0.971225	0.718509	1.18237	0.925079	0.00208273	1.04571	0.937698	0.772232	1.60016	0.941686	0.522005	1.21326	0.933229	0.00725992	1.04859	0.88845	0.265877	1.24575	0.925471
ENSMUSP00000091921	ENSMUSG00000021270	Hsp90aa1	P07901 "Heat shock protein HSP 90-alpha (Heat shock 86 kDa)(HSP 86)(HSP86)(Tumor-specific transplantation 86 kDa antigen)(TSTA)"	0.4175	73	8	0.4106	50	10	0.7231	89	12	1.47326	0.00109407	1.17572	1.49112	0.00109105	1.21109	1.37003	2.74442e-08	1.05152	1.33433	0.00943927	1.2067	1.08377	0.18372	1.1347	1.24369	3.11769e-05	1.07359	1.31671	0.01171	1.20721	1.26584	0.00138279	1.12429	1.43597	0.0307847	1.37938	1.22995	0.0360857	1.20722	1.39355	0.000385087	1.14652	1.54996	0.000218539	1.19579	1.34962
ENSMUSP00000023353	ENSMUSG00000022673	Mcm4	P49717 "DNA replication licensing factor MCM4 (CDC21 homolog)(P1-CDC21)"	0.4234	73	18	0.3828	51	18	0.5742	79	20	0.878925	0.41495	1.38667	0.820156	0.00180373	1.11993	1.0959	2.66441e-05	1.0355	0.942654	0.712535	1.39627	0.945872	0.240476	1.10135	1.0912	0.160912	1.13339	0.982209	0.911346	1.40191	0.898447	0.258333	1.21313	0.927588	0.6853	1.46567	0.828434	0.279621	1.4284	0.818765	3.03277e-05	1.0779	0.887972	0.274379	1.24725	0.92476
ENSMUSP00000099979	ENSMUSG00000028312	Smc2	Q8CG48 "Structural maintenance of chromosomes protein 2 (SMC protein 2)(SMC-2)(Chromosome-associated protein E)(XCAP-E homolog)(FGF-inducible protein 16)"	0.3233	80	19	0.2939	51	20	0.4509	86	11	0.972527	0.56899	1.10614	0.934016	0.0121987	1.05293	0.898089	2.06961e-05	1.03246	0.947453	0.259705	1.10235	0.935995	2.56993e-07	1.01797	0.976727	0.319652	1.05138	0.776016	0.00130182	1.15037	0.833323	1.53618e-10	1.03132	0.877704	0.538781	1.57878	0.863626	0.0244216	1.13361	0.86613	3.81546e-07	1.04057	0.868175	0.0756567	1.17226	0.937644
ENSMUSP00000088365	ENSMUSG00000068882	Ssb	P32067 "Lupus La protein homolog (La ribonucleoprotein)(La autoantigen homolog)"	0.612	70	20	0.4988	44	18	0.747	56	17	0.848557	0.23826	1.32614	0.848704	0.258595	1.34465	0.817262	2.26103e-08	1.04309	0.795459	0.155287	1.38214	0.884433	4.11232e-06	1.03975	0.820055	1.15868e-06	1.05726	0.917784	0.671102	1.51639	1.04193	0.583146	1.16755	0.72831	0.44934	2.37889	0.819484	0.216327	1.38514	0.777627	0.0639046	1.30705	0.717413	0.127999	1.55054	0.920669
ENSMUSP00000089294	ENSMUSG00000069266	Hist2h4	P62806 "Histone H4 "	0.7573	89	14	0.7476	104	9	1	146	17	1.03674	0.8439	1.47404	0.907679	0.789351	2.24463	1.08097	0.0999091	1.09913	1.00792	0.96565	1.4746	0.889568	0.0223261	1.10024	1.23893	0.152428	1.35295	0.974772	0.89456	1.50435	0.773529	0.0336769	1.26032	1.35341	0.56211	2.95559	0.981176	0.919372	1.48841	0.82693	0.543905	1.99656	1.15494	0.646332	1.92131	1.05655
ENSMUSP00000034756	ENSMUSG00000032231	Anxa2	P07356 "Annexin A2 (Annexin-2)(Annexin II)(Lipocortin II)(Calpactin-1 heavy chain)(Calpactin I heavy chain)(Chromobindin-8)(p36)(Protein I)(Placental anticoagulant protein IV)(PAP-IV)"	0.6549	52	19	0.6106	39	20	0.5516	28	10	0.876355	0.176493	1.21787	1.14518	0.426781	1.41817	0.692229	0.00832736	1.28055	0.640196	0.000923772	1.26717	0.964101	0.344434	1.08212	1.42897	2.27525e-05	1.10658	1.02263	0.851296	1.28053	1.21797	6.54487e-06	1.06942	1.2861	0.0756459	1.32781	1.0894	0.469148	1.27544	0.60371	0.0020881	1.34536	1.20954	0.0145184	1.15323	1.12702
ENSMUSP00000028921	ENSMUSG00000027433	Xrn2	Q9DBR1 "5'-3' exoribonuclease 2 (EC 3.1.13.-)(Protein Dhm1)"	0.3838	76	21	0.3049	44	17	0.4953	83	17	0.943108	0.490196	1.19033	0.900553	0.134785	1.1514	0.944898	0.134965	1.07931	1.01825	0.852779	1.22295	1.07153	0.0130452	1.05385	0.984197	0.605103	1.06612	1.10465	0.352249	1.24356	1.03954	0.295406	1.07896	0.921031	0.604461	1.39101	1.03573	0.77206	1.28326	0.913906	0.149589	1.13438	0.890604	0.180178	1.19155	1.10826
ENSMUSP00000076989	ENSMUSG00000007850	Hnrnph1	Q8C2Q7 "Heterogeneous nuclear ribonucleoprotein H1Putative uncharacterized protein ;"	0.5011	60	3	0.539	41	1	0.7194	79	2	1.07306	0.919805	14.3915	0.924496			0.917917	0.854992	109.375	1.10458	0.892162	16.2814	0.876803			0.847446	0.495766	7.96784	1.28768	0.743942	18.2524	1.01792			1.1109	0.971412	8224157000000	1.20016	0.813308	18.5666	0.908207			0.871815	0.913165	327470	0.998436
ENSMUSP00000031167	ENSMUSG00000029250	Polr2b	Q8CFI7 "DNA-directed RNA polymerase II subunit RPB2 (EC 2.7.7.6)(DNA-directed RNA polymerase II subunit B)(RNA polymerase II subunit B2)(RNA polymerase II subunit 2)(DNA-directed RNA polymerase II 140 kDa polypeptide)"	0.3543	97	21	0.2249	37	17	0.4029	89	14	0.933752	0.242589	1.12608	0.932919	0.390736	1.18159	1.0151	0.638213	1.06958	0.989325	0.853919	1.12753	1.03275	0.0369472	1.03047	0.965652	0.131904	1.04808	1.00952	0.869496	1.12617	1.0311	0.24385	1.05513	1.02388	0.866656	1.3467	0.935959	0.220714	1.1154	0.912766	0.201579	1.15638	0.999784	0.997613	1.16211	0.998196
ENSMUSP00000089303	ENSMUSG00000070392	Hist2h3c1	P84228 "Histone H3.2 "	0.6354	76	2	0.8529	67	3	0.9116	168	5	1.56183	0.790515	16033200	0.952959	0.959994	38.9261	0.958652	0.575629	1.21239	1.99095	0.741737	703220200	1.01103	0.94081	1.7558	0.888871	0.4105	1.42787	1.69966	0.783994	196271800	0.82453	0.278561	1.7568	1.09296	0.868015	4.02737	1.86728	0.760196	514518600	0.927774	0.91719	15.5654	1.19544	0.313656	1.53779	1.9359
ENSMUSP00000094948	ENSMUSG00000019432	Bat1a	Q9Z1N5 "Spliceosome RNA helicase Bat1 (EC 3.6.1.-)(DEAD box protein UAP56)(56 kDa U2AF65-associated protein)(HLA-B-associated transcript 1 protein)"	0.5421	63	6	0.5	53	6	0.7617	76	7	1.26157	0.372935	1.84184	0.830023	0.38024	1.64528	0.959348	0.0760375	1.04857	1.17176	0.630829	2.21848	1.075	0.1215	1.10496	1.06141	0.396753	1.17332	0.921104	0.71913	1.74219	0.844055	0.0299469	1.15613	0.644814	0.073176	1.6406	1.00273	0.989907	1.69592	0.905335	0.56798	1.51976	0.99149	0.943002	1.32386	0.929326
ENSMUSP00000020123	ENSMUSG00000019961	Tmpo	Q61033 "Lamina-associated polypeptide 2, isoforms alpha/zeta (Thymopoietin isoforms alpha/zeta)(TP alpha/zeta)"	0.4704	65	11	0.4069	49	10	0.5873	84	9	0.931291	0.39918	1.19733	0.974017	0.415648	1.07228	0.982237	0.555723	1.06953	1.05764	0.504041	1.19741	1.04475	0.284502	1.0909	1.06376	0.0700771	1.0706	0.802626	0.0279452	1.21009	0.816084	0.000111035	1.07325	0.925402	0.302299	1.17604	0.931299	0.223249	1.12989	0.939247	0.0538624	1.06605	0.897897	0.0718253	1.12724	1.04182
ENSMUSP00000005003	ENSMUSG00000004880	Lbr	Q3U9G9 "Lamin-B receptor (Integral nuclear envelope inner membrane protein)"	0.4137	60	17	0.3866	53	20	0.4521	58	10	0.886873	0.501061	1.44732	0.910896	0.684481	1.60538	0.850996	3.07681e-05	1.0487	0.79381	0.217553	1.46429	0.879887	0.00130193	1.07367	1.14425	0.111188	1.18837	0.989563	0.962113	1.58556	0.893721	0.119212	1.15503	1.20138	0.537756	1.91143	1.21243	0.379064	1.57052	1.01234	0.951079	1.51139	1.29115	0.131226	1.41644	1.00665
ENSMUSP00000095170	ENSMUSG00000024613	Tcof1	Q05BH6 "Tcof1 protein Fragment "	0.2538	57	19	0.3053	59	26	0.3508	74	12	0.553806	3.33568e-05	1.25436	0.568665	2.85031e-08	1.15824	0.440492	7.15174e-08	1.15424	1.09197	0.424085	1.25357	1.20045	1.09077e-06	1.06067	1.17223	0.00235145	1.09307	0.88705	0.28007	1.25371	0.749023	3.03068e-07	1.08995	0.610142	0.0611642	1.68463	0.870739	0.248411	1.27607	0.833797	0.00608815	1.1331	0.806842	0.00881899	1.16035	1.03428
ENSMUSP00000121340	ENSMUSG00000002455	Prpf6	B7ZCS1;Q3ULJ7;Q542P0 "PRP6 pre-mRNA splicing factor 6 homolog (Yeast) Fragment ";"Putative uncharacterized protein ";"Putative uncharacterized proteinPRP6 pre-mRNA splicing factor 6 homolog (Yeast) ;"	0.4187	83	22	0.2816	41	15	0.4761	80	12	0.967896	0.344855	1.07276	0.951665	0.398895	1.1299	0.924358	0.00417754	1.04928	0.923008	0.0671087	1.09014	1.06471	0.00257733	1.03744	0.961634	0.296694	1.08177	1.05703	0.0963288	1.06851	1.02697	0.270783	1.05105	1.11127	0.520554	1.41889	0.875943	0.00107847	1.07507	0.884621	0.0124696	1.09612	0.981879	0.876723	1.28853	0.990244
ENSMUSP00000088616	ENSMUSG00000033335	Dnm2	P39054 "Dynamin-2 (EC 3.6.5.5)(Dynamin UDNM)"	0.3839	66	19	0.2934	34	16				0.961645	0.661066	1.2024	1.06044	0.205904	1.09919				0.820175	0.0158426	1.16929	0.805077	2.30617e-06	1.06464				0.894814	0.245938	1.21494	1.05521	0.10269	1.06811				0.865575	0.0777239	1.17601	0.984173	0.700461	1.09056				0.92017
ENSMUSP00000107602	ENSMUSG00000032481	Smarcc1	Q3UNN4 "Putative uncharacterized protein "	0.3712	75	15	0.4538	58	19	0.571	101	12	0.869024	0.397624	1.41214	1.01732	0.882247	1.27149	0.992367	0.748461	1.05263	0.813395	0.248553	1.44479	0.944924	0.0512944	1.05866	0.988993	0.816685	1.10805	0.892291	0.575964	1.53246	0.92682	0.207346	1.12984	1.01646	0.974218	2.96484	0.969644	0.857188	1.43437	1.08917	0.342695	1.20219	1.18112	0.360416	1.46804	1.05978
ENSMUSP00000059385	ENSMUSG00000022141	Nipbl	Q6KCD5 "Nipped-B-like protein (Delangin homolog)(SCC2 homolog)"	0.2244	146	19	0.1372	56	16	0.2759	133	9	0.787425	0.000911918	1.13508	0.754975	2.5171e-07	1.07022	0.82399	0.000948253	1.09178	0.889818	0.0851911	1.14414	0.983109	0.320845	1.03599	0.940038	0.0966246	1.07872	0.833271	0.0079333	1.13697	0.879917	6.18882e-06	1.04102	1.05397	0.424132	1.1548	0.845606	0.0267605	1.15729	0.806922	1.26393e-06	1.06074	0.879933	0.00430743	1.07777	0.827892
ENSMUSP00000038421	ENSMUSG00000034021	Pds5b	Q4VA53 "Sister chromatid cohesion protein PDS5 homolog B (Androgen-induced proliferation inhibitor)(Androgen-induced prostate proliferative shutoff-associated protein AS3)"	0.3071	97	19	0.2835	54	18	0.4882	110	19	0.93233	0.221363	1.12323	0.887393	0.193022	1.20439	0.998184	0.898662	1.03001	0.821172	0.010421	1.15577	0.901552	0.000833073	1.05549	0.914614	0.00123215	1.05021	0.805999	0.0233393	1.20063	0.764902	2.3722e-06	1.08485	0.766401	0.232607	1.57224	0.845084	0.0465308	1.17992	0.794342	0.00384788	1.15637	0.80557	0.122014	1.32302	0.928952
ENSMUSP00000020649	ENSMUSG00000020380	Rad50	P70388 "DNA repair protein RAD50 (mRad50)(EC 3.6.-.-)"	0.3079	90	20	0.3034	55	22	0.4611	99	15	1.26128	0.0249975	1.22098	1.1021	0.0524437	1.10336	1.17962	7.24093e-05	1.06601	0.916048	0.396571	1.23565	0.861583	1.13769e-07	1.04032	0.878657	2.74647e-05	1.04655	1.04089	0.740794	1.28386	0.951955	0.138351	1.06874	1.25631	0.0428814	1.24581	1.07256	0.532706	1.25949	0.989206	0.745876	1.07116	1.09243	0.189247	1.1473	1.20454
ENSMUSP00000093955	ENSMUSG00000071644	Eef1g	Q9D8N0 "Elongation factor 1-gamma (EF-1-gamma)(eEF-1B gamma)"	0.508	49	20	0.4508	37	18	0.6224	69	15	0.650882	0.0364475	1.49086	0.745561	0.187969	1.57087	1.16271	3.17431e-07	1.03638	0.772659	0.277622	1.62088	0.70765	4.17543e-05	1.14278	0.875265	0.00483959	1.08927	0.704017	0.144154	1.62075	0.820179	0.00781554	1.14886	1.29009	0.439886	1.98823	0.810166	0.409249	1.68563	0.93512	0.736946	1.51365	1.10108	0.408135	1.27404	0.682197
ENSMUSP00000005545	ENSMUSG00000005410	Mcm5	P49718 "DNA replication licensing factor MCM5 (CDC46 homolog)(P1-CDC46)"	0.4837	69	19	0.4973	48	22	0.6471	96	21	0.874411	0.0365077	1.13292	0.83273	0.00190228	1.11327	1.04479	0.0283322	1.03943	0.939852	0.429534	1.17499	0.952756	0.28806	1.09675	0.994469	0.907313	1.10311	0.919481	0.325119	1.19046	0.891646	0.00300165	1.0737	0.947483	0.768986	1.45933	0.796862	0.010319	1.18127	0.809473	2.53853e-05	1.08538	0.893826	0.0823608	1.13658	0.855951
ENSMUSP00000121201	ENSMUSG00000021998	Lcp1	Q3TJX0;Q3U6N7;Q3U6Z1;Q3U9M7 "Putative uncharacterized protein ";"Putative uncharacterized protein ";"Putative uncharacterized protein ";"Putative uncharacterized protein "	0.4753	54	21	0.4402	39	20	0.6842	63	19	0.860933	0.173953	1.24886	0.921758	0.235987	1.14951	0.746733	6.29656e-08	1.07234	1.38708	0.0217767	1.31483	1.17322	0.000453231	1.08225	1.51108	6.9386e-07	1.12387	1.27505	0.148105	1.4019	1.28438	0.00167837	1.15403	1.20718	0.253003	1.39792	1.17997	0.205467	1.30301	1.25652	0.00645686	1.1691	1.45849	0.000815672	1.21846	1.30528
ENSMUSP00000093959	ENSMUSG00000071646	Mta2	Q9R190 "Metastasis-associated protein MTA2 (Metastasis-associated 1-like 1)"	0.5419	79	16	0.5329	62	15	0.735	107	15	0.808118	0.216086	1.42463	0.869678	0.0704077	1.16525	0.910617	0.000285012	1.04277	0.993844	0.964852	1.34567	0.968101	0.019833	1.02681	1.04569	0.526041	1.15879	0.887174	0.571145	1.56053	0.97928	0.796459	1.18629	0.969052	0.86716	1.48558	0.934381	0.592364	1.30614	0.935616	0.351684	1.15971	0.836539	0.0769264	1.22203	1.16565
ENSMUSP00000111647	ENSMUSG00000064193	RP24-364O14.1	RP24-364O14.1 P17182 "Alpha-enolase (EC 4.2.1.11)(2-phospho-D-glycerate hydro-lyase)(Non-neural enolase)(NNE)(Enolase 1)"	0.6129	62	18	0.6083	39	14	0.9101	79	15	1.60155	0.0166483	1.45386	1.60839	0.00153119	1.29312	1.13051	3.97521e-05	1.04573	1.22406	0.268419	1.45185	0.952823	0.313122	1.10459	1.40764	3.80325e-05	1.13213	1.16448	0.419224	1.47419	1.03795	0.452586	1.1095	1.38952	0.386163	2.20081	1.26146	0.27651	1.54635	1.2256	0.0674646	1.24642	1.25904	0.340737	1.65032	1.20314
ENSMUSP00000096222	ENSMUSG00000015165	Hnrnpl	Q3UMT7;Q9CVU5 "Putative uncharacterized protein ";"Putative uncharacterized protein Fragment "	0.4307	50	15	0.5811	86	17	0.8463	93	15	1.03265	0.816972	1.33934	0.82348	0.331242	1.50818	1.01577	0.682725	1.08375	0.991304	0.948502	1.32965	1.04919	0.367883	1.11612	1.05511	0.280589	1.10797	1.04942	0.734764	1.34904	0.919246	0.289573	1.177	1.22667	0.41537	1.68556	1.08067	0.62302	1.39246	0.877119	0.437662	1.4179	1.01513	0.896483	1.27517	1.05954
ENSMUSP00000101517	ENSMUSG00000007880	Arid1a	A2BH40 "AT-rich interactive domain-containing protein 1A (ARID domain-containing protein 1A)(SWI/SNF-related, matrix-associated, actin-dependent regulator of chromatin subfamily F member 1)(SWI/SNF complex protein p270)(SWI-like protein)(Osa homolog 1)(BRG1-associated factor 250)(BAF250)(BRG1-associated factor 250a)(BAF250A)"	0.1866	66	15	0.1643	49	17	0.3158	107	18	0.909948	0.116072	1.12844	1.03242	0.695985	1.18532	0.981933	0.357469	1.04151	0.949028	0.335942	1.11921	1.04801	0.625392	1.22101	1.01751	0.662811	1.08602	0.868771	0.0523981	1.15299	0.941267	0.319765	1.13311	0.905286	0.553768	1.41561	0.952741	0.333229	1.10917	1.03904	0.592696	1.16038	0.938192	0.320806	1.1407	0.974518
ENSMUSP00000031092	ENSMUSG00000029191	Rfc1	P35601 "Replication factor C subunit 1 (Activator 1 subunit 1)(Replication factor C large subunit)(Replication factor C 140 kDa subunit)(RF-C 140 kDa subunit)(RFC140)(Activator 1 140 kDa subunit)(A1 140 kDa subunit)(Activator 1 large subunit)(A1-P145)(Diffe /.../tion-specific element-binding protein)(ISRE-binding protein)"	0.3333	70	19	0.2626	43	16	0.3068	68	11	1.18794	0.0334728	1.17019	1.05856	0.395716	1.1488	1.08366	0.05142	1.0843	1.10817	0.24938	1.19875	1.06714	0.016011	1.05235	0.931637	0.0121677	1.05302	0.970036	0.837254	1.35892	0.974063	0.349653	1.05973	0.854684	0.166376	1.26412	1.03266	0.737606	1.21954	0.879757	0.0554798	1.14053	0.811487	0.00103687	1.10737	1.16292
ENSMUSP00000055535	ENSMUSG00000055065	Ddx17	Q501J6 "Probable ATP-dependent RNA helicase DDX17 (EC 3.6.1.-)(DEAD box protein 17)"	0.5506	75	16	0.4663	49	14	0.6856	99	14	1.01659	0.912223	1.36709	0.835458	0.00687195	1.12871	0.790679	4.65768e-07	1.05665	0.901832	0.50811	1.38372	0.913752	3.88513e-05	1.03255	1.00981	0.847128	1.11321	1.00371	0.97493	1.27981	0.889192	0.000204422	1.05102	0.999038	0.99629	1.55556	1.18756	0.222601	1.33362	0.943102	0.16607	1.09006	1.01148	0.871833	1.16167	0.912131
ENSMUSP00000005705	ENSMUSG00000005566	Trim28	Q62318 "Transcription intermediary factor 1-beta (TIF1-beta)(Tripartite motif-containing protein 28)(KRAB-A-interacting protein)(KRIP-1)"	0.3921	60	19	0.3058	44	18	0.6259	84	20	1.07467	0.583814	1.31154	1.03988	0.758851	1.30277	0.983666	0.442602	1.04494	1.0098	0.949105	1.37246	1.0833	0.159469	1.12159	1.15415	0.0103471	1.11122	0.931373	0.665481	1.40469	0.87956	0.0494601	1.13656	0.920402	0.64662	1.45159	0.979228	0.862283	1.28482	0.980146	0.841349	1.23143	1.04852	0.592193	1.1996	0.935081
ENSMUSP00000016463	ENSMUSG00000016319	Slc25a5	P51881 "ADP/ATP translocase 2 (Adenine nucleotide translocator 2)(ANT 2)(ADP,ATP carrier protein 2)(Solute carrier family 25 member 5)"	0.6208	59	8	0.5738	48	9	0.7785	71	8	1.28411	0.481226	2.21473	1.23112	0.720808	3.65094	0.771005	0.00931136	1.18901	1.42797	0.392892	2.5231	1.37632	0.00731149	1.22927	1.37225	0.00346963	1.18904	1.61174	0.309401	2.80133	1.38182	0.129753	1.55522	0.907421	0.806845	2.47143	1.537	0.325868	2.61762	1.39856	0.546504	3.4164	1.03553	0.903536	1.92928	1.60984
ENSMUSP00000065940	ENSMUSG00000054717	Hmgb2	P30681 "High mobility group protein B2 (High mobility group protein 2)(HMG-2)"	0.519	52	10	0.6571	55	12	0.719	57	11	0.620465	0.492436	4.61887	0.820721	0.441617	1.72419	0.576812	2.55139e-05	1.18241	1.06628	0.934802	5.77213	0.892238	6.4951e-05	1.04115	1.09224	0.184414	1.14785	0.836641	0.843565	7.52101	0.703445	0.0048936	1.24689	0.944468	0.921205	3.63506	1.01569	0.985057	6.41633	1.07907	0.756407	1.69321	0.810826	0.69478	3.1795	1.2024
ENSMUSP00000103433	ENSMUSG00000034349	Smc4	Q3UR81;Q6P7V9 "Putative uncharacterized protein Fragment ";"Smc4 protein "	0.3289	93	19	0.2331	42	17	0.395	97	10	0.999551	0.996542	1.24077	0.953645	0.331667	1.10573	0.841921	0.000173884	1.06561	0.997686	0.983864	1.26799	0.866661	3.48433e-08	1.03134	0.938065	0.0486218	1.06551	0.863657	0.17385	1.24295	0.804278	0.000869936	1.11979	0.857944	0.62915	2.00033	0.954576	0.64222	1.22961	0.960926	0.364577	1.09477	0.913354	0.274529	1.19267	1.00081
ENSMUSP00000108662	ENSMUSG00000001228	Uhrf1	Q8VDF2 "E3 ubiquitin-protein ligase UHRF1 (EC 6.3.2.-)(Ubiquitin-like PHD and RING finger domain-containing protein 1)(Ubiquitin-like-containing PHD and RING finger domains protein 1)(Nuclear zinc finger protein Np95)(Nuclear protein 95)"	0.4092	58	18							1.07765	0.219424	1.13206							1.35039	0.000736549	1.16539							1.06722	0.401705	1.17362							1.08813	0.0991638	1.1077							1.36795
ENSMUSP00000082868	ENSMUSG00000042557	Sin3a	Q60520 "Paired amphipathic helix protein Sin3a (Transcriptional corepressor Sin3a)(Histone deacetylase complex subunit Sin3a)"	0.3042	64	22	0.202	36	16	0.2925	59	12	0.846618	0.0686662	1.19778	0.824111	0.0110212	1.15282	0.823592	1.57563e-07	1.03735	0.83071	0.0737029	1.22745	0.93783	0.00151628	1.03599	0.908526	0.0266323	1.08606	0.739599	0.0212031	1.28649	0.789269	0.00830039	1.18055	0.951052	0.896689	2.29625	0.839672	0.049402	1.19038	0.827898	0.000471842	1.09476	0.842844	0.0950285	1.2288	0.91861
ENSMUSP00000101831	ENSMUSG00000028649	Macf1	B1ARU4;Q3V3W8 "Microtubule-actin crosslinking factor 1 ";"Putative uncharacterized protein Fragment "	0.1783	306	1				0.2482	338	11	1.93697						1.18159	0.0158263	1.13676	0.747231						0.943548	0.0919206	1.07193	0.855361						0.922793	0.355442	1.20294	0.84647						0.955875	0.393262	1.11929	0.782954
ENSMUSP00000107595	ENSMUSG00000059005	Gm6793	Q8BG05 "Heterogeneous nuclear ribonucleoprotein A3 (hnRNP A3)"	0.6491	87	2	0.6887	116	10	0.7625	93	9	1.47809	0.233213	6.71788	1.17087	0.722654	2.6493	1.17113	0.0824364	1.20146	1.17826	0.660933	34.3341	0.949029	0.485426	1.17665	0.957981	0.65027	1.23393	1.51791	0.35518	27.3613	1.00596	0.963187	1.32774	0.780268	0.832025	13.6107	1.42937	0.446764	46.383	0.97869	0.956535	2.38566	0.789056	0.730985	4.63797	1.32328
ENSMUSP00000001479	ENSMUSG00000001440	Kpnb1	P70168 "Importin subunit beta-1 (Karyopherin subunit beta-1)(Nuclear factor p97)(Pore targeting complex 97 kDa subunit)(PTAC97)(SCG)"	0.3847	58	17	0.3356	44	19	0.5913	73	21	1.10723	0.577541	1.46202	0.900465	0.279986	1.21867	0.866227	2.2666e-07	1.03988	1.13696	0.46889	1.44307	0.936836	0.0168619	1.05343	0.89098	0.000230224	1.05524	1.25256	0.208923	1.43998	0.9643	0.221928	1.06223	1.00167	0.995698	1.89797	1.13404	0.504991	1.47847	0.965264	0.667613	1.18547	0.985338	0.934473	1.44781	1.22879
ENSMUSP00000097747	ENSMUSG00000026864	Hspa5	P20029 "78 kDa glucose-regulated protein Precursor (GRP-78)(Heat shock 70 kDa protein 5)(Immunoglobulin heavy chain-binding protein)(BiP)"	0.5191	58	17	0.4214	43	19	0.5206	56	10	1.62853	2.31763e-05	1.19217	1.63479	2.94978e-08	1.11818	1.4764	1.70366e-07	1.06355	1.31669	0.00251926	1.17711	1.06554	0.0169932	1.05203	1.11021	0.000227071	1.04085	1.88934	0.00118285	1.40882	1.77118	9.99841e-12	1.08206	1.73243	0.000156754	1.22156	1.32586	0.00587039	1.20609	1.42747	4.34742e-07	1.10224	1.28921	0.00112884	1.13021	1.99617
ENSMUSP00000044395	ENSMUSG00000052565	Hist1h1d	P43277 "Histone H1.3 (H1 VAR.4)(H1d)"	0.5294	57	1	0.7466	81	3	0.8643	77	3	1.1075			1.15624	0.817543	10.8084	1.09048	0.486948	1.55415	1.21625			1.25603	0.27106	1.91821	0.864588	0.375098	1.73863	0.714044			0.927883	0.680641	1.96557	1.42043	0.920746	681207	0.650262			0.82868	0.752691	9.39534	0.864842	0.895373	66.6638	1.36467
ENSMUSP00000000804	ENSMUSG00000000787	Ddx3x	Q62167 "ATP-dependent RNA helicase DDX3X (EC 3.6.1.-)(DEAD box protein 3, X-chromosomal)(DEAD box RNA helicase DEAD3)(mDEAD3)(Embryonic RNA helicase)(D1Pas1-related sequence 2)"	0.5272	61	16	0.4909	48	20	0.5816	66	14	0.976489	0.846609	1.29382	1.07381	0.319895	1.15711	1.17275	2.28944e-06	1.04406	1.01333	0.922196	1.32866	1.01918	0.479262	1.05664	0.987845	0.682735	1.06523	1.33284	0.0117659	1.23811	1.18435	0.0118966	1.13578	1.08601	0.612272	1.40941	1.07223	0.566923	1.28895	1.09523	0.206682	1.15676	1.14956	0.145862	1.21485	1.33072
ENSMUSP00000026667	ENSMUSG00000025580	Eif4a3	Q91VC3 "Eukaryotic initiation factor 4A-III (eIF-4A-III)(eIF4A-III)(EC 3.6.1.-)(Eukaryotic translation initiation factor 4A isoform 3)(ATP-dependent RNA helicase eIF4A-3)(ATP-dependent RNA helicase DDX48)(DEAD box protein 48)"	0.5742	53	16							0.970636	0.742046	1.20975							0.942635	0.482442	1.19198							0.970305	0.83634	1.35965							0.983208	0.860442	1.22488							1.00339
ENSMUSP00000076971	ENSMUSG00000027067	Ssrp1	Q08943 "FACT complex subunit SSRP1 (Facilitates chromatin transcription complex subunit SSRP1)(Structure-specific recognition protein 1)(Recombination signal sequence recognition protein 1)(T160)"	0.3898	57	20	0.4534	44	19	0.4562	53	8	0.764331	0.00269038	1.17716	0.684479	7.78825e-08	1.09634	0.897628	0.00694466	1.07002	0.976928	0.796369	1.20525	1.01641	0.591585	1.0646	1.03319	0.36697	1.08337	0.814386	0.0178554	1.18026	0.826429	0.00147843	1.11284	1.0791	0.416872	1.23205	1.00576	0.953979	1.22808	0.980633	0.3404	1.04285	0.982215	0.636483	1.08973	0.933941
ENSMUSP00000080302	ENSMUSG00000062070	Pgk1	P09411 "Phosphoglycerate kinase 1 (EC 2.7.2.3)"	0.5947	67	13	0.5875	45	17	0.8225	62	17	1.13799	0.460994	1.44749	1.35366	0.0128518	1.25772	0.881109	4.4785e-05	1.04963	1.03422	0.8671	1.53548	0.956484	0.167465	1.0674	1.51046	7.57538e-07	1.11847	0.994454	0.984333	1.82996	0.9356	0.504382	1.22952	1.36153	0.138237	1.52089	1.2592	0.309569	1.60532	1.43466	0.00212	1.23262	1.39012	0.00390446	1.23029	1.07889
ENSMUSP00000074238	ENSMUSG00000020358	Hnrnpab	Q99020 "Heterogeneous nuclear ribonucleoprotein A/B (hnRNP A/B)(CArG-binding factor-A)(CBF-A)"	0.614	60	11	0.6526	62	14	0.6351	47	8	0.949572	0.891495	2.30275	0.919769	0.884776	3.39506	0.952308	0.521764	1.18696	0.902843	0.814164	2.59901	0.846779	0.0115608	1.13012	0.923903	0.37316	1.21748	0.922187	0.903284	4.33235	0.810894	0.527475	2.00846	0.902147	0.606855	1.57172	0.920468	0.845357	2.54414	0.867498	0.770758	2.80638	0.866036	0.283555	1.34029	1.08564
ENSMUSP00000069432	ENSMUSG00000041638	Gcn1l1	B2RWW6;Q3U3Z4;Q3UHQ5;Q640Q4;Q6NV94;Q6PGM5;Q8BTM7;Q8CHH7 "GCN1 general control of amino-acid synthesis 1-like 1 (Yeast) ";"Putative uncharacterized protein Fragment ";"Putative uncharacterized protein ";"Gcn1l1 protein Fragment ";"Gcn1l1 protein ";"Gcn1l1 protein Fragment ";"Putative uncharacterized protein Fragment ";"MKIAA0219 protein Fragment "	0.225	132	18	0.1269	50	11	0.3894	151	26	0.995596	0.940605	1.1316	1.14744	0.0306109	1.12953	0.973568	0.717661	1.16287	0.877324	0.0285023	1.12217	0.974496	0.526304	1.09163	0.850689	0.0413896	1.16756	0.866848	0.0053802	1.09874	0.94585	0.332547	1.12954	0.710455	0.0328321	1.36573	0.900848	0.0269724	1.09517	0.88758	0.0399004	1.11913	0.774184	0.0199821	1.23631	0.948692
ENSMUSP00000107110	ENSMUSG00000022185	Acin1	Q9JIX8 "Apoptotic chromatin condensation inducer in the nucleus (Acinus)"	0.302	84	16	0.3552	63	20	0.5131	122	17	0.90865	0.237472	1.18116	0.901152	0.391947	1.28231	0.892107	0.00236676	1.06942	1.00723	0.943539	1.23889	1.09428	0.0998933	1.11519	1.04734	0.299242	1.0957	0.951115	0.672773	1.28304	0.959446	0.307577	1.08615	1.0831	0.334531	1.1854	1.07747	0.419516	1.21114	1.00197	0.98494	1.24069	1.0114	0.841657	1.12561	1.07522
ENSMUSP00000026495	ENSMUSG00000025428	Atp5a1	Q03265 "ATP synthase subunit alpha, mitochondrial Precursor "	0.5099	52	15	0.4376	33	19	0.7414	84	22	1.07329	0.40491	1.19322	1.06419	0.344048	1.14398	0.826738	1.40772e-08	1.04543	1.01397	0.892252	1.24077	0.897164	0.000516125	1.05553	1.04544	0.237239	1.07894	1.13569	0.3108	1.29635	1.18992	6.532e-05	1.07332	1.25729	0.132324	1.35545	1.08724	0.447053	1.25775	1.24236	0.000773999	1.11957	1.02222	0.799462	1.19443	1.13385
ENSMUSP00000000642	ENSMUSG00000000628	Hk2	O08528 "Hexokinase-2 (EC 2.7.1.1)(Hexokinase type II)(HK II)"	0.3173	58	12	0.4744	58	24	0.4569	67	9	0.850461	0.281348	1.37288	0.839549	0.0011721	1.10265	0.391519	6.02961e-06	1.22947	1.39975	0.0635331	1.43211	1.69794	2.5078e-14	1.06798	1.35786	4.56695e-07	1.04924	1.83482	0.0229161	1.6549	1.36902	2.11344e-05	1.12991	0.616249	0.00014374	1.17959	1.63534	0.0111302	1.42302	1.14942	8.85503e-05	1.06264	0.878266	0.00362693	1.07649	1.39605
ENSMUSP00000028608	ENSMUSG00000027185	Nat10	Q8K224 "N-acetyltransferase 10 (EC 2.3.1.-)"	0.3457	71	15	0.3711	61	24	0.5859	96	23	0.971287	0.358891	1.0684	0.877285	0.00343798	1.08662	1.04157	0.0903579	1.04884	0.977622	0.638368	1.10693	1.07507	0.00489834	1.04929	0.981486	0.574181	1.07031	1.10505	0.0457586	1.10262	1.05428	0.190464	1.08445	1.14885	0.115984	1.19229	1.08784	0.136704	1.12148	0.979228	0.567554	1.07775	1.01032	0.837141	1.10781	1.16532
ENSMUSP00000091085	ENSMUSG00000070490	AC142167.1	AC142167.1 Q2VWQ4 "GAPDH Fragment "	0.6113	47	13							1.70797	0.000203578	1.24866							1.11753	0.412599	1.33011							1.16495	0.294778	1.35482							1.16358	0.260436	1.32246							1.17405
ENSMUSP00000027602	ENSMUSG00000026356	Dars	Q922B2 "Aspartyl-tRNA synthetase, cytoplasmic (EC 6.1.1.12)(Aspartate--tRNA ligase)(AspRS)"	0.5489	68	15	0.5788	41	23	0.5689	53	12	1.0584	0.625179	1.27601	0.950379	0.374193	1.12341	0.999289	0.95655	1.02849	0.685755	8.78009e-05	1.16051	0.664853	2.72428e-09	1.0926	1.07259	0.424949	1.2046	0.78926	0.0321707	1.23792	0.769594	1.41327e-05	1.10286	1.01902	0.894026	1.3556	0.96935	0.748606	1.22665	0.935491	0.139182	1.09432	1.17748	0.00214703	1.09448	0.585862
ENSMUSP00000113431	ENSMUSG00000005846	Rsl1d1	Q3TAJ5;Q3TGI9;Q3TH37;Q3TLJ3;Q3TN25;Q3TS64;Q8BVY0;Q8K235;Q9CSF9 "Putative uncharacterized protein ";"Putative uncharacterized protein ";"Putative uncharacterized protein ";"Putative uncharacterized protein ";"Putative uncharacterized protein ";"Putative uncharacterized protein ";"Putative uncharacterized protein ";"Rsl1d1 protein ";"Putative uncharacterized protein Fragment "	0.4867	52	17	0.427	30	14	0.7613	67	18	1.03011	0.867449	1.44899	1.04854	0.608489	1.21536	0.990695	0.684028	1.04898	1.02296	0.913015	1.54275	1.01591	0.749362	1.11013	0.853287	0.078337	1.19583	1.118	0.573846	1.50961	1.01768	0.507121	1.05705	1.02542	0.926241	1.76082	1.27391	0.196738	1.46376	1.16935	0.0742019	1.19014	1.11238	0.468748	1.35557	1.33459
ENSMUSP00000032629	ENSMUSG00000030447	Cyfip1	Q7TMB8 "Cytoplasmic FMR1-interacting protein 1 (Specifically Rac1-associated protein 1)(Sra-1)"	0.2897	85	8							0.80855	0.0525472	1.24064							0.946716	0.63283	1.29605							1.0255	0.848958	1.35162							0.91254	0.359119	1.24679							1.04351
ENSMUSP00000086928	ENSMUSG00000068262	AC158626.1	AC158626.1 AC158626.1-201 "null" "Clone_based_ensembl_transcript"	0.4789	56	14	0.4392	36	10	0.6923	54	10	1.0912	0.698354	1.60929	1.22629	0.00370552	1.1233	1.05652	0.136381	1.079	0.971881	0.896852	1.59364	1.04838	0.0338849	1.04356	1.01717	0.716777	1.10833	1.11247	0.669962	1.69547	1.18904	0.000198552	1.06387	1.11622	0.807344	2.69198	1.10344	0.688748	1.68043	1.17142	0.000785344	1.07214	1.39261	0.238112	1.80911	1.16484
ENSMUSP00000027123	ENSMUSG00000025980	Hspd1	P63038 "60 kDa heat shock protein, mitochondrial Precursor (Heat shock protein 60)(HSP-60)(Hsp60)(60 kDa chaperonin)(Chaperonin 60)(CPN60)(Mitochondrial matrix protein P1)(HSP-65)"	0.4642	49	15	0.4572	38	14	0.8045	67	21	1.13521	0.268194	1.26607	1.00755	0.936724	1.22227	1.10438	0.00013336	1.04492	1.20198	0.188389	1.33027	0.974625	0.461333	1.07588	1.10563	0.0402274	1.10019	1.40716	0.018695	1.31724	1.23906	0.00109125	1.11731	1.27573	0.220413	1.49416	1.61234	0.00274972	1.32649	1.41654	0.00181331	1.21249	1.31947	0.033106	1.28745	1.49613
ENSMUSP00000018143	ENSMUSG00000017999	Ddx27	Q921N6 "Probable ATP-dependent RNA helicase DDX27 (EC 3.6.1.-)(DEAD box protein 27)"	0.3763	61	17	0.3658	38	19	0.2816	46	7	1.0367	0.460325	1.10628	1.11261	0.209669	1.18807	1.20396	4.11683e-05	1.04372	0.977543	0.68414	1.12324	1.06432	0.0169815	1.05106	0.812496	6.02969e-05	1.0525	1.21674	0.000829465	1.10665	1.20768	0.000140313	1.08592	1.35526	0.00776778	1.20874	1.15895	0.0101154	1.11324	1.21877	0.0121326	1.16075	1.21517	0.000174444	1.0597	1.27589
ENSMUSP00000052465	ENSMUSG00000038299	Wdr36	Q3TA68;Q3TAQ9;Q3USW8;Q505Q0;Q6NSU4;Q8BHI6;Q8VDN1 "Putative uncharacterized proteinWD repeat domain 36, isoform CRA_a ;";"Putative uncharacterized protein ";"Putative uncharacterized protein Fragment ";"Wdr36 protein ";"Wdr36 protein Fragment ";"Putative uncharacterized protein ";"Wdr36 protein Fragment "	0.3582	78	16	0.2481	36	10	0.3782	49	12	1.17194	0.175572	1.26848	1.14894	0.19579	1.25201	1.02224	0.463644	1.06583	1.0222	0.842136	1.25975	1.03594	0.32053	1.07893	0.794358	4.19861e-05	1.08058	1.0695	0.726327	1.49404	1.06872	0.154405	1.10153	0.819605	0.309671	1.50848	1.11709	0.482015	1.38721	1.09024	0.323182	1.2056	1.00646	0.904566	1.12252	1.16589
ENSMUSP00000101451	ENSMUSG00000028759	Hp1bp3	A2AM63 "Heterochromatin protein 1, binding protein 3 Fragment "	0.3845	55	13	0.4188	39	13	0.6083	61	14	1.22989	0.0958879	1.28343	0.970405	0.791439	1.27389	0.978028	0.607107	1.09534	1.26181	0.0496984	1.26138	1.08391	0.156859	1.12329	0.94642	0.474919	1.17546	1.04265	0.660173	1.22371	0.830657	0.00375338	1.11941	0.772197	0.38603	1.8636	1.13925	0.213615	1.24146	0.912247	0.37948	1.24524	0.756337	0.111179	1.42325	1.25839
ENSMUSP00000065770	ENSMUSG00000032178	Ilf3	Q9Z1X4 "Interleukin enhancer-binding factor 3 "	0.3541	61	11	0.3374	45	17	0.4989	72	16	0.899167	0.0348879	1.10195	0.923436	0.208498	1.13752	1.11269	0.291438	1.23133	0.977463	0.525722	1.08031	1.05451	0.0158535	1.0426	0.981936	0.435859	1.04972	1.01931	0.577246	1.07676	1.06082	0.0752541	1.068	0.8956	0.619889	1.59031	1.14758	0.00347478	1.08401	1.13193	0.0312262	1.11768	1.06605	0.467564	1.20066	1.12155
ENSMUSP00000047123	ENSMUSG00000038279	Nop2	Q922K7 "Putative ribosomal RNA methyltransferase NOP2 (EC 2.1.1.-)(Nucleolar protein 2 homolog)(Nucleolar protein 1)(Proliferating-cell nucleolar antigen p120)(Proliferation-associated nucleolar protein p120)"	0.3413	57	15	0.3539	44	15	0.4597	72	9	1.05959	0.715162	1.39566	1.0054	0.9527	1.21093	0.996386	0.925695	1.09062	1.00737	0.96157	1.37864	0.939914	0.0984671	1.07798	0.809906	0.000296095	1.08326	1.04092	0.832984	1.4924	0.982971	0.623314	1.07611	1.25005	0.0317579	1.21916	1.13798	0.451308	1.43017	1.07507	0.158243	1.10977	1.15305	0.0410254	1.14453	1.20033
ENSMUSP00000096411	ENSMUSG00000056394	Lig1	P37913 "DNA ligase 1 (EC 6.5.1.1)(DNA ligase I)(Polydeoxyribonucleotide synthase [ATP] 1)"	0.323	55	14	0.2511	36	16	0.6041	83	17	0.887503	0.288092	1.26204	0.870019	0.026769	1.12846	1.03747	0.0850816	1.0434	0.936965	0.590336	1.29019	0.973332	0.280028	1.05274	1.00122	0.965858	1.06111	0.727201	0.00757411	1.24356	0.738609	4.83938e-05	1.12164	0.933019	0.677138	1.4142	0.846869	0.0752614	1.20405	0.86142	0.00762897	1.10874	0.834361	0.0771412	1.22534	0.840696
ENSMUSP00000031061	ENSMUSG00000029169	Dhx15	O35286 "Putative pre-mRNA-splicing factor ATP-dependent RNA helicase DHX15 (EC 3.6.1.-)(DEAH box protein 15)"	0.3987	62	16	0.3421	46	17	0.5358	75	20	0.979738	0.705503	1.12057	0.955309	0.400348	1.11872	1.12338	2.40054e-08	1.02716	0.988908	0.7881	1.09125	1.07858	0.0287646	1.06902	0.99655	0.871977	1.04528	1.02436	0.681583	1.13112	1.02524	0.760451	1.18574	0.957801	0.795821	1.4104	1.01193	0.755835	1.08353	0.987559	0.833411	1.13218	1.00669	0.949355	1.24211	1.05652
ENSMUSP00000071794	ENSMUSG00000034022	Cpsf1	Q9EPU4 "Cleavage and polyadenylation specificity factor subunit 1 (Cleavage and polyadenylation specificity factor 160 kDa subunit)(CPSF 160 kDa subunit)"	0.3046	84	20	0.2575	41	20	0.3387	85	16	0.873227	0.0225543	1.12108	0.771836	0.000665815	1.14278	0.908934	0.00679938	1.06704	0.936952	0.232983	1.11699	1.01141	0.623755	1.04876	1.01246	0.651254	1.05886	0.849545	0.0101121	1.12693	0.868939	1.3058e-05	1.05178	0.845572	0.0693511	1.20051	0.766245	0.000729904	1.14761	0.799103	0.000568457	1.12034	0.839527	0.000349689	1.08448	0.816895
ENSMUSP00000084572	ENSMUSG00000007029	Vars	Q9Z1Q9 "Valyl-tRNA synthetase (EC 6.1.1.9)(Valine--tRNA ligase)(ValRS)(Protein G7a)"	0.3476	88	17	0.285	46	14	0.4592	84	10	1.11637	0.296532	1.24142	0.981235	0.716557	1.11658	1.397	0.000156879	1.12949	1.12157	0.323367	1.26958	0.962201	0.522148	1.13488	1.14286	0.000578574	1.06003	0.827546	0.23827	1.38758	0.746352	0.00557933	1.20998	1.14961	0.516433	1.59518	0.995883	0.96381	1.20895	0.966102	0.32568	1.07565	1.14563	0.133418	1.20494	0.857421
ENSMUSP00000026470	ENSMUSG00000025403	Shmt2	Q3TFD0;Q99K87;Q9CZN7 "Serine hydroxymethyltransferase (EC 2.1.2.1)";"Serine hydroxymethyltransferase (EC 2.1.2.1)";"Serine hydroxymethyltransferase (EC 2.1.2.1)"	0.5556	47	15	0.3651	23	13	0.6627	64	13	0.877029	0.0482483	1.13891	0.964945	0.506999	1.1204	0.887134	2.86062e-07	1.02589	1.34365	9.09021e-05	1.1241	1.25838	0.000364775	1.10756	1.27652	1.50166e-06	1.06275	1.07256	0.285	1.14471	0.887788	0.00149182	1.06542	0.747314	0.345184	1.90769	1.12147	0.014381	1.09204	1.30519	0.000687715	1.13663	0.978337	0.893131	1.41591	1.26892
ENSMUSP00000049112	ENSMUSG00000032212	Sltm	Q8CH25 "SAFB-like transcription modulator (SAF-like transcription modulator)(Modulator of estrogen-induced transcription)"	0.3375	67	15	0.323	46	18	0.5286	109	9	0.730113	0.0104785	1.25667	0.930708	0.621677	1.35183	0.918357	0.0078456	1.05738	0.715383	0.0397815	1.37294	0.928263	0.105621	1.09626	0.946231	0.0115421	1.03988	0.743635	0.0763695	1.39383	0.98785	0.795203	1.10277	1.02486	0.934128	1.94232	0.818514	0.156378	1.33314	1.03184	0.806351	1.30417	0.996474	0.982041	1.42017	0.943502
ENSMUSP00000073018	ENSMUSG00000039218	Srrm2	Q8BTI8 "Serine/arginine repetitive matrix protein 2 "	0.2801	96	15	0.2464	88	19	0.609	244	19	0.827116	0.0313163	1.18551	0.856412	0.0153184	1.12926	0.863992	0.00257791	1.09182	0.920559	0.434784	1.24708	1.26562	0.00542722	1.1696	1.01851	0.509888	1.05899	1.30582	0.0523094	1.30985	1.11497	0.0939171	1.13802	0.739257	0.0547632	1.36204	0.948117	0.531526	1.19498	0.921323	0.119538	1.11109	0.833125	0.0380565	1.18691	1.02944
ENSMUSP00000023788	ENSMUSG00000058354	Krt6a	P50446 "Keratin, type II cytoskeletal 6A (Cytokeratin-6A)(CK-6A)(Keratin-6A)(K6A)(Keratin-6-alpha)(mK6-alpha)"	0.3653	48	4							1.68512	0.0956096	1.99567							0.862858	0.26711	1.51685							0.753049	0.0598295	1.35732							0.735603	0.0741631	1.43719							0.897741
ENSMUSP00000107910	ENSMUSG00000038252	Ncapd2	Q8K2Z4 "Condensin complex subunit 1 (Non-SMC condensin I complex subunit D2)(Chromosome condensation-related SMC-associated protein 1)(Chromosome-associated protein D2)(mCAP-D2)(XCAP-D2 homolog)"	0.3319	106	18							0.852293	0.045373	1.169							0.826283	0.0541799	1.21491							0.715717	0.00253578	1.21946							0.814072	0.0297149	1.20072							0.799645
ENSMUSP00000102675	ENSMUSG00000020929	Eftud2	O08810 "116 kDa U5 small nuclear ribonucleoprotein component (U5 snRNP-specific protein, 116 kDa)(U5-116 kDa)(Elongation factor Tu GTP-binding domain-containing protein 2)"	0.3409	63	16	0.3687	49	21	0.5901	80	19	0.933628	0.540173	1.26297	0.93869	0.427661	1.17704	0.977549	0.469474	1.06669	0.944954	0.677607	1.32921	1.10936	0.200847	1.17782	0.962724	0.423136	1.10227	1.05775	0.697125	1.35195	1.02754	0.428515	1.07264	1.14564	0.576464	1.65224	0.958176	0.741648	1.31141	0.92425	0.241045	1.14568	1.00391	0.971712	1.25602	0.985617
ENSMUSP00000032143	ENSMUSG00000030062	Rpn1	Q91YQ5 "Dolichyl-diphosphooligosaccharide--protein glycosyltransferase subunit 1 Precursor (EC 2.4.1.119)(Dolichyl-diphosphooligosaccharide--protein glycosyltransferase 67 kDa subunit)(Ribophorin-1)(Ribophorin I)(RPN-I)"	0.4605	46	13	0.3766	32	12	0.523	50	15	1.33956	0.000553651	1.14658	1.3319	0.00136722	1.16004	1.2446	1.07924e-10	1.02824	1.04689	0.52086	1.16294	0.982697	0.701137	1.10243	1.18388	0.000228061	1.07645	0.90103	0.580537	1.49158	1.12163	0.0180957	1.09535	1.12862	0.160841	1.19158	1.16637	0.0588021	1.17423	1.26165	0.000614854	1.1141	1.1388	0.00664715	1.09156	1.28596
ENSMUSP00000079538	ENSMUSG00000063785	Utp14a	Q640M1 "U3 small nucleolar RNA-associated protein 14 homolog A (Juvenile spermatogonial depletion-like X-linked protein)(Jsd-like X-linked protein)"	0.4316	56	17	0.339	35	13	0.3103	44	8	0.93842	0.484884	1.20818	0.933546	0.379382	1.17842	0.913314	0.0114236	1.06365	0.952038	0.612296	1.22429	0.993637	0.790179	1.05245	0.8536	0.000861914	1.06523	0.976986	0.845546	1.28445	0.997867	0.949679	1.07486	0.959868	0.844819	1.61107	1.0274	0.811496	1.26782	1.01322	0.848118	1.15751	0.969854	0.864335	1.50445	1.21533
ENSMUSP00000002121	ENSMUSG00000002052	Supt6h	Q62383 "Transcription elongation factor SPT6 "	0.2549	91	17	0.1448	33	11	0.3001	101	7	0.967703	0.64546	1.16001	0.990253	0.881251	1.15508	1.0193	0.448862	1.05945	0.985178	0.745605	1.10065	1.01346	0.50502	1.04451	1.01693	0.616194	1.08087	0.991765	0.87075	1.11186	1.04144	0.245576	1.07674	1.31088	0.0562855	1.32403	0.985709	0.775192	1.11077	0.955545	0.3124	1.10089	1.0409	0.533239	1.16002	0.971885
ENSMUSP00000108312	ENSMUSG00000036202	Rif1	Q6PR54 "Telomere-associated protein RIF1 (Rap1-interacting factor 1 homolog)(mRif1)"	0.1952	108	16				0.2938	113	18	0.869798	0.00993006	1.10601				0.933244	4.46345e-05	1.02719	0.841424	0.00524258	1.11937				0.780084	5.89415e-09	1.05031	0.876737	0.00153576	1.07529				0.925018	0.378158	1.1993	0.821971	2.3843e-06	1.05844				0.787234	5.51234e-06	1.08084	0.905205
ENSMUSP00000094405	ENSMUSG00000063550	Nup98	Q4FZE7;Q68G59 "Nup98 protein Fragment ";"Nup98 protein Fragment "	0.3078	69	7	0.2367	39	10	0.3935	67	10	1.142	0.46309	1.51384	1.12288	0.39685	1.34273	1.12234	0.002765	1.06611	0.984611	0.935709	1.57022	0.967633	0.62037	1.15616	0.93413	0.0424316	1.06742	1.08747	0.641136	1.51932	1.0276	0.711764	1.17525	0.960664	0.747447	1.31439	1.03218	0.880607	1.63975	1.01155	0.884961	1.19068	0.888034	0.0450283	1.1224	1.18379
ENSMUSP00000027421	ENSMUSG00000026219	Trip12	O88380;Q3TP48;Q3TY88;Q3UYT5;Q8BM59;Q8K051 "Cbp37 Fragment ";"Putative uncharacterized protein Fragment ";"Putative uncharacterized protein Fragment ";"Putative uncharacterized protein Fragment ";"Putative uncharacterized protein Fragment ";"Trip12 protein Fragment "	0.2143	86	15	0.1417	42	10	0.3541	114	10	1.32716	0.0049703	1.20009	1.36758	0.00273404	1.18923	1.34917	0.000430543	1.13355	0.89304	0.248924	1.22438	1.00656	0.867582	1.09006	0.948162	0.00448134	1.03254	1.12972	0.221594	1.22777	1.13344	0.477183	1.46522	1.09215	0.482945	1.31325	0.968897	0.733946	1.21718	1.03909	0.512408	1.13563	1.10164	0.0533563	1.10354	0.670747
ENSMUSP00000071163	ENSMUSG00000040945	Rcc2	Q8BK67 "Protein RCC2 "	0.4558	46	14	0.4404	40	13	0.775	73	15	0.949938	0.782165	1.48139	0.85485	0.40615	1.48725	0.987948	0.732446	1.07742	1.01771	0.929891	1.52607	0.98936	0.855479	1.13343	0.972708	0.425492	1.07499	0.718951	0.0448996	1.37876	0.612646	0.1271	1.91805	0.954082	0.841507	1.6404	0.984512	0.935723	1.50691	0.905907	0.493359	1.35632	1.14224	0.282155	1.2905	0.968926
ENSMUSP00000027768	ENSMUSG00000026491	Ahctf1	Q8CJF7 "Protein ELYS (Protein MEL-28)(Putative AT-hook-containing transcription factor 1)(Embryonic large molecule derived from yolk sac)"	0.2269	90	16	0.169	50	14	0.2711	100	14	1.15774	0.100882	1.19549	0.99652	0.933585	1.09266	1.16304	0.000106406	1.06139	1.00808	0.911683	1.16414	0.958678	0.114129	1.05529	0.943076	0.0151306	1.04631	1.16997	0.0663074	1.18402	1.01904	0.220094	1.03213	0.955481	0.63868	1.22705	1.15837	0.082152	1.18341	0.994818	0.880864	1.07619	0.978467	0.613378	1.09508	1.07822
ENSMUSP00000001724	ENSMUSG00000001674	Ddx18	Q8K363 "ATP-dependent RNA helicase DDX18 (EC 3.6.1.-)(DEAD box protein 18)"	0.4015	59	11	0.4167	41	16	0.6939	66	10	1.28539	0.0229084	1.23165	1.14933	0.0845583	1.17419	1.10573	0.00548256	1.06463	1.05652	0.61434	1.2656	0.930583	0.070201	1.08182	0.817005	0.0322679	1.19811	1.26803	0.0848852	1.31874	0.947043	0.206989	1.0919	0.519351	0.0428705	1.87572	1.3297	0.0380844	1.30455	1.1991	0.0133631	1.14799	0.940393	0.734851	1.48871	1.2774
ENSMUSP00000030164	ENSMUSG00000028452	Vcp	Q01853 "Transitional endoplasmic reticulum ATPase (TER ATPase)(15S Mg(2+)-ATPase p97 subunit)(Valosin-containing protein)(VCP)"	0.3821	58	15	0.2717	30	11	0.5794	76	16	1.38247	0.00211049	1.20292	1.27458	0.00627712	1.16988	1.41323	1.14984e-07	1.08174	1.16643	0.098274	1.20494	1.06372	0.0167309	1.04916	1.26614	7.07427e-05	1.09719	1.27905	0.0470628	1.27439	1.19464	0.000813469	1.08753	1.23198	0.206918	1.40077	1.07607	0.31771	1.16391	1.11399	0.0476676	1.11248	1.50818	2.25599e-07	1.10336	1.09426
ENSMUSP00000032179	ENSMUSG00000030091	Nup210	Q9QY81 "Nuclear pore membrane glycoprotein 210 Precursor (Nuclear pore protein gp210)(Nuclear envelope pore membrane protein POM 210)(POM210)(Pore membrane protein of 210 kDa)(Nucleoporin Nup210)"	0.2174	71	15	0.1978	45	18	0.3494	99	20	1.23019	0.0470465	1.22629	1.37488	1.80759e-05	1.12096	1.20063	4.11304e-07	1.05218	0.945983	0.534958	1.20707	1.05707	0.307335	1.11804	1.03042	0.501332	1.0958	0.954195	0.535906	1.17388	0.875096	0.000360616	1.06549	0.927096	0.616964	1.36558	1.09686	0.31774	1.21191	1.0895	0.0415668	1.08551	0.884488	0.191454	1.20884	0.998874
ENSMUSP00000075401	ENSMUSG00000017264	Exosc10	B2KFR0;Q3TRD0;Q8K366;Q9R0B0 "Exosome component 10 ";"Putative uncharacterized protein Fragment ";"Exosc10 proteinExosome component 10 ;";"P100 polymyositis-scleroderma overlap syndrome associated autoantigen homolog Fragment "	0.3503	55	17	0.1903	26	10	0.3157	59	5	0.980014	0.803941	1.18479	0.865095	0.219989	1.28231	0.973803	0.00719738	1.01468	1.06133	0.427841	1.1678	1.02092	0.623367	1.09649	0.978374	0.791421	1.23946	0.958036	0.597785	1.18393	0.919184	0.39128	1.23573	1.08626	0.554805	1.42875	0.973519	0.67899	1.14452	0.936655	0.403912	1.18414	1.00196	0.981639	1.24906	1.02304
ENSMUSP00000048084	ENSMUSG00000039509	Nup133	Q8R0G9 "Nuclear pore complex protein Nup133 (Nucleoporin Nup133)(133 kDa nucleoporin)"	0.2762	63	16	0.2087	34	15	0.4623	75	16	0.990377	0.878089	1.14118	0.945358	0.533572	1.20783	1.05503	0.0799936	1.06268	0.905307	0.301203	1.21894	0.981275	0.446018	1.05307	0.981252	0.557775	1.06959	0.977118	0.787361	1.19791	0.982559	0.81116	1.16766	1.10465	0.495159	1.35441	0.930876	0.462543	1.22556	0.97746	0.656817	1.11374	0.977111	0.80538	1.21744	0.91831
ENSMUSP00000015320	ENSMUSG00000015176	Nolc1	Q3TKZ9;Q3U6W2;Q3UBB6;Q3UI16;Q6ZQK6;Q8CE21 "Putative uncharacterized protein ";"Putative uncharacterized protein ";"Putative uncharacterized protein ";"Putative uncharacterized protein ";"MKIAA0035 protein Fragment ";"Putative uncharacterized protein "	0.3433	45	13	0.3718	52	17	0.443	56	8	0.79183	0.0154933	1.19773	0.746113	0.000478194	1.15275	0.846135	0.000170969	1.05607	0.890058	0.213366	1.21303	1.21031	7.36687e-05	1.07954	0.893549	0.100211	1.15097	1.40275	0.0161346	1.30168	1.10514	0.00351836	1.06395	0.909177	0.725802	1.85286	0.945278	0.575537	1.23745	0.809709	0.00377983	1.14135	0.896375	0.0746385	1.13158	1.31531
ENSMUSP00000027174	ENSMUSG00000026020	Nop58	Q6DFW4 "Nucleolar protein 58 (Nucleolar protein 5)(SIK-similar protein)(MSSP)"	0.5224	54	14	0.5336	40	19	0.6045	69	14	1.009	0.924807	1.22459	0.928653	0.594826	1.33271	0.976027	0.332547	1.05346	0.945449	0.57634	1.23716	1.02009	0.353074	1.04481	0.884915	0.0032409	1.07615	0.830779	0.375451	1.55094	0.950481	0.450981	1.14853	1.00777	0.971167	1.57417	1.0591	0.6163	1.27535	0.957879	0.72582	1.28894	1.0909	0.573169	1.38426	1.08046
ENSMUSP00000094515	ENSMUSG00000071659	Hnrnpul2	Q00PI9 "Heterogeneous nuclear ribonucleoprotein U-like protein 2 (MLF1-associated nuclear protein)"	0.2953	49	12	0.3866	45	18	0.5356	65	14	0.70431	0.000107143	1.14037	0.717164	0.0294012	1.3431	0.712713	7.25142e-08	1.07003	0.845819	0.105686	1.23256	1.00221	0.966301	1.11465	1.01973	0.604508	1.08274	1.00364	0.961669	1.17674	0.929026	0.269031	1.14562	1.16199	0.666382	2.08584	0.830151	0.0358638	1.18667	0.795572	0.0808703	1.29692	0.903417	0.566858	1.45261	0.975025
ENSMUSP00000028683	ENSMUSG00000027248	Pdia3	P27773 "Protein disulfide-isomerase A3 Precursor (EC 5.3.4.1)(Disulfide isomerase ER-60)(Endoplasmic reticulum resident protein 60)(ER protein 60)(ERp60)(Endoplasmic reticulum resident protein 57)(ER protein 57)(ERp57)(58 kDa microsomal protein)(p58)(58 kDa /.../se-regulated protein)"	0.4178	42	13	0.3723	26	13	0.4871	37	10	2.2858	0.000343458	1.44028	1.71715	6.24786e-06	1.16744	1.69237	3.85656e-06	1.1276	1.49515	0.0655071	1.54103	1.09252	0.054053	1.0945	1.13512	0.00332006	1.07514	1.80959	0.0103366	1.53048	1.21593	0.131814	1.3014	1.67959	0.00103347	1.27961	1.71959	0.0174318	1.53527	1.36894	0.00017595	1.13667	1.4155	0.000570975	1.16349	1.62896
ENSMUSP00000052020	ENSMUSG00000025278	Flnb	Q80X90 "Filamin-B (FLN-B)(Beta-filamin)(Actin-binding-like protein)(ABP-280-like protein)"	0.1995	90	15	0.1122	40	9	0.3394	122	11	0.623216	0.00122069	1.27765	0.514766	0.000133088	1.25114	0.36107	2.08075e-05	1.35381	1.28596	0.000512544	1.12778	0.920824	0.0392186	1.08034	1.27894	2.13616e-06	1.05825	0.95287	0.599203	1.21236	1.11125	0.0229663	1.09054	0.791384	0.161939	1.41226	1.23874	0.00280684	1.13541	1.13457	0.00322347	1.07273	0.62578	0.00231512	1.29399	0.867529
ENSMUSP00000057291	ENSMUSG00000062075	Lmnb2	P21619 "Lamin-B2 "	0.5201	53	14	0.406	26	14	0.6258	63	10	0.84887	0.00289212	1.10158	0.798792	0.00810747	1.1682	0.809174	3.50168e-06	1.04893	1.00988	0.821551	1.09666	0.928254	0.116429	1.10033	1.00555	0.742367	1.03763	0.921815	0.385546	1.21633	0.919683	0.128397	1.11781	1.19203	0.0807405	1.22386	0.91421	0.076587	1.10597	0.831366	0.0129687	1.14873	0.923728	0.101584	1.10344	1.03688
ENSMUSP00000078602	ENSMUSG00000032407	2610101N10Rik	Q6NV83 "U2-associated protein SR140 (140 kDa Ser/Arg-rich domain protein)"	0.3129	67	15	0.3149	40	14	0.3314	66	8	0.970713	0.761122	1.22835	0.89832	0.223037	1.19841	0.873015	0.00541443	1.08433	0.875778	0.210906	1.24234	1.06833	0.110042	1.0868	0.924578	0.400257	1.2301	1.17746	0.157368	1.26433	1.06256	0.0998794	1.07679	0.937334	0.739174	1.55544	0.954593	0.694771	1.28253	0.884372	0.0693618	1.1435	0.954625	0.407692	1.13281	1.04351
ENSMUSP00000027579	ENSMUSG00000026341	Actr3	Q99JY9 "Actin-related protein 3 (Actin-like protein 3)"	0.4641	39	13	0.3373	23	8	0.634	48	9	1.18515	0.339526	1.45081	1.22963	0.173514	1.38081	0.911704	0.00901081	1.0642	0.970376	0.866916	1.46629	0.654795	0.00126368	1.21272	0.912304	0.128441	1.13296	0.822541	0.216107	1.38541	0.938863	0.19366	1.10935	0.744344	0.235779	1.70085	1.19394	0.311142	1.4409	1.17914	0.203173	1.31999	0.923451	0.467271	1.27206	0.930936
ENSMUSP00000098096	ENSMUSG00000002524	Puf60	Q3UEB3 "Poly(U)-binding-splicing factor PUF60 (60 kDa poly(U)-binding-splicing factor)"	0.3912	38	14	0.4936	36	15	0.6837	50	7	1.12979	0.263299	1.25286	0.939557	0.500175	1.21315	0.973952	0.366548	1.06838	1.13231	0.238966	1.24292	1.01456	0.517533	1.04782	1.02107	0.601273	1.09697	1.20192	0.11969	1.26936	0.976542	0.56025	1.08908	0.991131	0.960599	1.52695	1.18447	0.154668	1.27489	0.945936	0.454156	1.16749	1.03068	0.711051	1.20967	1.20643
ENSMUSP00000021670	ENSMUSG00000021244	Ylpm1	201 "YLP motif containing 1 Gene [Source:MGI Symbol;Acc:MGI:1926195]" "MGI_automatic_transcript"	0.1937	72	7	0.1185	32	7	0.3488	112	5	0.89102	0.369842	1.33817	0.972203	0.875575	1.52531	1.11958	0.0198967	1.08714	0.916173	0.587792	1.45386	0.935399	0.685341	1.46829	1.11293	0.138193	1.17429	0.676055	0.108437	1.6624	0.912165	0.609163	1.51774	1.18622	0.274445	1.45448	0.859657	0.220512	1.31078	0.830026	0.330125	1.53764	1.14158	0.427723	1.51723	0.996396
ENSMUSP00000037613	ENSMUSG00000046865	Fbl	P35550 "rRNA 2'-O-methyltransferase fibrillarin (EC 2.1.1.-)(Nucleolar protein 1)"	0.6697	54	10	0.7064	53	12	0.8349	74	14	1.12163	0.450578	1.38988	0.964183	0.84397	1.4894	0.948255	0.124358	1.07235	1.03524	0.843115	1.46901	1.02384	0.719004	1.1508	0.854335	0.0233911	1.1416	1.14811	0.502408	1.56387	0.926512	0.485987	1.26242	0.883846	0.657823	1.80107	1.14376	0.448557	1.46738	0.960799	0.802488	1.40985	1.02915	0.865145	1.43086	1.28458
ENSMUSP00000044677	ENSMUSG00000037475	BC005561	B1AZI6 "THO complex subunit 2 (Tho2)"	0.2089	68	14	0.1512	34	9	0.2923	83	17	0.822168	0.100944	1.2707	0.853103	0.175617	1.27962	0.849958	1.09878e-09	1.02789	0.744293	0.0194308	1.27038	0.917261	0.00120164	1.04153	0.887338	8.30869e-05	1.04968	0.781869	0.0691631	1.30776	0.802037	0.00461111	1.13972	0.983754	0.901882	1.31947	0.76551	0.0380619	1.28407	0.812373	0.0161548	1.17095	0.979248	0.784369	1.17323	0.796186
ENSMUSP00000074160	ENSMUSG00000063511	Snrnp70	Q62376 "U1 small nuclear ribonucleoprotein 70 kDa (U1 snRNP 70 kDa)(snRNP70)(U1-70K)"	0.442	41	14	0.4531	33	12	0.7299	58	9	0.965359	0.845229	1.46578	1.01102	0.882028	1.17208	0.896447	0.300193	1.25556	0.892812	0.470879	1.39062	0.983902	0.457877	1.04752	1.09951	0.466263	1.33106	0.957327	0.81357	1.47906	0.9591	0.75255	1.32886	1.38327	0.0533563	1.39154	0.980677	0.91372	1.46447	0.963778	0.617306	1.17109	1.09695	0.498561	1.35123	1.06397
ENSMUSP00000003450	ENSMUSG00000003360	Ddx23	NP_001074450.1 "DEAD (Asp-Glu-Ala-Asp) box polypeptide 23 "	0.3822	68	16	0.265	30	13	0.4212	73	9	1.13837	0.312174	1.30219	0.791059	0.000244839	1.10446	0.813345	0.00029544	1.08149	1.01996	0.879487	1.31393	1.10405	0.00152754	1.0543	0.971293	0.437457	1.08566	1.18228	0.272298	1.36765	1.05574	0.0987931	1.06828	1.05045	0.836246	1.7015	1.05209	0.693947	1.30959	0.782837	3.44582e-06	1.06835	0.843023	0.0774591	1.21466	1.1067
ENSMUSP00000105553	ENSMUSG00000054150	4831426I19Rik	Q4FZC9 "Nesprin-3 "	0.2841	65	16	0.2615	42	15	0.4574	78	12	1.11132	0.0337318	1.10097	1.05749	0.195668	1.09224	1.00528	0.833152	1.05524	1.06878	0.120786	1.09021	1.21557	2.39791e-06	1.05648	1.08118	0.0200874	1.0653	1.16742	0.00199999	1.09163	1.24535	2.721e-06	1.06443	1.29607	0.00223985	1.15511	1.31004	0.000510987	1.13778	1.2388	0.000219901	1.09757	1.20235	0.000517118	1.08737	1.31519
ENSMUSP00000112164	ENSMUSG00000036180	Gatad2a	Q8CHY6 "Transcriptional repressor p66 alpha (GATA zinc finger domain-containing protein 2A)"	0.4175	45	14	0.3905	41	15	0.5286	49	14	0.883455	0.0447315	1.12807	0.773344	0.00135721	1.14841	0.840606	2.97353e-06	1.0493	1.07035	0.111268	1.08974	1.08891	0.146729	1.12627	1.02015	0.605964	1.08492	1.11286	0.121199	1.14946	1.04132	0.371735	1.09868	1.07562	0.463948	1.23203	1.01312	0.679598	1.06891	0.903181	0.0459449	1.10488	0.934521	0.0843327	1.08141	1.21117
ENSMUSP00000095040	ENSMUSG00000052397	Ezr	Q8CBU4 "Putative uncharacterized protein Fragment "	0.5222	79	14	0.4462	47	14	0.7368	86	11	1.13597	0.135675	1.189	1.20484	0.00152837	1.10603	0.978074	0.389089	1.05639	0.987816	0.871733	1.17444	0.92741	0.0636315	1.0836	1.08002	0.00748541	1.05269	1.02459	0.819459	1.25266	1.13301	0.074014	1.14893	1.27841	0.00526877	1.16667	1.02583	0.80413	1.24308	1.01591	0.708483	1.09329	0.993462	0.83727	1.07179	1.29022
ENSMUSP00000114717	ENSMUSG00000039929	Urb1	NP_083773.1 "nucleolar pre-ribosomal-associated protein 1 "	0.2178	112	14	0.1493	50	14	0.3035	107	12	0.966913	0.544633	1.12392	1.02058	0.530343	1.07065	1.07595	0.00580446	1.04836	0.97877	0.689037	1.11993	1.07514	0.0321194	1.0674	0.883767	0.0446834	1.12756	0.946443	0.566231	1.22386	1.05819	0.124819	1.0773	0.962297	0.70367	1.24191	0.978429	0.735759	1.14638	0.986836	0.752451	1.09292	0.919328	0.232464	1.15777	0.948448
ENSMUSP00000001566	ENSMUSG00000001525	Tubb5	P99024 "Tubulin beta-5 chain "	0.4257	49	4	0.4932	42	3	0.7275	77	3	1.21921	0.248406	1.55492	1.69655	0.0149097	1.3243	1.2271	0.0186795	1.12984	1.18027	0.177381	1.35036	0.959047	0.137931	1.07766	1.10253	0.0858356	1.14075	1.20778	0.112671	1.31018	1.14216	0.0613153	1.16014	1.22971	0.349272	2.08372	1.2192	0.0881042	1.2876	1.48798	0.0282737	1.34154	1.20912	0.196528	1.53437	1.08449
ENSMUSP00000113454	ENSMUSG00000034160	Ogt	Q80XU6 "Ogt protein "	0.2799	55	15	0.2094	34	12	0.3604	50	9	0.965347	0.636469	1.1695	0.99037	0.828816	1.10096	0.808258	4.23432e-06	1.04576	1.05754	0.517111	1.19788	1.08543	0.0845218	1.09983	1.01046	0.88852	1.18043	0.981765	0.81923	1.18472	0.987206	0.806628	1.11966	0.723078	0.150126	1.59961	1.01508	0.859418	1.19477	1.05968	0.0330469	1.05377	0.855437	0.125958	1.23463	1.05602
ENSMUSP00000105174	ENSMUSG00000032939	Nup93	Q8BJ71 "Nuclear pore complex protein Nup93 (Nucleoporin Nup93)(93 kDa nucleoporin)(CBP-interacting protein 4)"	0.3236	64	13	0.4066	44	24	0.7143	87	21	1.08028	0.461155	1.24732	0.915434	0.313824	1.19426	0.891992	0.00401803	1.07614	1.04886	0.654339	1.25407	1.02817	0.679352	1.14716	0.911963	0.0295431	1.08549	1.10667	0.397908	1.2887	0.939944	0.298692	1.12808	1.0976	0.485072	1.314	1.0868	0.455107	1.26487	0.89661	0.111034	1.14596	0.933384	0.417457	1.18968	1.17061
ENSMUSP00000119126	ENSMUSG00000027593	C130057N11Rik	A2AU62 "HnRNP-associated with lethal yellow Fragment "	0.5878	35	12	0.6892	37	14	0.6723	47	10	1.26816	0.00146113	1.13225	1.09315	0.0162939	1.07225	1.14754	0.00141236	1.07102	1.17755	0.0495089	1.17706	1.12188	0.0902775	1.1454	1.06268	0.478933	1.20461	1.18824	0.055422	1.19391	1.02318	0.38427	1.05651	1.14106	0.0920514	1.17157	1.04575	0.533265	1.1654	0.958017	0.142896	1.06121	1.01916	0.708298	1.11754	1.13069
ENSMUSP00000092849	ENSMUSG00000071054	CT485788.3	CT485788.3 NP_001156772.1 "scaffold attachment factor B "	0.2366	49	9	0.3391	47	11	0.5976	94	10	1.01365	0.943102	1.52873	1.00787	0.964465	1.46587	1.0177	0.866256	1.25735	0.926957	0.627267	1.41403	0.970777	0.367934	1.07259	1.06727	0.310191	1.14676	1.03852	0.795438	1.38422	0.989421	0.837565	1.11919	1.24684	0.144433	1.36645	1.04548	0.777919	1.42135	1.11326	0.533811	1.44911	1.06969	0.505469	1.24572	1.07609
ENSMUSP00000020315	ENSMUSG00000020114	Cand1	Q6ZQ38 "Cullin-associated NEDD8-dissociated protein 1 (Cullin-associated and neddylation-dissociated protein 1)(p120 CAND1)"	0.2927	86	15	0.2122	31	17	0.4333	102	24	1.03828	0.855467	1.54385	1.22458	0.0742764	1.25221	1.32497	8.37074e-11	1.05327	0.755733	0.148418	1.48108	0.819314	1.02554e-07	1.0476	0.975713	0.157835	1.03546	0.692673	0.0892717	1.53938	0.833244	0.000146093	1.08134	1.26615	0.0160543	1.20668	0.833187	0.399411	1.56891	0.939736	0.421991	1.17339	1.17697	0.000571314	1.08808	0.77073
ENSMUSP00000022742	ENSMUSG00000022142	Nup155	Q99P88 "Nuclear pore complex protein Nup155 (Nucleoporin Nup155)(155 kDa nucleoporin)"	0.2358	80	13	0.3063	58	20	0.4853	101	20	0.915653	0.377005	1.23281	0.928175	0.158963	1.11227	0.964512	0.238633	1.06413	0.857033	0.0938966	1.20296	1.00204	0.931336	1.05003	0.915089	0.000293282	1.0429	0.869582	0.0283507	1.12999	0.983347	0.64036	1.07684	0.938041	0.579234	1.26781	0.868684	0.144264	1.21699	0.937408	0.097643	1.08075	0.898501	0.0471133	1.11128	0.855857
ENSMUSP00000033580	ENSMUSG00000031229	Atrx	A6PWK9;A6PWL2;Q3TP53;Q3TSV4;Q3UU22;Q3UZ76;Q8C2S3;Q8C4Z6 "Alpha thalassemia/mental retardation syndrome X-linked homolog (Human) Fragment ";"Alpha thalassemia/mental retardation syndrome X-linked homolog (Human) Fragment ";"Putative uncharacterized protein Fragment ";"Putative uncharacterized protein Fragment ";"Putative uncharacterized protein Fragment ";"Putative uncharacterized protein Fragment…	0.1971	103	15	0.1401	50	15	0.2674	109	6	0.792373	5.47676e-05	1.09151	0.74351	0.00278489	1.19197	0.765851	0.113846	1.43103	0.925304	0.167008	1.12102	0.945302	0.0115268	1.04241	0.967756	0.843915	1.50138	0.883327	0.00967571	1.09297	0.853099	0.000236757	1.07211	0.889837	0.329342	1.33907	0.764806	0.000714696	1.14264	0.722913	0.000321297	1.15845	0.804675	0.0367991	1.21608	0.918743
ENSMUSP00000044898	ENSMUSG00000033228	Sfrs2ip	Q7TML8;Q810T0;Q9CSS1 "Sfrs2ip protein Fragment ";"Sfrs2ip protein Fragment ";"Putative uncharacterized protein Fragment "	0.215	52	13				0.3029	69	7	0.37376	0.0118917	2.06299				0.921889	0.159511	1.13197	0.404807	0.0247857	2.15618				0.965193	0.269982	1.07395	0.402436	0.0241662	2.15805				1.20137	0.0388532	1.18582	0.411788	0.0330162	2.23173				0.987201	0.857629	1.18332	0.425904
ENSMUSP00000021807	ENSMUSG00000021377	Dek	Q7TNV0 "Protein DEK "	0.5105	46	11	0.4921	47	13	0.5868	43	10	0.926845	0.630827	1.407	0.849059	0.0347184	1.16156	0.820499	0.000135449	1.07321	0.944545	0.743289	1.45864	0.916367	0.000259437	1.03798	0.833655	0.000306562	1.07531	0.874867	0.46229	1.47647	0.813886	3.48884e-05	1.07283	0.84207	0.530342	1.81452	0.970813	0.864922	1.45952	0.810639	0.00496999	1.14259	0.835361	0.178838	1.32193	1.02561
ENSMUSP00000030138	ENSMUSG00000028430	Nol6	Q8R5K4 "Nucleolar protein 6 (Nucleolar RNA-associated protein)(Nrap)"	0.3047	70	15	0.2552	30	9	0.4653	90	14	1.21077	0.258873	1.41706	1.15282	0.161155	1.23663	1.16168	0.0135971	1.12018	0.949787	0.761542	1.43199	1.08526	0.36579	1.2175	0.877476	0.068984	1.15306	1.01803	0.920727	1.46291	0.988492	0.763624	1.08956	1.15464	0.33604	1.36467	1.02163	0.912734	1.51224	0.96456	0.37757	1.09316	1.08863	0.308981	1.18917	1.12491
ENSMUSP00000117987	ENSMUSG00000071866	Ppia	Q3TE63;Q3UAJ1;Q5SVY2;Q9CZK9 "Peptidyl-prolyl cis-trans isomerase (EC 5.2.1.8)";"Peptidyl-prolyl cis-trans isomerase (EC 5.2.1.8)";"Peptidyl-prolyl cis-trans isomerase (EC 5.2.1.8)";"Peptidyl-prolyl cis-trans isomerase (EC 5.2.1.8)"	0.8049	43	8	0.8049	49	8	0.9024	79	6	1.05089	0.890752	2.27998	0.922777	0.881173	3.40764	1.04025	0.679841	1.26083	0.931201	0.868139	2.66141	0.612258	0.00627494	1.35148	0.975677	0.70339	1.16996	0.968623	0.939783	2.61943	0.799081	0.0746514	1.28847	0.963034	0.883614	1.87523	1.10088	0.824272	2.68047	0.858099	0.72115	2.64812	0.727265	0.00981411	1.22398	0.946635
ENSMUSP00000026122	ENSMUSG00000025130	P4hb	P09103 "Protein disulfide-isomerase Precursor (PDI)(EC 5.3.4.1)(Prolyl 4-hydroxylase subunit beta)(Cellular thyroid hormone-binding protein)(p55)(Endoplasmic reticulum resident protein 59)(ER protein 59)(ERp59)"	0.4813	38	13	0.5049	37	16	0.4892	41	4	1.42436	0.0780493	1.49193	1.58714	0.000118809	1.21067	0.933748	0.081729	1.0882	1.18779	0.42086	1.56819	1.12772	0.00273243	1.07416	1.31613	0.0024943	1.09667	1.33951	0.250075	1.6938	1.12804	0.189877	1.20559	1.14866	0.223981	1.33461	1.13951	0.550901	1.59	1.18423	0.0424619	1.17645	0.939084	0.452854	1.26168	1.1912
ENSMUSP00000020630	ENSMUSG00000020361	Hspa4	Q61316 "Heat shock 70 kDa protein 4 (Heat shock 70-related protein APG-2)"	0.3076	55	15	0.2257	24	8	0.3397	39	9	0.878829	0.1015	1.17125	0.990244	0.863144	1.13844	1.0082	0.569554	1.03225	0.864244	0.0253908	1.13327	0.705634	5.00107e-06	1.06855	0.984249	0.499929	1.05318	0.994728	0.937333	1.15217	0.927211	0.0378411	1.07247	1.06909	0.198416	1.11612	0.977785	0.74665	1.15748	1.06526	0.433338	1.19707	1.06248	0.110736	1.08106	0.896619
ENSMUSP00000105321	ENSMUSG00000021595	Nsun2	Q1HFZ0 "tRNA (cytosine-5-)-methyltransferase NSUN2 (EC 2.1.1.29)(NOL1/NOP2/Sun domain family member 2)(Myc-induced SUN domain-containing protein)"	0.3672	50	14	0.4637	44	22	0.6407	69	18	1.1139	0.181967	1.17966	1.24756	0.0116983	1.18129	1.43591	1.00634e-07	1.09084	0.987081	0.8945	1.23085	1.12056	0.0222562	1.10068	1.00879	0.860645	1.10918	1.04584	0.485077	1.1452	1.00743	0.889142	1.11528	1.19573	0.193829	1.32155	1.13435	0.209197	1.22886	1.18289	0.0101764	1.13171	1.16707	0.00706869	1.11237	1.13039
ENSMUSP00000031383	ENSMUSG00000029430	Ran	P62827 "GTP-binding nuclear protein Ran (GTPase Ran)(Ras-related nuclear protein)(Ras-like protein TC4)"	0.4769	35	10	0.7454	17	8	0.8287	38	8	1.14659	0.0616912	1.15609	0.98304	0.93384	1.60024	1.23045	0.00172208	1.10492	1.07047	0.385757	1.18409	0.897353	0.0159039	1.0844	1.05108	0.241194	1.09639	0.977213	0.803704	1.22589	0.839063	0.0378822	1.17643	0.767149	0.368994	1.92123	1.02894	0.723161	1.19312	0.969296	0.885975	1.64205	0.882378	0.566357	1.63536	1.06891
ENSMUSP00000024885	ENSMUSG00000024081	Cebpz	P53569 "CCAAT/enhancer-binding protein zeta (CCAAT-box-binding transcription factor)(CCAAT-binding factor)(CBF)"	0.25	64	13	0.2091	32	13	0.3783	66	9	1.02523	0.878611	1.41623	1.0275	0.809483	1.271	1.14222	0.00692629	1.08877	0.939849	0.659878	1.34929	0.922443	0.145605	1.11967	0.832938	0.0103223	1.13477	0.990273	0.949515	1.39016	0.917636	0.554987	1.36127	0.900529	0.766705	2.19694	0.981836	0.908363	1.40464	0.991674	0.904615	1.16051	0.978129	0.884221	1.40384	1.05366
ENSMUSP00000022507	ENSMUSG00000021938	Pspc1	Q8R326 "Paraspeckle component 1 (Paraspeckle protein 1)(mPSP1)"	0.5354	58	14	0.4245	32	14	0.6329	65	8	0.787551	0.00384885	1.15691	0.69158	0.00012835	1.16002	0.589258	0.000949512	1.25764	1.14979	0.196469	1.24904	1.16643	0.12543	1.22511	1.12024	0.317989	1.28374	0.974571	0.780986	1.21822	0.870434	0.0232342	1.12363	0.86662	0.695194	2.29108	1.14056	0.184626	1.2258	1.02468	0.67854	1.13225	0.786676	0.17452	1.45576	1.01639
ENSMUSP00000112039	ENSMUSG00000059776	AC112998.1	AC112998.1 Q5RKP3 "60S ribosomal protein L13 "	0.6635	34	11	0.5592	23	7	0.5972	33	6	1.15435	0.152735	1.22953	1.25814	0.0393594	1.23877	1.02677	0.613511	1.13449	1.04628	0.56849	1.18643	1.13332	0.0183102	1.10002	0.913579	0.0526371	1.09627	1.30605	0.0337887	1.27382	1.30358	0.00119888	1.11932	1.25707	0.167032	1.43907	1.1336	0.159892	1.20202	1.18876	0.0172649	1.13862	1.34544	0.0126912	1.22264	1.29707
ENSMUSP00000025965	ENSMUSG00000025001	Hells	Q60848 "Lymphocyte-specific helicase (EC 3.6.1.-)(Proliferation-associated SNF2-like protein)"	0.363	69	12	0.2607	35	15	0.5834	77	16	0.847384	0.0159964	1.13679	0.812153	0.00174711	1.12271	0.885485	6.11152e-06	1.03892	1.07055	0.238707	1.12799	0.935536	4.09141e-05	1.02466	0.835245	2.85402e-07	1.04488	1.2092	0.192778	1.35169	0.982179	0.836349	1.20115	0.796611	0.125169	1.34764	0.955139	0.360753	1.11175	1.01896	0.745604	1.12946	0.881462	0.0351604	1.12314	1.26004
ENSMUSP00000099602	ENSMUSG00000040383	Aqr	A2AQA7 "Aquarius "	0.291	100	12	0.1507	38	9	0.3657	75	10	0.971955	0.677205	1.15769	0.870648	0.176686	1.24057	1.03408	0.382114	1.086	1.00558	0.931475	1.14929	1.05163	0.0323715	1.04593	0.977696	0.441669	1.06545	1.13595	0.0223307	1.1114	1.10355	0.194975	1.17427	1.07855	0.604105	1.37485	1.03801	0.59726	1.16292	0.928105	0.289632	1.16384	0.992771	0.840465	1.08243	1.03442
ENSMUSP00000045048	ENSMUSG00000042079	Hnrnpf	Q9Z2X1 "Heterogeneous nuclear ribonucleoprotein F (hnRNP F) [Contains Heterogeneous nuclear ribonucleoprotein F, N-terminally processed]"	0.5036	63	10	0.5205	45	9	0.7205	65	8	1.14973	0.165957	1.2329	0.949169	0.684769	1.33067	1.10435	0.0235685	1.08485	0.988205	0.936437	1.38717	0.974671	0.694313	1.15624	1.08814	0.0728818	1.09935	1.1048	0.450293	1.33065	0.978773	0.756383	1.1666	0.758702	0.265052	1.7145	1.06161	0.558198	1.24912	0.91304	0.463621	1.31334	0.923185	0.499763	1.30428	1.13351
ENSMUSP00000029171	ENSMUSG00000027642	Rpn2	A2ACG7 "Ribophorin II "	0.357	42	13	0.2948	21	11	0.4993	46	13	1.28584	0.0730058	1.32155	1.32567	6.33649e-05	1.10037	1.13053	0.000642643	1.06023	1.06497	0.629864	1.31965	1.04583	0.0671106	1.04982	1.07418	0.026132	1.06341	1.13196	0.386347	1.35045	1.20256	0.000188928	1.07428	0.929938	0.814819	1.93688	1.16242	0.248037	1.3101	1.31344	0.000194555	1.11217	0.948047	0.729773	1.38925	1.19639
ENSMUSP00000025264	ENSMUSG00000024400	Wdr33	Q8C4Z4;Q8C7C6;Q8CD02;Q8K1G7;Q8K4P0;Q8VE87 "Putative uncharacterized protein ";"Putative uncharacterized protein Fragment ";"Putative uncharacterized protein Fragment ";"Putative uncharacterized proteinWdr33 protein ;";"Putative WDC146 ";"Wdr33 protein Fragment "	0.2602	50	11	0.1496	30	5	0.2977	70	8	0.743399	0.220531	1.6644	0.806249	0.10094	1.32516	0.93855	0.0994563	1.08222	0.879389	0.470097	1.47045	1.04227	0.312274	1.1046	0.987477	0.769338	1.1027	0.728967	0.105425	1.48782	0.867842	0.0430461	1.14402	0.862468	0.475824	1.59122	0.684152	0.015879	1.33611	0.802783	0.0141975	1.15806	0.863028	0.0101195	1.10495	0.7594
ENSMUSP00000094778	ENSMUSG00000072235	Tuba1a	P68369 "Tubulin alpha-1A chain (Tubulin alpha-1 chain)(Alpha-tubulin 1)(Alpha-tubulin isotype M-alpha-1)"	0.4856	35	2	0.3525	24	3	0.6563	53	5	1.44543	0.250659	6.99094	1.44601	0.0568447	1.48502	1.25142	0.0106166	1.1475	1.23312	0.0628008	1.30148	0.946739	0.345823	1.21233	1.1053	0.0439098	1.10041	1.22258	0.367901	5.28698	1.09112	0.167342	1.19299	1.30718	0.0333227	1.26283	1.14467	0.363685	3.01459	1.26265	0.114708	1.45171	1.12755	0.316525	1.33825	1.29176
ENSMUSP00000032088	ENSMUSG00000030016	Zfml	Q61464 "Zinc finger protein 638 (Zinc finger matrin-like protein)(Nuclear protein 220)"	0.2071	89	14	0.1883	49	17	0.3128	104	9	0.657441	2.76349e-06	1.12238	0.665259	3.90807e-07	1.11088	0.716315	5.28201e-06	1.07489	1.0509	0.480459	1.15909	1.04075	0.0764495	1.04572	1.02338	0.542077	1.08731	0.753919	0.00465151	1.19593	0.752232	5.42427e-05	1.11729	1.00845	0.921441	1.21012	0.848436	0.00245084	1.09944	0.81307	1.39641e-06	1.06072	0.943816	0.396601	1.16054	0.896471
ENSMUSP00000022927	ENSMUSG00000022314	Rad21	Q61550 "Double-strand-break repair protein rad21 homolog (Pokeweed agglutinin-binding protein 29)(PW29)(SCC1 homolog)"	0.3213	40	13	0.3039	33	14	0.4803	45	12	0.621662	0.0482258	1.6015	0.652698	0.000566763	1.22567	0.787387	3.07259e-05	1.08081	0.667546	0.100391	1.64208	0.881878	0.329883	1.30764	0.962667	0.584749	1.16039	0.635333	0.052767	1.58408	0.769196	3.41359e-05	1.09632	1.11418	0.546594	1.46604	0.687309	0.102543	1.58768	0.748222	0.00228681	1.1802	0.953998	0.716931	1.32129	0.731104
ENSMUSP00000039853	ENSMUSG00000035049	Rrp12	Q6P5B0 "RRP12-like protein "	0.2726	70	13	0.2795	47	23	0.4633	111	17	0.901229	0.502608	1.38799	0.915841	0.374348	1.22271	0.903928	0.00112099	1.05555	1.02007	0.912522	1.47108	0.963308	0.29033	1.07418	0.837186	5.07392e-05	1.07121	0.961271	0.808016	1.41407	0.91967	0.0690397	1.09511	0.930392	0.664785	1.41407	1.04888	0.777959	1.43413	0.978406	0.738279	1.14316	0.936291	0.243958	1.12228	1.1642
ENSMUSP00000119298	ENSMUSG00000027620	Rbm39	Q0VGU9;Q3TJP1;Q3U313;Q3UXT6;Q3UZ51 "Rbm39 protein ";"Putative uncharacterized protein Fragment ";"Putative uncharacterized proteinRNA binding motif protein 39 ;";"Putative uncharacterized protein Fragment ";"Putative uncharacterized protein Fragment "	0.4084	37	10	0.3245	27	10	0.6908	50	8	1.01616	0.79897	1.14827	0.924179	0.481084	1.27466	0.959784	0.565335	1.17458	0.972107	0.330248	1.06415	1.0485	0.109344	1.06215	1.11044	0.162197	1.17184	1.09363	0.121035	1.12552	1.08107	0.13536	1.11349	1.36796	0.217915	1.74563	0.97013	0.500811	1.10275	0.956869	0.617345	1.21257	0.747323	0.293094	1.83311	1.0671
ENSMUSP00000025649	ENSMUSG00000024740	Ddb1	Q3U1J4 "DNA damage-binding protein 1 (Damage-specific DNA-binding protein 1)(UV-damaged DNA-binding factor)(DDB p127 subunit)"	0.2202	56	13	0.2307	36	19	0.3421	66	14	0.811321	0.0877519	1.27777	0.864573	0.0851316	1.18271	0.870544	0.00238123	1.0829	0.851062	0.23947	1.3283	0.905751	0.0039829	1.06506	0.915658	0.0314519	1.08215	0.732214	0.0306895	1.3197	0.970416	0.43594	1.0824	0.79949	0.426771	1.80251	0.794773	0.0872424	1.30838	0.959776	0.556135	1.15467	0.823968	0.193983	1.3571	0.85754
ENSMUSP00000034787	ENSMUSG00000032253	Phip	Q8VDD9 "PH-interacting protein (PHIP)(IRS-1 PH domain-binding protein)(WD repeat-containing protein 11)(Neuronal differentiation-related protein)(NDRP)"	0.207	76	14	0.07249	19	5	0.2411	74	6	0.904146	0.165116	1.15948	1.00367	0.964567	1.23998	0.914753	0.0701401	1.10493	0.922772	0.163392	1.12469	0.91673	0.0326802	1.07816	0.850202	0.00133057	1.0668	0.998725	0.988596	1.20838	1.14235	0.0257197	1.11254	0.723617	0.286791	2.00934	1.03915	0.603625	1.16871	1.10855	0.190015	1.19895	1.00052	0.994332	1.19566	1.08212
ENSMUSP00000028617	ENSMUSG00000027193	Api5	O35841 "Apoptosis inhibitor 5 (API-5)(AAC-11)"	0.4425	39	12	0.4187	38	14	0.5675	49	12	0.903714	0.00695571	1.06964	0.840087	0.00699072	1.12489	0.797204	8.72599e-06	1.0664	0.864787	0.00409726	1.09261	1.06094	0.560886	1.23874	0.961087	0.583307	1.16716	1.02401	0.579102	1.09566	0.952817	0.186253	1.07768	0.923955	0.864155	2.70196	0.869594	0.0162941	1.11468	0.850927	0.0101386	1.12303	0.75433	0.0153751	1.24182	0.951185
ENSMUSP00000038382	ENSMUSG00000036693	Nop14	Q8R3N1 "Nucleolar protein 14 (Nucleolar complex protein 14)"	0.3244	66	13	0.2186	31	11	0.343	55	7	1.11371	0.24038	1.20923	1.0711	0.526357	1.26254	1.04724	0.175466	1.07632	0.973013	0.680319	1.15163	1.03179	0.304751	1.06657	0.822454	0.00205576	1.09675	0.984684	0.862391	1.20914	1.06767	0.133599	1.09346	0.839145	0.38103	1.5746	1.10036	0.176916	1.15706	1.12059	0.319552	1.27402	0.932951	0.354571	1.1845	1.11662
ENSMUSP00000052745	ENSMUSG00000001833	Sept7	O55131 "Septin-7 (CDC10 protein homolog)"	0.4645	43	8	0.2609	18	6	0.3364	30	4	1.46792	0.009893	1.2954	1.35913	0.0830902	1.44062	1.11749	0.396895	1.43125	0.851575	0.139237	1.25583	0.956377	0.117057	1.06248	1.02585	0.552462	1.12946	1.00451	0.94678	1.16625	0.908346	0.360989	1.27877	0.802529	0.83634	22.4048	0.896591	0.238986	1.2221	0.807747	0.063086	1.25928	0.721471	0.257405	2.10594	1.11115
ENSMUSP00000021803	ENSMUSG00000021374	Nup153	Q3TA10;Q3V3W1;Q80UN3;Q80WR0;Q8BRF6;Q8R2M9 "Putative uncharacterized protein Fragment ";"Putative uncharacterized protein Fragment ";"Nup153 protein Fragment ";"Nucleoporin 153 ";"Putative uncharacterized protein Fragment ";"Nup153 protein Fragment "	0.1929	47	14	0.1833	36	13	0.2476	59	7	1.19331	0.107676	1.24724	1.03238	0.349114	1.07387	0.84339	0.192749	1.32858	1.0776	0.57713	1.32611	0.958837	0.0593668	1.04496	0.737259	0.100986	1.46998	1.08995	0.534446	1.33849	0.936895	0.00567659	1.04318	0.705617	0.203053	1.81714	1.10282	0.488518	1.34521	0.970793	0.227649	1.05211	0.770047	0.141898	1.45972	1.13705
ENSMUSP00000080854	ENSMUSG00000058558	Rpl5	P47962 "60S ribosomal protein L5 "	0.6094	50	11	0.5051	29	10	0.7138	52	8	1.19631	0.181497	1.32058	1.37619	0.13753	1.55755	1.19593	0.0161957	1.14387	1.01809	0.890813	1.32794	1.09805	0.00768708	1.06391	1.07091	0.266911	1.14376	1.21695	0.00704763	1.13834	1.27504	0.0013163	1.12732	0.925572	0.848648	2.51851	1.16487	0.30656	1.37103	1.31851	0.152146	1.4915	1.1882	0.567137	1.9723	1.27052
ENSMUSP00000107237	ENSMUSG00000060373	Hnrnpc	Q9Z204 "Heterogeneous nuclear ribonucleoproteins C1/C2 (hnRNP C1/C2)"	0.4162	39	13	0.5911	60	18	0.754	70	17	1.09496	0.800924	2.15272	0.912925	0.776395	1.94666	0.897166	0.0154021	1.08854	1.14649	0.74326	2.43189	0.989314	0.748733	1.07211	0.988144	0.836612	1.1282	1.07547	0.859872	2.40836	0.856185	0.0199747	1.1361	1.02678	0.946388	2.27127	1.21808	0.651557	2.52988	1.0046	0.987638	1.85121	1.05205	0.841688	1.69878	1.09921
ENSMUSP00000025483	ENSMUSG00000024587	Nars	Q8BP47 "Asparaginyl-tRNA synthetase, cytoplasmic (EC 6.1.1.22)(Asparagine--tRNA ligase)(AsnRS)"	0.381	39	12	0.3202	22	11	0.4615	43	8	0.631673	2.71571e-07	1.08832	0.675711	0.017963	1.36206	0.784084	0.0001184	1.0778	1.10749	0.0848111	1.12597	0.951607	0.266454	1.09845	1.10323	0.0657211	1.11251	0.523125	0.00119857	1.38126	0.59871	4.39359e-05	1.18123	0.677843	0.325695	2.38729	0.71085	3.36487e-05	1.1186	0.787641	0.138737	1.39179	0.759166	0.264528	1.71135	0.775088
ENSMUSP00000028969	ENSMUSG00000027469	Tpx2	A2APB8;Q3U500;Q6P9S6;Q8BTJ3;Q9CT36 "TPX2, microtubule-associated protein homolog (Xenopus laevis)TPX2, microtubule-associated protein homolog (Xenopus laevis), isoform CRA_a ;";"Putative uncharacterized protein ";"TPX2, microtubule-associated protein homolog (Xenopus laevis) ";"Putative uncharacterized protein ";"Putative uncharacterized protein Fragment "	0.3973	62	15	0.3477	41	17	0.396	53	5	1.39492	0.00120418	1.19058	1.28116	0.000111477	1.10894	1.02192	0.452846	1.07514	1.15963	0.103776	1.20065	1.07852	0.00181982	1.04389	0.933958	0.244402	1.14923	1.30355	0.0654627	1.32929	1.11395	0.0450106	1.11094	0.87553	0.173633	1.25008	1.08526	0.308752	1.18155	1.10489	0.0594964	1.10987	0.774582	0.000137792	1.05073	1.42104
ENSMUSP00000081142	ENSMUSG00000041459	Tardbp	Q3U591;Q3V0E7;Q544R5;Q8BUM1 "Putative uncharacterized protein ";"Putative uncharacterized protein ";"Putative uncharacterized proteinTAR DNA binding proteinTDP-43 variant 1MCG16669, isoform CRA_b ;;;";"Putative uncharacterized protein "	0.43	39	1	0.4179	32	11	0.7222	54	11	1.01627			0.943066	0.660129	1.33406	1.02597	0.215678	1.04416	1.1146			0.984704	0.809591	1.1489	1.04672	0.365235	1.11322	0.969479			0.89785	0.326288	1.26185	0.881561	0.715163	2.11291	1.12282			0.941452	0.585349	1.26927	0.909256	0.425143	1.29036	0.926581
ENSMUSP00000016081	ENSMUSG00000015937	H2afy	Q9QZQ8 "Core histone macro-H2A.1 (Histone macroH2A1)(mH2A1)(H2A.y)(H2A/y)"	0.5887	52	8	0.5323	46	14	0.7366	74	10	0.8044	0.684888	3.37543	0.981824	0.94104	1.69119	0.871456	0.0782091	1.16959	0.664096	0.413631	3.04638	0.988855	0.697366	1.06278	1.20097	0.08072	1.23439	0.651691	0.317457	2.56207	0.868578	0.208	1.25822	1.1422	0.666929	1.96607	0.624914	0.233265	2.34491	0.798933	0.317026	1.59353	0.934079	0.656104	1.39793	0.700534
ENSMUSP00000063744	ENSMUSG00000032423	Syncrip	Q7TMK9 "Heterogeneous nuclear ribonucleoprotein Q (hnRNP Q)(Synaptotagmin-binding, cytoplasmic RNA-interacting protein)(Glycine- and tyrosine-rich RNA-binding protein)(GRY-RBP)(NS1-associated protein 1)(pp68)"	0.3541	45	7	0.4448	42	11	0.6139	67	8	0.938028	0.529544	1.26452	0.907786	0.350815	1.24638	0.861262	0.0083373	1.10204	0.813223	0.191405	1.4101	0.896211	0.00493355	1.07038	0.922344	0.289106	1.18139	0.933292	0.53018	1.28874	1.09826	0.0526946	1.0997	1.13707	0.527448	1.57924	1.06374	0.613849	1.32871	1.08815	0.400142	1.23884	1.23708	0.0881376	1.28927	1.04992
ENSMUSP00000024727	ENSMUSG00000023932	Cdc5l	Q6A068 "Cell division cycle 5-related protein (Cdc5-like protein)"	0.3192	56	12	0.3242	43	15	0.4401	70	9	0.889949	0.262893	1.24293	0.883349	0.0137789	1.09914	0.831216	1.99281e-05	1.049	0.97195	0.831466	1.33286	1.04067	0.332469	1.08892	0.894898	7.01036e-05	1.03479	1.0818	0.510413	1.2897	0.956491	0.0922093	1.05421	1.24256	0.071313	1.2725	0.978903	0.864445	1.30807	0.904794	0.0503802	1.10545	1.01072	0.787891	1.09242	0.965811
ENSMUSP00000071616	ENSMUSG00000043716	Rpl7	P14148 "60S ribosomal protein L7 "	0.5963	42	12	0.5444	32	9	0.6519	34	5	1.18183	0.370721	1.48759	1.33612	0.108604	1.44782	1.32243	0.0649653	1.35958	1.03699	0.867246	1.60291	1.02836	0.404987	1.07611	0.963942	0.408733	1.11692	1.21049	0.471666	1.76642	1.19917	0.275209	1.42991	0.835902	0.62133	2.53691	1.18996	0.437304	1.60789	1.21736	0.166665	1.34733	1.4511	0.0773773	1.54856	1.22082
ENSMUSP00000084794	ENSMUSG00000038914	Dido1	Q8C9B9 "Death-inducer obliterator 1 (DIO-1)(Death-associated transcription factor 1)(DATF-1)"	0.2083	92	12	0.1277	36	7	0.3839	137	9	1.11732	0.00481765	1.07188	1.04955	0.374447	1.1313	1.11661	0.00305594	1.06265	0.93926	0.208148	1.10865	0.922761	0.0531973	1.08536	0.958333	0.227683	1.07801	1.13724	0.0286459	1.11905	1.06101	0.102828	1.07827	0.95502	0.818458	1.56425	1.04517	0.363799	1.1081	0.981448	0.572736	1.07987	0.909182	0.077871	1.11472	1.04791
ENSMUSP00000031617	ENSMUSG00000029614	Rpl6	P47911 "60S ribosomal protein L6 (TAX-responsive enhancer element-binding protein 107)(TAXREB107)"	0.402	28	10	0.5034	26	11	0.6318	43	10	1.42634	1.47204e-05	1.10014	1.48005	1.57973e-05	1.11956	1.1012	0.0221246	1.08222	1.12322	0.0546349	1.12642	1.16651	0.000677362	1.07341	1.12621	0.070071	1.1398	1.44689	0.0005839	1.17527	1.35887	3.26752e-05	1.10091	0.983326	0.967638	2.48884	1.32572	0.0016632	1.1551	1.36697	0.000326712	1.13922	1.23664	0.196341	1.41098	1.46851
ENSMUSP00000085316	ENSMUSG00000051149	Adnp	Q9Z103 "Activity-dependent neuroprotector homeobox protein (Activity-dependent neuroprotective protein)"	0.2319	52	12	0.176	25	9	0.3348	51	12	1.05611	0.685376	1.33486	0.952302	0.279116	1.10194	1.05658	0.00879519	1.03886	1.00892	0.955873	1.41247	0.974995	0.318367	1.05641	0.919386	0.000926291	1.04212	1.00216	0.991527	1.54836	1.0014	0.988571	1.24325	1.09467	0.458406	1.29573	1.06075	0.726088	1.44005	0.946815	0.0153776	1.04192	0.950906	0.495181	1.17006	1.03325
ENSMUSP00000114159	ENSMUSG00000028691	Prdx1	B1AXW4;B1AXW5;B1AXW6;B1AXW7;Q3U9J9 "Peroxiredoxin 1 Fragment ";"Peroxiredoxin 1 Fragment ";"Peroxiredoxin 1 Fragment ";"Peroxiredoxin 1MCG19655 ;";"Putative uncharacterized protein "	0.6181	27	11	0.7286	26	13	0.6181	24	6	0.986013	0.822121	1.14566	1.09991	0.591238	1.45655	1.18318	0.00356895	1.08733	0.849867	0.111678	1.23093	0.741807	5.82888e-05	1.11373	0.890002	0.00750274	1.07165	0.737278	0.000263815	1.13155	0.760308	0.00104491	1.14923	0.887375	0.746675	2.45911	1.05292	0.466896	1.16405	1.02444	0.878762	1.40166	1.23731	0.060836	1.255	1.03097
ENSMUSP00000001452	ENSMUSG00000001416	Cct3	P80318 "T-complex protein 1 subunit gamma (TCP-1-gamma)(CCT-gamma)(Matricin)(mTRiC-P5)"	0.3578	38	9	0.4073	26	17	0.6275	53	19	0.897496	0.0938096	1.14017	0.904318	0.116937	1.1373	1.1309	1.84154e-07	1.03217	1.02419	0.762853	1.19304	0.834044	1.57747e-08	1.03767	1.03648	0.0832526	1.04191	0.925902	0.142332	1.11527	0.963357	0.0931172	1.04532	1.24473	0.0259637	1.20869	1.14254	0.133553	1.20207	1.19082	0.00724046	1.12792	1.31134	9.29861e-05	1.12065	0.930011
ENSMUSP00000071922	ENSMUSG00000021115	Vrk1	Q80X41 "Serine/threonine-protein kinase VRK1 (EC 2.7.11.1)(Vaccinia-related kinase 1)(Serine/threonine-protein kinase 51PK)"	0.5216	42	8	0.5	34	11	0.6322	46	7	0.790539	0.00371452	1.13914	0.803232	0.00368873	1.13843	0.709369	8.15297e-05	1.09334	1.01374	0.875545	1.21981	1.13359	0.00871388	1.08975	1.02831	0.727267	1.20551	0.850536	0.00105433	1.06946	0.89089	0.051946	1.12379	0.797293	0.213397	1.48927	0.902259	0.144061	1.15941	0.912285	0.0771355	1.1094	0.938608	0.52101	1.25547	1.1887
ENSMUSP00000024627	ENSMUSG00000023852	Chd1	P40201 "Chromodomain-helicase-DNA-binding protein 1 (CHD-1)(EC 3.6.1.-)(ATP-dependent helicase CHD1)"	0.2011	87	11	0.08884	29	6	0.3255	112	9	1.03843	0.708217	1.24383	1.02942	0.730372	1.22695	1.12107	0.0426617	1.11567	0.940657	0.581955	1.27071	0.984317	0.565685	1.06836	0.982123	0.740247	1.12883	0.871766	0.211284	1.25725	0.997884	0.947764	1.0823	1.1332	0.547063	1.58195	0.944531	0.556051	1.23213	0.947384	0.266959	1.11769	1.0901	0.305906	1.19948	0.955392
ENSMUSP00000106863	ENSMUSG00000026547	Tagln2	Q9WVA4 "Transgelin-2 (SM22-beta)"	0.7143	48	12	0.7788	44	13	0.9263	56	12	1.54803	0.0300463	1.47152	1.49035	0.0540851	1.5027	1.12903	0.0946378	1.15726	1.2031	0.0961984	1.25073	0.826383	0.00316009	1.1196	1.24402	0.083717	1.28752	1.39767	0.00270499	1.21102	1.14311	0.0955451	1.17481	1.50636	0.319481	2.37466	2.4097	9.588e-06	1.28659	1.86355	0.00250373	1.42819	1.78041	0.0145368	1.55013	1.04402
ENSMUSP00000103267	ENSMUSG00000063229	Ldha	P06151 "L-lactate dehydrogenase A chain (LDH-A)(EC 1.1.1.27)(LDH muscle subunit)(LDH-M)"	0.4626	37	12	0.5125	33	12	0.6814	47	12	1.44279	0.0960545	1.55787	1.52862	0.0115205	1.36153	1.01334	0.752704	1.09449	1.21455	0.261837	1.43578	0.919307	0.0125892	1.06418	1.26068	0.000745917	1.1168	1.17522	0.346399	1.43513	0.930582	0.212243	1.12701	1.15956	0.262249	1.31752	1.3453	0.123433	1.47893	1.45081	0.0136309	1.32221	1.34992	0.00180971	1.17554	1.11355
ENSMUSP00000101727	ENSMUSG00000028034	Fubp1	Q0P6B2;Q3TIS5;Q3TUE1;Q3UUU2 "Far upstream element (FUSE) binding protein 1Far upstream element (FUSE) binding protein 1, isoform CRA_c ;";"Putative uncharacterized protein ";"Putative uncharacterized protein ";"Putative uncharacterized protein "	0.3692	55	10	0.3645	48	14	0.553	69	13	2.46556	0.0199743	2.06119	1.98262	2.11263e-08	1.13123	2.20682	5.8649e-08	1.15748	1.22692	0.428194	1.74644	1.07761	0.301564	1.16191	1.05044	0.305854	1.10545	1.81635	0.0841114	2.00444	1.49876	0.00405163	1.28532	1.51253	0.103068	1.66696	1.60313	0.0216899	1.46984	1.51785	1.40004e-05	1.14327	1.65129	0.00151455	1.30681	1.2751
ENSMUSP00000005041	ENSMUSG00000030435	U2af2	P26369 "Splicing factor U2AF 65 kDa subunit (U2 auxiliary factor 65 kDa subunit)(U2 snRNP auxiliary factor large subunit)"	0.3684	39	11	0.2463	27	7	0.6295	55	10	1.02235	0.613716	1.09915	0.997897	0.993028	1.75946	1.08386	0.00557417	1.05161	0.911178	0.362743	1.24274	0.99418	0.882341	1.09691	1.06349	0.126862	1.0863	1.12643	0.352435	1.31256	1.00558	0.969831	1.41242	1.0754	0.79827	1.86742	0.992075	0.834905	1.0864	0.938235	0.692384	1.45597	1.14999	0.232864	1.28037	1.02492
ENSMUSP00000032751	ENSMUSG00000030536	Iqgap1	Q9JKF1 "Ras GTPase-activating-like protein IQGAP1 "	0.2674	103	9	0.1503	44	9	0.248	83	3	1.06216	0.519765	1.22944	0.92962	0.396657	1.20674	1.25378	0.0296008	1.1868	0.889758	0.249955	1.24252	0.978346	0.754767	1.16901	0.965359	0.466872	1.18558	0.954698	0.616535	1.22781	0.815076	0.00730336	1.14123	1.3435	0.488247	4.51896	0.882068	0.183111	1.21964	0.712123	1.08221e-05	1.08425	1.15213	0.412965	1.81163	0.650762
ENSMUSP00000082682	ENSMUSG00000066551	Hmgb1	P63158 "High mobility group protein B1 (High mobility group protein 1)(HMG-1)"	0.5256	42	10	0.6233	44	9	0.6791	60	5	1.21274	0.650336	2.53602	1.27789	0.441193	2.00938	0.978013	0.507244	1.08854	1.16478	0.739851	2.73854	0.797124	0.00215393	1.12483	0.925599	0.128419	1.11878	0.776832	0.63105	3.15556	0.654383	0.00446048	1.28388	1.41171	0.740453	14.8135	1.29825	0.60304	2.99112	1.26882	0.393134	1.83735	0.850248	0.73077	3.38769	1.16643
ENSMUSP00000111977	ENSMUSG00000036940	Kdm1a	Q6ZQ88 "Lysine-specific histone demethylase 1 (EC 1.-.-.-)(Flavin-containing amine oxidase domain-containing protein 2)(BRAF35-HDAC complex protein BHC110)"	0.279	47	12	0.3058	39	14	0.4385	52	10	1.12294	0.191262	1.20112	1.02555	0.684399	1.14004	0.994574	0.809817	1.05091	0.978513	0.810493	1.21487	0.998384	0.971556	1.10091	1.02569	0.521777	1.08991	0.948992	0.627169	1.25939	0.993101	0.891708	1.11373	1.03882	0.845254	1.53547	1.09126	0.365687	1.22596	1.00991	0.841226	1.10983	1.05226	0.724307	1.37248	1.02419
ENSMUSP00000039757	ENSMUSG00000035021	Baz1a	O88379 "Bromodomain adjacent to zinc finger domain protein 1A (Cbp146)"	0.2521	86	13	0.1698	31	12	0.3756	104	18	1.17308	0.04179	1.16493	1.16647	0.0347862	1.15118	1.27041	8.23953e-07	1.06936	1.236	0.0341513	1.21312	1.26853	6.20323e-05	1.08728	1.09263	0.0274277	1.08056	1.14641	0.125869	1.19839	1.16312	0.0505882	1.16366	0.870409	0.413787	1.41844	1.16768	0.10541	1.21275	1.09386	0.192726	1.15292	1.04096	0.70531	1.24638	1.45919
ENSMUSP00000113070	ENSMUSG00000024002	Brd4	Q9ESU6 "Bromodomain-containing protein 4 (Mitotic chromosome-associated protein)(MCAP)"	0.1964	50	8	0.165	41	7	0.3014	73	9	0.914917	0.134544	1.13237	0.894697	0.129337	1.16757	0.914816	0.0658245	1.1012	0.919984	0.214131	1.15531	0.975409	0.358744	1.06323	0.971263	0.219624	1.05178	0.827814	0.00159988	1.09388	0.828828	0.212425	1.38998	0.940482	0.705584	1.43527	0.976706	0.699304	1.14853	0.96088	0.229301	1.0757	0.957378	0.46327	1.13928	0.80477
ENSMUSP00000086626	ENSMUSG00000001924	Uba1	Q02053 "Ubiquitin-like modifier-activating enzyme 1 (Ubiquitin-activating enzyme E1)(Ubiquitin-like modifier-activating enzyme 1 X)(Ubiquitin-activating enzyme E1 X)"	0.2675	55	10	0.1862	28	4	0.4149	65	11	1.04756	0.65509	1.25547	1.08849	0.519676	1.44917	1.12826	0.00931126	1.08733	1.04479	0.71227	1.29736	0.845843	0.197825	1.38151	1.17934	0.000553059	1.07658	1.10278	0.366596	1.26209	1.14051	0.142711	1.23589	1.03578	0.836157	1.44623	1.07196	0.549071	1.28727	1.1659	0.261404	1.42459	1.12469	0.0443431	1.12062	1.02835
ENSMUSP00000108561	ENSMUSG00000000568	Hnrnpd	Q60668 "Heterogeneous nuclear ribonucleoprotein D0 (hnRNP D0)(AU-rich element RNA-binding protein 1)"	0.503	43	7	0.5565	46	7				1.12141	0.728515	2.23077	1.24823	0.233825	1.50667				0.934999	0.86748	2.67484	1.06816	0.145081	1.10116				0.997093	0.996316	4.69773	0.774995	0.357562	1.87019				1.13076	0.693246	2.12923	1.20859	0.20118	1.38122				1.04018
ENSMUSP00000026459	ENSMUSG00000025393	Atp5b	P56480 "ATP synthase subunit beta, mitochondrial Precursor (EC 3.6.3.14)"	0.5198	49	11	0.5766	33	15	0.7599	70	18	0.926101	0.498957	1.2761	0.973605	0.783308	1.22711	0.828453	2.03427e-08	1.04129	1.00371	0.965594	1.20495	0.970669	0.562596	1.11368	1.02211	0.269673	1.04126	1.09371	0.39845	1.2539	1.12322	0.0605348	1.12987	0.977795	0.850825	1.28163	1.0289	0.737789	1.20253	1.09899	0.268549	1.19212	0.987387	0.904613	1.2463	1.04068
ENSMUSP00000113921	ENSMUSG00000021693	Kif2a	005 "kinesin family member 2A Gene [Source:MGI (curated);Acc:MGI:108390]" "MGI_curated_transcript"	0.3078	52	10	0.2193	26	5	0.3399	52	3	1.25137	0.00175475	1.12259	1.11678	0.375694	1.36056	0.940842	0.486691	1.36371	0.648532	0.00596421	1.31507	0.777885	0.000700035	1.0766	0.82301	0.122825	1.38325	0.746694	0.0338239	1.30241	0.75678	0.0775039	1.38756	1.02505	0.87826	1.84754	0.706338	0.00308849	1.21698	0.701401	0.00589981	1.2022	0.89678	0.490714	1.75093	0.806671
ENSMUSP00000080085	ENSMUSG00000058392	Rrp1b	Q91YK2 "Ribosomal RNA processing protein 1 homolog B (RRP1-like protein B)"	0.3881	52	14	0.3039	26	15	0.4669	53	9	0.898561	0.498078	1.39302	1.07785	0.602323	1.35209	0.950558	0.0654652	1.05634	0.979226	0.899863	1.42388	1.0955	0.000174292	1.03943	1.02369	0.528664	1.08544	0.862357	0.425995	1.47582	0.896174	0.196444	1.18929	0.738126	0.555892	3.1245	1.09345	0.608243	1.44392	1.1116	0.393163	1.29381	0.749933	0.324097	1.88058	1.08883
ENSMUSP00000059192	ENSMUSG00000041859	Mcm3	P25206 "DNA replication licensing factor MCM3 (DNA polymerase alpha holoenzyme-associated protein P1)(P1-MCM3)"	0.3534	56	11	0.3387	42	19	0.6268	88	24	0.862466	0.491209	1.58617	0.850611	0.154601	1.25706	1.07216	0.00390992	1.04597	0.923408	0.698333	1.56054	0.932504	0.00403731	1.04559	1.00946	0.770553	1.06822	0.94775	0.739129	1.41791	0.894916	0.0602162	1.12337	0.990804	0.95898	1.44423	0.78481	0.235381	1.53356	0.813604	0.0572111	1.23777	0.910388	0.40103	1.25486	0.832072
ENSMUSP00000020238	ENSMUSG00000020048	Hsp90b1	P08113 "Endoplasmin Precursor (Heat shock protein 90 kDa beta member 1)(94 kDa glucose-regulated protein)(GRP-94)(Endoplasmic reticulum resident protein 99)(ERp99)(Polymorphic tumor rejection antigen 1)(Tumor rejection antigen gp96)"	0.3217	59	10	0.197	23	7	0.3392	48	7	1.48592	0.00381105	1.26075	1.70118	0.000568328	1.2167	1.63825	0.000223964	1.16606	1.26256	0.00562386	1.15711	1.12623	0.0416067	1.11921	1.24247	0.0279989	1.20244	1.45152	0.00151827	1.20667	1.59479	0.000415194	1.17653	1.57782	0.0360024	1.51389	1.47077	0.000389546	1.17258	1.75262	5.53276e-05	1.14592	1.58931	0.00352148	1.27642	1.64293
ENSMUSP00000078469	ENSMUSG00000052488	Cherp	Q8CGZ0 "Calcium homeostasis endoplasmic reticulum protein (SR-related CTD-associated factor 6)"	0.2388	44	10	0.2473	30	12	0.3902	55	7	0.977974	0.609693	1.09995	0.880545	0.000875687	1.06394	0.856629	0.0126466	1.11386	0.942881	0.124733	1.08176	1.00184	0.923735	1.04217	0.898628	0.0527637	1.11477	1.26236	0.0121655	1.18352	1.07033	0.00973976	1.04911	0.987235	0.889958	1.24333	1.05964	0.41984	1.16766	0.90617	0.0411241	1.09832	0.926038	0.302174	1.18129	1.08379
ENSMUSP00000109671	ENSMUSG00000022961	Son	Q811G3;Q8BM30;Q8BS91 "Son protein Fragment ";"Putative uncharacterized protein ";"Putative uncharacterized protein Fragment "	0.1682	82	11				0.3482	126	12	1.0486	0.155467	1.07169				0.98561	0.856442	1.18799	1.12495	0.00792152	1.08256				1.02411	0.491313	1.07641	1.13559	0.0418838	1.12915				1.21667	0.228413	1.40272	1.1076	0.0784188	1.12318				0.961126	0.734926	1.28568	1.21485
ENSMUSP00000054863	ENSMUSG00000051695	Pcbp1	P60335 "Poly(rC)-binding protein 1 (Alpha-CP1)(Heterogeneous nuclear ribonucleoprotein E1)(hnRNP E1)"	0.5815	43	6	0.4831	33	6	0.8371	71	10	1.2127	0.0540967	1.21879	1.13053	0.587777	1.72446	1.15627	0.00692941	1.09895	1.17495	0.0259508	1.14159	1.23826	0.229499	1.49413	1.07291	0.41351	1.20405	1.15059	0.244407	1.31451	1.0613	0.433446	1.19683	1.77493	0.308258	3.32605	1.15912	0.0541844	1.16367	1.09069	0.596013	1.48364	1.08259	0.821537	2.16601	1.14492
ENSMUSP00000032237	ENSMUSG00000030138	Bms1	Q3UYW7;Q3V0N4;Q6PGF5;Q6ZQH0;Q8CEG3;Q8K0N8 "Putative uncharacterized protein Fragment ";"Putative uncharacterized protein Fragment ";"BMS1 homolog, ribosome assembly protein (Yeast)BMS1-like, ribosome assembly protein (Yeast) ;";"MKIAA0187 protein Fragment ";"Putative uncharacterized protein Fragment ";"Bms1 protein Fragment "	0.2072	45	13	0.1441	30	14	0.3224	69	8	1.04264	0.730656	1.29459	1.11388	0.0888168	1.13503	0.930936	0.031907	1.06539	0.920418	0.471902	1.27541	1.0548	0.0436658	1.05293	0.786028	0.00101459	1.11133	0.895451	0.441341	1.35566	1.00305	0.920151	1.06655	1.03767	0.870895	1.68005	1.00645	0.955671	1.27989	1.07327	0.1573	1.10713	1.03234	0.757134	1.26374	1.07011
ENSMUSP00000026126	ENSMUSG00000025133	Ints4	Q8CIM8 "Integrator complex subunit 4 (Int4)"	0.2604	58	11	0.1432	21	7	0.4315	70	11	1.00702	0.94404	1.24188	0.928295	0.283095	1.16702	1.05641	0.134564	1.07799	0.992441	0.920651	1.17995	0.945169	0.54158	1.23773	0.983828	0.707886	1.09879	1.09865	0.338369	1.2318	1.04303	0.450788	1.13637	0.931938	0.739163	1.58205	1.06275	0.556404	1.24962	0.953896	0.546844	1.19835	1.01626	0.825189	1.17171	1.10497
ENSMUSP00000032165	ENSMUSG00000030079	Ruvbl1	P60122 "RuvB-like 1 (EC 3.6.1.-)(49 kDa TATA box-binding protein-interacting protein)(49 kDa TBP-interacting protein)(TIP49a)(Pontin 52)(DNA helicase p50)"	0.4101	40	9	0.4298	26	11	0.5746	46	10	1.01137	0.881662	1.18481	0.986407	0.762106	1.10298	1.14786	0.000138729	1.05065	0.908211	0.148748	1.14907	0.958728	0.0294835	1.0377	0.971013	0.191773	1.04828	0.957094	0.33617	1.10566	0.894899	0.0491098	1.11685	1.00178	0.992124	1.48688	0.929559	0.11196	1.09971	0.948775	0.274601	1.10667	1.02306	0.757091	1.17552	0.966185
ENSMUSP00000112213	ENSMUSG00000030216	Wbp11	Q923D5 "WW domain-binding protein 11 (WBP-11)"	0.3666	48	12	0.2637	20	8	0.3651	40	5	0.938815	0.71984	1.45878	0.940311	0.690896	1.42067	0.913114	0.0124055	1.06009	0.95757	0.818157	1.49965	1.08882	0.162781	1.13771	1.00061	0.981139	1.06974	1.03586	0.866249	1.56805	1.01113	0.830628	1.12507	0.936195	0.759504	1.74779	0.971565	0.88519	1.5367	0.939574	0.645802	1.35939	0.946747	0.596975	1.30325	1.03093
ENSMUSP00000096549	ENSMUSG00000040028	Elavl1	P70372 "ELAV-like protein 1 (Hu-antigen R)(HuR)(Elav-like generic protein)(MelG)"	0.5982	38	12	0.4847	30	8	0.6687	45	9	1.03136	0.599143	1.13378	0.920103	0.214956	1.15538	1.06252	0.114125	1.08205	1.03932	0.475971	1.12189	1.12462	0.108669	1.16313	1.06739	0.378667	1.17513	1.15488	0.0619132	1.16477	1.04829	0.350921	1.11807	0.882653	0.731904	2.25074	1.0463	0.498361	1.1529	0.949939	0.328658	1.12264	0.976836	0.802049	1.23187	1.02809
ENSMUSP00000034966	ENSMUSG00000032399	Rpl4	Q9D8E6 "60S ribosomal protein L4 "	0.4606	56	11	0.5561	39	12	0.6921	67	11	1.07834	0.310563	1.17036	1.24772	0.000862571	1.11362	1.11257	0.000254928	1.04401	0.932847	0.406706	1.19579	1.0361	0.143461	1.0508	0.925016	0.0110167	1.05738	1.1873	0.059308	1.197	1.25554	0.00010779	1.08908	0.821993	0.530514	1.95853	1.05702	0.563983	1.23007	1.21177	0.000839917	1.09753	1.15746	0.506371	1.60434	1.17301
ENSMUSP00000120595	ENSMUSG00000018379	Sfrs1	NP_775550.2 "splicing factor, arginine/serine-rich 1 isoform 1 "	0.754	40	12	0.7056	36	12	0.9073	57	10	0.903822	0.513746	1.39075	1.06538	0.727072	1.47593	0.937775	0.00631476	1.0412	0.933063	0.668733	1.41464	1.07623	0.0491303	1.07587	0.995138	0.93173	1.13557	1.04906	0.848242	1.71262	1.06403	0.64448	1.33365	0.876235	0.532642	1.59559	0.983071	0.920708	1.44622	1.07049	0.680044	1.42473	0.90358	0.0725565	1.11975	1.05553
ENSMUSP00000094176	ENSMUSG00000034543	Morc2a	Q69ZX6 "MORC family CW-type zinc finger protein 2A (Zinc finger CW-type coiled-coil domain protein 1)"	0.3243	65	12	0.132	21	5	0.3592	68	4	0.924746	0.285222	1.16694	0.994294	0.966765	1.4309	1.05444	0.314671	1.15029	0.960418	0.643909	1.20568	0.957789	0.333626	1.11514	0.909071	0.0197419	1.06875	0.898448	0.248106	1.21319	0.912816	0.149289	1.15267	1.00229	0.997051	6.10098	0.946254	0.491599	1.18637	1.02351	0.876609	1.4767	0.867103	0.575872	2.06507	0.999527
ENSMUSP00000041370	ENSMUSG00000042390	Gatad2b	Q8VHR5 "Transcriptional repressor p66-beta (p66/p68)(GATA zinc finger domain-containing protein 2B)"	0.4091	47	11	0.3249	22	10	0.5724	44	8	1.12773	0.243676	1.24132	1.03882	0.712654	1.25433	1.08355	0.179723	1.13579	1.09557	0.359366	1.23576	1.11246	0.342206	1.2718	0.961366	0.194745	1.06715	0.972555	0.825337	1.3148	0.944441	0.153656	1.08653	0.780127	0.27654	1.64484	1.06582	0.606492	1.30615	1.03798	0.616664	1.1766	0.82304	0.048862	1.21349	1.02625
ENSMUSP00000058618	ENSMUSG00000061755	Bod1l	O35243;Q3TR39;Q3USW6;Q6P8H7;Q80TF0;Q8BHG7 "Antigen containing epitope to monoclonal antibody MMS-85/12 Fragment ";"Putative uncharacterized protein Fragment ";"Putative uncharacterized protein Fragment ";"A230054D04Rik protein Fragment ";"MKIAA1327 protein Fragment ";"Putative uncharacterized protein Fragment "	0.1431	83	11	0.1141	53	12	0.2411	139	7	1.01771	0.70471	1.10549	0.964746	0.565783	1.14273	1.00021	0.99507	1.08179	0.914266	0.287619	1.1946	0.937545	0.0324958	1.05976	0.976912	0.688682	1.14556	0.945502	0.51573	1.20359	0.943765	0.203595	1.09882	1.11189	0.351785	1.29322	0.922826	0.0907897	1.10034	0.92761	0.113343	1.10091	0.9519	0.60399	1.24663	1.0497
ENSMUSP00000105612	ENSMUSG00000020430	Pes1	Q5SQ20 "Pescadillo homolog 1, containing BRCT domain (Zebrafish) "	0.3699	53	13	0.3367	30	10	0.5017	48	8	0.953503	0.699006	1.29946	1.07205	0.796548	1.80863	1.13326	0.0144319	1.09589	0.916799	0.554882	1.36562	1.03749	0.569929	1.15163	0.899627	0.112488	1.14783	1.13593	0.290137	1.28525	1.11806	0.689048	1.84175	0.792032	0.345066	1.72404	1.05861	0.675797	1.33584	1.1759	0.458187	1.60464	1.1405	0.485702	1.52576	1.17965
ENSMUSP00000042602	ENSMUSG00000035960	Apex1	P28352 "DNA-(apurinic or apyrimidinic site) lyase (EC 4.2.99.18)(Apurinic-apyrimidinic endonuclease 1)(AP endonuclease 1)(APEX nuclease)(APEN)"	0.5268	30	10	0.4858	18	7	0.7256	33	9	0.592134	0.000918959	1.2668	0.644312	0.0002484	1.14957	0.764229	7.5352e-06	1.06293	0.994973	0.965016	1.28761	1.12265	0.00108855	1.04947	1.17234	0.000207132	1.05888	0.671759	0.0136011	1.34209	0.793651	0.00134574	1.10571	0.96852	0.834486	1.4073	0.856811	0.0907665	1.2027	0.928429	0.111468	1.10235	0.998873	0.985162	1.14515	0.622862
ENSMUSP00000021381	ENSMUSG00000020994	Pnn	O35691 "Pinin "	0.3085	45	12	0.314	36	12	0.5331	70	12	0.962797	0.818137	1.4252	0.926442	0.257724	1.15129	0.987495	0.769092	1.09641	1.00075	0.99678	1.49509	1.03651	0.082463	1.04218	1.02145	0.636248	1.10079	1.14629	0.425777	1.43813	1.01936	0.419142	1.05156	1.05757	0.873365	2.12803	1.08458	0.652075	1.47049	0.978898	0.663822	1.11083	0.860352	0.388043	1.44536	1.08326
ENSMUSP00000030734	ENSMUSG00000028902	Sf3a3	Q9D554 "Splicing factor 3A subunit 3 (Spliceosome-associated protein 61)(SAP 61)(SF3a60)"	0.4032	45	12	0.3473	24	10	0.521	38	8	1.3041	0.190819	1.52075	0.909742	0.680122	1.65251	1.01928	0.683328	1.11202	1.2109	0.364981	1.56164	0.96435	0.0322044	1.03298	0.914625	0.00467083	1.05305	1.42285	0.0912235	1.52105	0.987211	0.844954	1.15564	1.18684	0.323819	1.46481	1.32318	0.164311	1.51232	0.902148	0.607136	1.54846	0.987932	0.865699	1.17782	1.37331
ENSMUSP00000109451	ENSMUSG00000006304	Arpc2	Q9CVB6 "Actin-related protein 2/3 complex subunit 2 (Arp2/3 complex 34 kDa subunit)(p34-ARC)"	0.5967	39	11	0.55	29	14	0.7767	47	9	1.1633	0.208804	1.28512	1.10607	0.41373	1.29418	0.954013	0.0694236	1.05317	0.9889	0.937465	1.36222	0.67568	0.00091938	1.21957	0.973269	0.811132	1.28783	0.669358	0.0203932	1.38155	0.786064	0.00136382	1.13681	1.24587	0.292247	1.56775	1.0998	0.45407	1.31273	1.08302	0.409986	1.22428	1.21033	0.0729444	1.23777	0.902495
ENSMUSP00000090884	ENSMUSG00000020143	Dock2	Q8C3J5 "Dedicator of cytokinesis protein 2 (Protein Hch)"	0.2577	117	9	0.07768	24	6	0.2489	88	3	0.775425	0.0853456	1.34835	0.674885	0.011352	1.29549	0.768461	0.0306481	1.22519	0.853778	0.262398	1.35305	0.856373	0.0289829	1.14046	0.946872	0.447094	1.28444	1.03585	0.814091	1.39685	1.06783	0.133359	1.09881	0.988841	0.866009	1.28727	0.866385	0.364744	1.41086	0.780752	0.0427379	1.26566	0.836185	0.030876	1.14855	0.955909
ENSMUSP00000019614	ENSMUSG00000019470	Xab2	Q9DCD2 "Pre-mRNA-splicing factor SYF1 (XPA-binding protein 2)"	0.3193	58	10	0.1661	22	6	0.4456	68	7	0.970405	0.59191	1.13006	1.02231	0.852278	1.33557	1.00554	0.770088	1.04523	1.06479	0.218605	1.11335	1.0775	0.0456078	1.0752	0.963253	0.152548	1.05753	1.20778	0.0429999	1.19887	1.16383	0.00306143	1.07561	1.08822	0.519852	1.35354	0.987085	0.8407	1.15271	1.07432	0.473605	1.26863	0.974606	0.77288	1.23176	1.06554
ENSMUSP00000033087	ENSMUSG00000003868	Ruvbl2	Q9WTM5 "RuvB-like 2 (EC 3.6.1.-)(p47 protein)"	0.3456	35	11	0.4471	26	13	0.5961	45	11	1.0822	0.679371	1.5121	0.931973	0.284028	1.1467	1.12179	3.07739e-05	1.03642	0.9475	0.781967	1.52592	0.955603	0.0903947	1.05521	1.04611	0.110684	1.05907	0.940557	0.762883	1.55327	0.878942	0.00568916	1.08732	1.30253	0.0555959	1.31251	1.00778	0.968759	1.5375	0.926006	0.141057	1.11216	1.14249	0.0380553	1.13231	0.966322
ENSMUSP00000022281	ENSMUSG00000016018	Skiv2l2	Q9CZU3 "Superkiller viralicidic activity 2-like 2 (EC 3.6.1.-)(ATP-dependent helicase SKIV2L2)"	0.2654	66	12	0.2212	30	11	0.3625	60	10	0.948637	0.208479	1.09074	0.974812	0.615205	1.11579	0.960646	0.0844203	1.04795	0.970711	0.513377	1.10172	0.962269	0.0856746	1.04597	0.843125	0.00146534	1.08933	0.895786	0.0385682	1.10863	0.914909	0.0170433	1.07181	0.748711	0.313842	1.84714	0.877589	0.0111702	1.09825	0.897696	0.0194834	1.09038	0.863934	0.020225	1.12473	0.944283
ENSMUSP00000112871	ENSMUSG00000015880	Ncapg	B2RQA7 "Ncapg protein "	0.253	66	10	0.1703	23	9	0.4213	64	9	0.829772	0.0358921	1.18681	0.996132	0.956983	1.1742	1.08829	0.00187477	1.04382	0.779124	0.0162932	1.21113	0.851684	0.00246808	1.08898	0.965098	0.326777	1.08159	0.639968	0.000692019	1.2214	0.916063	0.0174908	1.0701	0.969069	0.899897	1.74719	0.754682	0.0107302	1.21969	0.962083	0.553362	1.15499	1.03012	0.742115	1.2225	0.782671
ENSMUSP00000119065	ENSMUSG00000016921	Sfrs6	Q3TWW8;Q3UJV5;Q8BKL0;Q921K3;Q9DBP1 "Putative uncharacterized proteinSplicing factor, arginine/serine-rich 6 ;";"Putative uncharacterized protein ";"Putative uncharacterized protein ";"Splicing factor, arginine/serine-rich 6 ";"Putative uncharacterized protein "	0.5457	36	4	0.3923	28	6	0.8348	58	5	0.97309	0.379265	1.08803	0.823426	0.191591	1.39227	0.979154	0.487582	1.07958	0.956919	0.30159	1.11915	1.02829	0.13748	1.04143	1.02099	0.738394	1.17471	1.25086	0.123277	1.39758	1.0795	0.318866	1.19453	1.29021	0.221737	1.63103	1.05515	0.549694	1.28943	0.863963	0.0973133	1.20275	1.0051	0.962766	1.32871	1.064
ENSMUSP00000034204	ENSMUSG00000031754	Nudt21	Q9CQF3 "Cleavage and polyadenylation specificity factor subunit 5 (Nucleoside diphosphate-linked moiety X motif 21)(Nudix motif 21)"	0.5419	34	13	0.5374	20	7	0.8062	37	5	1.09208	0.630026	1.47446	0.800453	0.0364388	1.22516	0.829391	0.00189188	1.07394	1.11777	0.570702	1.51611	0.981493	0.58556	1.08259	0.959861	0.556567	1.19422	1.19913	0.369354	1.52843	0.944025	0.0854293	1.07093	1.199	0.432003	1.78104	1.16797	0.43426	1.51922	0.898935	0.18155	1.18833	0.94766	0.456652	1.19877	1.23695
ENSMUSP00000025831	ENSMUSG00000052085	Dock8	Q8C147 "Dedicator of cytokinesis protein 8 "	0.2529	118	16	0.09667	32	9	0.2414	104	9	0.68845	0.00621928	1.28429	0.672566	0.000137694	1.14396	0.482841	0.000134964	1.2791	0.863397	0.21798	1.2756	0.846994	0.000284754	1.06463	0.858915	0.0432912	1.15746	0.908072	0.281891	1.20213	0.969682	0.30292	1.06661	0.687357	0.327361	2.29043	0.844679	0.0282729	1.15974	0.878445	0.00157992	1.06593	0.620092	0.00556302	1.34081	0.900533
ENSMUSP00000029941	ENSMUSG00000028273	Pdlim5	Q8CI51 "PDZ and LIM domain protein 5 (Enigma homolog)(Enigma-like PDZ and LIM domains protein)"	0.2978	28	8	0.3858	26	12	0.5127	45	9	0.970712	0.808124	1.32146	0.966703	0.706076	1.21234	0.85969	0.000723192	1.06791	1.33502	0.0641898	1.3652	0.800279	0.00795891	1.16373	1.10985	0.251286	1.21451	0.482135	0.000158341	1.26531	0.53757	1.58288e-05	1.20643	0.780334	0.37394	1.83568	0.82656	0.0956047	1.26365	0.871889	0.118522	1.19508	0.712686	0.0226656	1.31978	0.722164
ENSMUSP00000021428	ENSMUSG00000021039	Snw1	Q9CSN1 "SNW domain-containing protein 1 (Nuclear protein SkiP)(Ski-interacting protein)"	0.4459	50	10	0.3116	26	12	0.6287	61	11	1.14519	0.0916984	1.17641	1.10018	0.271655	1.19911	1.0314	0.239097	1.05656	1.16555	0.0566352	1.17179	1.03832	0.123977	1.05094	1.05834	0.365077	1.1424	1.22268	0.0144209	1.16237	1.04716	0.258033	1.08874	0.930141	0.779661	1.75309	1.14847	0.0858684	1.17629	1.1039	0.199192	1.17265	0.975818	0.880321	1.42347	1.20354
ENSMUSP00000026704	ENSMUSG00000025613	Cct8	P42932 "T-complex protein 1 subunit theta (TCP-1-theta)(CCT-theta)"	0.3339	45	10	0.3595	27	16	0.5584	55	15	0.929845	0.120958	1.10084	0.886392	0.145039	1.18195	1.21922	2.02394e-06	1.05651	1.06122	0.0940919	1.07447	0.831048	7.68434e-05	1.07609	1.0366	0.377277	1.08825	0.920806	0.0911991	1.10373	0.906136	0.124506	1.13778	1.17202	0.110618	1.22128	1.14923	0.0186583	1.11612	1.16416	0.0226616	1.13604	1.30259	0.0368973	1.27871	1.0185
ENSMUSP00000014499	ENSMUSG00000014355	Anapc1	P53995 "Anaphase-promoting complex subunit 1 (APC1)(Cyclosome subunit 1)(Testis-specific gene 24 protein)(Mitotic checkpoint regulator)"	0.2022	76	11	0.08282	25	5	0.1718	61	5	0.954265	0.596274	1.21	0.898374	0.221544	1.22832	1.17297	0.008977	1.09774	0.964067	0.592353	1.15883	1.02776	0.586972	1.13753	1.10458	0.237738	1.22027	0.873145	0.180661	1.23369	0.922035	0.0960222	1.10953	0.935139	0.71936	1.62039	0.849558	0.14651	1.25954	0.902042	0.110498	1.15033	0.914637	0.281815	1.22055	0.869238
ENSMUSP00000025217	ENSMUSG00000024359	Hspa9	P38647 "Stress-70 protein, mitochondrial Precursor (75 kDa glucose-regulated protein)(GRP-75)(Heat shock 70 kDa protein 9)(Peptide-binding protein 74)(PBP74)(p66 MOT)(Mortalin)"	0.3579	43	8	0.3181	30	8	0.4963	47	7	1.0737	0.261297	1.14755	1.34164	0.15916	1.55456	0.942051	0.0562695	1.06385	1.21607	0.124843	1.30398	1.12334	0.332301	1.3023	1.08168	0.0238378	1.06601	0.917404	0.455944	1.29482	0.91435	0.00515749	1.0543	1.04087	0.679634	1.25352	0.93867	0.618534	1.33293	1.05208	0.41302	1.14794	0.948776	0.374221	1.14346	1.0367
ENSMUSP00000120736	ENSMUSG00000006333	Rps9	004 "ribosomal protein S9 Gene [Source:MGI (curated);Acc:MGI:1924096]" "MGI_curated_transcript"	0.6598	38	10	0.4639	16	7	0.701	34	11	1.38495	0.130929	1.55785	1.22794	0.26774	1.50889	1.05233	0.00313459	1.02984	1.21449	0.40915	1.66156	1.07324	0.185793	1.12274	1.01663	0.525036	1.05738	1.31307	0.278449	1.70599	1.141	0.184205	1.24003	1.24016	0.530071	2.09027	1.28879	0.290815	1.66759	1.11586	0.382114	1.32909	1.34832	0.26469	1.75684	1.31953
ENSMUSP00000001809	ENSMUSG00000022283	Pabpc1	P29341 "Polyadenylate-binding protein 1 (Poly(A)-binding protein 1)(PABP-1)"	0.3947	51	12	0.3774	42	8	0.6069	78	9	1.12692	0.047233	1.12496	1.42465	0.0175411	1.31101	0.888226	0.00175774	1.06123	1.11145	0.0327267	1.09993	1.04194	0.129622	1.05822	1.13277	0.00292001	1.07052	1.21446	0.0172787	1.16502	1.2864	0.0936595	1.35956	0.679507	0.10519	1.62874	1.17581	0.0583894	1.18387	1.54329	0.00205446	1.24048	1.14911	0.227595	1.27796	1.20535
ENSMUSP00000029860	ENSMUSG00000028207	Asph	Q9EQ66;Q9EQ67 "Aspartly beta-hydroxylase ";"Aspartyl beta-hydroxylase Humbug splice variant "	0.2607	42	12	0.1338	13	6	0.4207	45	8	1.37491	1.59944e-05	1.10117	1.37957	0.0395129	1.34851	1.36393	4.52746e-05	1.08579	0.992885	0.878084	1.10638	1.01562	0.528007	1.06056	1.02919	0.268789	1.0583	0.991254	0.899555	1.16147	1.13932	0.0615589	1.1499	1.14887	0.290535	1.33256	1.17658	0.000585163	1.078	1.24562	0.0673846	1.27451	1.31182	0.0210799	1.24209	1.20208
ENSMUSP00000005503	ENSMUSG00000005370	Msh6	P54276 "DNA mismatch repair protein Msh6 (MutS-alpha 160 kDa subunit)(G/T mismatch-binding protein)(GTMBP)(GTBP)(p160)"	0.1826	56	10	0.1605	34	13	0.3675	82	8	0.992925	0.881395	1.1103	0.920415	0.398667	1.22935	1.13504	0.00207882	1.06507	0.925569	0.19235	1.13218	0.814895	0.000368729	1.09539	0.945785	0.193396	1.09595	0.796806	0.0170497	1.19244	0.781039	1.01284e-05	1.07709	1.03848	0.802401	1.40991	1.0771	0.152604	1.11352	1.02799	0.698658	1.16378	1.17557	0.164936	1.2798	0.821154
ENSMUSP00000006754	ENSMUSG00000020923	Ubtf	A2AWT7;Q9DBH1 "Upstream binding transcription factor, RNA polymerase IUpstream binding transcription factor, RNA polymerase I, isoform CRA_b ;";"Putative uncharacterized protein "	0.3377	51	11	0.3138	37	13	0.3391	44	4	0.929368	0.486157	1.25318	0.863469	0.00963354	1.10964	0.920509	0.387275	1.29848	1.07883	0.464261	1.2488	1.17606	4.75056e-05	1.05888	1.04197	0.263353	1.09997	1.04979	0.747771	1.38747	0.902475	0.136894	1.15058	1.07284	0.51326	1.35335	0.922417	0.533793	1.32208	0.819134	0.00133428	1.11029	0.906638	0.293793	1.27847	1.08253
ENSMUSP00000087184	ENSMUSG00000053754	Chd8	Q09XV5 "Chromodomain-helicase-DNA-binding protein 8 (CHD-8)(EC 3.6.1.-)(ATP-dependent helicase CHD8)(Axis duplication inhibitor)(Duplin)"	0.1696	95	9	0.09644	44	11	0.2517	123	6	0.853643	0.00723745	1.10745	0.890431	0.0366814	1.11325	0.874581	0.0221596	1.11106	0.989184	0.735063	1.07418	1.06716	0.583343	1.29111	1.00989	0.773901	1.08705	0.873925	0.0712482	1.16124	0.92775	0.105188	1.09833	0.826069	0.32258	1.5648	0.995289	0.871544	1.0674	1.04214	0.509695	1.14398	0.926548	0.380002	1.22603	0.946449
ENSMUSP00000010349	ENSMUSG00000010205	Raver1	Q9CW46 "Ribonucleoprotein PTB-binding 1 (Protein raver-1)"	0.3422	39	9	0.3008	31	8	0.6497	65	12	0.997176	0.987533	1.4983	0.898078	0.405586	1.33283	0.893356	0.0164311	1.09173	0.85494	0.3526	1.44225	0.95187	0.137405	1.07203	0.993121	0.904543	1.13179	0.961086	0.817553	1.46801	0.991983	0.795799	1.07337	0.98278	0.921172	1.45877	1.05397	0.741619	1.42631	0.970814	0.785654	1.2813	0.924317	0.302218	1.17354	1.05624
ENSMUSP00000001544	ENSMUSG00000023186	Vwa5a	Q99KC8 "von Willebrand factor A domain-containing protein 5A (Loss of heterozygosity 11 chromosomal region 2 gene A protein homolog)"	0.2282	42	11	0.1892	19	7	0.227	37	1	0.697758	5.14813e-05	1.12647	0.567436	8.37435e-05	1.15945	0.926008			0.89908	0.163772	1.17083	0.813623	0.000505884	1.07736	1.08956			0.773871	0.0180183	1.2241	0.810141	7.2966e-05	1.05512	1.65438			0.600181	3.43065e-05	1.17464	0.502858	5.18861e-06	1.11732	0.862314			0.734829
ENSMUSP00000078339	ENSMUSG00000061062	AC163648.2	AC163648.2 AC163648.2-201 "null" "Clone_based_ensembl_transcript"	0.3485	33	6	0.4191	39	11	0.5332	42	3	1.07679	0.892275	3.8004	0.846596	0.442931	1.59114	0.946391	0.498734	1.33563	1.13625	0.825816	4.12149	1.00977	0.799292	1.08653	1.02109	0.846338	1.50446	1.0019	0.998242	8.25089	0.922403	0.687006	1.5431	1.40242	0.729392	38.892	1.03133	0.959767	4.46228	0.888075	0.530444	1.50226	1.03668	0.930081	4.77668	1.15068
ENSMUSP00000004375	ENSMUSG00000004264	Phb2	O35129 "Prohibitin-2 (B-cell receptor-associated protein BAP37)(Repressor of estrogen receptor activity)"	0.6388	44	12	0.5284	26	11	0.8294	48	13	1.23788	0.00928504	1.16094	1.27119	0.000666301	1.11641	0.908409	0.0374907	1.09364	1.20179	0.0429512	1.19345	1.15845	0.00027361	1.06176	1.25489	0.000120961	1.09281	1.38271	0.00306391	1.20785	1.53658	8.53764e-06	1.12226	1.05234	0.714414	1.34538	1.23181	0.0482082	1.2294	1.49205	4.37931e-05	1.13868	1.32135	0.00085754	1.14778	1.46
ENSMUSP00000074216	ENSMUSG00000060680	Myl6	Q60605 "Myosin light polypeptide 6 (Smooth muscle and nonmuscle myosin light chain alkali 6)(Myosin light chain alkali 3)(Myosin light chain A3)(Myosin light chain 3)(MLC-3)(17 kDa myosin light chain)(LC17)"	0.7351	28	6	0.6689	22	7	0.7219	25	5	0.834037	0.435978	1.73547	0.810335	0.393146	1.74977	0.997787	0.89636	1.04532	1.23976	0.425658	1.89159	0.582411	0.00018108	1.17576	1.09998	0.04603	1.09698	0.368914	0.00454093	1.69052	0.702007	0.00261561	1.19174	0.730622	0.351974	2.28842	0.988757	0.968422	2.01111	1.01234	0.953739	1.64266	0.851522	0.270797	1.41835	0.953615
ENSMUSP00000030207	ENSMUSG00000028484	Psip1	Q99JF8 "PC4 and SFRS1-interacting protein (Lens epithelium-derived growth factor)(mLEDGF)"	0.4489	45	9	0.5303	39	17	0.6042	62	8	0.83122	0.155782	1.31267	1.00535	0.964557	1.28478	0.952262	0.194803	1.08404	0.972426	0.793994	1.26974	1.08057	0.00446328	1.05095	1.07283	0.109963	1.09512	0.795248	0.0702299	1.2879	0.818937	0.000605085	1.10465	0.91312	0.739022	1.85898	1.03233	0.771972	1.27729	1.23443	0.0792621	1.26898	1.25356	0.105068	1.33269	0.97818
ENSMUSP00000120071	ENSMUSG00000021963	Sap18	Q4FZH3 "Putative uncharacterized proteinSin3-associated polypeptide 18MCG49778 ;;"	0.6163	27	10	0.5291	17	7	0.8779	30	8	0.883217	0.328207	1.31222	0.917141	0.161001	1.14155	0.908277	0.00225724	1.0498	0.947167	0.643456	1.29227	1.07512	0.00424537	1.04047	1.05313	0.404992	1.14817	0.967401	0.813635	1.36181	0.975894	0.377491	1.06468	1.06122	0.839907	1.95486	1.01582	0.897998	1.30892	0.975915	0.295244	1.05341	0.985342	0.822844	1.16212	1.01595
ENSMUSP00000021824	ENSMUSG00000021392	Nol8	Q3UHX0 "Nucleolar protein 8 "	0.2215	46	10	0.1305	26	8	0.2395	55	5	1.07009	0.279969	1.1426	0.963593	0.62491	1.18716	1.06885	0.130763	1.10237	1.03387	0.467055	1.1043	1.00092	0.975085	1.06943	0.832436	0.0621456	1.21932	1.07641	0.292569	1.16066	1.00105	0.976453	1.08448	1.33032	0.165512	1.59635	1.05739	0.317045	1.12655	0.995727	0.94681	1.15776	1.03513	0.678286	1.23943	1.14857
ENSMUSP00000096734	ENSMUSG00000025369	Smarcc2	Q3UID0 "Putative uncharacterized protein "	0.2947	56	12	0.3575	53	11	0.3805	62	6	0.985074	0.912012	1.34009	1.1636	0.342507	1.40322	1.12705	0.0787532	1.14977	0.757523	0.115874	1.43059	1.07841	0.0347746	1.07132	0.977544	0.457374	1.07523	0.794392	0.14894	1.38601	1.0345	0.382499	1.08625	1.18627	0.276193	1.43247	0.719707	0.0533486	1.39733	0.869041	0.317397	1.34605	0.931453	0.207372	1.13441	0.835458
ENSMUSP00000113219	ENSMUSG00000027940	Tpm3	005 "tropomyosin 3, gamma Gene [Source:MGI (curated);Acc:MGI:1890149]" "MGI_curated_transcript"	0.5444	31	8	0.5444	21	7				1.12352	0.207512	1.2194	1.5104	0.216475	2.07636				0.839102	0.179281	1.32053	1.05967	0.046094	1.0582				1.15992	0.151019	1.24317	1.3253	0.0276678	1.26923				1.36609	0.0202094	1.27979	1.36279	0.308401	1.97523				1.06215
ENSMUSP00000064515	ENSMUSG00000056305	Usp39	Q3TIX9 "U4/U6.U5 tri-snRNP-associated protein 2 (Inactive ubiquitin-specific peptidase 39)"	0.2979	36	10	0.1968	14	5	0.3883	42	6	1.17399	0.321555	1.41329	0.760291	0.0173011	1.21441	0.820094	0.0247189	1.17431	1.38811	0.0782362	1.4527	1.12663	0.017619	1.0887	1.03488	0.235646	1.0676	1.34185	0.152502	1.53045	0.901721	0.00252107	1.04351	0.601055	0.208217	2.47461	1.24026	0.198629	1.42047	0.796528	0.0244554	1.19653	0.690448	0.379115	2.68436	1.44457
ENSMUSP00000021046	ENSMUSG00000020705	Ddx42	Q810A7 "ATP-dependent RNA helicase DDX42 (EC 3.6.1.-)(DEAD box protein 42)"	0.2928	40	12	0.1916	24	9	0.4467	58	11	1.20644	0.134932	1.29496	0.891058	0.421139	1.36848	0.901819	1.33671e-05	1.02963	1.38906	0.0572035	1.4064	1.04377	0.0705935	1.04853	0.960526	0.0812026	1.04736	1.50028	0.048077	1.49374	1.03788	0.517956	1.13519	0.804079	0.499438	2.00031	1.23407	0.20833	1.42049	0.7883	0.0939835	1.33472	0.775442	0.197333	1.50724	1.27955
ENSMUSP00000102031	ENSMUSG00000032777	Gtf3c1	Q8K284 "General transcription factor 3C polypeptide 1 (Transcription factor IIIC subunit alpha)(TF3C-alpha)(Transcription factor IIIC 220 kDa subunit)(TFIIIC 220 kDa subunit)(TFIIIC220)(TFIIIC box B-binding subunit)"	0.189	86	14	0.09676	32	8	0.2937	104	5	1.00035	0.993799	1.10088	1.06668	0.606447	1.32725	1.08917	0.0845503	1.10947	0.931359	0.205718	1.12222	0.998236	0.982844	1.20608	0.93611	0.169703	1.1158	0.906371	0.106216	1.13012	0.969404	0.770151	1.27372	0.783646	0.643959	3.88146	0.880646	0.0334866	1.12242	0.991665	0.958325	1.4413	0.828622	0.193013	1.39628	0.941515
ENSMUSP00000021048	ENSMUSG00000020706	Ftsj3	Q9DBE9 "Putative rRNA methyltransferase 3 (EC 2.1.1.-)(rRNA (uridine-2'-O-)-methyltransferase 3)(Protein ftsJ homolog 3)"	0.3771	59	10	0.2279	25	7	0.4702	62	7	0.881074	0.147743	1.19987	0.8349	0.375211	1.58576	1.06003	0.126006	1.08362	0.877736	0.303193	1.3143	0.991065	0.864015	1.13073	0.76509	0.00253623	1.14103	0.982438	0.925559	1.52767	1.00776	0.951904	1.35116	1.32654	0.00536635	1.17657	0.994511	0.966447	1.33976	0.952761	0.829322	1.69196	1.16651	0.00849015	1.10293	1.20115
ENSMUSP00000097078	ENSMUSG00000021500	Ddx46	Q569Z5 "Probable ATP-dependent RNA helicase DDX46 (EC 3.6.1.-)(DEAD box protein 46)"	0.3304	63	11	0.28	40	13	0.4641	101	7	0.93071	0.356893	1.18015	0.993969	0.915574	1.12946	1.11524	0.00412758	1.06118	0.779038	0.0183329	1.21855	1.00125	0.980587	1.11602	0.958329	0.375138	1.11487	0.967938	0.817471	1.35852	1.04782	0.312433	1.10135	1.09763	0.835959	2.86935	0.869069	0.150517	1.22239	0.841351	0.0207626	1.15196	1.00557	0.981985	1.78223	0.993816
ENSMUSP00000047397	ENSMUSG00000039148	Sart1	Q9Z315 "U4/U6.U5 tri-snRNP-associated protein 1 (Squamous cell carcinoma antigen recognized by T-cells 1)(SART-1)(mSART-1)(Hypoxia-associated factor)"	0.3474	55	12	0.3536	32	15	0.5372	68	13	0.873758	0.0194686	1.1148	0.829935	0.00336428	1.12012	0.775125	3.97097e-05	1.09216	0.90653	0.098424	1.12708	1.03736	0.326743	1.08049	0.911468	4.84676e-05	1.03331	1.09822	0.145046	1.1405	0.928667	0.144391	1.10813	0.924409	0.3575	1.196	0.95436	0.293001	1.09757	0.853058	0.00170077	1.0921	0.81502	0.00330235	1.12973	1.00463
ENSMUSP00000043123	ENSMUSG00000037364	Srrt	Q99MR6 "Serrate RNA effector molecule homolog (Arsenite-resistance protein 2)"	0.3223	59	11	0.304	40	15	0.464	90	7	0.913274	0.469753	1.30867	0.958969	0.296315	1.08637	0.887227	0.0166633	1.09315	0.877511	0.346308	1.34254	1.05611	0.279232	1.10964	0.907313	0.0809084	1.12025	1.12719	0.397626	1.3524	1.05595	0.267682	1.10647	1.05221	0.93477	4.30367	0.927857	0.570005	1.32849	0.940692	0.139358	1.08727	0.9512	0.864085	1.98426	0.955227
ENSMUSP00000001226	ENSMUSG00000022436	Sh3bp1	A2A5V1;A2A5V4 "SH3-domain binding protein 1 Fragment ";"SH3-domain binding protein 1 "	0.3206	34	11	0.2059	20	10	0.4309	46	9	0.808628	0.045386	1.22996	0.738807	0.00430264	1.1982	0.914699	0.0243729	1.07711	0.960441	0.484331	1.13335	1.00887	0.860865	1.11713	1.08997	0.141986	1.12972	0.885881	0.192147	1.21457	0.916418	0.144115	1.13135	0.960766	0.889754	1.90599	0.855542	0.0556124	1.17426	0.789001	0.00533526	1.1583	0.907388	0.268877	1.2076	0.886292
ENSMUSP00000040724	ENSMUSG00000037286	Stag1	Q9D3E6 "Cohesin subunit SA-1 (Stromal antigen 1)(SCC3 homolog 1)"	0.2202	68	7	0.1256	26	2	0.2854	66	8	0.826555	0.00317362	1.10321	0.903293	0.369214	2.33173	0.940975	0.128171	1.08699	0.736652	0.000276041	1.10384	0.849411	0.231114	2.19848	0.849023	0.00864127	1.11323	0.717794	0.0019006	1.16677	0.801306	0.117453	1.69087	0.675851	0.0583192	1.50676	0.811745	0.0013471	1.09494	0.918212	0.137735	1.26908	0.781542	0.0328494	1.24585	0.837301
ENSMUSP00000123088	ENSMUSG00000027201	Myef2	NP_001155889.1 "myelin expression factor 2 isoform 1 "	0.3333	34	8	0.3418	41	10	0.533	50	9	1.16773	0.00621911	1.09969	1.04815	0.430345	1.13752	1.09181	0.0367784	1.08429	1.51417	0.000152758	1.14231	1.52727	1.36436e-05	1.11935	1.39968	8.45653e-05	1.1122	1.84677	3.57897e-06	1.1174	1.6218	7.11218e-05	1.17193	1.35022	0.0583337	1.36849	1.5933	9.64866e-05	1.14905	1.36436	0.00261379	1.18619	1.30896	0.00337401	1.16291	1.56291
ENSMUSP00000022529	ENSMUSG00000021957	Tkt	P40142 "Transketolase (TK)(EC 2.2.1.1)(P68)"	0.2953	40	10	0.2488	20	8	0.4976	56	11	0.936132	0.487632	1.2291	1.12255	0.399838	1.35663	0.841343	0.0099429	1.12898	1.29375	0.0163166	1.21862	0.964481	0.669114	1.21143	1.223	0.066579	1.24347	0.914841	0.263297	1.186	0.871097	0.027634	1.12498	0.803245	0.478813	1.9416	1.26967	0.0298602	1.23319	1.44749	0.0425739	1.42407	0.939084	0.768947	1.59026	0.946385
ENSMUSP00000119603	ENSMUSG00000038845	1700071K01Rik	Q3V2K0;Q5SQG5 "Putative uncharacterized proteinMCG48927RIKEN cDNA 1700071K01 gene ;;";"Prohibitin Fragment "	0.5919	28	11	0.4449	15	8	0.8125	39	7	1.13574	0.185595	1.22248	1.40171	0.0163199	1.28935	0.88111	0.00361884	1.06935	1.0844	0.385181	1.22239	1.1523	0.0031874	1.07933	1.19467	0.000332059	1.06127	1.21488	0.037671	1.19819	1.56219	0.000179192	1.15807	1.41418	0.0218966	1.31795	1.1686	0.120526	1.22817	1.5848	0.000622668	1.20413	1.43239	0.00016106	1.11115	1.32591
ENSMUSP00000020562	ENSMUSG00000007739	Cct4	P80315 "T-complex protein 1 subunit delta (TCP-1-delta)(CCT-delta)(A45)"	0.3896	42	8	0.4026	30	13	0.6753	60	16	0.875017	0.0142176	1.1023	0.941263	0.187211	1.09889	1.34101	6.38004e-11	1.03929	0.907274	0.104874	1.13155	0.792951	5.40981e-05	1.08654	0.996095	0.843423	1.04236	0.89342	0.0512454	1.12021	0.903347	0.0164639	1.08275	1.28903	0.00236116	1.15969	1.0651	0.267863	1.13194	1.17744	0.000607594	1.08039	1.26616	6.60113e-06	1.07743	0.879393
ENSMUSP00000021574	ENSMUSG00000021149	Gtpbp4	Q99ME9 "Nucleolar GTP-binding protein 1 (Chronic renal failure gene protein)(GTP-binding protein NGB)"	0.3754	44	11	0.3565	33	20	0.4921	46	15	1.00696	0.978141	1.73258	0.907152	0.233737	1.18037	1.00401	0.872537	1.05396	0.974428	0.927127	1.85028	1.03953	0.108643	1.04937	0.725313	1.84727e-07	1.07553	0.973581	0.898862	1.58025	0.967247	0.57158	1.12871	1.9085	0.130976	2.37307	1.05533	0.834624	1.75048	0.976183	0.745542	1.16558	1.65537	0.0548547	1.67547	1.34806
ENSMUSP00000033776	ENSMUSG00000031403	Dkc1	Q9ESX5 "H/ACA ribonucleoprotein complex subunit 4 (EC 5.4.99.-)(Dyskerin)(Nucleolar protein family A member 4)(snoRNP protein DKC1)(Nopp140-associated protein of 57 kDa)(Nucleolar protein NAP57)"	0.4244	43	11	0.391	34	15	0.5972	50	12	0.986438	0.880445	1.21796	0.840279	0.0346641	1.173	1.02251	0.16778	1.03373	0.986475	0.826024	1.14392	1.00645	0.881579	1.09522	0.979341	0.514784	1.07065	1.05581	0.52906	1.20391	0.93587	0.413992	1.18396	1.22923	0.323505	1.5519	1.07589	0.354936	1.18296	0.907669	0.125477	1.136	1.15008	0.190708	1.24696	1.15994
ENSMUSP00000008477	ENSMUSG00000008333	Snrpb2	Q9CQI7 "U2 small nuclear ribonucleoprotein B'' (U2 snRNP B'')"	0.52	26	7	0.4178	20	5	0.4889	18	3	1.30367	0.126552	1.44187	0.939429	0.329492	1.16925	1.08081	0.149729	1.15762	1.24956	0.228669	1.50193	0.987552	0.750722	1.10757	1.077	0.657882	1.85875	1.37692	0.221303	1.77447	0.95399	0.294511	1.11458	0.919273	0.735001	2.53932	1.40856	0.115485	1.57735	0.955963	0.395966	1.14067	0.993584	0.898655	1.21199	1.4933
ENSMUSP00000036288	ENSMUSG00000034024	Cct2	P80314 "T-complex protein 1 subunit beta (TCP-1-beta)(CCT-beta)"	0.4636	38	10	0.2692	21	7	0.7308	59	16	0.903652	0.309389	1.24018	0.898618	0.328026	1.27853	1.27195	3.38641e-07	1.06126	0.983953	0.844754	1.1991	0.821677	0.174677	1.36649	1.18669	0.00456116	1.11573	0.829327	0.35098	1.54608	0.909123	0.363183	1.2674	0.890439	0.616328	1.62139	1.10183	0.267903	1.20659	1.16429	0.0290466	1.13933	1.07036	0.660765	1.38218	0.900194
ENSMUSP00000110004	ENSMUSG00000079553	CT030732.1	CT030732.1 Q9QWT9 "Kinesin-like protein KIFC1 "	0.3689	39	10	0.2311	27	1				1.01144	0.852999	1.14438	0.870592						0.938416	0.305868	1.14161	1.01299						0.92119	0.15823	1.12825	0.871396						0.969139	0.51251	1.1096	0.957186						1.12067
ENSMUSP00000030014	ENSMUSG00000028330	AU014645	Q3UYV9 "Nuclear cap-binding protein subunit 1 (80 kDa nuclear cap-binding protein)(NCBP 80 kDa subunit)(CBP80)"	0.3051	57	8	0.2013	25	8	0.4608	54	12	0.87625	0.246845	1.28051	0.918324	0.116894	1.11929	1.0346	0.168943	1.05217	0.780184	0.0603109	1.30003	1.1216	0.0835394	1.14405	1.01876	0.715083	1.11537	0.90848	0.524739	1.40374	0.952135	0.637912	1.26601	1.06119	0.744144	1.4778	0.863582	0.285405	1.34975	0.945849	0.230088	1.10535	1.13785	0.0773513	1.15708	0.839107
ENSMUSP00000032561	ENSMUSG00000030403	Vasp	P70460 "Vasodilator-stimulated phosphoprotein (VASP)"	0.408	39	11	0.384	15	8	0.344	31	8	1.0807	0.579062	1.35198	1.031	0.673231	1.17832	0.703237	0.000230303	1.12816	1.24772	0.232119	1.47347	1.12261	0.00935794	1.08012	1.04316	0.0882287	1.05177	1.01566	0.920653	1.40339	1.03521	0.447045	1.10695	1.06268	0.737317	1.50965	1.22925	0.257982	1.46725	0.869826	0.053157	1.15256	1.18417	0.155596	1.28564	1.46072
ENSMUSP00000043583	ENSMUSG00000037608	Bclaf1	Q8K019 "Bcl-2-associated transcription factor 1 (Btf)"	0.3351	52	12	0.2622	44	13	0.4178	75	7	1.0255	0.853969	1.34187	0.937006	0.628259	1.33022	0.989001	0.734801	1.07923	0.997702	0.989954	1.48149	1.12384	0.00139433	1.06353	0.925849	0.0376067	1.07349	1.50894	0.0531204	1.51892	1.11585	0.0512685	1.11665	1.03421	0.900187	1.87603	1.13425	0.520479	1.51845	1.03906	0.749183	1.29076	1.00177	0.986916	1.28837	1.19005
ENSMUSP00000007272	ENSMUSG00000045545	Krt14	Q61781 "Keratin, type I cytoskeletal 14 (Cytokeratin-14)(CK-14)(Keratin-14)(K14)"	0.405	33	0
ENSMUSP00000103940	ENSMUSG00000037563	Rps16	P14131 "40S ribosomal protein S16 "	0.6506	22	8	0.726	17	11	0.7661	31	9	1.49797	0.0838183	1.60712	1.33629	0.267918	1.73422	1.09604	0.000563591	1.03909	1.30329	0.287065	1.7224	1.08973	0.123212	1.12044	1.07844	0.0112239	1.05456	1.46171	0.129992	1.68771	1.2089	0.0107593	1.14477	0.930084	0.801089	1.89972	1.3379	0.255834	1.74433	1.24977	0.352898	1.66509	1.21523	0.447968	1.75659	1.46904
ENSMUSP00000111121	ENSMUSG00000045983	Eif4g1	Q3UQI5;Q3UZD9;Q6EVH9;Q6PD42;Q8BUW8;Q8K0J8;Q8R2V4 "Putative uncharacterized protein Fragment ";"Putative uncharacterized protein Fragment ";"EIF4GI protein Fragment ";"Eif4g1 protein Fragment ";"Putative uncharacterized protein Fragment ";"Eif4g1 protein ";"Eif4g1 protein Fragment "	0.2331	87	10	0.2006	52	8	0.3425	104	6	0.983413	0.806887	1.16216	1.36802	0.000554758	1.132	0.994624	0.914055	1.12987	0.979204	0.761834	1.16434	1.03193	0.47622	1.10382	1.04218	0.226086	1.08001	0.927696	0.252909	1.1491	1.25486	0.00187933	1.11734	1.01483	0.899386	1.32936	1.09981	0.164692	1.1529	1.4837	4.70715e-05	1.111	1.10629	0.196803	1.19063	1.06688
ENSMUSP00000083845	ENSMUSG00000029505	Ep400	Q8CHI8 "E1A-binding protein p400 (EC 3.6.1.-)(p400 kDa SWI2/SNF2-related protein)(Domino homolog)(mDomino)"	0.1842	114	7	0.07813	32	6	0.2005	117	10	1.00531	0.968851	1.37456	0.83546	0.097703	1.25523	1.00141	0.914634	1.02944	1.0535	0.732388	1.42748	0.895107	0.177889	1.19938	0.89347	0.000514535	1.04955	1.02635	0.842068	1.35779	0.893623	0.180633	1.20435	1.01998	0.87551	1.32001	0.974437	0.741614	1.20139	0.821913	0.086975	1.26783	0.84242	0.000598193	1.07813	0.946481
ENSMUSP00000108103	ENSMUSG00000004266	Ptpn6	P29351 "Tyrosine-protein phosphatase non-receptor type 6 (EC 3.1.3.48)(Protein-tyrosine phosphatase 1C)(PTP-1C)(Hematopoietic cell protein-tyrosine phosphatase)(70Z-SHP)(SH-PTP1)(SHP-1)(PTPTY-42)"	0.3121	38	11	0.3176	25	11	0.4437	37	6	0.36133	2.56628e-06	1.24767	0.379083	0.000742318	1.5712	0.393145	0.00101528	1.41991	0.937366	0.346624	1.15874	0.883274	0.00798928	1.08736	1.08416	0.0206362	1.06425	0.633007	3.9563e-05	1.14927	0.694094	0.0575348	1.46119	0.6884	0.0303916	1.37835	0.571889	4.81102e-05	1.19044	0.6192	0.0555794	1.63744	0.673534	0.00631041	1.25237	0.703252
ENSMUSP00000063590	ENSMUSG00000052798	Nup107	Q8BH74 "Nuclear pore complex protein Nup107 (Nucleoporin Nup107)(107 kDa nucleoporin)"	0.3132	61	11	0.2268	32	12	0.487	62	15	1.05061	0.64753	1.26284	0.989421	0.871629	1.15202	1.09071	0.0449129	1.08825	0.968368	0.813593	1.3442	0.982969	0.547851	1.06287	0.951334	0.0174594	1.04052	1.05739	0.678795	1.33849	1.00151	0.957481	1.06274	1.17236	0.345525	1.41822	1.04247	0.770469	1.36223	0.92769	0.109143	1.0994	1.02032	0.740044	1.13599	1.02067
ENSMUSP00000018506	ENSMUSG00000018362	Kpna2	P52293 "Importin subunit alpha-2 (Karyopherin subunit alpha-2)(SRP1-alpha)(RAG cohort protein 1)(Pendulin)(Pore targeting complex 58 kDa subunit)(PTAC58)(Importin alpha P1)"	0.3403	41	6	0.4253	27	10	0.6597	58	14	0.864039	0.49687	1.72196	0.87947	0.0122961	1.09755	0.763972	0.000206387	1.12096	1.22001	0.388854	1.77111	1.07456	0.285467	1.154	0.772752	2.75232e-05	1.09244	1.02962	0.893027	1.76083	0.991994	0.844649	1.09434	0.603646	0.165094	2.0985	0.834016	0.427731	1.77083	1.01053	0.745487	1.07335	0.662626	0.0983462	1.64746	1.07891
ENSMUSP00000096280	ENSMUSG00000040940	Arhgef1	Q61210 "Rho guanine nucleotide exchange factor 1 (Lymphoid blast crisis-like 2)(Lbc's second cousin)"	0.291	48	10	0.1947	27	10	0.3637	63	6	0.762119	0.0215185	1.24594	0.689376	0.00171796	1.21068	0.867541	0.0156687	1.10704	0.930526	0.49475	1.26127	0.906777	0.0797791	1.11864	0.97758	0.442706	1.07248	0.840439	0.280804	1.41422	0.830055	0.0162952	1.15368	0.771589	0.464424	2.3212	0.756233	0.0204011	1.25038	0.700212	0.000361958	1.15669	0.712488	0.067674	1.45491	0.817886
ENSMUSP00000025955	ENSMUSG00000024991	Eif3a	P23116 "Eukaryotic translation initiation factor 3 subunit A (eIF3a)(Eukaryotic translation initiation factor 3 subunit 10)(eIF-3-theta)(eIF3 p167)(eIF3 p180)(eIF3 p185)(p162)(Centrosomin)"	0.3147	86	9				0.4702	111	9	1.00214	0.982919	1.24976				1.06164	0.194807	1.10238	1.04828	0.631752	1.24387				0.982247	0.571799	1.07258	1.17615	0.160846	1.27394				1.36666	0.00147397	1.16432	0.901917	0.367191	1.28284				1.16054	0.0768461	1.18426	0.983402
ENSMUSP00000033683	ENSMUSG00000031320	Rps4x	P62702 "40S ribosomal protein S4, X isoform "	0.5361	37	13	0.5665	23	15	0.8897	55	13	1.23734	0.0471288	1.23344	1.17857	0.016412	1.13803	1.11115	0.00146096	1.05755	1.03324	0.375313	1.08046	1.04377	0.0613051	1.04621	1.18232	0.00208313	1.09791	1.19141	0.0970645	1.23619	1.15146	0.0202636	1.1225	1.34939	0.102951	1.4476	1.15229	0.251156	1.29197	1.18232	0.00532736	1.11524	1.57586	0.00127372	1.26746	1.15512
ENSMUSP00000102891	ENSMUSG00000038902	Pogz	Q8BZH4 "Pogo transposable element with ZNF domain "	0.1867	56	7	0.05962	14	3	0.2122	47	3	0.953536	0.469181	1.16268	0.893746	0.294832	1.41012	0.957215	0.492819	1.25368	0.997076	0.971538	1.21249	0.939549	0.157588	1.12903	0.924276	0.0163595	1.04486	0.865708	0.0258638	1.12741	0.894967	0.0537278	1.1223	0.632363	0.334177	4.7711	0.988299	0.851793	1.15913	0.965169	0.573252	1.25683	0.838664	0.423754	2.13671	0.881218
ENSMUSP00000003912	ENSMUSG00000003814	Calr	P14211 "Calreticulin Precursor (CRP55)(Calregulin)(HACBP)(Endoplasmic reticulum resident protein 60)(ERp60)"	0.3101	23	10	0.363	21	8				1.17588	0.306828	1.40254	1.03812	0.830803	1.49022				1.86452	0.00390691	1.44202	1.25828	0.0020143	1.12041				1.78186	0.01954	1.58533	1.48978	0.0361643	1.43992				1.37702	0.0654173	1.41208	1.1662	0.255556	1.34133				2.25547
ENSMUSP00000039110	ENSMUSG00000036371	Serbp1	Q9CY58 "Plasminogen activator inhibitor 1 RNA-binding protein (PAI1 RNA-binding protein 1)(PAI-RBP1)(SERPINE1 mRNA-binding protein 1)"	0.43	29	10	0.5528	26	11	0.7027	52	8	0.937828	0.437003	1.19544	1.26281	0.00399728	1.15014	0.785916	4.54353e-07	1.03273	0.935033	0.5546	1.28093	1.13797	0.000862668	1.06341	1.06502	0.0134259	1.04642	0.949367	0.7803	1.5052	1.18425	4.4812e-07	1.03341	0.908323	0.666113	1.65702	0.946378	0.658297	1.3134	1.19887	0.00376557	1.11369	1.10513	0.344394	1.26261	1.05727
ENSMUSP00000001460	ENSMUSG00000001424	Snd1	Q78PY7 "Staphylococcal nuclease domain-containing protein 1 (p100 co-activator)(100 kDa coactivator)"	0.2912	47	8	0.2648	36	10	0.4033	68	10	1.0974	0.295987	1.21489	1.29119	0.00126678	1.13351	0.90738	0.0136543	1.07459	1.1498	0.243422	1.29587	1.17538	0.00131276	1.08293	1.35976	7.6613e-07	1.0596	1.03234	0.853298	1.48039	1.05748	0.493217	1.19364	1.04994	0.6573	1.27161	1.1129	0.299122	1.25307	1.25555	0.00259253	1.13304	1.2784	0.00266526	1.14501	1.13178
ENSMUSP00000104301	ENSMUSG00000018474	Chd3	B1AR17;O35327;Q7TML9;Q8K0T3 "Chromodomain helicase DNA binding protein 3 ";"Proline-rich protein 7 Fragment ";"Chd3 protein ";"Chd3 protein "	0.2813	115	12	0.1689	61	4	0.4594	154	5	0.888373	0.11955	1.1669	0.712611	0.082792	1.52224	0.856461	0.168989	1.29252	0.921061	0.313893	1.18708	0.86169	0.119648	1.24528	1.01916	0.861529	1.32751	0.824919	0.0019213	1.11032	0.72114	0.0427521	1.35907	0.659791	0.255093	2.38615	0.840008	0.111069	1.24792	0.654114	0.0297572	1.41283	0.721216	0.195671	1.79438	0.921683
ENSMUSP00000101970	ENSMUSG00000028729	Ebna1bp2	A2ACZ1 "EBNA1 binding protein 2 Fragment "	0.4314	35	12	0.4967	23	15	0.4412	31	6	0.956359	0.696693	1.27816	1.04316	0.532563	1.15216	1.17714	0.0836491	1.21473	0.911895	0.413016	1.26947	1.0245	0.459825	1.0707	0.74403	0.000821407	1.11187	1.07882	0.646731	1.42533	1.02406	0.792034	1.20891	0.817732	0.601578	2.53172	1.14188	0.235958	1.2623	1.18006	0.0265835	1.15411	1.42266	0.00398019	1.19718	1.26476
ENSMUSP00000071422	ENSMUSG00000027933	Ints3	Q7TPD0 "Integrator complex subunit 3 (Int3)(SOSS complex subunit A)(Sensor of single-strand DNA complex subunit A)(Sensor of ssDNA subunit A)(SOSS-A)"	0.3055	75	11	0.1153	19	6	0.3718	63	7	0.833541	0.163261	1.30938	0.843457	0.276764	1.43145	0.986457	0.900163	1.29043	0.778796	0.134718	1.40815	1.1594	0.131715	1.23518	1.36342	0.182243	1.65363	0.816169	0.206736	1.39824	0.955697	0.673634	1.29782	1.15978	0.207665	1.29291	0.76589	0.123059	1.42311	0.80135	0.0944865	1.31844	1.00793	0.952992	1.36965	0.740433
ENSMUSP00000032735	ENSMUSG00000030521	Mphosph10	Q810V0 "U3 small nucleolar ribonucleoprotein protein MPP10 (M phase phosphoprotein 10)"	0.2717	39	9	0.1733	20	4				1.02566	0.86404	1.39158	1.09616	0.12654	1.14925				0.865788	0.372198	1.42131	1.01889	0.723874	1.16581				0.969998	0.805634	1.31806	0.99385	0.924565	1.21026				0.972142	0.851947	1.40212	1.11462	0.0273207	1.08927				1.12451
ENSMUSP00000079356	ENSMUSG00000058773	Hist1h1b	P43276 "Histone H1.5 (H1 VAR.5)(H1b)"	0.5605	42	7	0.7175	70	7	0.7803	59	7	0.896771	0.717832	2.02124	0.878162	0.572437	1.7035	0.9828	0.728649	1.12386	0.794321	0.487362	2.14186	0.842806	0.00402179	1.09703	0.952975	0.40595	1.14099	0.903337	0.76868	2.24418	0.842979	0.0659509	1.20471	0.954872	0.890065	2.18942	0.936758	0.851966	2.27182	0.853835	0.482593	1.67659	0.737197	0.279883	1.87434	1.04074
ENSMUSP00000065987	ENSMUSG00000037149	Ddx1	Q91VR5 "ATP-dependent RNA helicase DDX1 (EC 3.6.1.-)(DEAD box protein 1)"	0.2676	43	9	0.2162	18	9	0.3216	37	7	0.942344	0.520223	1.22585	0.976609	0.68838	1.14021	0.918656	0.00710916	1.05326	0.962297	0.431594	1.11295	1.00258	0.914816	1.05526	1.03275	0.282838	1.06914	0.931146	0.570311	1.32044	1.13597	0.00632081	1.08343	1.09775	0.0644075	1.10617	1.03872	0.689002	1.23496	1.23342	0.00115345	1.10317	1.1022	0.106933	1.1339	0.907957
ENSMUSP00000060613	ENSMUSG00000033285	Wdr3	Q8BHB4 "WD repeat-containing protein 3 "	0.2272	47	10	0.2197	25	10	0.3556	47	8	0.892511	0.116441	1.15964	0.944821	0.337444	1.1351	1.02848	0.531327	1.10614	0.72495	0.000396272	1.14232	0.993222	0.704349	1.04005	0.796781	0.00122115	1.10833	0.805051	0.0153	1.17854	0.942337	0.40569	1.1665	1.14587	0.146241	1.21782	0.80464	0.0189895	1.18806	0.974605	0.476951	1.08156	1.15786	0.0356528	1.14288	0.863742
ENSMUSP00000054548	ENSMUSG00000041815	Poldip3	Q8BG81 "Polymerase delta-interacting protein 3 "	0.4929	38	10	0.4238	26	12	0.531	40	6	0.941848	0.389328	1.16392	0.882555	0.260858	1.2611	0.770966	0.00345159	1.13709	1.10881	0.115547	1.14355	1.06209	0.103613	1.07757	0.995891	0.809288	1.04248	1.03296	0.745815	1.24961	0.928232	0.147887	1.11106	0.601211	0.27198	2.8862	0.959576	0.579136	1.17894	0.866691	0.0643305	1.16553	0.742187	0.203211	1.68842	1.12061
ENSMUSP00000024783	ENSMUSG00000023988	Bysl	O54825 "Bystin "	0.3486	33	10	0.2294	18	3	0.4748	40	4	0.889042	0.109274	1.16149	0.973315	0.572242	1.18994	0.954357	0.24398	1.10828	0.891635	0.124028	1.16525	1.02559	0.0262885	1.01815	0.895011	0.269754	1.29873	0.868751	0.0497353	1.15084	0.936016	0.344585	1.26092	0.605936	0.482497	7.34586	0.949731	0.464142	1.16487	0.955425	0.24846	1.12951	0.824737	0.259715	1.55625	0.99923
ENSMUSP00000049528	ENSMUSG00000030779	Rbbp6	P97868 "Retinoblastoma-binding protein 6 (p53-associated cellular protein of testis)(Proliferation potential-related protein)(Protein P2P-R)"	0.1849	67	11	0.1453	36	8				1.0953	0.260398	1.18531	1.0035	0.978175	1.33883				1.14613	0.105045	1.18591	1.13207	0.0794016	1.15377				1.35139	0.0135235	1.25136	1.02679	0.750111	1.20774				1.18941	0.0462259	1.18521	1.04124	0.58245	1.18036				1.24101
ENSMUSP00000055254	ENSMUSG00000029823	Luc7l2	Q7TNC4 "Putative RNA-binding protein Luc7-like 2 (CGI-74 homolog)"	0.4712	34	6	0.3743	22	4	0.6963	55	5	0.75141	0.376471	2.13253	0.707262	0.0584767	1.44703	0.666281	0.000895619	1.13564	0.988454	0.972191	2.259	1.08303	0.122159	1.12609	0.887022	0.185331	1.23157	1.1383	0.761386	3.02223	0.977174	0.938911	2.4176	0.776383	0.465076	2.38932	0.962234	0.909361	2.28573	0.816322	0.190151	1.46631	0.821921	0.150354	1.35867	0.934157
ENSMUSP00000048337	ENSMUSG00000041057	Wdr43	Q6ZQL4 "WD repeat-containing protein 43 "	0.3176	38	10	0.2836	40	8	0.5022	53	10	1.14634	0.314978	1.33685	0.952203	0.841254	1.77364	1.04001	0.427757	1.11278	0.99292	0.961945	1.38764	1.0067	0.892577	1.12292	0.869061	0.0183359	1.11676	1.01981	0.88861	1.36073	1.01557	0.864547	1.22929	1.26373	0.140661	1.38783	1.1391	0.401331	1.3972	0.989183	0.955783	1.56461	1.17502	0.0549292	1.17997	1.22716
ENSMUSP00000099422	ENSMUSG00000037935	Smarce1	O54941 "SWI/SNF-related matrix-associated actin-dependent regulator chromatin subfamily E member 1 (BRG1-associated factor 57)(BAF57)"	0.3309	25	10	0.3187	20	9	0.5182	37	5	0.990463	0.914372	1.21655	1.02531	0.849114	1.3409	1.26807	0.155346	1.4581	0.878089	0.2645	1.28035	1.00303	0.952982	1.12141	1.26383	0.188255	1.50715	0.898108	0.342049	1.27424	0.996582	0.953158	1.13915	1.34922	0.0785349	1.42455	0.900883	0.362042	1.27877	0.922764	0.507746	1.30651	1.136	0.389694	1.44374	0.965002
ENSMUSP00000025137	ENSMUSG00000024287	Thoc1	Q8R3N6 "THO complex subunit 1 (Tho1)(Nuclear matrix protein p84)"	0.2801	43	10	0.1903	16	8	0.2801	32	3	1.11992	0.0780954	1.13757	0.9153	0.212462	1.16483	0.876524	0.102415	1.21768	1.06503	0.332021	1.14914	0.918849	0.00254316	1.04467	0.975499	0.371947	1.09803	1.05141	0.396676	1.1359	0.855976	0.000813134	1.06784	0.833474	0.477754	2.472	0.999814	0.997873	1.16756	0.854106	0.00059222	1.06512	0.872643	0.365579	1.65705	1.05033
ENSMUSP00000101571	ENSMUSG00000028896	Rcc1	Q8VE37 "Regulator of chromosome condensation (Chromosome condensation protein 1)"	0.4133	32	7	0.3207	23	6	0.5819	35	6	0.97859	0.527465	1.08218	0.966609	0.745037	1.2892	1.08091	0.151202	1.1254	1.06635	0.44357	1.21975	1.08757	0.0976473	1.11196	1.06995	0.242974	1.14037	0.995011	0.933679	1.15834	0.978049	0.685085	1.14191	1.17724	0.119216	1.25033	1.0574	0.199996	1.1021	1.01594	0.88536	1.30742	1.09909	0.271908	1.21749	1.21574
ENSMUSP00000023759	ENSMUSG00000023018	Smarcd1	Q61466 "SWI/SNF-related matrix-associated actin-dependent regulator of chromatin subfamily D member 1 (SWI/SNF complex 60 kDa subunit)(60 kDa BRG-1/Brm-associated factor subunit A)(BRG1-associated factor 60A)(BAF60A)(Protein D15KZ1)"	0.3942	36	6	0.1767	14	5	0.4447	33	4	0.893292	0.357316	1.33142	0.774657	0.170575	1.52938	0.896213	0.102585	1.16177	1.16064	0.350076	1.45023	1.02668	0.804672	1.31865	0.976351	0.4304	1.08739	1.04689	0.719924	1.36406	0.973555	0.859945	1.48513	0.967724	0.693254	1.27156	1.06306	0.653568	1.39052	0.947475	0.600406	1.30174	1.0543	0.429704	1.20298	1.08117
ENSMUSP00000025170	ENSMUSG00000024312	Wdr46	Q9Z0H1 "WD repeat-containing protein 46 (WD repeat-containing protein BING4)"	0.4019	33	13	0.2042	12	6	0.5418	45	6	1.11906	0.0881989	1.1415	1.12195	0.364209	1.34515	1.0868	0.00056356	1.02791	0.985476	0.77639	1.11697	1.1578	0.317924	1.40453	0.809133	0.024094	1.18573	1.10115	0.390934	1.26803	1.11041	0.240833	1.22432	0.91838	0.702049	1.7163	1.06453	0.415163	1.1765	1.12087	0.29506	1.28522	0.971365	0.808838	1.34025	1.19002
ENSMUSP00000001818	ENSMUSG00000001767	Crnkl1	P63154 "Crooked neck-like protein 1 (Crooked neck homolog)"	0.3493	47	11	0.1986	20	9	0.4159	54	4	1.08138	0.216548	1.14127	0.902762	0.670635	1.70654	1.18776	0.169995	1.35594	1.10599	0.120511	1.14139	0.986595	0.924823	1.37656	0.957012	0.433705	1.16774	1.27978	0.00418758	1.16069	0.973304	0.877353	1.47936	1.20215	0.114538	1.30418	1.10588	0.168294	1.16296	0.866523	0.491482	1.58132	1.04607	0.746608	1.49876	1.17453
ENSMUSP00000038580	ENSMUSG00000041506	Rrp9	Q91WM3 "U3 small nucleolar RNA-interacting protein 2 (U3 small nucleolar ribonucleoprotein-associated 55 kDa protein)(U3 snoRNP-associated 55 kDa protein)(U3-55K)(RRP9 homolog)"	0.3558	33	10	0.2463	17	8	0.3747	35	7	1.10302	0.429437	1.30744	0.952239	0.753785	1.42587	0.942667	0.197574	1.10487	0.999747	0.998031	1.25394	1.0247	0.479031	1.08024	0.815734	0.0044145	1.11902	1.08135	0.617687	1.4081	1.05313	0.449079	1.16499	1.00253	0.99445	2.34728	1.16715	0.233714	1.31506	0.978761	0.815003	1.2324	1.12798	0.449786	1.43993	1.25504
ENSMUSP00000082691	ENSMUSG00000016181	AA408296	Q8BTT6 "Digestive organ expansion factor homolog "	0.2734	42	13	0.1133	14	7				0.915234	0.240918	1.16934	0.906993	0.424892	1.32192				0.774571	0.00651854	1.18464	1.02152	0.27128	1.04394				0.825882	0.0645215	1.22729	0.920665	0.670985	1.57323				0.956465	0.487753	1.14509	0.918062	0.414442	1.26954				0.92083
ENSMUSP00000110378	ENSMUSG00000031134	Rbmx	A2AFI4;Q8C2U6;Q9R0Y0;Q9WV02 "RNA binding motif protein, X chromosome Fragment ";"Putative uncharacterized protein Fragment ";"Heterogeneous nuclear ribonucleoprotein GPutative uncharacterized proteinRNA binding motif protein, X chromosome, isoform CRA_c ;;";"Heterogeneous nuclear ribonucleoprotein GPutative uncharacterized proteinRNA binding motif protein, X chromosomeRNA binding motif protein, X…	0.4742	38	13							0.962681	0.846507	1.52039							1.14037	0.623334	1.7644							1.37321	0.338519	2.00023							1.15913	0.653678	2.01246							1.33977
ENSMUSP00000030030	ENSMUSG00000028345	Tex10	Q3URQ0 "Testis-expressed sequence 10 protein "	0.2694	65	10	0.1088	21	8	0.292	51	6	0.850979	0.447132	1.58281	0.776921	0.0101376	1.18659	1.01681	0.396935	1.04737	0.951135	0.78828	1.50621	1.05101	0.118495	1.06839	0.903016	0.0211377	1.08235	1.01931	0.929083	1.60416	1.02675	0.542355	1.10242	1.49512	0.18032	1.94326	0.97102	0.879578	1.53232	0.921871	0.149103	1.12604	1.20688	0.0982954	1.26912	0.865224
ENSMUSP00000099658	ENSMUSG00000057236	Rbbp4	Q60972 "Histone-binding protein RBBP4 (Retinoblastoma-binding protein 4)(RBBP-4)(Retinoblastoma-binding protein p48)(Chromatin assembly factor 1 subunit C)(CAF-1 subunit C)(Chromatin assembly factor I p48 subunit)(CAF-I 48 kDa subunit)(CAF-I p48)(Nucleosome /.../eling factor subunit RBAP48)"	0.3059	36	3	0.36	20	2	0.5529	40	4	0.660771	0.577457	14.9428	1.10409	0.760813	24.2787	1.08212	0.0714765	1.09607	0.573388	0.452031	13.2421	1.08952	0.77687	19.6823	0.93753	0.174212	1.12268	0.653004	0.553133	13.409	1.0361	0.848921	6.44263	0.826287	0.727539	4.88956	0.512026	0.351637	10.9307	0.972956	0.93155	25.2132	0.815548	0.336043	1.7642	0.646035
ENSMUSP00000117246	ENSMUSG00000024742	Fen1	Q3TGH6;Q8C5X6;Q8C952;Q8R069;Q91Z50;Q99M86 "Putative uncharacterized protein ";"Putative uncharacterized protein ";"Putative uncharacterized protein ";"Fen1 protein ";"Putative uncharacterized proteinFlap endonuclease 1Flap structure specific endonuclease 1Flap structure specific endonuclease 1, isoform CRA_c ;;;";"Flap endonuclease-1 "	0.4316	38	11	0.3974	29	8	0.7737	55	11	0.716611	0.00491156	1.22959	0.696741	5.73093e-05	1.10448	0.693465	4.95076e-10	1.03574	0.886278	0.106909	1.16398	0.915397	0.00176388	1.04364	0.927723	0.270395	1.15404	0.897421	0.158169	1.17127	0.832379	0.0136395	1.14181	0.865996	0.32687	1.36471	0.773466	0.0460141	1.28574	0.74922	2.47751e-05	1.07232	0.741258	4.81558e-05	1.10328	0.889949
ENSMUSP00000057771	ENSMUSG00000022391	Rangap1	P46061 "Ran GTPase-activating protein 1 (RanGAP1)"	0.3939	52	7	0.472	39	17	0.6333	61	11	1.14323	0.0783895	1.16874	0.992091	0.904582	1.14824	0.906651	0.000291998	1.04109	0.961399	0.664705	1.24599	1.07241	0.00387442	1.04492	1.00974	0.738427	1.06492	1.01697	0.828168	1.20821	1.04686	0.521278	1.15955	0.983693	0.939471	1.60072	0.879937	0.249105	1.28688	0.932646	0.224387	1.12408	0.978797	0.752709	1.15885	1.00258
ENSMUSP00000075655	ENSMUSG00000061136	Prpf40a	Q9R1C7 "Pre-mRNA-processing factor 40 homolog A (Formin-binding protein 3)(Formin-binding protein 11)(FBP-11)"	0.2004	39	10	0.2225	33	13	0.2812	43	5	0.96974	0.907687	1.79103	1.09652	0.646002	1.53141	0.961741	0.042225	1.03747	0.86335	0.52502	1.65308	0.99399	0.826224	1.06028	0.93335	0.0486399	1.07069	1.10433	0.656979	1.63046	1.06096	0.334163	1.13671	0.873259	0.742004	2.90427	0.915714	0.72821	1.75789	1.02497	0.894273	1.48564	0.803479	0.0404787	1.22554	1.09236
ENSMUSP00000004646	ENSMUSG00000004530	Coro1c	Q9WUM4 "Coronin-1C (Coronin-3)"	0.2679	24	8	0.1582	10	4	0.2911	28	4	1.23563	0.182844	1.40281	1.62952	0.0302686	1.49207	0.873485	0.066348	1.16444	0.947897	0.766931	1.50782	0.905583	0.0719623	1.12256	0.95835	0.47328	1.17997	0.839863	0.296785	1.44215	0.947372	0.666643	1.43544	0.74205	0.278939	2.05434	0.899211	0.177787	1.1826	1.16434	0.14686	1.28249	0.931995	0.530227	1.37261	1.12202
ENSMUSP00000023189	ENSMUSG00000022536	Glyr1	Q922P9 "Putative oxidoreductase GLYR1 (EC 1.-.-.-)(Glyoxylate reductase 1 homolog)(Nuclear protein NP60)"	0.2373	28	10	0.2699	20	9	0.3116	35	7	0.899474	0.513306	1.42213	0.914728	0.482026	1.32151	0.905634	0.00930803	1.06648	1.05879	0.690679	1.37607	1.07315	0.0485332	1.07253	0.923854	0.0580639	1.08646	0.941847	0.769526	1.56639	0.904188	0.138841	1.15176	0.749482	0.527875	2.8675	1.15076	0.369289	1.39946	1.09089	0.434026	1.27581	0.956219	0.807604	1.53793	1.14394
ENSMUSP00000036881	ENSMUSG00000038762	Abcf1	Q6P542 "ATP-binding cassette sub-family F member 1 "	0.2843	40	9	0.1792	21	7	0.4241	48	6	0.847794	0.0174667	1.13605	0.958465	0.518965	1.16365	0.983618	0.558191	1.07008	0.923565	0.257598	1.16233	0.99783	0.95844	1.10282	1.00277	0.789905	1.02559	0.870065	0.175536	1.24106	0.851094	7.7353e-05	1.04239	1.00585	0.964756	1.38148	0.872097	0.101787	1.18759	0.824001	0.0077855	1.12838	1.00391	0.94449	1.14688	0.901577
ENSMUSP00000076521	ENSMUSG00000025823	Pdia4	P08003 "Protein disulfide-isomerase A4 Precursor (EC 5.3.4.1)(Endoplasmic reticulum resident protein 72)(ER protein 72)(ERp-72)(ERp72)"	0.3292	42	9	0.1435	17	3	0.1466	19	3	0.922669	0.580306	1.38001	1.0648	0.446466	1.333	1.0743	0.315412	1.26136	1.22723	0.0667239	1.24935	1.30341	0.0807871	1.41252	1.13142	0.0543766	1.13794	1.08066	0.577422	1.36074	1.04523	0.681991	1.49381	0.917016	0.78382	3.28859	0.876011	0.268646	1.29279	0.870151	0.0346473	1.1212	0.836906	0.0875089	1.27491	1.35018
ENSMUSP00000049355	ENSMUSG00000036427	Gpi1	P06745 "Glucose-6-phosphate isomerase (GPI)(EC 5.3.1.9)(Phosphoglucose isomerase)(PGI)(Phosphohexose isomerase)(PHI)(Autocrine motility factor)(AMF)(Neuroleukin)(NLK)"	0.353	40	9	0.1846	17	8	0.4086	38	6	1.25966	0.125609	1.36516	1.33964	0.0163935	1.24642	0.954615	0.316679	1.11335	0.991266	0.944668	1.32644	0.821494	0.00150475	1.09676	1.07108	0.22837	1.13731	1.04142	0.721975	1.28906	0.983838	0.771435	1.1361	0.968527	0.73756	1.26118	1.1594	0.293492	1.3544	1.20294	0.0535348	1.20743	0.972932	0.69394	1.18432	0.986265
ENSMUSP00000115402	ENSMUSG00000028790	Khdrbs1	NP_035447.3 "KH domain containing, RNA binding, signal transduction associated 1 "	0.3476	39	10	0.4176	41	11	0.6682	57	9	1.18816	0.595097	2.05111	1.28375	0.237934	1.55793	1.05866	0.373129	1.14952	1.01943	0.958972	2.30753	1.12193	0.110675	1.15774	1.0126	0.845398	1.15415	1.07925	0.847409	2.42247	1.08442	0.109197	1.10815	0.693802	0.714638	9.25358	1.06232	0.873183	2.33	1.21364	0.266613	1.4429	0.626574	0.0137197	1.40899	1.18802
ENSMUSP00000044647	ENSMUSG00000026288	Inpp5d	Q9ES52 "Phosphatidylinositol-3,4,5-trisphosphate 5-phosphatase 1 (EC 3.1.3.n1)(SH2 domain-containing inositol-5'-phosphatase 1)(SH2 domain-containing inositol phosphatase 1)(SHIP-1)(Inositol polyphosphate-5-phosphatase of 145 kDa)(SIP-145)(p150Ship)"	0.22	61	10	0.1175	21	9	0.2149	53	2	0.392253	2.25552e-05	1.30374	0.371789	0.0018586	1.64995	0.307973	0.0486677	3.14627	0.759368	0.0130536	1.22372	0.852818	0.0252384	1.14308	0.911039	0.42513	2.54375	0.751617	0.0751754	1.37868	0.823218	0.0196416	1.16678	0.734595	0.0674159	1.51674	0.791756	0.0287265	1.22523	0.770528	0.0365396	1.27096	0.817642	0.0723983	1.33934	0.589655
ENSMUSP00000087682	ENSMUSG00000042323	Pbrm1	Q8R134 "Pb1 protein Fragment "	0.2207	98	13	0.1585	42	12	0.3011	95	11	0.714508	0.00597947	1.2459	0.836725	0.00068446	1.08768	0.898244	0.00607386	1.07144	0.857936	0.287865	1.35015	1.05758	0.0410767	1.05472	1.07687	0.124239	1.10332	0.697145	0.0157508	1.32281	0.900176	0.000352302	1.04657	0.869831	0.455541	1.49219	0.832849	0.168483	1.31252	0.962179	0.294277	1.0801	0.874695	0.0722661	1.16004	0.828785
ENSMUSP00000066181	ENSMUSG00000052337	Immt	Q8CAQ8 "Mitochondrial inner membrane protein (Mitofilin)"	0.2503	42	11	0.2832	29	12	0.3249	39	5	1.09666	0.192502	1.15847	1.24164	0.0041023	1.14109	0.554441	0.00573808	1.3551	1.17232	0.0402128	1.16223	1.16692	0.00158334	1.08505	1.14111	0.0349726	1.12394	0.858301	0.00307214	1.09006	1.1422	0.21903	1.25169	0.880795	0.328407	1.37277	1.24742	0.0336825	1.22169	1.1133	0.0227962	1.09343	1.01691	0.338828	1.04383	1.25832
ENSMUSP00000032078	ENSMUSG00000030007	Cct7	P80313 "T-complex protein 1 subunit eta (TCP-1-eta)(CCT-eta)"	0.3952	45	13	0.4449	31	14	0.6581	56	17	0.951985	0.726986	1.34984	0.974344	0.664175	1.1347	1.24538	3.19724e-05	1.08482	1.11428	0.50706	1.41168	0.848908	0.0166497	1.13749	1.06501	0.251914	1.11889	1.00756	0.953807	1.3196	0.908243	0.297214	1.21098	1.16161	0.108416	1.20536	1.30258	0.101677	1.38399	1.22512	0.000339367	1.09542	1.27638	0.0012154	1.14099	1.11602
ENSMUSP00000027252	ENSMUSG00000026083	Eif5b	Q05D44 "Eukaryotic translation initiation factor 5B (eIF-5B)(Translation initiation factor IF-2)"	0.2516	67	9	0.1571	27	9	0.3314	67	11	1.25772	0.239876	1.51658	1.40757	0.00263474	1.20149	1.31753	2.89492e-05	1.08896	0.785509	0.171852	1.44919	0.805225	0.00180069	1.11523	0.945794	0.367542	1.14062	0.836427	0.281044	1.42805	0.951677	0.294523	1.10719	1.11984	0.390622	1.32448	0.857249	0.44404	1.55454	0.940972	0.463793	1.20005	0.989244	0.872343	1.15737	0.778641
ENSMUSP00000071166	ENSMUSG00000062358	AC155934.2	AC155934.2 AC155934.2-201 "null" "Clone_based_ensembl_transcript"	0.4812	29	9	0.5075	24	10	0.7068	36	8	1.0212	0.851503	1.28429	1.26047	0.0944309	1.32332	1.08247	0.00188215	1.0395	0.888284	0.367039	1.33074	1.07549	0.00969945	1.05165	0.904828	0.000250237	1.03533	1.00339	0.987028	1.59166	1.23139	0.210609	1.41804	1.17243	0.39334	1.51237	0.953691	0.737167	1.36975	1.22851	0.0739437	1.25896	1.45446	0.00346082	1.22738	1.03308
ENSMUSP00000031478	ENSMUSG00000029504	Ddx51	Q6P9R1 "ATP-dependent RNA helicase DDX51 (EC 3.6.1.-)(DEAD box protein 51)"	0.3349	42	9	0.2582	21	10	0.349	33	3	1.07751	0.440344	1.2362	0.952873	0.514258	1.17449	0.981015	0.644204	1.16555	1.03656	0.706242	1.23611	1.05869	0.294111	1.12277	0.891033	0.00783504	1.0452	1.07763	0.487711	1.26747	1.02056	0.444472	1.05925	0.8402	0.569763	3.03913	1.09413	0.42989	1.28341	0.944155	0.38522	1.15307	0.860337	0.23993	1.47895	1.09819
ENSMUSP00000107033	ENSMUSG00000029478	Ncor2	Q3TG88;Q3TZ10;Q80ZV7 "Putative uncharacterized protein Fragment ";"Putative uncharacterized protein ";"Ncor2 protein Fragment "	0.2134	100	10	0.09514	41	4				1.0046	0.950787	1.17786	1.02463	0.860468	1.49882				0.918986	0.35176	1.21484	0.938194	0.0129021	1.03882				0.871234	0.320419	1.34517	1.04275	0.402229	1.14669				1.07564	0.411363	1.21104	1.05362	0.666606	1.41791				0.972356
ENSMUSP00000074953	ENSMUSG00000042625	Safb2	Q80YR5 "Scaffold attachment factor B2 (SAF-B2)"	0.3169	53	10				0.5721	101	9	0.963981	0.701129	1.23293				0.975587	0.498143	1.08364	1.04035	0.696159	1.24839				0.991028	0.81633	1.09044	1.11887	0.484106	1.41647				1.2058	0.0021419	1.10186	1.13119	0.27152	1.26876				1.05506	0.137133	1.07768	1.01211
ENSMUSP00000065836	ENSMUSG00000052533	Phyhd1	Q6ZQH8 "Nucleoporin NUP188 homolog "	0.2035	91	8	0.137	29	11	0.3059	83	10	0.953748	0.708864	1.33367	0.973444	0.710758	1.17017	0.976275	0.599584	1.10497	0.950892	0.727946	1.38939	0.946818	0.030053	1.04937	0.937958	0.161821	1.09973	0.98684	0.931437	1.42093	1.01057	0.738563	1.07066	0.933708	0.634288	1.37047	0.980403	0.886398	1.37154	0.97489	0.396632	1.06607	0.963414	0.68155	1.22001	0.992127
ENSMUSP00000105474	ENSMUSG00000021266	Wars	P32921 "Tryptophanyl-tRNA synthetase, cytoplasmic (EC 6.1.1.2)(Tryptophan--tRNA ligase)(TrpRS) [Contains T1-TrpRS;T2-TrpRS]"	0.2869	28	8	0.3074	21	5	0.4283	28	3	1.23496	0.0226106	1.18699	1.33989	0.121439	1.51319	1.11878	0.0437032	1.11006	1.59724	0.00255659	1.27383	1.13968	0.0347909	1.12246	1.45826	0.000969821	1.05189	1.06655	0.395203	1.18323	0.995853	0.956055	1.21741	0.420778	0.0885916	3.28448	1.28206	0.0143785	1.19928	1.44864	0.0611685	1.48944	0.834087	0.387121	2.03741	1.46167
ENSMUSP00000046388	ENSMUSG00000039804	Ncoa5	Q91W39 "Nuclear receptor coactivator 5 (NCoA-5)(Coactivator independent of AF-2)(CIA)"	0.4111	36	12	0.2763	24	10	0.6097	53	6	0.925188	0.512935	1.28805	0.902522	0.286284	1.22712	1.00581	0.902249	1.12224	0.974636	0.843822	1.32357	1.09345	0.300808	1.20211	0.999488	0.985312	1.07046	1.09677	0.592719	1.44634	1.14133	0.117768	1.18874	1.32916	0.068731	1.3722	0.954074	0.723095	1.32929	0.919143	0.255984	1.17025	0.989511	0.861382	1.15892	0.972074
ENSMUSP00000058308	ENSMUSG00000024095	Hnrpll	Q921F4 "Heterogeneous nuclear ribonucleoprotein L-like "	0.3232	26	10	0.3486	27	8	0.2758	30	5	0.940267	0.440997	1.18868	0.799346	0.013765	1.17611	0.978765	0.378281	1.06204	0.997584	0.976649	1.19946	1.09145	0.175028	1.147	1.01338	0.850358	1.20127	0.931111	0.464444	1.23533	1.00325	0.971252	1.2283	1.18588	0.242267	1.41227	1.04279	0.55871	1.16892	1.01565	0.818539	1.16666	1.09494	0.343006	1.264	0.984802
ENSMUSP00000026125	ENSMUSG00000025134	Thoc4	O08583 "THO complex subunit 4 (Tho4)(Ally of AML-1 and LEF-1)(Transcriptional coactivator Aly/REF)(RNA and export factor-binding protein 1)(REF1-I)"	0.6078	34	6	0.6627	37	7	0.7765	57	10	0.825031	0.456976	1.91384	0.804404	0.445092	1.91901	0.832966	0.00473534	1.11738	0.8795	0.496037	1.61047	0.914253	0.165282	1.14898	0.942978	0.149363	1.08789	0.882094	0.103189	1.18786	0.821955	0.67171	2.93705	0.704743	0.381509	2.36372	0.920151	0.57288	1.45749	0.769895	0.193157	1.54753	0.64184	0.162187	1.93236	0.837784
ENSMUSP00000103489	ENSMUSG00000060279	Ap2a1	P17426 "AP-2 complex subunit alpha-1 (Adapter-related protein complex 2 alpha-1 subunit)(Adaptor protein complex AP-2 subunit alpha-1)(Alpha1-adaptin)(Plasma membrane adaptor HA2/AP2 adaptin alpha A subunit)(Alpha-adaptin A)(Clathrin assembly protein comple /.../pha-A large chain)(100 kDa coated vesicle protein A)"	0.2419	50	6	0.1173	21	5				1.0675	0.532269	1.28464	1.27919	0.250543	1.66382				0.907174	0.00765476	1.05986	1.15439	0.0633169	1.16918				1.21796	0.0643476	1.23906	1.36127	0.0376034	1.32267				1.02364	0.750018	1.19537	0.920364	0.54739	1.4204				0.961927
ENSMUSP00000017692	ENSMUSG00000017548	Suz12	Q80U70 "Polycomb protein Suz12 (Suppressor of zeste 12 protein homolog)"	0.2942	46	9	0.1741	19	4	0.4089	42	4	1.1011	0.724835	1.83869	0.970029	0.889298	1.89593	1.09097	0.0893612	1.11825	1.12825	0.634193	1.75528	0.925157	0.333005	1.23984	0.934927	0.233238	1.15464	1.0997	0.75284	1.95889	0.953835	0.258167	1.1141	1.28177	0.537176	3.11724	1.14056	0.635705	1.85148	1.06153	0.688969	1.53838	1.04782	0.60905	1.29842	1.14214
ENSMUSP00000048377	ENSMUSG00000041438	Cirh1a	Q8R2N2 "Cirhin (Testis-expressed gene 292 protein)"	0.3134	53	8	0.2143	23	6	0.3324	41	5	1.06337	0.420978	1.18532	0.836436	0.0998894	1.25581	0.992157	0.651268	1.04584	1.01266	0.909404	1.28686	1.0128	0.699718	1.08332	0.814174	0.0035646	1.09738	1.07159	0.498024	1.25714	1.00784	0.880617	1.13538	0.806166	0.524651	2.36119	1.10726	0.279969	1.22851	0.88953	0.0940314	1.15704	0.902419	0.468038	1.42742	1.15527
ENSMUSP00000013759	ENSMUSG00000008200	Fnbp4	Q6ZQ03 "Formin-binding protein 4 (Formin-binding protein 30)"	0.1987	48	11	0.1458	22	5	0.247	39	2	0.748507	0.11848	1.45924	0.815259	0.080677	1.27615	0.761204	0.110673	1.83831	0.87325	0.380916	1.39019	0.957098	0.388999	1.13438	0.893461	0.293395	2.03543	0.913599	0.619821	1.48184	1.08312	0.404723	1.26894	1.20724	0.127228	1.62372	0.884603	0.462135	1.42942	0.875292	0.252149	1.31854	0.977541	0.195437	1.09581	0.853647
ENSMUSP00000004072	ENSMUSG00000003970	Rpl8	P62918 "60S ribosomal protein L8 "	0.5292	26	9	0.323	11	7	0.5214	31	8	1.55019	0.0563201	1.5736	1.4673	0.0763447	1.55086	1.02718	0.143174	1.03922	1.35556	0.184229	1.62048	1.13835	0.0155906	1.09955	1.03405	0.22356	1.06109	1.76077	0.0310936	1.64825	1.39461	0.000522155	1.12847	1.28626	0.593933	2.90398	1.54	0.109644	1.73904	1.20343	0.340305	1.5489	1.36056	0.297138	1.90881	1.55356
ENSMUSP00000019323	ENSMUSG00000019179	Mdh2	P08249 "Malate dehydrogenase, mitochondrial Precursor (EC 1.1.1.37)"	0.568	30	9	0.6834	31	13	0.7367	38	12	1.07642	0.204167	1.13068	1.20892	0.0785497	1.24029	1.02904	0.0374	1.02699	1.1813	0.127156	1.25325	0.800478	0.0330297	1.22267	1.01178	0.751554	1.08262	0.775128	0.00842803	1.18438	0.831619	0.00403906	1.11869	1.01211	0.970195	2.00008	1.22203	0.0132969	1.15731	1.24715	0.021452	1.19897	0.921565	0.56325	1.3521	0.975048
ENSMUSP00000117947	ENSMUSG00000030512	Snrpa1	NP_067311.4 "U2 small nuclear ribonucleoprotein A' "	0.5137	27	9	0.5882	27	12	0.8118	36	9	1.08962	0.697156	1.63317	0.98694	0.930654	1.384	1.03923	0.0160523	1.02961	1.03678	0.848979	1.52724	1.00132	0.966931	1.07078	0.971237	0.520503	1.10533	1.23099	0.431605	1.78371	1.07533	0.0892788	1.08956	1.38733	0.375427	2.23529	1.12289	0.618677	1.67576	1.0054	0.966286	1.31529	1.21929	0.103879	1.28299	1.12168
ENSMUSP00000020522	ENSMUSG00000020277	Pfkl	P12382 "6-phosphofructokinase, liver type (EC 2.7.1.11)(Phosphofructokinase 1)(Phosphohexokinase)(Phosphofructo-1-kinase isozyme B)(PFK-B)"	0.2756	34	6	0.2256	18	5	0.2821	46	2	1.08852	0.462146	1.31519	1.33853	0.00799015	1.17924	0.87643	0.154894	1.51588	1.05277	0.566131	1.24031	0.954497	0.0112467	1.02948	1.06858	0.526741	2.50131	0.855019	0.0136282	1.11414	1.00884	0.869595	1.14988	1.18245	0.458593	6.48135	0.922293	0.187119	1.14583	1.2937	0.00386046	1.12632	1.29244	0.164252	2.36353	0.862963
ENSMUSP00000049025	ENSMUSG00000071172	Sfrs3	P84104 "Splicing factor, arginine/serine-rich 3 (Pre-mRNA-splicing factor SRP20)(Protein X16)"	0.7134	37	5	0.6585	33	5	0.8902	35	4	1.06377	0.656043	1.42934	1.00907	0.982079	2.85479	0.967151	0.592641	1.19491	1.10297	0.371741	1.31087	1.01388	0.71935	1.1043	1.0943	0.477164	1.4247	1.27178	0.204568	1.55393	0.966209	0.603803	1.18488	0.926276	0.611372	1.53889	1.15919	0.179915	1.28747	0.963443	0.881536	1.91766	1.03729	0.910846	2.6051	1.15568
ENSMUSP00000021443	ENSMUSG00000021048	Mthfd1	Q922D8 "C-1-tetrahydrofolate synthase, cytoplasmic (C1-THF synthase) [Includes Methylenetetrahydrofolate dehydrogenase(EC 1.5.1.5);Methenyltetrahydrofolate cyclohydrolase(EC 3.5.4.9);Formyltetrahydrofolate synthetase(EC 6.3.4.3)]"	0.2866	56	9	0.1882	23	7	0.3241	37	6	1.09999	0.259765	1.19864	1.04808	0.599797	1.23062	0.979203	0.645257	1.11673	1.22673	0.0472294	1.22283	0.961897	0.497529	1.14075	1.14926	0.00582523	1.08081	1.0307	0.851385	1.43386	1.13608	0.00758052	1.08235	0.704988	0.389143	2.59461	1.16898	0.0384312	1.15661	1.3372	0.00286915	1.15811	1.04814	0.808002	1.6029	1.34865
ENSMUSP00000121309	ENSMUSG00000024949	Sf1	Q3UI45;Q3UK67 "Putative uncharacterized protein ";"Putative uncharacterized protein "	0.3066	40	1	0.3084	30	8	0.4562	49	7	1.23632			0.770349	0.129639	1.43237	0.826036	0.0074867	1.12549	0.919498			1.01822	0.885559	1.33128	1.03781	0.709119	1.26123	1.25271			0.981762	0.804658	1.18467	1.06462	0.835023	2.02286	1.0608			0.864645	0.141372	1.23061	1.00613	0.971155	1.48688	1.08447
ENSMUSP00000100985	ENSMUSG00000035478	Mbd3	003 "methyl-CpG binding domain protein 3 Gene [Source:MGI (curated);Acc:MGI:1333812]" "MGI_curated_transcript"	0.4484	22	2							1.05771	0.629169	2.95094							1.27488	0.171963	2.34991							1.06956	0.43708	2.01423							1.11314	0.102618	1.24788							1.27676
ENSMUSP00000042265	ENSMUSG00000035666	Gtf3c4	Q8BMQ2 "General transcription factor 3C polypeptide 4 (EC 2.3.1.48)(Transcription factor IIIC subunit delta)(TF3C-delta)(Transcription factor IIIC 90 kDa subunit)(TFIIIC 90 kDa subunit)(TFIIIC90)"	0.306	57	10	0.0918	12	2	0.3317	33	4	0.975	0.296628	1.05305	1.20909	0.0921981	1.4217	1.04856	0.390479	1.16265	0.884594	0.0115691	1.09178	1.03981	0.115593	1.09535	0.871142	0.00799247	1.07187	0.907643	0.225262	1.18336	1.08352	0.013558	1.02195	0.865492	0.784319	4.64745	0.861641	0.0268174	1.13597	1.05499	0.0720392	1.08036	0.741621	0.25366	1.96436	0.9343
ENSMUSP00000024967	ENSMUSG00000024151	Msh2	P43247 "DNA mismatch repair protein Msh2 (MutS protein homolog 2)"	0.3102	65	7	0.2513	31	10	0.3743	71	10	0.947898	0.387776	1.15101	0.912407	0.201318	1.16231	1.08649	0.000481209	1.0359	0.848545	0.0485917	1.17685	0.836827	0.000842906	1.08564	0.963502	0.248392	1.07052	0.767397	0.00074617	1.09746	0.768443	3.08673e-05	1.08075	0.982127	0.88333	1.31025	0.944987	0.406957	1.16801	1.0039	0.908584	1.07745	1.06302	0.347369	1.14962	0.78305
ENSMUSP00000084461	ENSMUSG00000039220	Ppp1r10	Q80W00 "Serine/threonine-protein phosphatase 1 regulatory subunit 10 (MHC class I region proline-rich protein CAT53)"	0.2939	57	9	0.286	38	7	0.3941	62	6	1.03065	0.840543	1.3978	1.0208	0.815289	1.22924	0.992478	0.833757	1.09177	1.0271	0.831286	1.32323	0.966503	0.283794	1.07341	0.962616	0.414318	1.11637	1.16646	0.275419	1.35432	1.04619	0.316918	1.10654	1.09361	0.509627	1.38292	1.0357	0.78517	1.33235	1.00446	0.955909	1.20782	0.999616	0.995633	1.18755	1.15272
ENSMUSP00000098075	ENSMUSG00000022557	Bop1	Q3TIJ5 "Putative uncharacterized protein "	0.3183	42	9	0.1899	23	9	0.3497	47	3	1.02651	0.57847	1.11208	1.11827	0.226867	1.21764	1.0243	0.837019	1.55608	0.920888	0.301969	1.19117	1.01107	0.792337	1.09779	0.883913	0.0235359	1.08647	1.06196	0.497514	1.21986	1.06355	0.680206	1.39409	1.14197	0.597754	2.50773	1.13665	0.0996082	1.17311	1.28582	0.0172605	1.21374	1.02476	0.873311	1.7907	1.19924
ENSMUSP00000097996	ENSMUSG00000002107	Cugbp2	Q9Z0H4 "CUG-BP- and ETR-3-like factor 2 (CELF-2)(Bruno-like protein 3)(RNA-binding protein BRUNOL-3)(CUG triplet repeat RNA-binding protein 2)(CUG-BP2)(ELAV-type RNA-binding protein 3)(ETR-3)(mETR-3)(Neuroblastoma apoptosis-related RNA-binding protein)(mNapor)"	0.2947	40	5	0.3179	20	4	0.3289	30	4	0.866727	0.549275	1.83652	0.485994	0.0184627	1.63378	0.613371	0.00296915	1.19042	0.96215	0.86925	1.84135	0.68484	0.0778071	1.57883	0.718529	0.00368749	1.13542	1.17418	0.433434	1.6693	0.667383	0.0260429	1.36739	0.730689	0.448183	3.14941	1.01697	0.926979	1.61414	0.539608	0.0405829	1.76302	0.786875	0.42599	2.29366	0.991649
ENSMUSP00000066806	ENSMUSG00000033658	Ddx19b	Q8BZY3 "Putative uncharacterized protein "	0.3975	33	7	0.3096	18	6	0.4453	37	4	1.01624	0.860474	1.23964	1.03982	0.153747	1.06157	0.899354	0.0777146	1.13644	1.10326	0.35809	1.27332	0.901707	0.020564	1.08291	1.01498	0.758842	1.15105	1.02047	0.716065	1.13887	0.994827	0.883896	1.09066	0.771578	0.566609	3.61629	1.16804	0.116194	1.23016	1.15258	0.0741783	1.17608	0.956234	0.793207	1.64413	1.13154
ENSMUSP00000029694	ENSMUSG00000028059	Arhgef2	Q60875 "Rho guanine nucleotide exchange factor 2 (Guanine nucleotide exchange factor H1)(GEF-H1)(Lymphoid blast crisis-like 1)(LBC'S first cousin)(Oncogene LFC)(Rhobin)"	0.2812	63	11							0.886539	0.0409799	1.12122							0.862574	0.0150572	1.119							1.14343	0.0920209	1.17383							0.877978	0.0647567	1.15021							0.863943
ENSMUSP00000105529	ENSMUSG00000034274	Thoc5	Q5SVF8 "THO complex 5 Fragment "	0.2691	41	9	0.2173	20	13	0.3045	30	6	1.01469	0.836937	1.17129	0.96827	0.578428	1.1309	0.904368	0.0572759	1.1108	0.887216	0.0422891	1.12114	0.992789	0.847779	1.08372	0.939874	0.241275	1.12746	0.80706	0.0270013	1.20077	0.87547	0.00188861	1.0759	0.883729	0.492792	1.53677	0.929701	0.166883	1.11689	0.927384	0.232037	1.13939	0.962415	0.625757	1.20888	0.929413
ENSMUSP00000026425	ENSMUSG00000025364	Pa2g4	P50580 "Proliferation-associated protein 2G4 (Proliferation-associated protein 1)(Protein p38-2G4)(Mpp1)(IRES-specific cellular trans-acting factor 45 kDa)(ITAF45)"	0.3858	27	7	0.4492	28	10	0.7335	50	8	1.17973	0.129996	1.25937	1.25622	3.88098e-05	1.07169	1.15807	0.000255555	1.05245	1.0658	0.469465	1.22388	1.03801	0.0754283	1.04289	1.07908	0.018055	1.06037	0.953205	0.885349	2.18048	0.948696	0.666493	1.30659	1.06896	0.703435	1.48825	1.07645	0.378617	1.20885	1.18748	0.000306732	1.07099	1.29178	0.0331403	1.25714	1.2196
ENSMUSP00000071955	ENSMUSG00000061024	Rrs1	Q9CYH6 "Ribosome biogenesis regulatory protein homolog "	0.4466	34	10	0.3562	23	9	0.4658	37	5	0.981842	0.860367	1.25733	1.0678	0.550285	1.27457	1.21642	0.00687833	1.11203	0.92917	0.483588	1.25538	1.04323	0.122914	1.05823	0.8492	0.00645727	1.09094	1.08464	0.352	1.20592	1.06259	0.185844	1.10157	1.47128	0.0919617	1.62539	1.09351	0.420234	1.27052	1.13228	0.213538	1.23613	1.28683	0.0142481	1.1837	1.19666
ENSMUSP00000022849	ENSMUSG00000022241	Tars	Q9D0R2 "Threonyl-tRNA synthetase, cytoplasmic (EC 6.1.1.3)(Threonine--tRNA ligase)(ThrRS)"	0.3116	47	9	0.2368	22	9	0.4571	57	11	0.481319	0.00667867	1.59112	0.390437	2.4942e-05	1.28524	0.667958	5.05226e-06	1.10754	0.942604	0.657184	1.34417	0.857992	1.63672e-06	1.02882	0.985224	0.484411	1.04673	0.557352	0.00468548	1.41562	0.528051	2.73488e-09	1.05369	0.697751	0.035084	1.38979	0.601925	0.00529881	1.36168	0.524146	3.24317e-05	1.19566	0.796186	0.00649355	1.15983	0.671664
ENSMUSP00000096784	ENSMUSG00000059751	AC156571.1	AC156571.1 AC156571.1-201 "null" "Clone_based_ensembl_transcript"	0.5492	30	9	0.5909	30	13	0.8182	58	13	1.15023	0.272413	1.315	1.23101	0.0618486	1.24597	1.06436	0.0584318	1.06714	0.95793	0.762049	1.37208	1.01777	0.579828	1.06977	1.07968	0.0845657	1.09292	1.10184	0.564051	1.45019	1.12651	0.0510328	1.12723	1.24509	0.549667	2.17265	1.03766	0.806257	1.3997	1.17438	0.106871	1.22256	1.52156	0.0177543	1.39535	1.08498
ENSMUSP00000007131	ENSMUSG00000020917	Acly	Q91V92 "ATP-citrate synthase (EC 2.3.3.8)(ATP-citrate (pro-S-)-lyase)(Citrate cleavage enzyme)"	0.2961	70	12	0.2016	30	10	0.3706	68	14	0.831861	3.19854e-05	1.06196	1.23819	0.00436379	1.13647	0.921532	0.0395059	1.08019	0.989715	0.778351	1.08208	0.680543	0.0115304	1.31706	0.947307	0.0431248	1.05356	0.699997	4.20444e-05	1.12758	0.717838	0.00493503	1.2248	0.93139	0.597349	1.32783	0.788741	0.00263729	1.14241	1.1767	0.0328951	1.15742	0.873671	0.0412999	1.1375	0.670745
ENSMUSP00000010241	ENSMUSG00000010097	Nxf1	Q99JX7 "Nuclear RNA export factor 1 (Tip-associating protein)(Tip-associated protein)(mRNA export factor TAP)"	0.3625	48	12	0.3236	28	12	0.4968	49	6	0.846184	0.164399	1.27987	0.741465	0.0390103	1.32455	0.71834	0.000235182	1.09518	0.992076	0.951362	1.32394	0.995249	0.889619	1.07658	0.91699	0.00130225	1.03497	1.02031	0.92942	1.62941	0.935997	0.107666	1.08667	0.852742	0.379631	1.52982	0.930441	0.60026	1.34193	0.84578	0.188315	1.30061	0.954769	0.519814	1.18767	0.915605
ENSMUSP00000123438	ENSMUSG00000055553	Gm4802	A5JUZ1;B0LAC2 "Ubiqutin subunit 1 Fragment ";"Ubiquitin A-52 residue ribosomal protein fusion product 1 Fragment "	0.6795	52	7				0.5431	62	8	1.04227	0.844512	1.64				1.18576	0.00464218	1.10359	0.841852	0.506392	1.81536				0.981007	0.7894	1.17753	0.846568	0.424965	1.61005				1.34604	0.675399	4.99732	0.918916	0.741589	1.82046				1.05728	0.914012	3.24408	0.971224
ENSMUSP00000023116	ENSMUSG00000022477	Aco2	Q99KI0 "Aconitate hydratase, mitochondrial Precursor (Aconitase)(EC 4.2.1.3)(Citrate hydro-lyase)"	0.2769	39	7	0.2397	18	8	0.3141	49	7	0.994731	0.97514	1.48881	0.867812	0.346951	1.39459	0.925702	0.00501604	1.04476	1.17485	0.427808	1.59004	0.802635	0.00757861	1.15055	1.03928	0.428382	1.11744	0.953653	0.817732	1.61971	0.843043	0.0338829	1.16591	0.990523	0.964621	1.65523	1.00861	0.965739	1.59769	0.904778	0.483961	1.37747	0.887955	0.471459	1.46007	1.03597
ENSMUSP00000101559	ENSMUSG00000054405	Dnajc8	A2ALF0 "DnaJ (Hsp40) homolog, subfamily C, member 8 "	0.4566	27	9	0.4545	22	9	0.498	19	6	1.16457	0.514433	1.67376	1.08748	0.598772	1.42338	1.06451	0.00149213	1.02588	1.02657	0.917921	1.76561	0.975028	0.27017	1.05046	0.999607	0.993028	1.11629	1.04432	0.851507	1.67725	0.940527	0.355635	1.15515	1.15149	0.761121	3.09375	1.07033	0.788779	1.76076	0.98808	0.934132	1.383	1.01534	0.951761	1.85052	1.12516
ENSMUSP00000109552	ENSMUSG00000031865	Dctn1	O08788 "Dynactin subunit 1 (150 kDa dynein-associated polypeptide)(DAP-150)(DP-150)(p150-glued)"	0.2832	74	8	0.09524	23	2	0.3013	70	1	0.894209	0.0860576	1.14162	0.9029	0.508083	3.78564	1.07361			0.973889	0.631644	1.13299	0.899331	0.468616	3.39189	0.923896			0.949186	0.411165	1.15158	0.975938	0.822084	2.93996	1.04208			1.01185	0.810274	1.1182	0.923622	0.596897	3.95645	1.0807			1.00315
ENSMUSP00000018437	ENSMUSG00000018293	Pfn1	P62962 "Profilin-1 (Profilin I)"	0.7071	20	8	0.6214	11	5	0.7929	24	7	1.68931	0.000344659	1.19301	1.31363	0.014402	1.20083	1.41457	0.00129607	1.16149	1.10112	0.251312	1.20406	0.781348	0.00186272	1.09823	1.10196	0.0972778	1.12866	1.34471	0.0517548	1.34891	0.998795	0.973275	1.09848	1.87006	0.120176	2.33028	1.11982	0.390131	1.34855	1.02371	0.505905	1.09321	1.2433	0.151217	1.38275	1.05616
ENSMUSP00000034947	ENSMUSG00000032383	Ppib	P24369 "Peptidyl-prolyl cis-trans isomerase B Precursor (PPIase B)(EC 5.2.1.8)(Rotamase B)(Cyclophilin B)(S-cyclophilin)(SCYLP)(CYP-S1)"	0.5694	34	7	0.6574	24	9	0.6759	32	8	1.13929	0.795004	3.23713	1.53606	0.239227	2.17791	1.23299	6.99836e-06	1.04276	0.720394	0.574898	3.87107	0.992743	0.843011	1.08556	1.03855	0.17987	1.06188	0.850031	0.793892	4.28688	1.10175	0.297833	1.22222	0.875316	0.545461	1.64179	0.827517	0.748701	3.9791	1.09984	0.743679	1.91216	1.02118	0.83481	1.25734	1.12071
ENSMUSP00000072195	ENSMUSG00000037012	Hk1	201 "hexokinase 1 Gene [Source:MGI (curated);Acc:MGI:96103]" "MGI_automatic_transcript"	0.2815	62	11	0.3932	54	20	0.3206	60	2	1.81981	1.60299e-05	1.17659	1.70597	3.7609e-07	1.15911	0.798639	0.00738327	1.03369	1.1628	0.00109167	1.07499	1.40244	1.75444e-08	1.07934	1.2706	0.0957407	1.58584	1.73859	0.000222438	1.23515	1.73865	1.79563e-08	1.1332	2.01053	0.380346	418.938	1.48372	0.000125271	1.14964	1.16899	0.00349592	1.10302	1.64041	0.397843	93.3707	1.37175
ENSMUSP00000035105	ENSMUSG00000032518	Rpsa	P14206 "40S ribosomal protein SA (Laminin receptor 1)(LamR)(37/67 kDa laminin receptor)(LRP/LR)(Laminin-binding protein precursor p40)(LBP/p40)(37 kDa laminin receptor precursor)(37LRP)(67 kDa laminin receptor)(67LR)(37 kDa oncofetal antigen)(OFA/iLRP)"	0.4305	29	5	0.3932	15	6	0.6508	39	6	1.25264	0.0919697	1.3276	1.30051	0.0429138	1.28459	1.04197	0.604312	1.2108	1.12037	0.33771	1.33638	1.14896	0.164363	1.24513	1.11975	0.148831	1.18591	1.33846	0.35993	2.18876	1.32525	0.00669361	1.17662	0.833374	0.494233	1.88864	1.25088	0.0217009	1.1854	1.17416	0.0927816	1.22022	1.19561	0.19698	1.3617	1.15363
ENSMUSP00000022842	ENSMUSG00000022234	Cct5	P80316 "T-complex protein 1 subunit epsilon (TCP-1-epsilon)(CCT-epsilon)"	0.342	43	10	0.2957	20	8	0.6562	54	8	0.899095	0.314502	1.2534	0.966693	0.62806	1.17136	1.21754	0.00088312	1.08791	1.06246	0.509371	1.22076	0.805406	1.86114e-06	1.0362	1.09621	0.104023	1.12335	0.89359	0.316896	1.27145	0.923781	0.111267	1.1084	1.20595	0.352863	1.56065	1.15585	0.238042	1.29593	1.25902	0.0122656	1.17662	1.29642	0.0805398	1.35088	0.956793
ENSMUSP00000000137	ENSMUSG00000020152	Actr2	P61161 "Actin-related protein 2 (Actin-like protein 2)"	0.4645	33	9	0.5228	27	6	0.632	42	8	1.12918	0.0398179	1.12105	1.18047	0.0709255	1.20505	0.896765	0.00575556	1.06796	0.917787	0.266286	1.18003	0.674078	0.0307945	1.40531	0.871834	0.0107614	1.09873	0.707952	9.10223e-05	1.11669	0.986778	0.887391	1.25821	0.87729	0.435977	1.45468	1.08667	0.0637926	1.09325	1.09449	0.0804156	1.11199	0.990469	0.839983	1.11414	0.870922
ENSMUSP00000030117	ENSMUSG00000028409	Smu1	Q3UKJ7 "WD40 repeat-containing protein SMU1 (Smu-1 suppressor of mec-8 and unc-52 protein homolog)"	0.3509	41	10	0.3372	30	8	0.4581	41	7	0.98091	0.759289	1.148	1.03741	0.77877	1.34652	1.14125	0.0114904	1.09421	0.989213	0.883814	1.17725	1.1214	0.0215437	1.09636	1.04115	0.323338	1.09606	0.79022	0.15811	1.41338	0.756398	0.0316744	1.27972	1.20454	0.188864	1.35972	0.984584	0.860281	1.21412	0.920835	0.293352	1.18732	1.12512	0.338385	1.31965	1.03136
ENSMUSP00000116108	ENSMUSG00000068039	Tcp1	A8XUV6;Q62289;Q62290;Q62291;Q6LBL9;Q9QZ33;Q9QZ34;Q9QZ35;Q9QZ36 "T-complex protein 1 subunit alpha ";"T-complex polypeptide 1 Fragment ";"T-complex polypeptide 1 Fragment ";"T-complex polypeptide 1 Fragment ";"T-complex polypeptide 1 Fragment ";"T-complex polypeptide 1 Fragment ";"T-complex polypeptide 1 Fragment ";"T-complex polypeptide 1 Fragment ";"T-complex polypeptide 1 Fragment "	0.3759	42	8	0.4137	26	14	0.5468	54	11	0.916985	0.571159	1.41201	0.917668	0.320153	1.19667	1.20764	0.0954632	1.25652	1.02735	0.884341	1.52663	0.845762	0.000120313	1.06925	1.02857	0.633965	1.13634	0.724974	0.186597	1.68127	0.861971	0.0818443	1.18545	0.824628	0.688649	2.83312	1.16196	0.367214	1.44528	1.17023	0.0427961	1.16328	0.944389	0.837136	1.82981	1.00004
ENSMUSP00000075573	ENSMUSG00000041360	D19Bwg1357e	Q8BKS9 "Pumilio domain-containing protein KIAA0020 "	0.2932	44	9	0.2191	20	9	0.5401	55	12	0.927503	0.601482	1.37604	0.895941	0.166332	1.18105	0.957486	0.286207	1.08905	0.926194	0.446189	1.24694	0.98869	0.520052	1.03976	0.749666	0.000806363	1.14894	1.10279	0.527894	1.40768	1.05118	0.12794	1.07013	0.932998	0.733229	1.54745	1.06333	0.63995	1.33821	1.01729	0.773252	1.14179	0.988793	0.927768	1.30661	1.18354
ENSMUSP00000080888	ENSMUSG00000078517	C230096C10Rik	Q8C7X2 "Uncharacterized protein KIAA0090 Precursor "	0.2347	37	8	0.05433	9	4	0.2887	41	7	1.02038	0.687899	1.12065	1.02852	0.893632	1.85048	1.06893	0.00654615	1.04085	0.990526	0.87967	1.15417	0.974505	0.461317	1.10244	0.965928	0.000649714	1.01321	1.06119	0.623375	1.31455	1.14684	0.154857	1.25914	0.854216	0.694899	2.55146	1.03213	0.697166	1.20253	1.10371	0.502297	1.51122	1.05105	0.605547	1.25064	1.0936
ENSMUSP00000001834	ENSMUSG00000001783	D10Wsu52e	Q99LF4 "UPF0027 protein C22orf28 homolog "	0.2614	29	10	0.3168	24	13	0.3782	33	9	0.93789	0.743398	1.53668	0.954384	0.408605	1.12616	0.858765	0.000768972	1.06909	0.944811	0.784823	1.57849	1.00523	0.906741	1.0997	1.07259	0.0189016	1.05664	0.913494	0.668153	1.58706	1.0551	0.251101	1.10177	1.10461	0.125748	1.14365	1.01347	0.951109	1.61631	1.12637	0.0290089	1.11026	1.10814	0.0843867	1.12774	0.869105
ENSMUSP00000022577	ENSMUSG00000022000	Zc3h13	B9EHN9;Q8BHW0;Q8CIK5;Q9CXN5 "Zinc finger CCCH type containing 13 ";"Putative uncharacterized protein Fragment ";"Zc3h13 protein Fragment ";"Putative uncharacterized protein "	0.2406	80	7	0.1122	34	5	0.3748	113	5	1.12098	0.406879	1.36804	0.965782	0.813518	1.46766	0.991525	0.841859	1.11741	1.07427	0.473441	1.25764	1.02325	0.478461	1.08512	1	1	1.12431	1.14193	0.321202	1.35044	1.00693	0.905946	1.1645	1.10821	0.418865	1.37274	1.11306	0.430918	1.36408	1.03317	0.543985	1.14659	1.0697	0.613671	1.40796	1.20697
ENSMUSP00000097561	ENSMUSG00000051747	Ttn	A2ASS6 "Titin (EC 2.7.11.1)(Connectin)"	0.1592	1031	1							1.07027									3.21931									1.05045									0.503708									0.656438
ENSMUSP00000033597	ENSMUSG00000031245	Hmgn5	Q9JL35 "High mobility group nucleosome-binding domain-containing protein 5 (Nucleosome-binding protein 1)(Nucleosome-binding protein 45)(NBP-45)(Protein GARP45)"	0.2315	19	9	0.3153	20	10	0.6773	45	8	0.572373	0.0863623	1.93139	0.687092	0.349631	2.36423	0.816769	1.12575e-05	1.04441	0.709491	0.34216	2.1897	1.07728	0.217814	1.13551	1.01034	0.833783	1.11817	0.550229	0.144184	2.34226	0.826512	0.0113396	1.14557	0.940236	0.957713	14.185	0.652321	0.258332	2.24699	0.792564	0.519544	2.1916	1.12592	0.833336	3.61188	0.634152
ENSMUSP00000094239	ENSMUSG00000064127	Med14	A2ABV5 "Mediator of RNA polymerase II transcription subunit 14 (Mediator complex subunit 14)(Cofactor required for Sp1 transcriptional activation subunit 2)(CRSP complex subunit 2)(Thyroid hormone receptor-associated protein complex 170 kDa component)(Trap170)"	0.2008	58	9	0.09253	23	3	0.3043	77	8	0.8815	0.29099	1.29339	0.989274	0.958831	2.21744	0.909381	0.0166989	1.07451	0.913307	0.297257	1.20631	1.10621	0.165784	1.22508	1.0159	0.650273	1.08197	0.962577	0.709112	1.25544	1.08862	0.546593	1.66176	0.991391	0.937021	1.28362	0.950637	0.591931	1.23257	1.04237	0.637948	1.38415	1.13778	0.0162287	1.10188	0.963132
ENSMUSP00000066492	ENSMUSG00000001855	Nup214	Q80U93 "Nuclear pore complex protein Nup214 (Nucleoporin Nup214)(214 kDa nucleoporin)"	0.117	56	6	0.1357	44	11	0.2374	70	13	1.05854	0.729168	1.49089	1.04095	0.554613	1.15752	0.899639	0.00207149	1.06071	0.993937	0.968065	1.44999	1.21025	0.281657	1.45296	0.944188	0.321092	1.12853	1.00144	0.994139	1.61495	1.02131	0.72571	1.13907	0.883707	0.44931	1.4112	0.920978	0.69606	1.66739	0.905604	0.187817	1.16914	0.830884	0.0206312	1.16361	0.963104
ENSMUSP00000120911	ENSMUSG00000040688	Tbl3	Q8C4J7 "Transducin beta-like protein 3 "	0.2772	47	8	0.2459	27	10	0.407	48	9	1.03951	0.467698	1.12678	0.978934	0.526119	1.07577	1.04046	0.0296484	1.03523	0.886729	0.0229641	1.10298	1.00399	0.842726	1.04504	0.776991	6.22158e-07	1.04213	0.907836	0.153634	1.15364	0.972935	0.252354	1.05205	0.946306	0.656384	1.31715	0.951085	0.370855	1.13207	0.96992	0.598621	1.13499	0.98627	0.830306	1.15486	1.05928
ENSMUSP00000036924	ENSMUSG00000033712	2610301G19Rik	Q8VDP4 "Protein KIAA1967 homolog "	0.2245	42	7	0.1768	22	9				0.795597	0.0717401	1.29212	0.79271	7.81795e-06	1.05441				0.992477	0.926532	1.2119	1.27079	0.000402298	1.09985				0.996089	0.965035	1.23345	0.973394	0.0430387	1.02623				1.01439	0.901092	1.30943	0.999517	0.991573	1.10778				0.951449
ENSMUSP00000052872	ENSMUSG00000025153	Fasn	P19096 "Fatty acid synthase (EC 2.3.1.85) [Includes [Acyl-carrier-protein] S-acetyltransferase(EC 2.3.1.38);[Acyl-carrier-protein] S-malonyltransferase(EC 2.3.1.39);3-oxoacyl-[acyl-carrier-protein] synthase(EC 2.3.1.41);3-oxoacyl-[acyl-carrier-protein] redu /.../EC 1.1.1.100);3-hydroxypalmitoyl-[acyl-carrier-protein] dehydratase(EC 4.2.1.61);Enoyl-[acyl-carrier-protein] reductase(EC 1.3.1.10);Ole…	0.1585	93	8	0.07748	28	6	0.2216	99	6	0.878601	0.115694	1.1859	1.13329	0.186453	1.23391	1.09402	0.0266384	1.07719	0.983069	0.823149	1.19012	0.908366	0.220092	1.19286	1.08202	0.0497892	1.08192	0.816666	0.0974435	1.28465	0.894798	0.228915	1.2319	0.88257	0.403481	1.42199	0.793457	0.0173803	1.1932	1.03285	0.680439	1.2095	1.0868	0.0541674	1.08919	0.776597
ENSMUSP00000109707	ENSMUSG00000056737	Capg	P24452 "Macrophage-capping protein (Actin regulatory protein CAP-G)(Myc basic motif homolog 1)(Actin-capping protein GCAP39)"	0.4886	31	9	0.4314	15	8	0.4771	19	8	0.716715	0.104839	1.52197	0.735413	0.00379243	1.1865	0.807952	0.0279999	1.2003	1.10532	0.717507	1.85155	0.919859	0.0340706	1.07811	1.39802	0.000205605	1.11928	0.98208	0.946834	1.83313	0.914528	0.0270716	1.0788	1.1896	0.403926	1.5877	0.710522	0.153275	1.6479	0.439406	6.26717e-06	1.17553	0.842744	0.00420932	1.102	0.867579
ENSMUSP00000109110	ENSMUSG00000026843	Fubp3	A2AJ72 "Far upstream element (FUSE) binding protein 3MCG130458 ;"	0.3304	44	8	0.2724	28	7	0.3989	47	3	0.965759	0.567917	1.14742	0.972059	0.666798	1.16561	0.884163	0.182934	1.30255	0.833349	0.025476	1.16468	0.854583	0.000940004	1.06585	0.822104	0.124776	1.39015	1.04702	0.164696	1.07254	1.04	0.131779	1.05657	1.16499	0.522644	2.35212	0.998019	0.942027	1.0642	0.968778	0.534923	1.12519	1.00356	0.978995	1.67338	0.836389
ENSMUSP00000007993	ENSMUSG00000029701	Rbm28	Q8CGC6 "RNA-binding protein 28 (RNA-binding motif protein 28)"	0.296	46	7	0.2067	20	7	0.3173	41	4	1.00885	0.962295	1.54881	0.958841	0.437992	1.13181	0.900981	0.00166997	1.03102	1.25354	0.305228	1.63783	1.21885	0.0238831	1.17493	1.01981	0.42158	1.06951	1.20147	0.262396	1.43786	1.08323	0.151811	1.12657	1.39993	0.030638	1.31917	1.28943	0.187511	1.51929	1.16208	0.00297445	1.07944	1.50812	0.013689	1.28474	1.42651
ENSMUSP00000026427	ENSMUSG00000025366	Esyt1	Q3U7R1 "Extended synaptotagmin-1 (E-Syt1)(Membrane-bound C2 domain-containing protein)"	0.2399	49	9	0.131	20	4	0.2619	56	2	1.37923	0.0114535	1.255	1.00142	0.983688	1.226	1.08064	0.583161	3.6091	1.11094	0.326866	1.26152	1.14815	0.0236444	1.10856	1.19828	0.561983	16.3782	1.85476	0.0680303	1.96524	1.10064	0.369741	1.3362	0.878641	0.528515	6.03853	1.06437	0.571875	1.28251	0.819044	0.0694938	1.25759	0.873115	0.418046	3.77673	1.4557
ENSMUSP00000083341	ENSMUSG00000042185	Nfrkb	Q6PIJ4 "Nuclear factor related to kappa-B-binding protein (DNA-binding protein R kappa-B)"	0.2269	64	5				0.1728	48	1	1.01513	0.727904	1.11817				0.969962			1.03383	0.579393	1.16569				0.955198			0.994891	0.954633	1.26474				0.765143			1.05096	0.416946	1.16484				0.806724			0.995617
ENSMUSP00000093968	ENSMUSG00000071652	Ints5	Q8CHT3 "Integrator complex subunit 5 (Int5)"	0.2505	50	7	0.2181	28	6	0.3202	55	8	1.02852	0.647176	1.15358	0.931555	0.597513	1.38204	1.06978	0.0288031	1.05989	0.985071	0.73052	1.10736	0.992944	0.808857	1.07399	0.987916	0.727137	1.08237	1.01496	0.903641	1.33347	0.704582	0.256952	2.02124	1.02949	0.924236	2.00817	0.994151	0.932308	1.17595	0.883378	0.0484515	1.13064	1.04383	0.604737	1.20588	0.999683
ENSMUSP00000087947	ENSMUSG00000022148	Fyb	O35601 "FYN-binding protein (FYN-T-binding protein)(FYB-120/130)(p120/p130)(SLP-76-associated phosphoprotein)(SLAP-130)(Adhesion and degranulation promoting adaptor protein)(ADAP)"	0.2186	35	8	0.216	21	11	0.3834	46	3	1.13639	0.0993222	1.17259	1.00756	0.880221	1.11473	1.42951	0.00804237	1.14881	0.916094	0.244104	1.17701	0.849048	2.34077e-06	1.03877	0.731361	0.0360314	1.30042	0.714111	6.39769e-05	1.09878	0.705752	1.34753e-07	1.06143	0.561497	0.389352	9.75056	0.725581	0.0107708	1.24639	0.632286	2.55699e-06	1.1136	0.567225	0.12713	2.62327	0.912168
ENSMUSP00000117461	ENSMUSG00000038900	Rpl12	Q3TIQ2;Q5BLK0;Q8C2K0 "Putative uncharacterized protein ";"Putative uncharacterized proteinRibosomal protein L12MCG18564, isoform CRA_aMCG20026 ;;;";"Putative uncharacterized protein "	0.6303	24	8	0.7333	18	8	0.8788	26	7	1.15488	0.414256	1.48057	1.26236	0.0247834	1.21351	1.10614	0.716803	1.91366	1.14288	0.312351	1.33658	1.05852	0.0364104	1.05349	0.952801	0.764335	1.45804	1.44959	0.0215526	1.34735	1.25528	0.000748041	1.09923	0.669384	0.543722	4.60193	1.33235	0.124473	1.47531	1.30201	0.00436449	1.16284	1.22597	0.405712	1.74646	1.47179
ENSMUSP00000064557	ENSMUSG00000056201	Cfl1	Q9CX22 "Putative uncharacterized protein "	0.7048	20	7	0.6211	32	14	0.9036	33	7	1.66843	0.0539992	1.68879	1.67786	0.0147175	1.48835	0.590712	7.2229e-05	1.14329	1.61913	0.0613012	1.67067	0.856768	5.93149e-05	1.059	0.857826	0.0180935	1.12352	2.18325	0.0150642	1.76324	1.28708	0.000679531	1.13096	0.776748	0.787061	8.92134	1.91453	0.0283998	1.73952	1.49714	0.0310344	1.43409	0.714155	0.475779	2.95427	1.88273
ENSMUSP00000113835	ENSMUSG00000022974	1810007M14Rik	P58501 "GC-rich sequence DNA-binding factor homolog "	0.2709	57	10	0.1077	16	4	0.2437	37	2	0.896537	0.188398	1.18956	0.793221	0.0758167	1.31821	1.00723	0.0850129	1.01237	0.976214	0.728601	1.16429	1.03557	0.0658485	1.03999	1.03059	0.312223	1.22685	0.980706	0.658465	1.10122	1.05763	0.278717	1.1447	0.854341	0.0700007	1.24711	0.94895	0.402514	1.14444	0.868879	0.123903	1.23457	0.957212	0.426663	1.55331	0.881301
ENSMUSP00000101858	ENSMUSG00000030795	Fus	P56959 "RNA-binding protein FUS (Protein pigpen)"	0.2741	26	4	0.3649	40	4	0.5039	51	3	1.14611	0.823486	5.95249	1.06005	0.897392	3.75676	0.938828	0.0860147	1.089	1.09678	0.893912	7.59357	1.07832	0.249021	1.18319	1.00655	0.841049	1.13121	1.10582	0.831128	3.96239	1.07625	0.688273	1.69685	0.379148	0.112456	4.6265	1.06404	0.889541	3.69812	1.07928	0.85735	3.45759	0.57441	0.177961	3.21723	1.07572
ENSMUSP00000115722	ENSMUSG00000074129	Flt3l	P19253 "60S ribosomal protein L13a (Transplantation antigen P198)(Tum-P198 antigen)"	0.5074	32	10	0.6355	17	9	0.7833	33	8	1.38851	0.0175416	1.29156	1.43393	0.0330785	1.38165	1.15978	0.011892	1.10957	1.17496	0.146551	1.25802	1.01612	0.331603	1.03632	1.00697	0.892901	1.12484	1.44444	0.00810808	1.27888	1.1798	0.30047	1.4112	0.929464	0.780554	1.81752	1.23403	0.0709535	1.26158	1.23259	0.0865526	1.28003	1.13746	0.476135	1.49878	1.29832
ENSMUSP00000075987	ENSMUSG00000061904	Slc25a3	Q8VEM8 "Phosphate carrier protein, mitochondrial Precursor (Phosphate transport protein)(PTP)(Solute carrier family 25 member 3)"	0.3894	35	9	0.3501	21	7	0.5854	34	5	1.4978	0.0608127	1.53303	1.36937	0.0837408	1.44973	0.916416	0.103797	1.12238	1.47646	0.0838255	1.57647	1.29399	0.0021023	1.1301	0.8916	0.00341158	1.05259	1.57752	0.0775907	1.68101	1.61516	0.00179782	1.24681	1.10405	0.710613	1.99276	1.58568	0.0659054	1.64767	1.71031	0.0121523	1.44846	1.26018	0.0520989	1.2644	1.67669
ENSMUSP00000037597	ENSMUSG00000040824	Snrpd2	P62317 "Small nuclear ribonucleoprotein Sm D2 (Sm-D2)(snRNP core protein D2)"	0.6949	26	5	0.6949	24	8	0.822	21	5	0.984361	0.929599	1.59247	0.89812	0.374832	1.30753	0.969014	0.46176	1.11344	0.893466	0.389959	1.38352	0.952561	0.0481529	1.04926	0.983134	0.611182	1.08954	1.02607	0.874363	1.52801	0.909085	0.146175	1.14788	1.14444	0.778806	3.47824	0.991203	0.888802	1.17902	0.888697	0.0415227	1.11854	1.00522	0.97653	1.58739	1.07713
ENSMUSP00000041814	ENSMUSG00000041168	Lonp1	Q8CGK3 "Lon protease homolog, mitochondrial Precursor (EC 3.4.21.-)(Lon protease-like protein)(LONP)(Mitochondrial ATP-dependent protease Lon)(Serine protease 15)"	0.25	48	9	0.2164	28	5	0.3403	49	4	1.19819	0.0413491	1.18737	1.2939	0.0385305	1.2656	1.12045	0.0508114	1.12128	1.08056	0.339587	1.19237	1.22027	0.00898837	1.12345	1.288	0.0107334	1.15189	1.04591	0.703549	1.30007	0.942831	0.158077	1.09887	1.20626	0.302635	1.61709	1.00485	0.962285	1.25697	0.887783	0.061244	1.13656	1.05177	0.204276	1.10442	1.01263
ENSMUSP00000105341	ENSMUSG00000021144	Mta1	201 "metastasis associated 1 Gene [Source:MGI (curated);Acc:MGI:2150037]" "MGI_automatic_transcript"	0.4322	62	5	0.358	46	9	0.593	77	9	1.29627	0.651817	8.37913	1.20733	0.01	1.13824	1.06321	0.217879	1.11147	1.3269	0.598547	4.63514	1.22003	0.000497902	1.08501	1.21646	0.118579	1.29497	1.14224	0.832545	6.27184	1.03904	0.32204	1.08728	0.82137	0.282698	1.48291	1.18764	0.689114	3.45934	1.14271	0.0587416	1.14988	0.991568	0.885143	1.13989	1.49829
ENSMUSP00000020991	ENSMUSG00000020661	Dnmt3a	O88508 "DNA (cytosine-5)-methyltransferase 3A (Dnmt3a)(EC 2.1.1.37)(DNA methyltransferase MmuIIIA)(DNA MTase MmuIIIA)(M.MmuIIIA)"	0.1696	29	9	0.1696	18	7	0.4196	50	6	0.797327	0.0986607	1.32253	0.828897	0.0262191	1.16955	0.772285	0.00379286	1.13934	0.960731	0.770608	1.35832	1.03491	0.690024	1.22205	0.948805	0.109616	1.072	1.09767	0.484053	1.34027	1.1611	0.00294134	1.07879	0.886719	0.37247	1.3712	0.92656	0.601998	1.38264	0.988651	0.869337	1.17667	0.872496	0.0191417	1.10847	1.06585
ENSMUSP00000084618	ENSMUSG00000039191	Rbpj	Q3U6F1 "Putative uncharacterized protein "	0.2763	31	7	0.3251	22	13	0.5247	44	7	1.43282	0.0151205	1.29883	1.27418	0.00146286	1.1373	1.19316	0.0063987	1.11132	0.864346	0.229167	1.30536	0.929565	0.00911149	1.0526	0.9142	0.00393888	1.04955	1.08825	0.551728	1.38862	1.15299	0.0135853	1.11332	1.81211	0.00133401	1.29439	1.28147	0.0759505	1.32755	1.21352	0.000251283	1.08577	1.27147	0.0464067	1.26478	1.18951
ENSMUSP00000069908	ENSMUSG00000031864	Ints10	Q3TE59;Q8BXH8 "Putative uncharacterized protein ";"Putative uncharacterized protein "	0.2785	44	8	0.1535	20	5	0.3587	53	5	0.91819	0.281502	1.18887	0.859807	0.190532	1.30518	1.08218	0.125588	1.1202	0.884587	0.0846753	1.15543	0.936122	0.257761	1.1491	0.986174	0.771791	1.13262	0.922672	0.241227	1.16029	0.935697	0.261429	1.15167	1.04221	0.806049	1.5489	0.865448	0.0765799	1.17899	0.845265	0.0145544	1.11978	1.05394	0.344325	1.14581	0.925909
ENSMUSP00000024816	ENSMUSG00000024019	Rnf8	Q9DBC3 "S-adenosyl-L-methionine-dependent methyltransferase FTSJD2 (EC 2.1.1.-)(FtsJ methyltransferase domain-containing protein 2)"	0.2999	63	7	0.2151	27	11	0.3059	53	4	1.23303	0.0422122	1.22052	1.10559	0.423062	1.30703	1.01217	0.763013	1.1237	1.17232	0.095042	1.21714	1.04485	0.358891	1.10699	1.03791	0.405328	1.13041	0.951655	0.652453	1.29171	0.949613	0.829886	1.6859	0.923207	0.63236	1.61448	1.18331	0.155908	1.28905	1.06825	0.490918	1.22841	1.00535	0.95112	1.29057	1.12431
ENSMUSP00000123412	ENSMUSG00000024048	2900073G15Rik	Q6ZWQ9;Q922W7;Q9CXD2;Q9D6E6 "Putative uncharacterized proteinMCG5400 ;";"2900073G15Rik protein Fragment ";"Putative uncharacterized protein ";"Putative uncharacterized protein "	0.6628	21	8	0.6686	24	5	0.8605	37	2	0.709429	0.0423006	1.38759	0.814999	0.197044	1.44393	0.934768	0.672844	4.56487	1.1728	0.354832	1.47563	0.602803	0.000670683	1.15845	0.96084	0.73553	3.16037	0.279007	0.000803268	1.65341	0.748464	0.0299396	1.27602	0.761284	0.284838	5.27533	0.913887	0.611556	1.49292	1.06616	0.543766	1.30781	0.839236	0.462525	7.23565	0.88502
ENSMUSP00000113157	ENSMUSG00000009575	Cbx5	Q61686 "Chromobox protein homolog 5 (Heterochromatin protein 1 homolog alpha)(HP1 alpha)"	0.4293	18	4	0.4712	15	5	0.6963	30	8	0.663607	0.0994704	1.73859	0.924994	0.864484	3.28603	0.835661	0.000491022	1.07208	0.631868	0.0665341	1.67753	1.02823	0.667902	1.18196	0.914782	0.0442697	1.08988	0.867603	0.646327	2.4333	1.01433	0.931691	1.54182	0.869504	0.714453	2.38173	0.795482	0.471098	2.42355	0.954884	0.900339	2.614	0.768618	0.241224	1.62598	0.802849
ENSMUSP00000071956	ENSMUSG00000063052	Lrrc40	Q9CRC8 "Leucine-rich repeat-containing protein 40 "	0.3704	42	8	0.2508	20	13	0.4485	38	10	0.892826	0.0390043	1.1116	0.943916	0.126451	1.07959	1.03772	0.289953	1.07733	0.826512	0.0178667	1.15766	0.719551	2.33507e-07	1.07138	0.883697	0.0293199	1.11413	0.72087	0.000146498	1.1099	0.714168	9.50419e-06	1.10574	0.965274	0.808451	1.37742	0.89451	0.105516	1.15246	1.03288	0.300898	1.06739	1.04738	0.530676	1.17421	0.6948
ENSMUSP00000076944	ENSMUSG00000063694	Cycs	P62897 "Cytochrome c, somatic "	0.5143	22	7	0.6857	22	5	0.7333	23	4	0.77107	0.528587	2.58934	1.08134	0.807384	2.30145	0.760609	0.000332636	1.04761	0.928573	0.876412	3.05701	1.15697	0.00987302	1.09154	1.1741	0.0665998	1.19834	1.09465	0.848163	3.0252	1.03418	0.717336	1.27135	0.56656	0.364403	5.44757	1.03308	0.945739	3.07221	1.13723	0.645794	2.05332	0.808693	0.661686	4.042	1.15048
ENSMUSP00000080949	ENSMUSG00000061607	Mdc1	Q5PSV9 "Mediator of DNA damage checkpoint protein 1 "	0.1774	45	6	0.09133	20	9	0.3232	78	6	1.31421	0.248425	1.71244	1.27167	0.029635	1.23341	1.52095	0.000177934	1.11485	1.00337	0.988226	1.74784	0.887668	0.00415903	1.07179	0.894703	0.0520499	1.11933	1.15164	0.539185	1.73507	0.925115	0.472985	1.26915	1.07008	0.509014	1.27766	1.0764	0.766966	1.83099	0.950977	0.501528	1.17904	0.916557	0.0658783	1.10019	1.15789
ENSMUSP00000023673	ENSMUSG00000022952	Runx1	Q03347 "Runt-related transcription factor 1 (Core-binding factor subunit alpha-2)(CBF-alpha-2)(Acute myeloid leukemia 1 protein)(Oncogene AML-1)(Polyomavirus enhancer-binding protein 2 alpha B subunit)(PEBP2-alpha B)(PEA2-alpha B)(SL3-3 enhancer factor 1 al /.../subunit)(SL3/AKV core-binding factor alpha B subunit)"	0.2667	17	9	0.2366	17	8	0.2946	23	5	0.756552	0.0395595	1.29944	0.767963	0.00273305	1.14815	0.763134	0.0120868	1.18793	0.894449	0.349173	1.29523	0.941544	0.140365	1.08946	0.944027	0.0606129	1.06365	0.74331	0.0295415	1.2953	0.722368	0.000121104	1.10576	0.924683	0.1971	1.15101	0.821395	0.132253	1.31088	0.792244	0.00829178	1.16338	0.757949	0.0047817	1.14541	0.938852
ENSMUSP00000107767	ENSMUSG00000027012	Dync1i2	A2BFF8 "Dynein cytoplasmic 1 intermediate chain 2 "	0.221	22	9	0.1818	14	6	0.2913	28	1	0.825283	0.0108028	1.14103	1.01959	0.854891	1.29566	0.891906			1.07868	0.265131	1.15939	1.10173	0.0267223	1.08355	1.06754			0.803685	0.0411844	1.23	1.01763	0.708247	1.12004	0.912183			0.925473	0.184505	1.13251	1.07488	0.347748	1.1963	0.644207			0.998497
ENSMUSP00000062753	ENSMUSG00000051495	Irf2bp2	Q8BJC6 "Putative uncharacterized protein Fragment "	0.2035	15	5	0.3333	18	7	0.4193	41	7	0.540098	0.0525663	1.87181	0.854368	0.0715206	1.19271	0.679642	0.000629953	1.15642	0.74999	0.248803	1.80808	0.986272	0.875741	1.23036	1.02897	0.236387	1.05455	0.720632	0.309498	2.18596	1.04327	0.210911	1.07683	0.840922	0.510493	1.83341	0.845524	0.610631	2.32699	0.962712	0.401866	1.10861	0.852002	0.287463	1.39909	0.800325
ENSMUSP00000111295	ENSMUSG00000031928	Mre11a	Q61216 "Double-strand break repair protein MRE11A (MmMRE11A)(Meiotic recombination 11 homolog A)(MRE11 homolog A)(Meiotic recombination 11 homolog 1)(MRE11 homolog 1)"	0.2195	35	10	0.2663	31	11	0.4391	58	9	1.19767	0.0728228	1.2225	0.943872	0.309781	1.12782	1.18681	0.300538	1.4288	0.962599	0.648224	1.20047	0.858322	0.000117433	1.0575	0.884391	0.000867145	1.05648	0.9961	0.952838	1.15643	0.920671	0.330859	1.19743	0.80965	0.227166	1.45096	1.13581	0.170604	1.21339	0.912623	0.0690969	1.10523	1.03924	0.577609	1.16522	1.13785
ENSMUSP00000110725	ENSMUSG00000025862	Stag2	A2AFF3;A2AFF6;B7ZCD2;Q3TG33;Q3UQG8 "Stromal antigen 2 Fragment ";"Stromal antigen 2 ";"Stromal antigen 2 Fragment ";"Putative uncharacterized protein Fragment ";"Putative uncharacterized proteinStromal antigen 2 Fragment ;"	0.2484	68	9	0.1806	36	11	0.489	81	12	0.737318	0.0114003	1.23995	0.787165	0.00197136	1.137	0.732466	2.14248e-05	1.10217	0.830837	0.0979087	1.25625	0.923249	0.00074944	1.03795	0.939218	0.132553	1.08868	0.762969	0.00784009	1.19388	0.835892	1.17952e-05	1.0512	0.910544	0.5037	1.34765	0.752129	0.00432315	1.18164	0.85353	0.035723	1.15659	0.883645	0.0688482	1.14457	0.830909
ENSMUSP00000015435	ENSMUSG00000015291	Gdi1	P50396 "Rab GDP dissociation inhibitor alpha (Rab GDI alpha)(Guanosine diphosphate dissociation inhibitor 1)(GDI-1)"	0.4202	37	8	0.2641	17	6	0.6202	46	14	1.23808	0.35408	1.66355	1.20241	0.670718	2.85839	0.903853	8.44694e-06	1.03138	1.12638	0.628994	1.74579	0.695225	0.000394297	1.11785	0.955115	0.0440264	1.04549	0.891858	0.647825	1.76354	0.795974	0.0402399	1.23766	0.93874	0.636174	1.32565	1.05569	0.846675	1.89422	1.05176	0.898687	2.63473	0.872631	0.033719	1.13201	1.00707
ENSMUSP00000005841	ENSMUSG00000005698	Ctcf	Q61164 "Transcriptional repressor CTCF (CCCTC-binding factor)(CTCFL paralog)(11-zinc finger protein)"	0.1766	26	7	0.2255	18	5	0.3886	44	5	0.910052	0.0538905	1.10123	1.04869	0.792323	1.59831	0.972256	0.708105	1.21433	0.986388	0.894173	1.27339	1.05756	0.21026	1.10982	0.975251	0.682473	1.17117	0.900196	0.794385	2.57082	0.759198	0.0840879	1.397	0.617984	0.404987	4.20612	1.04593	0.360228	1.11733	1.0718	0.729611	1.68059	0.948791	0.918116	3.79332	1.0507
ENSMUSP00000027797	ENSMUSG00000026516	Nvl	Q9DBY8 "Nuclear valosin-containing protein-like (Nuclear VCP-like protein)(NVLp)"	0.2386	42	8	0.1848	19	6	0.3719	49	6	1.08467	0.357194	1.21537	1.05934	0.712708	1.46258	1.14961	0.0361638	1.13443	0.922827	0.217589	1.15051	0.865741	0.0235383	1.12211	0.834763	0.00156963	1.0775	1.17169	0.0628939	1.18546	1.1111	0.191812	1.19669	0.929072	0.842563	2.47	1.28195	0.00432022	1.15224	1.13622	0.0488011	1.13512	1.08926	0.606298	1.49185	1.16293
ENSMUSP00000105628	ENSMUSG00000041645	Ddx24	Q9ESV0 "ATP-dependent RNA helicase DDX24 (EC 3.6.1.-)(DEAD box protein 24)"	0.2194	37	8	0.2124	25	6	0.3909	60	10	0.928986	0.338241	1.18471	1.04059	0.438423	1.12924	1.1341	0.0010517	1.06183	0.998729	0.984455	1.1607	1.15338	0.103593	1.20273	0.915981	0.0489455	1.09117	1.0672	0.704977	1.47686	1.18889	0.0348011	1.16735	1.0161	0.871637	1.24281	1.12889	0.0556014	1.13323	1.19408	0.00256425	1.08529	1.16903	0.00434792	1.09796	1.17696
ENSMUSP00000031443	ENSMUSG00000029480	Dhx37	Q5DTX1;Q6NZL1 "MKIAA1517 protein Fragment ";"DEAH (Asp-Glu-Ala-His) box polypeptide 37 "	0.2417	60	11	0.1522	31	9	0.2904	62	7	0.907044	0.456093	1.32361	0.828227	0.0494539	1.20671	0.966041	0.295097	1.0765	0.991651	0.952298	1.356	1.01822	0.259257	1.03489	0.864941	0.00949452	1.09927	0.925261	0.592899	1.36805	0.891145	0.0323562	1.10827	1.03084	0.800429	1.32485	0.894529	0.46523	1.3869	0.851649	0.0684815	1.19241	0.951546	0.402603	1.14451	0.930877
ENSMUSP00000029730	ENSMUSG00000028089	Chd1l	Q9CXF7 "Chromodomain-helicase-DNA-binding protein 1-like (EC 3.6.1.-)"	0.2944	51	8	0.09667	13	5	0.3178	58	2	1.01896	0.877468	1.33067	0.981197	0.787292	1.20039	1.21542	0.0231695	1.09445	1.22561	0.188692	1.39901	1.21284	0.0107784	1.12625	1.09809	0.345217	2.04696	1.12896	0.414637	1.40322	1.00819	0.789241	1.08244	1.13692	0.130416	1.40322	1.12448	0.45698	1.43502	1.09222	0.0697313	1.10469	1.1758	0.338056	3.34839	1.08409
ENSMUSP00000028147	ENSMUSG00000026806	Ddx31	Q3TLT4;Q6NZQ2 "Putative uncharacterized protein ";"DEAD/H (Asp-Glu-Ala-Asp/His) box polypeptide 31 "	0.2737	38	9	0.271	25	9	0.326	35	6	0.90733	0.087814	1.12228	0.98378	0.83782	1.19523	0.872825	0.00274999	1.06585	0.81418	0.0128596	1.16037	0.877449	0.0250174	1.11582	0.698792	0.0013494	1.15403	0.969401	0.864199	1.50044	0.895864	0.0713631	1.12981	0.580326	0.214513	2.67625	0.92912	0.507741	1.27701	1.00093	0.990827	1.19908	0.70468	0.112339	1.59631	0.912824
ENSMUSP00000101961	ENSMUSG00000059248	Sept9	Q80UG5 "Septin-9 (SL3-3 integration site 1 protein)"	0.3628	40	7							1.49842	0.000314207	1.14321							0.894736	0.0117399	1.07666							0.884789	0.0380487	1.11901							0.689711	4.08535e-05	1.07366							0.886734
ENSMUSP00000020640	ENSMUSG00000020372	Gnb2l1	P68040 "Guanine nucleotide-binding protein subunit beta-2-like 1 (Receptor of activated protein kinase C 1)(RACK1)(Receptor for activated C kinase)(p205)(12-3)"	0.4511	22	9	0.4132	21	7	0.5899	28	8	0.922201	0.471859	1.28064	1.27421	0.0507907	1.27568	1.04312	0.0393029	1.04027	0.752217	0.0141147	1.23378	1.02244	0.541088	1.08742	1.06582	0.0132781	1.04687	0.869078	0.171963	1.24073	1.16328	0.0597085	1.1732	1.26434	0.313232	1.66617	0.841429	0.0268462	1.15854	1.19049	0.0223219	1.1498	1.40316	0.0179766	1.29776	0.857293
ENSMUSP00000047797	ENSMUSG00000041781	Cpsf2	O35218 "Cleavage and polyadenylation specificity factor subunit 2 (Cleavage and polyadenylation specificity factor 100 kDa subunit)(CPSF 100 kDa subunit)"	0.1893	30	8	0.2148	27	8	0.3184	48	8	0.76779	0.00926023	1.19208	0.728476	0.0159157	1.26751	0.919332	0.0370425	1.08049	0.872287	0.0930845	1.18091	0.922696	0.492418	1.30048	0.975198	0.439609	1.07519	0.781022	0.0534369	1.28685	0.783149	0.0662727	1.30469	0.936742	0.687811	1.44614	0.811574	0.122187	1.32849	0.739578	0.00431298	1.18774	0.915519	0.144858	1.13567	0.754377
ENSMUSP00000075089	ENSMUSG00000058301	Upf1	Q9EPU0 "Regulator of nonsense transcripts 1 (EC 3.6.1.-)(ATP-dependent helicase RENT1)(Nonsense mRNA reducing factor 1)(NORF1)(Up-frameshift suppressor 1 homolog)(mUpf1)"	0.202	49	10	0.1174	19	4	0.2046	49	2	1.17791	0.466069	1.62683	1.007	0.927384	1.2515	0.857672	0.00295782	1.0091	1.45434	0.108403	1.60865	1.03984	0.381275	1.12911	1.03716	0.264134	1.22651	1.26604	0.262435	1.56255	1.07695	0.480456	1.34124	0.911605	0.385253	2.25562	1.22962	0.270714	1.48951	1.06511	0.304591	1.1764	1.13763	0.415311	3.49612	1.45986
ENSMUSP00000093969	ENSMUSG00000033237	1700124K17Rik	Q69ZG5;Q8BS84;Q8CET8;Q8R2U9 "MKIAA1557 protein Fragment ";"Putative uncharacterized protein ";"Putative uncharacterized protein ";"Arid2 protein "	0.1591	50	5	0.1105	29	6	0.1838	59	4	0.820994	0.533438	2.23536	0.808608	0.303836	1.6109	0.989767	0.829183	1.1493	0.82165	0.544552	2.28092	0.90144	0.0773293	1.12781	1.09322	0.204933	1.19209	1.02852	0.901081	1.80349	1.0377	0.457143	1.12538	1.03323	0.948461	4.40119	0.851969	0.498976	1.82011	0.832259	0.154609	1.32536	1.01965	0.941506	2.17472	0.999326
ENSMUSP00000023882	ENSMUSG00000023118	Sympk	Q80X82 "Symplekin "	0.2096	77	9	0.198	41	14	0.514	90	16	0.811987	0.183466	1.39075	0.784751	3.71227e-05	1.08945	0.936145	0.0115896	1.05014	0.810918	0.108131	1.30635	1.06385	0.159166	1.09365	0.97838	0.559176	1.08109	0.723494	0.0247541	1.31079	0.816191	0.0258032	1.1905	0.968263	0.717518	1.20492	0.730036	0.0491166	1.36767	0.743885	8.44847e-05	1.12061	0.936886	0.0528864	1.06834	0.803338
ENSMUSP00000111033	ENSMUSG00000031060	Rbm10	NP_001161247.1 "RNA-binding protein 10 isoform 2 "	0.2164	42	7							0.934033	0.544792	1.29724							1.03655	0.658091	1.20775							1.0208	0.775631	1.18408							1.05791	0.710862	1.42522							1.00136
ENSMUSP00000001042	ENSMUSG00000001016	Ilf2	Q9CXY6 "Interleukin enhancer-binding factor 2 (Nuclear factor of activated T-cells 45 kDa)"	0.3481	29	8	0.4718	28	10	0.6864	41	12	0.851974	0.00588498	1.10197	0.881879	0.179775	1.2159	0.976637	0.411646	1.06287	0.863343	0.0516943	1.15996	1.01133	0.844163	1.13424	1.04978	0.205934	1.0828	0.951569	0.494469	1.17693	1.02787	0.6845	1.15963	1.32376	0.0116476	1.22677	0.916755	0.313802	1.20855	1.02019	0.700458	1.12058	1.1782	0.00146206	1.08953	0.908481
ENSMUSP00000115223	ENSMUSG00000024236	Svil	Q3TTX5;Q7TMJ2;Q7TN21;Q99KQ8 "Putative uncharacterized protein Fragment ";"Svil protein Fragment ";"Svil protein Fragment ";"Svil protein Fragment "	0.1811	90	8	0.07788	29	3				1.1876	0.118166	1.25652	1.65497	0.0146664	1.30403				0.876053	0.09243	1.17427	0.881312	0.355941	1.57869				1.13037	0.287946	1.28663	1.48581	0.042435	1.4371				1.05012	0.705447	1.34137	1.0561	0.635312	1.52814				0.84809
ENSMUSP00000027146	ENSMUSG00000025997	Ikzf2	P81183 "Zinc finger protein Helios (Ikaros family zinc finger protein 2)"	0.2852	30	6	0.2757	28	6	0.3099	24	2	0.574742	0.0163367	1.49297	0.502175	0.0066181	1.48697	0.670612	0.140161	3.1148	0.742159	0.153784	1.57827	0.779177	0.173378	1.49815	0.929332	0.267722	1.51658	0.767114	0.602341	3.40937	0.697795	0.216725	1.92445	0.880723	0.627239	11.4014	0.827793	0.455053	1.82268	0.610806	0.0107399	1.37718	0.832223	0.146796	1.72949	0.940812
ENSMUSP00000109741	ENSMUSG00000067367	Lyar	Q08288 "Cell growth-regulating nucleolar protein "	0.3789	37	9	0.3351	21	8	0.5696	40	5	0.9114	0.172881	1.15368	0.937072	0.609255	1.33289	0.997196	0.908248	1.06557	1.02491	0.571852	1.10103	1.12358	0.0178971	1.0937	1.05736	0.0643022	1.06297	1.19031	0.0236086	1.15496	1.04941	0.314528	1.11102	0.97777	0.974726	6.36948	1.26869	8.95611e-05	1.07883	1.19828	0.0874332	1.2404	1.02881	0.92957	2.31168	1.41137
ENSMUSP00000034980	ENSMUSG00000032409	Atr	Q9JKK8 "Serine/threonine-protein kinase ATR (EC 2.7.11.1)(Ataxia telangiectasia and Rad3-related protein)"	0.1985	137	8	0.04326	22	1	0.2201	124	1	0.846438	0.202801	1.32396	0.457007			0.866669			0.730925	0.0270002	1.30463	0.68685			0.811089			0.670018	0.0282966	1.40637	0.676287			0.303597			0.818825	0.133274	1.32097	0.733835			0.818639			0.808033
ENSMUSP00000028599	ENSMUSG00000027176	Cstf3	Q99LI7 "Cleavage stimulation factor subunit 3 (Cleavage stimulation factor 77 kDa subunit)(CSTF 77 kDa subunit)(CstF-77)(CF-1 77 kDa subunit)"	0.3529	56	8	0.1953	22	6	0.5132	54	6	0.93536	0.0812043	1.08072	0.90801	0.212044	1.18942	1.01335	0.681531	1.08148	0.928387	0.166084	1.1204	0.978993	0.712368	1.1501	0.949055	0.213064	1.09882	0.820667	0.0322025	1.19166	0.96952	0.827133	1.41321	0.839507	0.673474	2.73428	0.890249	0.173397	1.1989	0.87619	0.101158	1.18459	0.858336	0.66708	2.36332	0.898477
ENSMUSP00000099649	ENSMUSG00000059796	Eif4a1	P60843 "Eukaryotic initiation factor 4A-I (eIF-4A-I)(eIF4A-I)(EC 3.6.1.-)(ATP-dependent RNA helicase eIF4A-1)"	0.4039	36	7	0.4433	34	10	0.6453	62	12	1.11966	0.350299	1.31405	1.30021	0.155097	1.46615	1.37464	0.00048322	1.15416	1.01401	0.926924	1.42764	0.881073	0.00629335	1.08422	1.04401	0.277929	1.0866	1.09371	0.606041	1.49615	1.19661	0.062813	1.21084	1.32974	0.35299	1.90939	1.04102	0.775277	1.39012	1.30462	0.124339	1.42601	1.29985	0.13378	1.42841	1.03056
ENSMUSP00000018727	ENSMUSG00000018583	G3bp1	P97855 "Ras GTPase-activating protein-binding protein 1 (G3BP-1)(EC 3.6.1.-)(ATP-dependent DNA helicase VIII)(HDH-VIII)(GAP SH3 domain-binding protein 1)"	0.2946	26	5	0.3333	23	6	0.3634	40	5	1.11212	0.297839	1.27981	1.10235	0.266111	1.22163	0.986736	0.745092	1.11225	1.00247	0.97906	1.27772	1.00005	0.999171	1.1151	1.01729	0.353604	1.04644	1.03632	0.482499	1.13665	1.19693	0.00447406	1.09891	0.838495	0.661767	2.82017	0.988776	0.908108	1.29038	1.06735	0.304742	1.15788	1.10267	0.353825	1.29553	0.961927
ENSMUSP00000106801	ENSMUSG00000053293	Pom121	Q8K3Z9 "Nuclear envelope pore membrane protein POM 121 (Pore membrane protein of 121 kDa)(Nucleoporin Nup121)"	0.1225	24	8	0.1375	26	4	0.1825	38	2	1.38168	0.035326	1.34159	1.15569	0.143417	1.26325	1.12985	0.288685	2.12961	1.25153	0.145294	1.38239	1.02394	0.450568	1.09089	0.973291	0.657278	1.7789	1.20258	0.316577	1.49858	0.980884	0.0790552	1.02372	1.02747	0.265923	1.16511	1.24348	0.140399	1.36346	0.980421	0.760217	1.20714	0.946235	0.588862	2.53895	1.25298
ENSMUSP00000002640	ENSMUSG00000002565	Scin	Q60604 "Adseverin (Scinderin)(Gelsolin-like protein)"	0.2476	37	6	0.2825	23	11	0.3189	37	7	0.166629	0.00238215	2.25502	0.178998	1.72792e-05	1.64987	0.208156	0.00129634	1.96887	0.826502	0.0261925	1.1699	0.770572	6.56289e-06	1.07029	0.966906	0.0767894	1.03934	0.706942	0.274181	2.06729	0.713061	2.61757e-06	1.08283	0.630027	0.117096	1.85518	0.702937	0.00237961	1.17341	0.74998	9.18374e-06	1.08101	0.536253	0.00178053	1.33131	0.260692
ENSMUSP00000080266	ENSMUSG00000033813	Tcea1	P10711 "Transcription elongation factor A protein 1 (Transcription elongation factor S-II protein 1)(Transcription elongation factor TFIIS.o)"	0.4485	25	8	0.3854	17	10	0.5714	28	8	0.855388	0.0516111	1.17077	0.89512	0.274743	1.24048	1.07516	0.00475718	1.04303	0.904051	0.367582	1.28107	0.840919	0.000715153	1.08113	0.934917	0.081386	1.08138	0.884385	0.238735	1.2531	0.837252	0.00951679	1.13028	0.927532	0.512666	1.29435	1.03274	0.773909	1.29062	0.970369	0.707471	1.192	1.1183	0.21229	1.21249	0.887506
ENSMUSP00000028755	ENSMUSG00000027293	Ehd4	Q9EQP2 "EH domain-containing protein 4 (PAST homolog 2)(mPAST2)"	0.3216	47	5	0.3364	24	9	0.4713	47	7	1.29923	0.0483978	1.29532	1.33706	0.000174748	1.10733	1.10772	3.23403e-05	1.02287	1.37047	0.0181863	1.25458	1.03798	0.108507	1.04875	1.21163	0.0108587	1.13782	1.27151	0.0699503	1.31186	1.24326	0.141228	1.36013	1.47861	0.0049911	1.24809	1.27133	0.022464	1.20246	1.28279	0.00122944	1.12497	1.23846	0.00568482	1.1327	1.22286
ENSMUSP00000005017	ENSMUSG00000004897	Hdgf	P51859 "Hepatoma-derived growth factor (HDGF)"	0.4008	23	7	0.5485	16	6	0.557	24	6	1.53623	0.132937	1.83049	1.0589	0.737231	1.51394	1.20746	0.00231934	1.08875	1.48565	0.219253	2.02628	0.945829	0.385127	1.16243	1.08491	0.0344831	1.0754	1.44709	0.313621	2.27579	0.909626	0.153496	1.15584	1.24948	0.743336	5.22994	1.76886	0.128935	2.21015	1.11775	0.549911	1.56312	1.14288	0.657626	2.07378	1.17648
ENSMUSP00000048470	ENSMUSG00000010608	Rbm25	202 "RNA binding motif protein 25 Gene [Source:MGI Symbol;Acc:MGI:1914289]" "MGI_automatic_transcript"	0.503	29	3	0.2725	19	2				0.932398	0.87143	5.16932	0.969684	0.128627	1.08342				0.757582	0.516252	4.61027	1.07624	0.131459	1.21601				0.835082	0.563006	3.09166	0.746991	0.415538	17.0062				0.825073	0.624983	4.24706	0.952813	0.139597	1.14668				0.958806
ENSMUSP00000112270	ENSMUSG00000054611	Kdm2a	P59997 "Lysine-specific demethylase 2A (EC 1.14.11.27)(JmjC domain-containing histone demethylation protein 1A)([Histone-H3]-lysine-36 demethylase 1A)(F-box and leucine-rich repeat protein 11)(F-box/LRR-repeat protein 11)"	0.2334	59	10	0.09819	19	5	0.2748	60	6	0.857003	0.37369	1.45196	0.653004	0.124353	1.84	0.870666	0.000777559	1.05031	0.896653	0.529704	1.45866	0.874594	0.00877926	1.08094	0.855741	0.0329139	1.14688	0.915682	0.633519	1.49751	0.853566	0.118609	1.24835	0.844077	0.410629	1.62521	0.875574	0.446885	1.45923	0.778455	0.0091788	1.15873	0.786433	0.0187729	1.19774	0.971826
ENSMUSP00000031534	ENSMUSG00000029554	Mad1l1	Q9WTX8 "Mitotic spindle assembly checkpoint protein MAD1 (Mitotic arrest deficient 1-like protein 1)(MAD1-like protein 1)"	0.2748	49	7	0.258	27	8	0.3333	42	4	1.10966	0.504165	1.45054	1.09839	0.0303555	1.08546	1.36195	0.137543	1.62945	0.971743	0.847705	1.43965	0.988657	0.539144	1.04268	1.22673	0.262578	1.60415	1.09121	0.456993	1.32119	1.05205	0.0211188	1.04138	1.18845	0.0900205	1.24903	1.11705	0.475814	1.44681	0.966099	0.179847	1.05627	0.96513	0.179909	1.06699	1.06815
ENSMUSP00000099420	ENSMUSG00000019761	Krt10	P02535 "Keratin, type I cytoskeletal 10 (Cytokeratin-10)(CK-10)(Keratin-10)(K10)(56 kDa cytokeratin)(Keratin, type I cytoskeletal 59 kDa)"	0.2692	31	4							0.833228	0.20411	1.43165							0.787081	0.0776344	1.33448							0.677519	0.025133	1.34609							0.716759	0.0246117	1.28688							1.07283
ENSMUSP00000012587	ENSMUSG00000012443	Kif11	Q6P9P6 "Kinesin-like protein KIF11 (Kinesin-related motor protein Eg5)"	0.2101	51	9	0.1597	27	10	0.3308	66	8	0.69652	0.00265345	1.21462	0.728547	0.00358567	1.20129	0.708838	0.000120884	1.11221	0.955573	0.673421	1.27075	0.886897	0.00444875	1.07477	0.852984	0.000194991	1.05446	0.876878	0.271786	1.29266	0.814841	0.0055292	1.1363	0.875896	0.295125	1.31912	0.729791	0.00468509	1.20028	0.778797	0.000410019	1.10951	0.824985	0.00697315	1.12824	0.944783
ENSMUSP00000062030	ENSMUSG00000049539	Hist1h1a	P43275 "Histone H1.1 (H1 VAR.3)(H1a)"	0.6103	35	5	0.6667	44	6	0.7793	51	6	1.00107	0.995485	1.63792	0.959295	0.945954	4.47872	1.2537	0.0209485	1.19119	1.16142	0.529793	1.83049	1.02629	0.771435	1.24302	1.19383	0.199307	1.36078	0.924818	0.748142	1.87883	0.836061	0.318692	1.51567	1.31212	0.681439	4.97347	0.973954	0.909491	1.83168	0.934612	0.906355	4.07653	1.31485	0.229284	1.67202	1.28816
ENSMUSP00000071976	ENSMUSG00000071521	Try10	Q792Z1 "Putative uncharacterized proteinMCG140784Trypsin 10Trypsinogen 10 ;;;"	0.248	20	0				0.435	32	0
ENSMUSP00000109497	ENSMUSG00000040385	Ppp1ca	Q3TYF5 "Serine/threonine-protein phosphatase Fragment (EC 3.1.3.16)"	0.3697	33	5	0.4273	21	4	0.6758	41	4	0.862244	0.612368	2.11657	0.73826	0.0699816	1.41834	0.868763	0.00575571	1.06511	0.883723	0.705447	2.32787	0.923868	0.024532	1.06173	0.941126	0.24132	1.14176	0.973477	0.94181	2.61322	1.00327	0.941027	1.13806	1.26445	0.258684	1.71102	0.899404	0.794285	2.87493	0.810063	0.148329	1.41377	0.951139	0.701121	1.45833	0.911446
ENSMUSP00000103451	ENSMUSG00000020863	Luc7l3	Q5SUF2 "Luc7-like protein 3 (Cisplatin resistance-associated-overexpressed protein)"	0.2977	30	6	0.2704	18	5	0.4444	37	5	0.831193	0.03322	1.17715	0.87214	0.155417	1.2427	0.87923	0.0661797	1.15309	0.938233	0.370599	1.18139	1.09799	0.0494366	1.09756	0.930165	0.365986	1.2181	0.887218	0.551411	1.6194	1.02539	0.347603	1.06766	1.05809	0.845691	2.12783	0.934203	0.352659	1.18629	0.942546	0.123168	1.08795	1.26236	0.272591	1.66335	0.887962
ENSMUSP00000105019	ENSMUSG00000031885	Cbfb	Q08024 "Core-binding factor subunit beta (CBF-beta)(Polyomavirus enhancer-binding protein 2 beta subunit)(PEBP2-beta)(PEA2-beta)(SL3-3 enhancer factor 1 subunit beta)(SL3/AKV core-binding factor beta subunit)"	0.6484	15	6	0.2253	6	4	0.5549	21	4	0.694439	0.186276	1.84461	0.642515	0.167419	2.17324	0.799923	0.0665167	1.286	0.806742	0.442564	1.93953	0.927176	0.278916	1.20016	0.954623	0.447182	1.18457	1.01846	0.955026	2.21096	1.0126	0.9074	1.3706	1.06533	0.889415	3.78788	0.884779	0.669634	2.00375	0.704216	0.112219	1.65013	1.08396	0.727052	1.95281	0.942058
ENSMUSP00000066311	ENSMUSG00000052137	C430048L16Rik	Q66JV4 "RNA-binding protein 12B-B (RNA-binding motif protein 12B-B)"	0.2554	45	7	0.1175	13	3				0.974434	0.87484	1.47045	0.89037	0.287853	1.41664				0.949816	0.790687	1.57453	0.987777	0.919204	1.58668				1.02884	0.879971	1.55507	1.04536	0.522277	1.28174				1.04283	0.798378	1.46861	0.94314	0.544865	1.4169				1.0356
ENSMUSP00000025642	ENSMUSG00000024735	Prpf19	Q99KP6 "Pre-mRNA-processing factor 19 (PRP19/PSO4 homolog)(Nuclear matrix protein 200)(Senescence evasion factor)"	0.3346	38	6	0.2409	19	8	0.5354	47	10	0.821675	0.104124	1.28994	0.798385	0.00807727	1.15664	0.860445	0.000130668	1.05488	0.838295	0.0450836	1.18616	0.949779	0.0265755	1.0445	0.928975	0.109966	1.09855	1.03977	0.66829	1.24661	0.950246	0.160163	1.07985	1.22023	0.578242	2.18281	0.896394	0.0138667	1.07876	0.825269	0.0088996	1.13501	1.06307	0.679467	1.38273	0.911224
ENSMUSP00000048204	ENSMUSG00000041747	Utp15	Q8C7V3 "U3 small nucleolar RNA-associated protein 15 homolog (Src-associated protein SAW)"	0.3485	39	7	0.2841	23	8	0.4337	41	4	0.947575	0.759148	1.5077	1.01822	0.811395	1.18812	1.00201	0.968859	1.16273	0.894181	0.429184	1.38114	1.01453	0.549295	1.05573	0.820527	0.0025314	1.06907	0.733305	0.363019	2.1624	1.01479	0.607262	1.06667	0.785656	0.426397	2.30792	0.886112	0.405605	1.39214	1.01979	0.669749	1.10974	0.998575	0.98777	1.3136	0.871509
ENSMUSP00000032326	ENSMUSG00000030204	Ddx47	Q9CWX9 "Probable ATP-dependent RNA helicase DDX47 (EC 3.6.1.-)(DEAD box protein 47)"	0.3604	28	7	0.233	15	7	0.5319	44	8	1.20494	0.0112055	1.13463	1.15483	0.0558936	1.1606	1.13539	0.00103279	1.05743	1.01535	0.830291	1.18115	1.01524	0.613374	1.07193	0.959735	0.113622	1.05524	0.975174	0.67934	1.15222	0.878515	0.0316019	1.12033	0.826502	0.36277	1.58877	1.1334	0.0690613	1.14866	1.09213	0.0520524	1.09332	0.982085	0.808654	1.18529	1.2372
ENSMUSP00000123402	ENSMUSG00000078812	Eif5a	009 "eukaryotic translation initiation factor 5A Gene [Source:MGI (curated);Acc:MGI:106248]" "MGI_curated_transcript"	0.539	22	2	0.7078	22	6	0.7792	31	7	0.98857	0.929412	3.71351	1.19429	0.677968	2.81868	1.14498	0.00497639	1.07969	0.939844	0.870498	45.6773	0.780692	0.0168381	1.19793	0.986889	0.797354	1.12784	0.231476	0.317617	25105	0.700294	0.207292	1.88244	1.08609	0.877989	3.53071	1.01046	0.961817	9.0356	1.07963	0.822803	2.30428	0.91463	0.355826	1.24398	0.882443
ENSMUSP00000025562	ENSMUSG00000024660	Incenp	Q9WU62 "Inner centromere protein "	0.258	49	8	0.1977	23	4	0.5909	64	6	0.789595	0.0876128	1.32785	0.74278	0.0650057	1.39343	0.586819	4.45829e-05	1.10941	0.943974	0.710471	1.43674	0.920586	0.0844971	1.10911	0.782399	0.00935102	1.16633	1.00848	0.952428	1.38106	0.885769	0.124854	1.20028	0.812583	0.317313	1.61686	0.84365	0.310011	1.45534	0.858013	0.101485	1.23182	0.735303	0.00556638	1.18517	1.29658
ENSMUSP00000034097	ENSMUSG00000031672	Got2	P05202 "Aspartate aminotransferase, mitochondrial Precursor (mAspAT)(EC 2.6.1.1)(Transaminase A)(Glutamate oxaloacetate transaminase 2)(Fatty acid-binding protein)(FABP-1)(Plasma membrane-associated fatty acid-binding protein)(FABPpm)"	0.3581	39	6	0.3279	20	7	0.6791	53	10	0.834317	0.0393847	1.18312	0.946943	0.544582	1.23094	0.715369	1.25762e-06	1.06918	1.12748	0.327497	1.3289	0.862004	0.00300063	1.07864	1.23287	1.14477e-05	1.05606	0.937193	0.573904	1.31967	0.96283	0.319586	1.08919	1.36746	0.23829	1.75146	1.01178	0.925334	1.35736	1.62403	0.00029705	1.17216	1.31835	0.154478	1.49506	0.993913
ENSMUSP00000044604	ENSMUSG00000036678	Aaas	P58742 "Aladin (Adracalin)"	0.2216	18	7	0.1905	14	6	0.2821	21	5	1.00727	0.956849	1.36933	0.913062	0.124237	1.13507	0.990614	0.756887	1.08216	0.952586	0.568202	1.21764	1.03074	0.893876	1.74148	1.05025	0.582256	1.25571	0.963705	0.644111	1.20453	0.953263	0.232395	1.09482	0.877682	0.581157	1.82973	0.963525	0.705716	1.25801	0.899033	0.0602311	1.1198	0.895773	0.350939	1.33593	0.979138
ENSMUSP00000056785	ENSMUSG00000043858	Nup62	Q63850 "Nuclear pore glycoprotein p62 (Nucleoporin Nup62)(62 kDa nucleoporin)"	0.3384	25	6	0.1806	13	6	0.3308	21	7	1.05329	0.0331445	1.04682	1.07979	0.299542	1.186	0.987005	0.810956	1.1366	1.05826	0.0739494	1.06673	1.02018	0.64629	1.11106	0.939162	0.202614	1.11337	0.993418	0.882832	1.11571	1.09544	0.304046	1.22714	1.19782	0.458494	1.74658	1.03029	0.538415	1.12326	1.04858	0.450826	1.1609	1.03073	0.829767	1.39073	1.10084
ENSMUSP00000082495	ENSMUSG00000066489	AC123067.1	AC123067.1 AC123067.1-201 "null" "Clone_based_ensembl_transcript"	0.5517	19	7	0.5034	14	6	0.6224	19	4	1.21223	0.0110634	1.13883	1.37692	0.00688077	1.20439	1.18813	0.112283	1.27924	1.06187	0.188919	1.10422	1.05362	0.129907	1.07696	1.35818	0.0461358	1.34481	1.20173	0.0745033	1.23193	1.32283	0.00973615	1.19387	0.617956	0.535045	8.95455	1.23366	0.0229335	1.18444	1.31262	0.0141188	1.20857	1.22215	0.0912035	1.29684	1.28597
ENSMUSP00000104068	ENSMUSG00000040952	Rps19	Q9CZX8 "40S ribosomal protein S19 "	0.6038	29	6	0.6688	17	6	0.8471	31	5	1.6341	0.0178956	1.43924	1.58385	0.0532779	1.59913	1.19153	0.0203498	1.13942	1.42264	0.0450374	1.40647	1.15045	0.00820249	1.08879	1.27098	0.0495126	1.26988	1.79386	0.0232831	1.59293	1.39222	0.0362015	1.34911	1.35384	0.12867	1.553	1.60484	0.078529	1.73562	1.42348	0.081997	1.51905	1.53958	0.0537903	1.557	1.67365
ENSMUSP00000104466	ENSMUSG00000056851	Pcbp2	Q61990 "Poly(rC)-binding protein 2 (Alpha-CP2)(Putative heterogeneous nuclear ribonucleoprotein X)(hnRNP X)(CTBP)(CBP)"	0.5444	35	5	0.5468	33	5	0.8127	59	8	0.960447	0.934678	3.61189	0.829606	0.237564	1.45314	0.928583	0.168505	1.12088	0.90015	0.828061	3.52442	0.925519	0.0867113	1.09975	1.09371	0.27528	1.19603	0.992115	0.985302	3.06887	0.9741	0.491003	1.10096	0.893675	0.766223	2.36322	0.881368	0.816681	4.12129	0.827527	0.239379	1.46303	0.797103	0.431963	1.90271	0.902591
ENSMUSP00000007980	ENSMUSG00000007836	Hnrnpa0	Q9CX86 "Putative uncharacterized protein "	0.5705	37	7	0.6131	41	3	0.8033	60	7	1.1554	0.695002	2.36075	1.29682	0.329106	2.39678	1.00729	0.776645	1.06172	1.00302	0.995609	3.61618	1.0135	0.737088	1.16153	0.947695	0.353479	1.13968	0.858935	0.836577	5.62555	1.0299	0.396897	1.12588	0.88772	0.822174	3.4598	1.10374	0.836687	3.071	1.20759	0.428583	2.28022	0.935515	0.841532	2.18429	1.12586
ENSMUSP00000113577	ENSMUSG00000031822	Gse1	NP_001139369.1 "genetic suppressor element 1 isoform 3 "	0.2339	56	7	0.1711	33	6	0.2265	54	1	1.16965	0.068737	1.18907	1.13338	0.0886984	1.16486	0.86566			0.846243	0.0724777	1.20654	0.901202	0.105542	1.14519	1.0236			1.0071	0.928466	1.20309	1.20096	0.0205729	1.15142	0.981998			1.05616	0.541445	1.22948	1.05449	0.366211	1.14721	0.998706			0.928808
ENSMUSP00000110847	ENSMUSG00000029014	Dnajc2	Q3TE39;Q3TRX6;Q3TTG9;Q3TTI5;Q3UVT4 "Putative uncharacterized protein Fragment ";"Putative uncharacterized protein ";"Putative uncharacterized protein Fragment ";"Putative uncharacterized protein Fragment ";"Putative uncharacterized protein Fragment "	0.2287	36	7	0.1675	15	1	0.2843	35	1	0.92963	0.249552	1.15036	0.831605			0.934994			0.931808	0.138711	1.10655	0.842402			0.86187			0.836089	0.0377841	1.1794	0.503917			0.929033			0.967693	0.489675	1.11542	0.960132			0.907479			0.909596
ENSMUSP00000023564	ENSMUSG00000022858	Tra2b	P62996 "Transformer-2 protein homolog beta (TRA-2 beta)(TRA2-beta)(Transformer-2 protein homolog B)(Splicing factor, arginine/serine-rich 10)(Silica-induced gene 41 protein)(SIG-41)"	0.4444	21	5	0.3681	19	4				1.37239	0.0234859	1.27955	1.13003	0.724328	2.7295				1.51138	0.0868501	1.6615	1.06788	0.547473	1.36226				1.58925	0.0048936	1.25657	1.13537	0.405449	1.51945				1.51543	0.0164337	1.33659	1.11031	0.746175	2.55553				1.51383
ENSMUSP00000025963	ENSMUSG00000024999	Noc3l	Q8VI84 "Nucleolar complex protein 3 homolog (NOC3 protein homolog)(NOC3-like protein)(Nucleolar complex-associated protein 3-like protein)(Factor for adipocyte differentiation 24)"	0.2429	48	7	0.1549	19	7	0.3271	41	4	0.984634	0.676395	1.09027	0.941115	0.672404	1.3969	1.00162	0.972819	1.14976	1.03302	0.615298	1.16191	1.00304	0.953037	1.12882	0.903664	0.00294044	1.03666	1.10066	0.202896	1.17846	1.0645	0.299093	1.14405	1.21017	0.65269	3.3832	1.07141	0.350236	1.18133	1.08025	0.499856	1.30103	1.04236	0.923168	3.52501	1.29425
ENSMUSP00000105178	ENSMUSG00000020290	Xpo1	Q6P5F9 "Exportin-1 (Exp1)(Chromosome region maintenance 1 protein homolog)"	0.2521	69	8	0.1653	29	9	0.4295	64	9	0.874446	0.354822	1.3775	0.950906	0.537495	1.19747	0.932306	0.00606236	1.04468	0.774392	0.0844088	1.35106	0.98879	0.592516	1.04774	1.02641	0.551483	1.10155	0.816534	0.402284	1.71209	0.87452	0.000740725	1.06024	1.02335	0.945604	2.12978	0.770111	0.218932	1.58012	0.953711	0.378704	1.12445	0.975313	0.845026	1.33041	0.754104
ENSMUSP00000030538	ENSMUSG00000028757	Ddost	O54734 "Dolichyl-diphosphooligosaccharide--protein glycosyltransferase 48 kDa subunit Precursor (Oligosaccharyl transferase 48 kDa subunit)(DDOST 48 kDa subunit)(EC 2.4.1.119)"	0.2676	31	8	0.1882	17	4	0.3628	33	4	1.29117	0.201126	1.53472	1.11266	0.422457	1.44281	1.1901	0.0143856	1.11412	1.02068	0.884726	1.37975	1.00724	0.828749	1.10223	1.12835	0.0161715	1.08139	1.14013	0.611581	1.79257	1.11491	0.711997	2.3457	1.37845	0.316621	2.34395	1.11349	0.602523	1.59405	1.20002	0.0571408	1.21247	1.33907	0.0245364	1.24717	1.16745
ENSMUSP00000020768	ENSMUSG00000020475	Pgam2	O70250 "Phosphoglycerate mutase 2 (EC 5.4.2.1)(EC 5.4.2.4)(EC 3.1.3.13)(BPG-dependent PGAM 2)(Muscle-specific phosphoglycerate mutase)(Phosphoglycerate mutase isozyme M)(PGAM-M)"	0.3701	19	6	0.2913	11	3	0.6063	25	4	0.716136	0.271034	2.06767	1.34919	0.220082	2.07781	0.719071	0.00822113	1.18246	0.771775	0.225698	1.61956	0.921729	0.0135168	1.04205	1.28143	0.00783445	1.13189	0.914319	0.729219	1.87561	1.33742	0.121828	1.6191	0.737445	0.666245	7.64189	0.836884	0.360579	1.57629	1.44766	0.0884092	1.66134	0.759238	0.331236	2.13379	0.840491
ENSMUSP00000099364	ENSMUSG00000034187	Nsf	P46460 "Vesicle-fusing ATPase (EC 3.6.4.6)(N-ethylmaleimide-sensitive fusion protein)(NEM-sensitive fusion protein)(Vesicular-fusion protein NSF)(Suppressor of K(+) transport growth defect 2)(Protein SKD2)"	0.2863	51	9	0.2245	22	5	0.3468	37	4	0.70901	0.0115074	1.27528	0.827585	0.101951	1.282	0.698208	0.0206397	1.29009	0.995536	0.975448	1.38398	1.00307	0.967287	1.21542	1.06443	0.0452273	1.06177	1.36108	0.0455965	1.35065	1.52129	0.00331678	1.2044	1.31917	0.0621512	1.3542	0.823512	0.191377	1.36855	1.06889	0.186709	1.12323	1.08327	0.0716152	1.09751	0.818276
ENSMUSP00000072616	ENSMUSG00000056493	Foxk1	P42128 "Forkhead box protein K1 (Myocyte nuclear factor)(MNF)"	0.2309	36	4	0.09875	11	3	0.2684	36	4	0.996203	0.895282	1.08828	1.20345	0.262667	1.67575	1.2969	0.189942	1.63231	0.985223	0.87156	1.30901	1.16614	0.169499	1.36843	1.10047	0.377086	1.34251	0.933181	0.38171	1.24007	1.08701	0.153077	1.17278	0.795825	0.260696	1.69138	0.946567	0.51897	1.27103	1.11339	0.0874774	1.15777	0.912862	0.470827	1.42261	0.982231
ENSMUSP00000101001	ENSMUSG00000069565	Dazap1	Q0VDX2;Q3U878 "Dazap1 protein Fragment ";"Putative uncharacterized protein "	0.3251	28	6	0.2494	16	4	0.3432	25	4	1.07522	0.0733221	1.08702	0.94966	0.687006	1.44777	1.34418	0.162544	1.66641	0.965952	0.726806	1.29245	0.950287	0.302256	1.13947	0.978929	0.18926	1.04087	1.21486	0.0169146	1.14685	0.954815	0.665209	1.36028	1.48314	0.433668	4.01852	1.10417	0.482316	1.42699	0.91706	0.548953	1.50554	1.14979	0.454458	1.67908	1.05663
ENSMUSP00000010239	ENSMUSG00000010095	Slc3a2	P10852 "4F2 cell-surface antigen heavy chain (4F2hc)(CD98 antigen)"	0.2662	27	8	0.2319	21	8	0.3574	36	5	0.967284	0.462244	1.10645	1.01622	0.940766	1.6388	0.990378	0.754297	1.08336	1.5933	0.000191616	1.16754	1.15733	0.0379663	1.14497	1.21112	0.0174724	1.14589	1.20227	0.0245815	1.16498	1.16847	0.115259	1.2273	1.11124	0.614147	1.70978	1.28393	0.000752356	1.10971	1.4194	0.0803222	1.49987	1.25004	0.187389	1.47703	1.61375
ENSMUSP00000004507	ENSMUSG00000004393	Ddx56	Q9D0R4 "Probable ATP-dependent RNA helicase DDX56 (EC 3.6.1.-)(DEAD box protein 56)(ATP-dependent 61 kDa nucleolar RNA helicase)"	0.3114	32	7	0.174	11	4	0.5073	48	5	0.885771	0.194629	1.22547	1.04898	0.363799	1.15311	0.976912	0.469076	1.08455	0.862917	0.0979906	1.20235	0.99521	0.926615	1.16499	0.797446	0.0233283	1.1923	1.02926	0.454989	1.0924	1.07609	0.0421804	1.07084	0.912185	0.640409	1.65815	0.974199	0.56197	1.10986	1.16609	0.0136241	1.09806	0.915481	0.44021	1.33156	0.969605
ENSMUSP00000045812	ENSMUSG00000032834	Pwp2	Q8BU03 "Periodic tryptophan protein 2 homolog "	0.2013	39	8	0.1251	20	6	0.3351	44	4	0.848411	0.164914	1.28495	0.854597	0.392005	1.53935	0.94263	0.446526	1.24004	0.875392	0.191845	1.24346	0.996464	0.967638	1.23808	0.74377	0.0106377	1.17924	0.785915	0.0686306	1.30345	0.882347	0.232204	1.26717	1.83763	0.160802	2.84164	0.854869	0.0923567	1.20963	0.915469	0.542756	1.41607	1.30595	0.31073	2.01	0.904929
ENSMUSP00000047235	ENSMUSG00000038005	2700029M09Rik	Q8CFE2 "UPF0609 protein C4orf27 homolog "	0.4075	30	9	0.2283	10	6	0.3092	22	4	1.05122	0.696378	1.32933	1.08557	0.566339	1.41064	0.85674	0.00528475	1.06961	1.18657	0.214787	1.34017	1.07536	0.0357555	1.0677	1.15147	0.0158038	1.09486	0.991472	0.952855	1.38234	0.925363	0.667243	1.548	0.842726	0.657613	3.03668	0.997696	0.989535	1.48143	1.05002	0.70788	1.37197	0.849132	0.407893	1.7196	1.30168
ENSMUSP00000095286	ENSMUSG00000038608	Dock10	Q8BZN6 "Dedicator of cytokinesis protein 10 (Zizimin-3)"	0.1878	99	7	0.0857	31	4	0.1949	77	0	1.09715	0.28717	1.21442	1.24582	0.147025	1.4328				0.754709	0.197459	1.60832	0.781572	0.0439397	1.26343				0.682021	0.176999	1.84456	0.595796	0.0177084	1.41472				0.871055	0.545796	1.69519	0.716737	0.025896	1.29323				0.744112
ENSMUSP00000107507	ENSMUSG00000029599	Ddx54	Q8K4L0 "ATP-dependent RNA helicase DDX54 (EC 3.6.1.-)(DEAD box protein 54)"	0.1905	44	9	0.1442	20	6	0.4943	63	5	1.03693	0.683958	1.21903	1.01251	0.90812	1.30137	1.06444	0.386167	1.19529	1.15505	0.119411	1.21003	1.22534	0.0213363	1.17122	0.879619	0.00218759	1.05215	1.24958	0.0340179	1.22294	1.18593	0.101461	1.2446	0.988308	0.948847	1.61321	1.16293	0.0786667	1.18856	1.1472	0.114	1.20272	1.11357	0.263189	1.25804	1.37103
ENSMUSP00000029879	ENSMUSG00000028224	Nbn	Q9R207 "Nibrin (Nijmegen breakage syndrome protein 1 homolog)(Cell cycle regulatory protein p95)"	0.2184	33	8	0.1092	10	3	0.241	34	6	1.24897	0.00260663	1.12223	1.21823	0.0207003	1.13218	1.28904	0.0934821	1.37116	0.917216	0.117394	1.12129	0.903558	0.405475	1.51791	0.960173	0.58922	1.19869	1.00352	0.958548	1.16665	1.00641	0.867737	1.15688	1.29058	0.51985	2.58049	1.06816	0.24715	1.13146	1.04468	0.608002	1.36635	1.08344	0.567062	1.39999	1.09615
ENSMUSP00000048319	ENSMUSG00000040044	Orc3l	Q9JK30 "Origin recognition complex subunit 3 (Origin recognition complex subunit Latheo)"	0.2797	47	9	0.09804	17	2	0.3669	39	4	1.05684	0.20334	1.09639	1.1746	0.00215167	1.00693	1.37418	0.011225	1.19777	0.966003	0.294422	1.07368	0.957523	0.455502	1.61502	0.900804	0.217029	1.23777	0.949366	0.44682	1.16158	1.05564	0.309908	1.4393	1.19321	0.324719	1.61335	0.969279	0.522104	1.11349	0.985471	0.55124	1.24433	1.11293	0.208922	1.23791	1.07162
ENSMUSP00000081239	ENSMUSG00000066037	Hnrnpr	A2AW40;A2AW41;Q3U8W9;Q3UKV5;Q3UMT8;Q3UZI0;Q8BL32;Q8VHM5;Q99KG1 "Heterogeneous nuclear ribonucleoprotein R Fragment ";"Heterogeneous nuclear ribonucleoprotein R Fragment ";"Putative uncharacterized protein ";"Putative uncharacterized protein Fragment ";"Putative uncharacterized protein ";"Putative uncharacterized protein Fragment ";"Putative uncharacterized protein Fragment ";"Heterogeneous nuclea…	0.3782	53	7	0.3956	40	9	0.5206	68	6	1.05529	0.573703	1.24782	1.03056	0.766873	1.254	1.06141	0.029014	1.05184	0.938288	0.530097	1.26364	1.07684	0.261125	1.15165	0.937789	0.0294293	1.05621	0.884204	0.216532	1.24368	0.875327	0.0587498	1.14959	0.979073	0.94134	2.01959	0.951109	0.720014	1.386	0.886297	0.250879	1.25215	0.975033	0.920894	1.86362	0.922728
ENSMUSP00000090585	ENSMUSG00000000751	Rpa1	Q8VEE4 "Replication protein A 70 kDa DNA-binding subunit (RP-A p70)(Replication factor A protein 1)(RF-A protein 1)"	0.2547	33	8	0.1589	15	4				1.22408	0.0918861	1.27757	1.19745	0.185287	1.39764				1.1216	0.449725	1.40358	1.20752	0.011055	1.11235				1.06299	0.606982	1.30779	1.06804	0.472564	1.29123				0.882823	0.158584	1.20538	1.07421	0.531235	1.38098				0.971908
ENSMUSP00000077705	ENSMUSG00000058655	Eif4b	Q8BGD9 "Eukaryotic translation initiation factor 4B (eIF-4B)"	0.2553	29	7	0.144	13	3	0.3322	49	3	0.949144	0.812195	1.67266	1.00049	0.943854	1.02711	0.939704	0.0362163	1.05375	1.16535	0.564986	1.8498	1.03327	0.405392	1.14412	1.06984	0.0150004	1.03664	1.35373	0.287163	1.88623	1.28114	0.0146713	1.13948	0.928807	0.384677	1.33359	1.18293	0.553178	1.92445	1.16365	0.0465932	1.15711	1.13344	0.0125151	1.06276	1.01175
ENSMUSP00000054424	ENSMUSG00000048109	Rbm15	A0PJG5;Q0VBL3;Q3THK4;Q3TLX0;Q571M7;Q66JP8;Q6PGG1;Q7TT82 "Rbm15 protein Fragment ";"RNA binding motif protein 15 ";"Putative uncharacterized protein Fragment ";"Putative uncharacterized protein Fragment ";"MKIAA4257 protein Fragment ";"Rbm15 protein Fragment ";"Rbm15 protein Fragment ";"Rbm15 protein Fragment "	0.2609	52	7	0.2484	30	9	0.4678	80	10	0.990714	0.827303	1.10537	0.95631	0.69462	1.28796	0.939633	0.0734944	1.07202	0.923551	0.378284	1.22706	1.02988	0.60327	1.13374	0.947239	0.388931	1.14505	1.0087	0.830627	1.09955	0.965539	0.531986	1.13181	1.08104	0.651752	1.45882	1.08247	0.387037	1.23114	1.01927	0.875118	1.31155	1.00185	0.974577	1.13593	0.884598
ENSMUSP00000101210	ENSMUSG00000040675	Mthfd1l	Q3V3R1 "Monofunctional C1-tetrahydrofolate synthase, mitochondrial Precursor (EC 6.3.4.3)(Formyltetrahydrofolate synthetase)"	0.2744	52	7	0.1943	29	7	0.2832	53	5	1.28243	0.0017295	1.12028	1.18789	0.180785	1.32084	1.04275	0.212263	1.08153	1.10176	0.216736	1.18746	1.00082	0.986298	1.11883	1.1008	0.0179723	1.07129	1.18	0.0856793	1.21789	1.07237	0.0980846	1.09129	0.806017	0.251062	1.5628	1.26544	0.0177238	1.1947	1.16697	0.0451342	1.16159	1.04665	0.491488	1.18212	1.33818
ENSMUSP00000005066	ENSMUSG00000004936	Map2k1	P31938 "Dual specificity mitogen-activated protein kinase kinase 1 (MAP kinase kinase 1)(MAPKK 1)(EC 2.7.12.2)(ERK activator kinase 1)(MAPK/ERK kinase 1)(MEK 1)"	0.2875	28	8	0.201	11	4	0.4275	27	5	1.02193	0.846182	1.29033	1.47356	0.300198	2.68463	0.849585	0.00388804	1.07837	0.858234	0.172567	1.26875	0.747496	0.0203147	1.22768	1.09134	0.160184	1.15132	0.851189	0.3757	1.49608	1.1443	0.250125	1.352	0.523703	0.21544	3.39152	1.29239	0.0943233	1.36835	1.92129	0.0354921	1.76697	1.10487	0.241647	1.22337	1.12878
ENSMUSP00000099805	ENSMUSG00000028587	Orc1l	Q9Z1N2 "Origin recognition complex subunit 1 "	0.294	52	9	0.1893	19	7	0.3393	49	3	1.07297	0.380902	1.19142	1.0871	0.0367313	1.07936	1.1504	0.0230122	1.09754	0.989009	0.858507	1.14846	1.03442	0.538092	1.13525	0.973633	0.626104	1.22345	0.948697	0.726556	1.39832	0.976653	0.69172	1.14899	1.28066	0.0716681	1.35177	0.980371	0.836618	1.23933	0.968651	0.438875	1.09859	1.06632	0.360968	1.26514	1.12539
ENSMUSP00000085763	ENSMUSG00000022139	Mbnl2	Q8C181 "Muscleblind-like protein 2 "	0.2761	19	2							0.888925	0.27404	1.98763							1.35211	0.338086	9.5002							1.19955									1.47091	0.0495521	1.46581							1.36155
ENSMUSP00000021085	ENSMUSG00000020739	Nup85	Q8R480 "Nuclear pore complex protein Nup85 (Nucleoporin Nup85)(85 kDa nucleoporin)(Pericentrin-1)(FROUNT)"	0.2744	40	7	0.1738	17	7	0.4466	52	7	0.903279	0.42074	1.33386	0.966437	0.684537	1.2163	1.08573	0.00112937	1.03518	0.874054	0.369271	1.40411	0.998839	0.961531	1.05814	0.917416	0.0198801	1.06931	0.78978	0.540978	2.43806	0.969455	0.477655	1.10546	1.12908	0.185181	1.2196	0.858739	0.375204	1.47568	0.964715	0.626951	1.18731	1.08056	0.251167	1.16102	0.866428
ENSMUSP00000104511	ENSMUSG00000018340	Anxa6	P14824 "Annexin A6 (Annexin-6)(Annexin VI)(Lipocortin VI)(p68)(p70)(Protein III)(Chromobindin-20)(67 kDa calelectrin)(Calphobindin-II)(CPB-II)"	0.364	52	9	0.2459	23	11	0.367	37	1	0.713077	0.00513545	1.22688	0.483623	0.00981388	1.66349	0.867147			0.616757	0.000290621	1.20058	1.17552	0.00466153	1.10454	1.2095			1.0888	0.361456	1.22471	1.27707	0.01857	1.21425	1.24208			0.556003	0.00146955	1.33075	0.273429	0.000176369	1.64765	0.907782			1.11703
ENSMUSP00000029214	ENSMUSG00000027671	Actl6a	Q9Z2N8 "Actin-like protein 6A (53 kDa BRG1-associated factor A)(Actin-related protein Baf53a)(BRG1-associated factor 53A)(BAF53A)"	0.3427	19	7	0.2844	16	7	0.4079	23	6	0.953523	0.713214	1.35276	1.15023	0.690924	2.27177	1.12821	0.000935263	1.0455	0.830361	0.30738	1.50358	0.978404	0.341689	1.05311	0.960514	0.232251	1.0792	0.900883	0.311711	1.26019	1.06117	0.48517	1.21576	1.10928	0.243747	1.22367	0.830597	0.07988	1.24076	1.06799	0.840789	2.15395	1.07044	0.17997	1.11889	0.901795
ENSMUSP00000112147	ENSMUSG00000020580	Rock2	Q3TR46;Q3UEZ9;Q3UMT5 "Putative uncharacterized protein Fragment ";"Putative uncharacterized protein Fragment ";"Putative uncharacterized protein Fragment "	0.2082	82	5	0.1852	39	8	0.2644	74	4	0.893653	0.243884	1.25684	0.904747	0.166465	1.16569	0.876859	0.00257031	1.04561	1.16471	0.0786125	1.19745	1.10877	0.0178284	1.08252	1.11743	0.136688	1.19116	1.00627	0.921503	1.17987	1.13516	0.00651475	1.08158	0.994298	0.983699	2.27145	1.07629	0.291356	1.18298	0.982954	0.766823	1.14098	1.00753	0.955009	1.47645	1.11632
ENSMUSP00000039420	ENSMUSG00000041303	Gtf3c3	Q3TMP1 "General transcription factor IIIC, polypeptide 3Putative uncharacterized protein ;"	0.1848	38	7	0.0873	13	2	0.1995	30	1	0.906736	0.336172	1.25759	0.849444	0.156994	1.68524	1.1625			0.878432	0.254682	1.28641	0.978367	0.9021	6.00609	1.0331			0.866913	0.21015	1.28283	0.863569	0.266762	2.29361	0.807345			0.808885	0.109325	1.31815	0.898858	0.454998	3.24031	0.968022			0.850125
ENSMUSP00000059562	ENSMUSG00000057335	Cep170	Q6A065 "Centrosomal protein of 170 kDa (Cep170)"	0.1921	64	7	0.06801	21	2				1.31691	0.0278939	1.26306	1.14394	0.167517	1.58454				1.08587	0.319805	1.21146	1.06013	0.387763	1.67795				1.23782	0.175625	1.40504	1.18214	0.127007	1.53705				1.23714	0.153913	1.37599	1.07796	0.063768	1.10061				1.03843
ENSMUSP00000087481	ENSMUSG00000041408	Wapal	B7ZP47 "Wapal protein "	0.1792	48	7	0.17	33	8	0.3216	55	9	0.880448	0.198466	1.24054	0.823446	0.0641532	1.23276	0.904863	0.0635782	1.11308	1.00079	0.993707	1.26385	1.058	0.0573698	1.06046	1.04443	0.131458	1.06149	0.774668	0.0201943	1.22053	0.835607	0.0162741	1.14462	1.0873	0.167852	1.13572	0.995897	0.974413	1.35108	0.974163	0.792911	1.2548	1.03298	0.453276	1.09957	0.921631
ENSMUSP00000027303	ENSMUSG00000026127	Imp4	Q8VHZ7 "U3 small nucleolar ribonucleoprotein protein IMP4 (U3 snoRNP protein IMP4)"	0.4227	26	6	0.3265	15	6	0.3024	21	2	1.00447	0.956003	1.21872	1.04767	0.105765	1.06262	0.969756	0.0679426	1.04269	0.925174	0.424469	1.25865	1.06351	0.289519	1.14303	0.799273	0.279164	3.80018	0.893071	0.61233	1.71321	1.03673	0.271642	1.07798	1.14007	0.444632	4.04894	0.973553	0.684739	1.17358	1.01725	0.498737	1.06219	1.02247	0.75358	1.99869	0.992162
ENSMUSP00000092268	ENSMUSG00000075284	Wipf1	Q8K1I7 "WAS/WASL-interacting protein family member 1 (Wiskott-Aldrich syndrome protein-interacting protein)(WASP-interacting protein)"	0.2657	19	8	0.2657	18	5	0.568	40	3	0.638522	0.0424507	1.5349	0.63617	0.00868272	1.29936	0.769324	0.080169	1.4054	0.751674	0.11339	1.45237	0.853041	0.0719656	1.19909	0.974368	0.706959	1.29404	0.827566	0.287036	1.47471	0.891073	0.105949	1.16634	1.01836	0.919025	1.97689	0.74145	0.125139	1.50118	0.615684	0.0140208	1.381	0.83304	0.116815	1.34336	0.765219
ENSMUSP00000065716	ENSMUSG00000053470	Kdm3a	Q6PCM1 "Lysine-specific demethylase 3A (EC 1.14.11.-)(JmjC domain-containing histone demethylation protein 2A)(Jumonji domain-containing protein 1A)"	0.1905	53	5	0.09751	20	5	0.1655	43	3	0.607678	0.00119706	1.18333	0.666993	0.00252925	1.1816	0.80166	0.0504441	1.24875	0.704062	0.0329633	1.35606	0.977004	0.584856	1.11499	1.01957	0.77115	1.28506	0.650721	0.0017217	1.17328	0.794845	0.00353866	1.10914	0.860359	0.545055	2.44926	0.832979	0.0297852	1.16589	0.892134	0.0565599	1.12665	1.03839	0.862502	2.28374	0.816767
ENSMUSP00000025891	ENSMUSG00000024942	Capn1	O35350 "Calpain-1 catalytic subunit (EC 3.4.22.52)(Calpain-1 large subunit)(Calcium-activated neutral proteinase 1)(CANP 1)(Calpain mu-type)(Micromolar-calpain)(muCANP)"	0.2637	49	8	0.1388	15	6				0.813488	0.0254881	1.18844	0.560397	0.0050733	1.36751				0.708233	0.000793496	1.15604	1.07491	0.787774	1.92302				1.0071	0.944735	1.26212	1.12224	0.121172	1.17231				0.678792	0.0022952	1.20576	0.357806	0.0158333	2.09088				1.06329
ENSMUSP00000097793	ENSMUSG00000039660	D2Wsu81e	Q3UHX9 "Uncharacterized protein C9orf114 homolog "	0.3117	18	8	0.1143	8	2	0.2156	17	1	1.0115	0.94224	1.43354	1.11408	0.633787	8.30647	0.927409			0.970046	0.795489	1.30619	0.981399	0.44876	1.22501	0.960449			1.036	0.794964	1.36319	1.08902	0.601629	4.47941	1.29645			0.962298	0.760781	1.33253	1.03007	0.850924	4.8466	0.954114			1.04345
ENSMUSP00000079228	ENSMUSG00000061479	Snrpa	Q62189 "U1 small nuclear ribonucleoprotein A (U1 snRNP A)(U1-A)(U1A)"	0.4077	28	6	0.4355	23	6	0.561	24	3	1.41926	0.155554	1.74432	0.902078	0.145164	1.16604	0.980993	0.678874	1.18791	1.43405	0.161766	1.79323	1.01423	0.924068	1.43684	1.01003	0.88754	1.30774	1.48796	0.272257	2.56667	0.855234	0.324782	1.44528	1.00525	0.953678	1.41019	1.55732	0.158627	2.03536	0.874791	0.0155476	1.10025	1.03421	0.748241	1.48204	1.64244
ENSMUSP00000118621	ENSMUSG00000026276	Sept2	002 "septin 2 Gene [Source:MGI (curated);Acc:MGI:97298]" "MGI_curated_transcript"	0.4488	30	7	0.3075	15	7	0.4903	25	4	1.23199	0.0249917	1.18762	1.44081	0.102389	1.59037	1.08543	0.0473746	1.08349	0.773717	0.0243841	1.2338	0.977841	0.405887	1.06328	1.0265	0.187534	1.05015	0.826467	0.442359	1.7633	0.993169	0.952984	1.31376	1.15054	0.3766	1.53871	0.847873	0.0358986	1.16176	0.938954	0.689728	1.4445	1.06294	0.37225	1.20395	0.96531
ENSMUSP00000106288	ENSMUSG00000029622	Arpc1b	Q91Z25 "Arpc1b protein "	0.2793	20	5	0.25	14	6	0.2926	22	4	1.02582	0.956185	3.35484	1.00768	0.876099	1.12736	0.922705	0.076662	1.10121	0.873064	0.792362	3.81576	0.611578	0.000113011	1.123	0.891992	0.073344	1.14379	0.763658	0.572309	3.38282	0.841038	0.000148221	1.04415	1.4621	0.0954429	1.65301	0.949715	0.926307	4.28315	1.00593	0.900456	1.12239	1.28903	0.0461387	1.27849	0.778444
ENSMUSP00000082652	ENSMUSG00000032249	Anp32a	O35381;Q64G17 "Acidic leucine-rich nuclear phosphoprotein 32 family member A (Potent heat-stable protein phosphatase 2A inhibitor I1PP2A)(Acidic nuclear phosphoprotein pp32)(Leucine-rich acidic nuclear protein)";"Putative acidic leucine-rich nuclear phosphoprotein 32 family member C "	0.3563	17	4	0.2551	9	3	0.4656	18	5	0.973171	0.79228	1.35087	1.32949	0.150416	1.71255	1.00616	0.923356	1.18117	0.884273	0.104561	1.1851	0.932238	0.915809	12.5143	1.26498	0.211702	1.55174	0.747842	0.0328109	1.27847	0.860373	0.21599	1.43663	0.742829	0.210331	1.73962	1.02784	0.590155	1.15643	1.29769	0.0493878	1.29548	0.997929	0.983866	1.30679	0.929429
ENSMUSP00000021692	ENSMUSG00000021264	Yy1	Q00899 "Transcriptional repressor protein YY1 (Yin and yang 1)(YY-1)(Delta transcription factor)(NF-E1)(UCR-motif DNA-binding protein)"	0.2488	24	6	0.215	12	6	0.2729	22	3	1.01064	0.952289	1.54134	1.13056	0.259711	1.2818	1.08983	0.0109213	1.03977	0.989854	0.921962	1.28985	1.0595	0.436327	1.1921	1.02184	0.165985	1.04445	0.97014	0.933719	2.43857	0.946345	0.815927	1.78222	1.13586	0.515824	2.01465	0.951157	0.833236	1.78681	1.07273	0.437436	1.23863	1.04514	0.721636	1.58969	1.09966
ENSMUSP00000031697	ENSMUSG00000029686	Cul1	Q9WTX6 "Cullin-1 (CUL-1)"	0.2861	57	8	0.2384	26	9	0.3698	42	5	1.04793	0.765095	1.42817	1.04319	0.694334	1.27031	1.02416	0.719093	1.18725	0.95594	0.831451	1.61987	0.955219	0.258191	1.09067	0.953187	0.00883843	1.02829	0.825632	0.4013	1.66064	0.784592	0.00123155	1.12159	1.38726	0.018052	1.26495	0.924236	0.705659	1.60565	0.923073	0.371343	1.2152	1.10451	0.25884	1.2335	0.898308
ENSMUSP00000048457	ENSMUSG00000036160	Surf6	P70279 "Surfeit locus protein 6 "	0.3606	28	7	0.4028	23	5	0.5352	43	3	1.01997	0.898631	1.43931	1.08006	0.0213063	1.05991	1.04729	0.206807	1.11398	0.999845	0.999353	1.66375	1.07612	0.0959178	1.09844	0.882353	0.0418493	1.12051	1.17086	0.374487	1.49541	1.07384	0.0553064	1.07663	0.981597	0.96607	5.28388	0.828706	0.387367	1.63785	0.839115	0.0165322	1.13047	0.843553	0.179731	1.43471	1.26927
ENSMUSP00000084045	ENSMUSG00000024201	Kdm4b	Q91VY5 "Lysine-specific demethylase 4B (EC 1.14.11.-)(JmjC domain-containing histone demethylation protein 3B)(Jumonji domain-containing protein 2B)"	0.1724	41	4							0.982634	0.901649	1.51434							0.900787	0.490932	1.5293							0.757614	0.258874	1.88837							1.13912	0.150271	1.2406							0.963999
ENSMUSP00000036604	ENSMUSG00000035232	Pdk3	Q922H2 "[Pyruvate dehydrogenase [lipoamide]] kinase isozyme 3, mitochondrial Precursor (EC 2.7.11.2)(Pyruvate dehydrogenase kinase isoform 3)"	0.3108	32	6	0.1253	8	3	0.306	22	4	1.55608	0.00473084	1.26499	1.61722	0.0312095	1.45389	1.09364	0.190846	1.18433	1.01353	0.850308	1.18987	1.08343	0.072037	1.10287	1.16764	0.11896	1.25576	1.09597	0.210536	1.18622	0.980644	0.908393	1.90879	0.942435	0.632643	1.42724	1.19532	0.0874813	1.24153	1.02371	0.812899	1.45393	0.986867	0.751612	1.12894	1.10322
ENSMUSP00000019576	ENSMUSG00000005481	Ddx39	Q8VDW0 "ATP-dependent RNA helicase DDX39 (EC 3.6.1.-)(DEAD box protein 39)"	0.534	55	4	0.4778	49	6	0.6792	73	4	0.886362	0.367624	1.56772	0.736002	0.0257353	1.28553	0.891418	0.00778761	1.05898	0.933416	0.616461	1.65669	0.975928	0.51657	1.09397	0.963087	0.555449	1.19826	1.14166	0.496974	1.99891	1.01467	0.788968	1.14183	1.40947	0.340647	2.62855	0.869685	0.284924	1.51484	0.782741	0.0561957	1.28978	1.39151	0.194743	1.88112	0.988567
ENSMUSP00000025506	ENSMUSG00000024604	Rbm22	Q8BHS3 "Pre-mRNA-splicing factor RBM22 (RNA-binding motif protein 22)"	0.3143	23	6	0.2071	10	4	0.3571	24	2	0.881836	0.354065	1.39558	1.05473	0.192371	1.10647	0.984725	0.831382	2.05667	0.898077	0.393161	1.36631	1.04417	0.500365	1.19719	0.957318	0.680888	2.74965	0.98197	0.793736	1.19809	1.06198	0.43824	1.23934	1.12689	0.74163	34.2046	0.882238	0.253377	1.28357	1.03129	0.664573	1.227	0.902976	0.645758	8.04316	0.917985
ENSMUSP00000024739	ENSMUSG00000023944	Hsp90ab1	P11499 "Heat shock protein HSP 90-beta (Heat shock 84 kDa)(HSP 84)(HSP84)(Tumor-specific transplantation 84 kDa antigen)(TSTA)"	0.4309	67	6	0.4751	57	9	0.7141	96	14	1.24998	0.047169	1.24432	1.38416	0.0705217	1.43259	1.30034	2.25137e-06	1.07353	1.19477	0.113387	1.27691	0.932157	0.133218	1.10179	1.07862	0.0142613	1.05952	1.12763	0.291516	1.3161	1.06479	0.17246	1.10144	1.05965	0.714829	1.39807	1.19177	0.105724	1.26347	1.37187	0.0511312	1.37458	1.22768	0.125926	1.31117	1.18623
ENSMUSP00000044305	ENSMUSG00000038446	Cdc40	Q9DC48 "Pre-mRNA-processing factor 17 (PRP17 homolog)(Cell division cycle 40 homolog)"	0.1693	16	6	0.09845	7	3				0.840123	0.160451	1.31248	1.13065	0.330966	1.51445				0.871669	0.386347	1.45095	0.964743	0.158421	1.07261				0.960817	0.721124	1.31265	0.994898	0.902639	1.17245				0.917542	0.4818	1.33818	1.03969	0.773878	1.66557				0.869981
ENSMUSP00000112950	ENSMUSG00000022724	Mina	Q8CCK9 "Putative uncharacterized protein "	0.3054	35	8	0.2581	19	6	0.4065	28	3	1.26796	0.0206381	1.20766	1.24841	0.0751643	1.28994	1.21751	0.116473	1.37362	1.27923	0.0129321	1.19235	1.53908	0.00102481	1.17616	1.19254	0.111709	1.31918	1.40796	0.154641	1.66058	1.36771	0.00142655	1.13509	1.46181	0.157751	2.09471	1.44244	0.00213474	1.20106	1.29629	0.038766	1.27092	1.25643	0.365079	2.32831	1.85658
ENSMUSP00000001416	ENSMUSG00000001380	Hars	Q61035 "Histidyl-tRNA synthetase, cytoplasmic (EC 6.1.1.21)(Histidine--tRNA ligase)(HisRS)"	0.2456	28	7	0.1532	11	6	0.4047	38	7	0.831107	0.0759448	1.23534	0.815505	0.205779	1.43434	0.938447	0.0245325	1.05349	1.01308	0.934027	1.44537	0.792335	0.043409	1.24938	1.0687	0.0241214	1.05576	0.652496	0.0225313	1.40084	0.610981	0.00496665	1.30337	1.04771	0.746585	1.40073	0.754085	0.153735	1.52672	0.849967	0.120329	1.25036	0.937262	0.511924	1.25544	0.679204
ENSMUSP00000064282	ENSMUSG00000054428	Atpif1	O35143 "ATPase inhibitor, mitochondrial Precursor (Inhibitor of F(1)F(o)-ATPase)(IF(1))(IF1)"	0.5	12	3	0.4057	10	3				1.05481	0.945588	19.6814	0.827455	0.687938	5.78042				1.13159	0.904906	51.3032	0.964419	0.587116	1.27528				0.980212	0.982924	35.1866	0.846889	0.0734162	1.22782				1.03682	0.972709	56.24	0.73144	0.405362	3.62042				1.31645
ENSMUSP00000110439	ENSMUSG00000026727	Rsu1	A2AUR7;Q9CSE4;Q9CUS2 "Ras suppressor protein 1Ras suppressor protein 1, isoform CRA_a ;";"Putative uncharacterized protein Fragment ";"Putative uncharacterized protein Fragment "	0.3192	23	6	0.3502	13	5	0.7148	23	8	1.3863	0.440927	2.72848	1.26285	0.182618	1.49527	1.33518	0.00128648	1.1412	1.1861	0.682224	2.74703	0.953762	0.512919	1.20111	0.980081	0.718204	1.13499	1.06354	0.868469	2.48109	0.967248	0.729691	1.28326	1.20005	0.341123	1.52549	1.06435	0.880773	2.76207	0.909365	0.263792	1.22513	0.881373	0.130741	1.19065	1.07729
ENSMUSP00000019065	ENSMUSG00000018921	Pelp1	Q9DBD5 "Proline-, glutamic acid- and leucine-rich protein 1 (Modulator of non-genomic activity of estrogen receptor)"	0.2048	34	6	0.1184	22	6	0.4123	59	8	0.719795	0.00844916	1.22266	0.704744	0.0473171	1.41041	0.990579	0.841938	1.11424	0.810614	0.00615129	1.12617	1.03797	0.266091	1.07957	0.911418	0.0868288	1.11651	0.900065	0.058339	1.11711	0.988917	0.955879	1.63675	1.09234	0.64305	1.53947	0.755968	0.0325495	1.278	0.845021	0.190653	1.33125	1.01821	0.808544	1.18486	0.790417
ENSMUSP00000088922	ENSMUSG00000069117	AC122881.1	AC122881.1 AC122881.1-201 "null" "Clone_based_ensembl_transcript"	0.6382	29	5	0.4671	12	5	0.8289	32	5	1.24368	0.0180081	1.16937	1.19078	0.106131	1.26255	1.05862	0.276721	1.13393	1.0456	0.562159	1.21664	1.05825	0.114563	1.08125	1.13113	0.00345767	1.05679	1.15058	0.717639	2.72659	1.1534	0.466349	1.63658	1.26452	0.512957	2.48069	1.09157	0.23725	1.19142	1.19947	0.0476193	1.19575	1.45351	0.0085147	1.24027	1.12992
ENSMUSP00000032998	ENSMUSG00000030744	Rps3	P62908 "40S ribosomal protein S3 "	0.4815	24	5	0.6831	24	13	0.8601	36	10	1.21223	0.145255	1.34428	1.30272	0.0717707	1.33886	1.07491	0.00615038	1.04701	1.0034	0.947076	1.14245	1.0938	0.0309811	1.08325	1.07098	0.146973	1.10267	1.20713	0.0523447	1.21081	1.35908	2.94039e-05	1.10834	1.55776	0.00172771	1.25611	1.03139	0.63997	1.18508	1.19718	0.11593	1.26039	1.54685	0.00023968	1.18327	1.14015
ENSMUSP00000023433	ENSMUSG00000022752	Tomm70a	Q9CZW5 "Mitochondrial import receptor subunit TOM70 (Translocase of outer membrane 70 kDa subunit)(Mitochondrial precursor proteins import receptor)"	0.2602	38	6	0.09656	10	5				1.23021	0.000368339	1.06459	1.40526	0.00306923	1.15914				1.13448	0.0420736	1.12696	1.2119	0.000286719	1.0459				1.63651	9.64862e-06	1.07278	1.63355	0.000179251	1.10699				1.29776	0.0010463	1.10354	1.42998	0.00145554	1.13569				1.27202
ENSMUSP00000032898	ENSMUSG00000030662	Ipo5	Q8BKC5 "Importin-5 (Imp5)(Importin subunit beta-3)(Karyopherin beta-3)(Ran-binding protein 5)(RanBP5)"	0.2078	60	8	0.06016	12	3	0.3428	49	9	0.904757	0.305627	1.23886	1.11761	0.657227	2.52751	0.996783	0.942098	1.10423	1.08558	0.451128	1.27554	0.939953	0.322296	1.22684	1.14136	0.00105811	1.06293	0.884824	0.177069	1.21266	0.768789	0.294177	2.23211	0.895971	0.184003	1.1903	1.12292	0.290074	1.27073	1.36109	0.222466	2.13537	1.13596	0.124785	1.18704	0.944741
ENSMUSP00000048285	ENSMUSG00000036112	Metap2	O08663 "Methionine aminopeptidase 2 (MetAP 2)(MAP 2)(EC 3.4.11.18)(Peptidase M 2)(Initiation factor 2-associated 67 kDa glycoprotein)(p67eIF2)(p67)"	0.2469	22	7	0.09205	5	4	0.3703	26	6	1.13689	0.184715	1.23311	1.09189	0.746131	2.19935	1.09729	0.087234	1.11904	1.0021	0.987356	1.36379	0.965631	0.231943	1.07731	1.02166	0.648164	1.12029	0.889082	0.333148	1.31438	0.926221	0.273844	1.20026	0.586599	0.272899	3.04536	1.01447	0.902675	1.31743	0.988627	0.965985	2.19505	0.853259	0.55161	1.89573	1.11254
ENSMUSP00000109879	ENSMUSG00000024335	Brd2	Q7JJ13 "Bromodomain-containing protein 2 (Protein RING3)(Female sterile homeotic-related protein 1)(Fsrg-1)"	0.2581	38	7	0.1767	28	4	0.2982	43	5	1.08115	0.567869	1.37167	1.03606	0.854919	1.76154	1.11555	0.132145	1.17448	0.962816	0.752876	1.32484	0.989177	0.682534	1.07978	0.99792	0.967749	1.14378	1.03239	0.776713	1.30072	0.941591	0.815044	2.11771	1.2028	0.210165	1.4102	1.08393	0.447171	1.27446	0.984591	0.896734	1.41935	1.05	0.46389	1.18225	1.13447
ENSMUSP00000016763	ENSMUSG00000016619	Nup50	Q9JIH2 "Nuclear pore complex protein Nup50 (Nucleoporin Nup50)(50 kDa nucleoporin)(Nuclear pore-associated protein 60 kDa-like)"	0.2682	26	6	0.4034	28	9	0.4142	35	6	0.884609	0.408628	1.41858	1.14441	0.305787	1.32885	0.84379	0.0215257	1.14158	0.883277	0.396308	1.41073	0.99675	0.899773	1.05944	0.896034	0.200143	1.21083	0.925013	0.618358	1.45883	1.03718	0.344115	1.08732	0.6459	0.0855244	1.6915	0.899497	0.47768	1.4262	1.14766	0.257035	1.29722	0.760084	0.0129382	1.20535	0.979354
ENSMUSP00000032949	ENSMUSG00000030707	Coro1a	O89053 "Coronin-1A (Coronin-like protein p57)(Coronin-like protein A)(Clipin-A)(Tryptophan aspartate-containing coat protein)(TACO)"	0.3341	32	7	0.3644	22	14	0.5401	31	11	1.16656	0.391783	1.50471	1.53227	0.00274725	1.28421	0.33452	5.96891e-09	1.14509	1.22861	0.272147	1.51697	1.01062	0.641605	1.04906	0.974351	0.429166	1.07279	1.44453	0.0765309	1.52387	1.33144	2.88204e-07	1.06653	0.625438	0.163113	2.00277	2.00207	0.0118065	1.60966	1.55221	0.000236527	1.20848	1.15848	0.498342	1.5944	1.55187
ENSMUSP00000022816	ENSMUSG00000022205	Sub1	P11031 "Activated RNA polymerase II transcriptional coactivator p15 (SUB1 homolog)(Positive cofactor 4)(PC4)(p14)(Single-stranded DNA-binding protein p9)"	0.5906	14	8	0.4646	8	3	0.5591	14	2	1.01982	0.973783	4.06227	0.987593	0.814981	1.22355	1.294	0.0317086	1.17732	0.753728	0.678849	4.9077	1.10959	0.247313	1.31886	1.16088	0.10318	1.36331	1.20896	0.787484	5.19223	1.11475	0.156474	1.23423	1.07461	0.542771	2.84687	1.02586	0.970173	4.96691	0.948719	0.409658	1.24483	0.992689	0.842432	1.44626	0.86627
ENSMUSP00000003572	ENSMUSG00000029777	Gars	Q9CZD3 "Glycyl-tRNA synthetase (EC 6.1.1.14)(Glycine--tRNA ligase)(GlyRS)(Diadenosine tetraphosphate synthetase)(AP-4-A synthetase)"	0.3045	39	5	0.1399	11	1	0.3251	41	4	0.880816	0.218506	1.27326	0.996018			0.825568	0.0303438	1.17028	1.30595	0.198332	1.61781	0.991653			1.1237	0.130008	1.19617	0.910363	0.270716	1.2265	0.946535			0.741105	0.0211113	1.23891	0.967395	0.803682	1.41407	1.19113			0.951759	0.264461	1.12178	0.984067
ENSMUSP00000109990	ENSMUSG00000024308	Tapbp	Q9R233 "Tapasin Precursor (TPSN)(TPN)(TAP-binding protein)(TAP-associated protein)"	0.2639	24	7	0.1502	9	3	0.2798	16	3	1.38511	0.0270886	1.31553	1.33639	0.128056	1.64118	1.74636	0.0273061	1.49896	2.00495	0.00319455	1.43216	1.61717	0.221535	3.25203	2.22502	0.0298785	1.83783	1.25952	0.335083	1.714	1.53097	0.0203583	1.189	2.52846	0.138301	5.26989	1.9767	0.00428702	1.45345	2.47376	0.0119596	1.53739	3.38672	0.0157234	1.94659	1.18362
ENSMUSP00000087620	ENSMUSG00000005899	Smpd4	Q6ZPR5 "Sphingomyelin phosphodiesterase 4 (EC 3.1.4.12)(Neutral sphingomyelinase 3)(nSMase-3)(nSMase3)(Neutral sphingomyelinase III)"	0.2677	44	7	0.1636	22	6	0.3098	44	4	1.03838	0.308777	1.08643	0.865483	0.0978779	1.20057	0.9269	0.123576	1.12037	1.0268	0.332691	1.06336	1.0163	0.589247	1.07477	0.9389	0.0683937	1.07454	1.03842	0.373805	1.10078	0.972872	0.450586	1.09029	1.09017	0.69104	1.87253	1.09601	0.132118	1.13743	0.985566	0.635755	1.07701	0.938804	0.440802	1.25452	1.11537
ENSMUSP00000033176	ENSMUSG00000030884	Uqcrc2	Q9DB77 "Cytochrome b-c1 complex subunit 2, mitochondrial Precursor (Ubiquinol-cytochrome-c reductase complex core protein 2)(Core protein II)(Complex III subunit 2)"	0.2892	24	6	0.3201	18	9	0.4459	23	2	1.32567	0.0522468	1.33107	1.31012	0.00120524	1.13578	0.891082	0.301241	2.11737	1.21393	0.203385	1.40598	1.38637	0.000143988	1.11794	1.30667	0.0255893	1.14646	1.63973	0.0132485	1.40319	1.85305	1.66262e-06	1.12148	1.24252	0.192785	2.36794	1.29526	0.0524397	1.30051	1.38902	7.47297e-05	1.10752	1.50262	0.0184681	1.16199	1.35976
ENSMUSP00000006856	ENSMUSG00000006678	Pola1	P33609 "DNA polymerase alpha catalytic subunit (EC 2.7.7.7)(DNA polymerase alpha catalytic subunit p180)"	0.2143	71	7	0.06007	17	2				1.10688	0.438975	1.34963	0.920511	0.0332525	1.05656				1.2069	0.300755	1.50146	0.912339	0.493205	3.13011				0.948658	0.848751	1.91123	0.85542	0.140934	1.56296				1.26609	0.24703	1.56864	1.06631	0.0274476	1.03582				1.08256
ENSMUSP00000039247	ENSMUSG00000009681	Bcr	Q6PAJ1 "Breakpoint cluster region protein (EC 2.7.11.1)"	0.1843	56	6	0.05354	11	3	0.2614	63	3	4.86303	0.0401829	4.33423	7.34904	0.0234636	3.81272	11.4245	0.00684788	2.39124	0.892184	0.534667	1.59479	0.953477	0.395348	1.21039	1.06142	0.52109	1.39439	0.920144	0.528069	1.39762	1.03719	0.82092	1.84113	7.24814	0.00609284	1.95101	0.919463	0.25349	1.19113	0.835174	0.0302518	1.14792	0.874128	0.543703	2.2216	0.83811
ENSMUSP00000018841	ENSMUSG00000018697	Aatf	Q9JKX4 "Protein AATF (Apoptosis-antagonizing transcription factor)(Rb-binding protein Che-1)(Traube protein)"	0.2928	29	5	0.1673	8	4	0.2548	26	1	0.955292	0.45029	1.16406	0.921062	0.71564	1.92206	0.91915			0.993453	0.967633	1.52554	1.02793	0.601769	1.1627	0.899447			0.909627	0.366657	1.29505	0.836136	0.347675	1.66972	1.15885			0.998612	0.983929	1.19713	1.03191	0.852951	1.64081	1.02857			1.06911
ENSMUSP00000082858	ENSMUSG00000066626	AC122447.1	AC122447.1 AC122447.1-201 "null" "Clone_based_ensembl_transcript"	0.5673	27	8	0.4087	18	6	0.5727	29	6	0.96323	0.773298	1.3555	1.23759	0.235614	1.50182	1.01776	0.587625	1.08129	0.836226	0.0685458	1.21832	1.00388	0.931034	1.11573	0.997125	0.936255	1.09203	0.932613	0.538059	1.29888	1.18736	0.00613443	1.102	1.78252	0.0141676	1.49616	0.891791	0.261089	1.25346	1.1816	0.212974	1.35078	1.6217	0.0397409	1.56838	0.89182
ENSMUSP00000066393	ENSMUSG00000024097	Sfrs7	Q8BL97 "Splicing factor, arginine/serine-rich 7 "	0.5714	36	8							1.04516	0.919974	2.72646							1.01174	0.980585	2.98729							1.21854	0.668652	2.84822							1.13877	0.764492	2.68207							1.02839
ENSMUSP00000033088	ENSMUSG00000030816	Rnf40	Q3U319 "E3 ubiquitin-protein ligase BRE1B (BRE1-B)(EC 6.3.2.-)(RING finger protein 40)"	0.2198	51	6	0.1528	25	5	0.3986	60	3	0.858617	0.0936022	1.20877	0.946958	0.354594	1.15562	0.959828	0.0607114	1.04663	0.85413	0.0738139	1.19694	1.00171	0.956701	1.08548	0.940666	0.0952489	1.09157	0.822177	0.0879361	1.26857	0.948917	0.0733581	1.06219	1.06158	0.595098	1.50772	0.815869	0.0265434	1.1832	0.931716	0.190023	1.13262	0.957971	0.595586	1.34373	0.870844
ENSMUSP00000105990	ENSMUSG00000022285	Ywhaz	P63101 "14-3-3 protein zeta/delta (Protein kinase C inhibitor protein 1)(KCIP-1)(SEZ-2)"	0.351	26	3	0.5429	19	6	0.7388	41	5	0.927206	0.555934	1.59043	0.89237	0.253663	1.25489	0.984068	0.835403	1.22274	0.991059	0.887549	1.27311	0.929555	0.0145625	1.05262	1.21643	0.0182513	1.15159	1.02599	0.453726	1.12718	0.976725	0.537104	1.09574	1.66392	0.0683387	1.76889	0.912988	0.26962	1.29567	0.982059	0.871831	1.31539	1.33258	0.129049	1.51852	0.967698
ENSMUSP00000002790	ENSMUSG00000002718	Cse1l	Q9ERK4 "Exportin-2 (Exp2)(Importin-alpha re-exporter)(Chromosome segregation 1-like protein)"	0.2142	57	5	0.1071	18	5	0.2214	39	3	0.853291	0.351448	1.51887	1.11145	0.518095	1.51344	1.18112	0.197507	1.45731	1.00336	0.979546	1.40738	1.01411	0.807892	1.16152	0.913266	0.511691	1.63779	0.954452	0.756612	1.47681	1.15087	0.119567	1.21843	0.638682	0.491918	10.1005	0.840261	0.278839	1.47101	1.10899	0.511093	1.48971	1.03542	0.744981	1.49421	0.927076
ENSMUSP00000106278	ENSMUSG00000043909	Trp53bp1	P70399 "Tumor suppressor p53-binding protein 1 (p53-binding protein 1)(p53BP1)(53BP1)"	0.1437	47	7	0.1077	30	7	0.2423	74	7	0.940077	0.380148	1.1731	0.926889	0.0345687	1.07065	1.05811	0.0827511	1.06871	0.950687	0.580399	1.23595	1.19535	0.14442	1.29728	1.12432	0.482571	1.46694	1.22015	0.0923287	1.27551	1.18794	0.0175378	1.1386	1.01045	0.944229	1.41745	1.0375	0.655916	1.212	0.991748	0.830208	1.09475	0.952101	0.551205	1.20961	0.979816
ENSMUSP00000111502	ENSMUSG00000022710	Usp7	Q6A4J8 "Ubiquitin carboxyl-terminal hydrolase 7 (EC 3.1.2.15)(Ubiquitin thioesterase 7)(Ubiquitin-specific-processing protease 7)(Deubiquitinating enzyme 7)(Herpesvirus-associated ubiquitin-specific protease)(mHAUSP)"	0.21	58	7	0.1286	23	7	0.3291	49	5	1.11484	0.591777	1.59969	1.04415	0.690852	1.28818	0.952215	0.0442843	1.04805	1.14334	0.537085	1.65012	1.04929	0.184977	1.0818	1.11329	0.0677619	1.1273	1.04336	0.85358	1.71439	1.03656	0.338071	1.0881	1.28992	0.170526	1.52737	1.099	0.656496	1.63868	1.26241	0.0174903	1.19185	1.14977	0.195907	1.2838	1.08848
ENSMUSP00000020268	ENSMUSG00000020074	Ccar1	Q8CH18 "Cell division cycle and apoptosis regulator protein 1 (Cell cycle and apoptosis regulatory protein 1)(CARP-1)"	0.1867	61	7	0.185	30	8	0.3394	65	8	0.876561	0.125564	1.19869	0.833498	0.0434082	1.19128	0.914433	0.0527216	1.0951	0.930363	0.413558	1.22274	1.05767	0.171233	1.09088	1.02978	0.640996	1.15307	0.997344	0.967839	1.16744	0.975831	0.396103	1.06611	0.98573	0.95553	1.80072	0.912477	0.198447	1.16772	0.886957	0.0790016	1.14807	0.849613	0.179074	1.29455	0.998069
ENSMUSP00000057984	ENSMUSG00000046791	2410016O06Rik	Q9JJF3 "Lysine-specific demethylase NO66 (EC 1.14.11.27)(Nucleolar protein 66)"	0.2471	27	4	0.2172	18	5	0.3748	36	2	1.0793	0.266265	1.19506	1.08076	0.21765	1.15894	1.07884	0.241381	1.46839	1.29685	0.0153844	1.17986	1.29919	0.0772417	1.35966	1.15907	0.57221	10.5682	0.993003	0.949233	1.38153	0.860714	0.126483	1.24142	0.716765	0.123922	2.30294	1.18555	0.154367	1.33081	1.04167	0.347138	1.11235	1.04996	0.6777	3.05643	1.27376
ENSMUSP00000027736	ENSMUSG00000026464	Zc3h11a	Q6NZF1 "Zinc finger CCCH domain-containing protein 11A "	0.2235	33	6	0.303	28	11	0.4268	60	10	1.10935	0.0227134	1.08558	1.05317	0.0497097	1.05308	1.01012	0.770753	1.07876	0.920673	0.0336862	1.07595	0.922979	0.0248825	1.07008	0.908914	0.117416	1.13289	1.11264	0.159579	1.18078	1.00677	0.757562	1.0485	0.88239	0.564576	1.60525	1.21285	0.0406846	1.19833	1.00714	0.793659	1.0608	0.971904	0.570717	1.11578	1.05968
ENSMUSP00000101616	ENSMUSG00000074088	Snrnp40	Q6PE01 "U5 small nuclear ribonucleoprotein 40 kDa protein (U5 snRNP 40 kDa protein)(WD repeat-containing protein 57)"	0.3464	26	5	0.1983	10	4	0.3436	14	4	1.11197	0.407988	1.37578	0.90365	0.565656	1.65021	1.00295	0.843977	1.04469	1.05147	0.647592	1.32625	1.0337	0.569957	1.18033	1.02774	0.786787	1.34244	1.09336	0.316691	1.24198	0.98014	0.80127	1.26142	0.963056	0.959301	8.68883	1.02569	0.837488	1.3796	0.970559	0.828544	1.49588	0.934649	0.712895	1.70153	1.05715
ENSMUSP00000003529	ENSMUSG00000003437	Paf1	Q8K2T8 "RNA polymerase II-associated factor 1 homolog "	0.2374	24	7	0.1682	11	4	0.314	28	1	1.06572	0.540896	1.27165	1.02591	0.769562	1.289	1.00013			0.977666	0.876012	1.40422	1.047	0.396944	1.15981	0.95894			1.20626	0.151512	1.32221	1.12514	0.00166889	1.03514	1.11156			1.11395	0.398775	1.33743	0.977167	0.742619	1.22641	1.06183			1.0495
ENSMUSP00000070714	ENSMUSG00000035152	Ap2b1	Q9DBG3 "AP-2 complex subunit beta (Adapter-related protein complex 2 beta subunit)(Adaptor protein complex AP-2 subunit beta)(Beta-2-adaptin)(Beta-adaptin)(Plasma membrane adaptor HA2/AP2 adaptin beta subunit)(Clathrin assembly protein complex 2 beta large /.../(AP105B)"	0.1932	38	2	0.1654	25	4	0.2679	42	2	0.546486	0.457649	827.522	1.43865	0.00169173	1.11296	1.06059	0.536389	2.3122	0.528639	0.26769	37.4019	1.11459	0.106969	1.16349	1.2774	0.253025	3.69085	0.586079	0.498525	860.431	1.3225	0.00395814	1.11634	1.01711	0.697804	1.52131	0.612254	0.525357	855.019	1.07513	0.44853	1.30354	0.940906	0.538549	2.39613	0.545935
ENSMUSP00000022060	ENSMUSG00000021576	Pdcd6	P12815 "Programmed cell death protein 6 (Probable calcium-binding protein ALG-2)(PMP41)(ALG-257)"	0.5497	18	7	0.3194	9	4	0.4503	14	2	1.05743	0.341772	1.14154	0.995163	0.887944	1.10592	1.47255	0.0735923	1.76997	0.807517	0.0795631	1.28164	0.939165	0.224396	1.13981	0.931337	0.765258	10.3716	0.917767	0.361475	1.24576	0.881723	0.194765	1.27221	1.15772	0.546158	8.60496	0.958058	0.701907	1.29834	0.846809	0.0684843	1.20891	1.03573	0.8733	9.12942	0.882992
ENSMUSP00000059289	ENSMUSG00000051329	Nup160	Q9Z0W3 "Nuclear pore complex protein Nup160 (Nucleoporin Nup160)(160 kDa nucleoporin)(Gene trap locus 1-13 protein)(GTL-13)"	0.1619	50	6	0.1327	29	8	0.3602	82	13	1.01442	0.76899	1.12604	0.946723	0.623681	1.28705	1.1084	0.00142897	1.05599	0.870598	0.00256421	1.06603	0.957049	0.266918	1.08989	0.880606	0.0931333	1.16403	0.936136	0.201062	1.12219	1.00786	0.887884	1.13499	1.01709	0.941249	1.63335	0.930644	0.140627	1.11142	0.929575	0.323311	1.17652	0.871535	0.26959	1.29543	0.959636
ENSMUSP00000094955	ENSMUSG00000013787	Ehmt2	A2CG76;Q3U4G9;Q8BP38 "Euchromatic histone lysine N-methyltransferase 2 ";"Putative uncharacterized protein ";"Putative uncharacterized protein Fragment "	0.1862	52	7	0.1969	33	6	0.2677	67	3	1.064	0.527709	1.25422	1.03721	0.662251	1.22449	0.983065	0.746285	1.21912	1.10919	0.335207	1.2739	1.10073	0.0263675	1.0824	0.907636	0.317917	1.37182	1.04855	0.705685	1.3402	0.983286	0.458932	1.05552	0.943631	0.886565	4.69379	1.0343	0.789228	1.34342	0.967411	0.586931	1.15813	0.963047	0.912024	3.65906	1.02326
ENSMUSP00000102968	ENSMUSG00000001017	2500003M10Rik	Q9CY57 "Uncharacterized protein C1orf77 homolog "	0.5542	39	5	0.6787	25	6	0.8514	63	6	1.18342	0.403547	1.65033	0.986586	0.934562	1.49517	0.974187	0.62661	1.13862	1.06271	0.805413	1.89947	1.02494	0.407561	1.0726	0.973546	0.296072	1.06088	1.33064	0.224165	1.73666	1.059	0.369478	1.16125	0.905218	0.700144	1.87286	1.35546	0.219699	1.78744	1.05294	0.763864	1.51896	1.03856	0.768491	1.3675	1.28279
ENSMUSP00000029480	ENSMUSG00000027881	Prpf38b	Q80SY5 "Pre-mRNA-splicing factor 38B "	0.286	28	7	0.2786	26	5	0.6033	60	4	0.648668	0.0646532	1.59823	0.703522	0.0699275	1.48786	0.877982	0.0329697	1.11653	0.7523	0.0785338	1.38941	0.939349	0.0626807	1.07022	0.952424	0.526135	1.24219	0.837926	0.366737	1.55786	0.947133	0.252015	1.11932	0.371403	0.0225221	2.06584	0.849749	0.381182	1.52445	0.934086	0.47641	1.27274	0.754028	0.353475	2.27109	0.750685
ENSMUSP00000122103	ENSMUSG00000027010	Slc25a12	Q8BH59 "Calcium-binding mitochondrial carrier protein Aralar1 (Mitochondrial aspartate glutamate carrier 1)(Solute carrier family 25 member 12)"	0.2541	33	5	0.2334	17	5	0.384	43	5	1.13376	0.161298	1.22518	1.15795	0.501132	1.73527	0.843956	0.000957658	1.05557	0.953103	0.646599	1.30918	1.07062	0.294593	1.17022	0.966239	0.156379	1.05624	1.11421	0.636289	1.79953	1.33722	0.0431794	1.31801	1.17524	0.675381	2.70194	0.896996	0.2921	1.28263	1.05805	0.632103	1.35352	0.996403	0.982354	1.52974	0.986749
ENSMUSP00000072092	ENSMUSG00000019961	Tmpo	Q61029 "Lamina-associated polypeptide 2, isoforms beta/delta/epsilon/gamma (Thymopoietin isoforms beta/delta/epsilon/gamma)(TP beta/delta/epsilon/gamma)"	0.5655	54	5	0.5898	51	7	0.677	77	5	0.966745	0.752508	1.32041	0.929171	0.760165	1.75523	1.00351	0.868787	1.05671	0.948348	0.854525	2.12342	0.935323	0.423243	1.20978	0.953472	0.0472154	1.0478	0.858159	0.108602	1.22907	0.85092	0.0804905	1.20698	0.89789	0.513189	1.5177	1.13287	0.202463	1.25534	0.984384	0.938014	1.60801	0.900957	0.0479257	1.10821	1.02315
ENSMUSP00000001712	ENSMUSG00000020196	Cabin1	B9EKC5;Q3TC43;Q3TDW4;Q3TGB0;Q6PH97;Q80X22;Q8BIF4;Q8CGG3 "Calcineurin binding protein 1 ";"Putative uncharacterized protein Fragment ";"Putative uncharacterized proteinCalcineurin binding protein 1, isoform CRA_c ;";"Putative uncharacterized protein Fragment ";"Cabin1 protein Fragment ";"Cabin1 protein Fragment ";"Putative uncharacterized protein ";"Similar to cain Fragment "	0.1591	86	6	0.07865	24	6				0.916836	0.335577	1.23319	0.921746	0.357872	1.22994				1.015	0.81797	1.17097	1.16941	0.0175214	1.1223				0.990929	0.890594	1.17575	0.943093	0.526219	1.24764				0.987865	0.89111	1.24354	1.02782	0.663585	1.16502				0.976232
ENSMUSP00000024802	ENSMUSG00000024007	Ppil1	Q9D0W5 "Peptidyl-prolyl cis-trans isomerase-like 1 (PPIase)(EC 5.2.1.8)(Rotamase PPIL1)"	0.5181	18	7	0.3735	10	5	0.5301	11	2	1.02037	0.884554	1.38509	0.810954	0.168344	1.41388	0.981818	0.704927	1.59436	1.08552	0.529184	1.35085	1.01889	0.428657	1.06084	0.987323	0.794521	1.62361	1.07599	0.610162	1.3956	0.884915	0.109624	1.18001	1.27896	0.523293	28.8993	1.01352	0.930943	1.43856	0.922039	0.156682	1.13818	1.13033	0.296496	2.18669	1.11331
ENSMUSP00000068103	ENSMUSG00000054079	Utp18	Q5SSI6 "U3 small nucleolar RNA-associated protein 18 homolog (WD repeat-containing protein 50)"	0.3134	32	6	0.2428	19	5	0.3822	36	3	1.03957	0.410914	1.11767	0.900724	0.399336	1.36068	0.911187	0.0627729	1.11104	0.925358	0.247658	1.16467	1.04859	0.115265	1.06784	0.839248	0.113874	1.32164	0.982958	0.794367	1.17438	1.0779	0.290444	1.18661	1.34936	0.213216	2.04463	1.04908	0.476559	1.17369	0.97709	0.720844	1.18264	1.02386	0.743943	1.31109	1.1461
ENSMUSP00000000940	ENSMUSG00000000916	Nsun5	Q8K4F6 "Putative methyltransferase NSUN5 (EC 2.1.1.-)(NOL1/NOP2/Sun domain family member 5)(Williams-Beuren syndrome chromosomal region 20A protein homolog)"	0.3118	27	7	0.1226	11	3	0.3591	39	4	0.976457	0.573457	1.10291	1.09558	0.545095	1.72242	1.1547	0.0683213	1.17815	0.964449	0.543616	1.14754	1.29049	0.0610984	1.32903	0.987644	0.770479	1.13193	0.949022	0.506856	1.19894	1.14152	0.218399	1.37909	1.04212	0.680468	1.33506	0.962909	0.564544	1.16386	1.49802	0.245728	2.9165	1.08197	0.0343207	1.07014	0.996934
ENSMUSP00000109495	ENSMUSG00000057421	Las1l	A2BE28 "Protein LAS1 homolog "	0.2113	31	7	0.1572	17	6	0.3389	37	3	0.825719	0.0577028	1.22153	0.829977	0.132685	1.30602	0.990768	0.870899	1.24204	1.0018	0.973069	1.1333	0.958122	0.271113	1.09301	1.00544	0.869581	1.13385	0.944243	0.65491	1.34805	0.964322	0.561186	1.16202	0.98152	0.885865	1.63887	0.942024	0.523747	1.24102	0.812164	0.0848516	1.28332	0.976902	0.803353	1.42549	0.877417
ENSMUSP00000038958	ENSMUSG00000034820	Cpsf7	Q8BTV2 "Cleavage and polyadenylation specificity factor subunit 7 "	0.3036	26	7	0.3333	20	9	0.3376	29	4	0.763614	0.0603855	1.33091	0.737174	0.000363986	1.1267	0.778236	0.122978	1.45427	0.775976	0.0646018	1.31613	0.835306	1.79891e-05	1.04699	0.806345	0.0530695	1.24676	0.999408	0.997178	1.48359	0.961322	0.265432	1.07893	0.805136	0.200593	1.52479	0.881781	0.278711	1.29503	0.843232	0.000357269	1.06878	0.899976	0.250238	1.26601	0.969891
ENSMUSP00000043315	ENSMUSG00000042729	Wdr74	Q8VCG3 "WD repeat-containing protein 74 "	0.3203	19	7	0.3021	14	6	0.3594	30	6	0.899279	0.20991	1.20325	0.822015	0.0235265	1.16953	0.930082	0.1354	1.11044	0.952945	0.733525	1.39186	1.04746	0.119657	1.06565	0.792319	0.00171272	1.10307	1.06519	0.685246	1.43779	0.937955	0.130605	1.09543	1.32801	0.249855	1.75142	1.12247	0.28369	1.27144	0.913344	0.120073	1.13255	1.28778	0.104462	1.38856	1.13729
ENSMUSP00000031288	ENSMUSG00000029345	Tfip11	Q9ERA6 "Tuftelin-interacting protein 11 (Septin and tuftelin-interacting protein 1)(STIP-1)(Tuftelin-interacting protein 39)"	0.2422	44	6	0.1193	15	4	0.3604	48	5	1.06985	0.584295	1.34583	0.993286	0.971234	1.72909	0.964995	0.0192371	1.02643	1.00448	0.975531	1.42887	1.09845	0.236724	1.22459	1.00038	0.991067	1.09249	1.05164	0.761465	1.49741	1.04782	0.637046	1.3286	0.908295	0.784742	2.49466	0.963417	0.834152	1.54407	0.992135	0.930402	1.30322	0.836811	0.406691	1.70554	1.02104
ENSMUSP00000114557	ENSMUSG00000054766	Set	A2BE92;A2BE93;Q9CRT3 "SET translocation Fragment ";"SET translocation Fragment ";"Putative uncharacterized protein Fragment "	0.4837	22	6	0.1869	13	4	0.5121	26	2	0.867015	0.488835	1.68248	0.99853	0.989134	1.37242	0.790927	0.168405	2.24177	0.794329	0.230542	1.54307	0.870394	0.601593	2.13679	0.78777	0.369126	7.27941	0.97458	0.945872	2.52841	1.05831	0.346497	1.17573	1.01974	0.90073	4.85528	0.875155	0.557581	1.78485	1.07794	0.0343545	1.06673	0.872495	0.639816	15.3199	0.911372
ENSMUSP00000082531	ENSMUSG00000002963	Pnkp	Q9JLV6 "Bifunctional polynucleotide phosphatase/kinase (Polynucleotide kinase-3'-phosphatase)(DNA 5'-kinase/3'-phosphatase) [Includes Polynucleotide 3'-phosphatase(EC 3.1.3.32)(2'(3')-polynucleotidase);Polynucleotide 5'-hydroxyl-kinase(EC 2.7.1.78)]"	0.3563	30	7	0.1705	12	4	0.4464	32	7	1.007	0.904522	1.14627	0.937772	0.230439	1.14595	1.15081	0.0782718	1.176	0.967573	0.605229	1.15943	1.10675	0.0111035	1.05904	1.10963	0.104879	1.14265	0.953165	0.192189	1.08317	1.02924	0.576473	1.15811	0.909917	0.803052	2.42574	0.912777	0.00168132	1.04231	0.914724	0.176707	1.1749	0.891632	0.601775	1.66487	1.10182
ENSMUSP00000050497	ENSMUSG00000052234	Epx	P49290 "Eosinophil peroxidase Precursor (EPO)(EC 1.11.1.7) [Contains Eosinophil peroxidase light chain;Eosinophil peroxidase heavy chain]"	0.3198	46	6	0.1802	19	6				0.684571	0.298316	2.3157	0.36594	0.0291712	2.34845				1.14491	0.177472	1.24829	1.0723	0.279467	1.15952				1.02761	0.684636	1.17652	1.02603	0.788992	1.26359				0.679097	0.256434	2.17447	0.396114	0.0178944	1.98695				1.36146
ENSMUSP00000006301	ENSMUSG00000029703	Lrwd1	Q8BUI3 "Leucine-rich repeat and WD repeat-containing protein 1 "	0.2917	36	7	0.1003	12	4	0.4028	37	7	1.2894	0.21512	1.56646	0.996696	0.98364	1.60499	1.24609	0.00126638	1.09915	1.14545	0.578476	1.76105	1.27171	0.503676	2.74371	1.05074	0.460288	1.16599	1.24133	0.391368	1.77324	1.01052	0.916587	1.33983	1.04397	0.780726	1.43565	1.17382	0.470443	1.66396	0.936551	0.735607	1.75583	1.06791	0.416216	1.2022	1.31361
ENSMUSP00000067579	ENSMUSG00000024785	Rcl1	Q9JJT0 "RNA 3'-terminal phosphate cyclase-like protein "	0.4155	31	6	0.3512	16	7	0.3539	22	4	1.02385	0.89771	1.56552	1.05594	0.517103	1.21357	0.920976	0.0262919	1.06602	0.984862	0.952767	1.87739	1.03026	0.334736	1.07204	0.810787	0.0063674	1.10233	1.04793	0.837322	1.74463	1.00518	0.930881	1.14999	0.899041	0.737457	2.51132	1.04378	0.846384	1.71607	1.04198	0.596557	1.19733	0.921289	0.58284	1.52975	1.16597
ENSMUSP00000023709	ENSMUSG00000061527	Krt5	Q922U2 "Keratin, type II cytoskeletal 5 (Cytokeratin-5)(CK-5)(Keratin-5)(K5)(Type-II keratin Kb5)"	0.405	48	5							2.50489	0.0110944	1.76924							0.701205	0.450167	3.24982							0.745533	0.466048	2.7536							0.809006	0.625228	3.04548							0.976979
ENSMUSP00000120932	ENSMUSG00000039671	Zmynd8	A2A480;Q6P4S7 "Protein kinase C binding protein 1 Fragment ";"Prkcbp1 protein Fragment "	0.1717	44	7				0.2439	26	1	0.971214	0.860417	1.47611				1.23495			0.990011	0.959519	1.59083				0.922677			0.969421	0.880144	1.62098				1.54429			1.0151	0.940998	1.60865				1.16586			0.972844
ENSMUSP00000098006	ENSMUSG00000042524	Sun2	Q6A022 "MKIAA0668 protein Fragment "	0.2736	54	7	0.2732	27	9	0.4506	47	7	0.924761	0.360814	1.21351	0.899314	0.0632339	1.12023	1.12126	0.074372	1.13864	0.915391	0.456948	1.31276	0.905567	0.0321236	1.09234	1.03011	0.310233	1.0677	0.765263	0.0218239	1.23733	0.825914	0.00172059	1.10028	1.05384	0.557627	1.22966	0.809379	0.130914	1.34438	0.889155	0.000525218	1.04979	0.904888	0.21034	1.19051	0.996042
ENSMUSP00000096958	ENSMUSG00000062328	Rpl17	Q9CPR4 "60S ribosomal protein L17 "	0.4819	23	7	0.4352	17	5				1.31374	0.139435	1.48002	1.27946	0.355467	1.92582				1.10099	0.598163	1.5269	1.06251	0.421501	1.20696				1.31322	0.19627	1.582	1.14741	0.404902	1.50735				1.27851	0.234702	1.57645	1.27262	0.338532	1.85189				1.35832
ENSMUSP00000084837	ENSMUSG00000024943	Smc5	Q8CG46 "Structural maintenance of chromosomes protein 5 (SMC protein 5)(SMC-5)(mSMC5)"	0.2079	61	6	0.2024	35	8	0.3061	62	3	0.892691	0.224241	1.23429	0.942574	0.325144	1.14132	1.13331	0.165012	1.28521	0.984132	0.818055	1.18484	1.06104	0.181575	1.09908	1.04196	0.280863	1.12845	0.869705	0.135214	1.22342	0.879074	0.00612264	1.08192	1.16253	0.20777	1.42327	0.940729	0.503117	1.24338	0.974062	0.356379	1.06498	1.04961	0.409884	1.2233	0.880879
ENSMUSP00000104276	ENSMUSG00000008373	Prpf31	NP_001153186.1 "U4/U6 small nuclear ribonucleoprotein Prp31 isoform 2 "	0.1924	20	5	0.2028	11	4	0.2525	23	2	1.22249	0.182528	1.41372	0.866972	0.153451	1.26987	0.983864	0.576606	1.30156	1.2645	0.177698	1.49005	1.07977	0.565035	1.46054	1.02682	0.722447	2.05793	1.34831	0.119961	1.52318	0.841776	0.0781198	1.2314	1.24602	0.511018	18.0511	1.27289	0.247629	1.64093	0.883684	0.103899	1.18558	1.01198	0.953366	7.85588	1.40112
ENSMUSP00000100863	ENSMUSG00000078427	Sarnp	Q9D1J3 "SAP domain-containing ribonucleoprotein (Nuclear protein Hcc-1)"	0.4286	12	7	0.5286	20	8	0.5762	21	3	0.959075	0.7591	1.37511	0.845757	0.198668	1.3219	0.846257	0.0777989	1.23737	0.993022	0.930169	1.20627	1.00675	0.889126	1.11641	1.09931	0.474471	1.59421	1.01466	0.802573	1.14594	0.912021	0.219261	1.17518	1.32028	0.558903	5.58468	1.03767	0.617783	1.18771	0.947806	0.463894	1.17781	1.06278	0.685123	1.74791	1.13498
ENSMUSP00000103809	ENSMUSG00000020697	Lig3	P97386 "DNA ligase 3 (EC 6.5.1.1)(DNA ligase III)(Polydeoxyribonucleotide synthase [ATP] 3)"	0.2431	57	7	0.17	23	11	0.2945	54	4	1.23026	0.157389	1.36881	1.12083	0.0856721	1.14259	1.13106	0.0309789	1.1072	1.06552	0.688658	1.44653	0.997848	0.923983	1.05028	0.942663	0.00632511	1.02774	1.04549	0.790051	1.47849	0.889263	0.0595932	1.13099	1.02913	0.854554	1.5806	1.1173	0.434729	1.38308	1.01923	0.696809	1.11161	0.956832	0.567027	1.24482	1.14035
ENSMUSP00000025918	ENSMUSG00000024966	Stip1	Q60864 "Stress-induced-phosphoprotein 1 (STI1)(mSTI1)(Hsc70/Hsp90-organizing protein)(Hop)"	0.256	39	6	0.2247	15	9	0.3573	32	9	0.802912	0.0886783	1.30674	1.07505	0.0655219	1.08139	0.833021	9.49729e-07	1.03207	0.920736	0.501237	1.34053	0.923664	0.00272327	1.04381	0.983584	0.435674	1.04762	1.01186	0.924313	1.35463	1.11042	0.00179269	1.0541	0.940797	0.186879	1.1024	0.888417	0.420214	1.41414	1.12916	0.00767501	1.08247	1.02733	0.558275	1.10715	0.961604
ENSMUSP00000087372	ENSMUSG00000068479	Mfap1a	Q9CQU1 "Microfibrillar-associated protein 1 "	0.3303	37	6	0.1845	16	4				0.98737	0.936703	1.47909	0.954225	0.707235	1.43455				0.863255	0.493215	1.66812	1.09135	0.188008	1.17796				0.978683	0.889893	1.46284	1.10833	0.184879	1.21027				0.920377	0.686135	1.6452	0.940729	0.654751	1.48138				1.02195
ENSMUSP00000091163	ENSMUSG00000070002	Ell	O08856 "RNA polymerase II elongation factor ELL (Eleven-nineteen lysine-rich leukemia protein)"	0.2724	33	8	0.08472	8	1	0.2292	30	2	0.911518	0.267482	1.19947	0.87877			0.936311	0.725044	6.13546	1.06936	0.537277	1.27699	0.98758			0.936852	0.579412	2.90509	0.90444	0.285988	1.22833	0.973669			0.750696	0.643616	334.941	0.91365	0.329541	1.22609	0.88276			0.808057	0.235022	2.85118	1.08899
ENSMUSP00000069508	ENSMUSG00000026245	Farsb	Q9WUA2 "Phenylalanyl-tRNA synthetase beta chain (EC 6.1.1.20)(Phenylalanine--tRNA ligase beta chain)(PheRS)"	0.2649	37	6	0.2071	26	6	0.3311	32	4	0.983032	0.673694	1.10349	1.21627	0.00148933	1.08327	1.00609	0.943027	1.28293	0.915968	0.271325	1.20029	0.910262	0.00018602	1.02491	0.956761	0.380028	1.14679	1.04001	0.539401	1.16553	1.02303	0.658586	1.13287	1.05724	0.822182	2.05974	1.01022	0.84867	1.13898	1.16841	0.0127444	1.11133	1.13299	0.663558	2.28506	0.919864
ENSMUSP00000075313	ENSMUSG00000063334	Krr1	Q8BGA5 "KRR1 small subunit processome component homolog (HIV-1 Rev-binding protein 2 homolog)"	0.3053	31	5	0.3737	19	11	0.4132	29	4	0.988795	0.940546	1.48304	1.00134	0.993962	1.46951	0.982937	0.655322	1.11728	1.00331	0.98621	1.64595	1.05434	0.155734	1.07982	0.823385	0.015994	1.13362	0.772452	0.14443	1.48561	0.898432	0.225986	1.20315	0.935364	0.786003	2.04714	1.02335	0.896362	1.58688	0.981092	0.904999	1.41544	0.982402	0.927091	1.76541	1.24038
ENSMUSP00000039688	ENSMUSG00000035047	Kri1	Q8VDQ9 "Protein KRI1 homolog "	0.2249	31	6	0.1601	12	4				1.03475	0.674994	1.21824	1.08562	0.171161	1.15712				1.02994	0.756512	1.26053	0.970764	0.5545	1.15295				1.30022	0.0252764	1.23866	1.01502	0.82791	1.22161				1.23176	0.0217925	1.1771	0.9444	0.646866	1.4316				1.58088
ENSMUSP00000021277	ENSMUSG00000020897	Aurkb	O70126 "Serine/threonine-protein kinase 12 (EC 2.7.11.1)(Aurora kinase B)(Serine/threonine-protein kinase aurora-B)(Aurora/IPL1-related kinase 2)(Aurora-related kinase 2)(ARK-2)(Serine/threonine-protein kinase 5)(STK-1)"	0.3478	27	6	0.2319	8	2	0.3507	23	4	0.997194	0.983699	1.40005	0.850853	0.4935	7.46881	0.629852	0.000111914	1.05606	1.17013	0.251523	1.36569	0.936417	0.27281	1.46423	0.790575	0.000722466	1.05321	1.13872	0.419767	1.46241	0.922028	0.595306	4.04674	0.824276	0.110398	1.31501	1.06877	0.61687	1.37823	0.934942	0.463777	2.14389	0.676	0.00568614	1.19104	1.32526
ENSMUSP00000039657	ENSMUSG00000033161	Atp1a1	Q8VDN2 "Sodium/potassium-transporting ATPase subunit alpha-1 Precursor (Na(+)/K(+) ATPase alpha-1 subunit)(EC 3.6.3.9)(Sodium pump subunit alpha-1)"	0.2111	45	6	0.1212	18	6	0.2805	42	7	1.00115	0.989272	1.2317	0.812771	0.0359898	1.20595	1.02885	0.684691	1.1773	1.07148	0.613807	1.39107	1.52322	0.00771579	1.2861	1.1325	0.341184	1.34258	1.39445	0.00412562	1.1867	1.72032	0.00454355	1.33066	1.33905	0.0310863	1.29043	1.19959	0.0593207	1.21225	1.06026	0.471927	1.21343	1.30595	0.182845	1.5431	1.20907
ENSMUSP00000087073	ENSMUSG00000068329	Htra2	Q9JIY5 "Serine protease HTRA2, mitochondrial Precursor (EC 3.4.21.108)(High temperature requirement protein A2)(HtrA2)(Omi stress-regulated endoprotease)(Serine proteinase OMI)(Serine protease 25)"	0.3603	24	5	0.2773	17	6	0.6092	37	4	0.913838	0.54625	1.5261	0.665478	0.000175727	1.11105	0.652145	0.0140905	1.30141	1.25308	0.13633	1.40022	0.91075	0.00650661	1.05509	1.11596	0.447779	1.49292	1.00034	0.998535	1.63103	0.753738	0.000340193	1.0876	0.675037	0.197009	2.13132	1.20207	0.218341	1.41934	0.878703	0.0147503	1.09536	0.891295	0.568211	1.77353	0.972193
ENSMUSP00000099885	ENSMUSG00000020272	Stk10	O55098 "Serine/threonine-protein kinase 10 (EC 2.7.11.1)(Lymphocyte-oriented kinase)"	0.2164	51	6							0.82847	0.193751	1.38044							1.03229	0.82389	1.41688							1.0491	0.685814	1.33285							1.11469	0.423337	1.37753							1.2176
ENSMUSP00000035456	ENSMUSG00000038510	Rpf2	Q9JJ80 "Ribosome production factor 2 homolog (Ribosome biogenesis protein RPF2 homolog)(Brix domain-containing protein 1)"	0.4652	31	5	0.4762	18	6	0.5311	29	5	0.91212	0.44295	1.35016	0.768393	0.00505302	1.15287	1.19761	0.00137187	1.0652	0.838914	0.0455562	1.18531	0.971892	0.143563	1.04319	0.79357	0.00103794	1.07818	0.880662	0.662639	2.11724	0.960659	0.645744	1.23511	1.6003	0.0913617	1.80385	0.969029	0.534653	1.13736	0.943577	0.232107	1.1161	1.50867	0.00615752	1.2412	1.09973
ENSMUSP00000020448	ENSMUSG00000020227	Irak3	Q8K4B2 "Interleukin-1 receptor-associated kinase 3 (IRAK-3)(EC 2.7.11.1)(IL-1 receptor-associated kinase M)(IRAK-M)"	0.2233	25	6				0.2184	25	2	0.551331	0.0530675	1.83505				0.510553	0.0756243	2.77175	0.681334	0.0124576	1.29524				0.745696	0.157992	2.57222	0.621382	0.0285509	1.49421				0.553544	0.147789	5.90911	0.712061	0.0322009	1.34557				0.720919	0.15869	2.88181	0.646785
ENSMUSP00000022416	ENSMUSG00000021866	Anxa11	P97384 "Annexin A11 (Annexin-11)(Annexin XI)(Calcyclin-associated annexin 50)(CAP-50)"	0.2863	28	8	0.3201	18	11				1.06084	0.623141	1.31232	0.922824	0.390839	1.22081				0.856785	0.0522603	1.16959	1.25171	0.000205809	1.09218				1.146	0.0948606	1.1817	1.1048	0.111933	1.13586				0.966433	0.498698	1.12307	0.557574	0.00457609	1.43057				1.26567
ENSMUSP00000001631	ENSMUSG00000001588	Acap1	Q8K2H4 "Arf-GAP with coiled-coil, ANK repeat and PH domain-containing protein 1 (Centaurin-beta-1)(Cnt-b1)"	0.2162	30	6	0.1365	13	4	0.2743	35	1	1.08527	0.117323	1.11773	0.807575	0.059571	1.25834	0.945078			0.84864	0.181341	1.3124	0.826654	0.0143856	1.12547	1.00589			1.05076	0.446434	1.16664	0.99778	0.954113	1.11986	0.790148			0.764752	0.0216054	1.23282	0.596068	0.00486903	1.24466	0.918332			0.913182
ENSMUSP00000028817	ENSMUSG00000027342	Pcna	P17918 "Proliferating cell nuclear antigen (PCNA)(Cyclin)"	0.4674	23	5	0.4559	15	8	0.7126	41	12	1.33552	0.0482039	1.33054	1.07982	0.40769	1.22901	0.961792	0.0584725	1.04145	1.17555	0.133728	1.27022	1.1381	0.00630597	1.08275	0.909343	0.0148344	1.07519	1.06624	0.671667	1.47695	1.0089	0.874474	1.13648	1.84318	0.0353176	1.75262	0.943134	0.243096	1.12614	1.06909	0.19303	1.11597	1.0879	0.542299	1.34299	1.10163
ENSMUSP00000007042	ENSMUSG00000024474	Ik	Q9Z1M8 "Protein Red (Protein RER)(IK factor)(Cytokine IK)"	0.3196	45	5				0.4201	43	6	0.984296	0.933226	1.63675				1.01512	0.754177	1.12372	1.02899	0.870255	1.57727				0.966018	0.470736	1.12072	1.0867	0.705128	1.76416				1.10876	0.212761	1.20434	0.991829	0.96817	1.70991				0.974303	0.285153	1.05753	1.13059
ENSMUSP00000113388	ENSMUSG00000034218	Atm	Q62388 "Serine-protein kinase ATM (EC 2.7.11.1)(Ataxia telangiectasia mutated homolog)(A-T mutated homolog)"	0.1774	128	7	0.08382	50	6	0.199	119	3	0.983803	0.834537	1.20101	0.839054	0.100373	1.25134	1.06851	0.528965	1.45871	0.726467	0.0217816	1.28948	0.660096	0.00552795	1.2575	0.751132	0.0757801	1.43299	0.865452	0.0640712	1.16893	0.810913	0.0568743	1.24434	0.794169	0.276953	1.95412	0.81656	0.052187	1.2279	0.639454	0.00378623	1.25312	0.838059	0.12139	1.33932	0.845738
ENSMUSP00000090565	ENSMUSG00000061288	Taok3	Q8BYC6 "Serine/threonine-protein kinase TAO3 (EC 2.7.11.1)(Thousand and one amino acid protein 3)"	0.1793	39	6	0.1381	23	5				1.33212	0.000132278	1.0724	1.45451	0.00371519	1.18682				0.763358	0.000164648	1.07131	0.971974	0.270975	1.06379				1.10194	0.177053	1.17222	1.15322	0.00822814	1.08468				0.812523	0.00305275	1.10482	0.831113	0.00932186	1.1155				0.85514
ENSMUSP00000100802	ENSMUSG00000078377	CT027556.1	CT027556.1 B8JKK2 "Ribosomal protein L15 Fragment "	0.5539	24	6	0.5588	21	8	0.6569	40	8	1.08464	0.631309	1.50539	1.5182	0.172411	1.91517	1.05447	0.0296699	1.04716	0.93676	0.615621	1.36886	1.0626	0.135261	1.08879	0.963688	0.420873	1.10773	1.0291	0.912324	1.89059	1.34876	0.0130465	1.23881	1.34874	0.346942	2.01739	1.13984	0.243433	1.28989	1.47262	0.134626	1.71812	1.44827	0.00855796	1.27411	0.955939
ENSMUSP00000025542	ENSMUSG00000024640	Psat1	Q99K85 "Phosphoserine aminotransferase (PSAT)(EC 2.6.1.52)(Phosphohydroxythreonine aminotransferase)(Endometrial progesterone-induced protein)(EPIP)"	0.327	27	7	0.273	17	7	0.4838	32	7	0.899659	0.309558	1.27185	0.84984	0.0512935	1.17818	0.921969	0.409413	1.25135	1.20714	0.0442621	1.19911	0.756994	4.57293e-05	1.06755	1.09678	0.40449	1.28676	1.13331	0.238048	1.27149	0.86287	0.00825785	1.09772	0.813281	0.436121	1.83358	1.13455	0.236051	1.27265	1.0775	0.245203	1.15237	0.91075	0.547761	1.43223	1.10112
ENSMUSP00000029989	ENSMUSG00000028309	Rnf20	Q5DTM8 "E3 ubiquitin-protein ligase BRE1A (BRE1-A)(EC 6.3.2.-)(RING finger protein 20)"	0.2395	58	5	0.147	21	7	0.3751	73	9	0.850826	0.0756742	1.20698	0.945047	0.437489	1.18095	0.935916	0.0426877	1.0655	0.943541	0.168637	1.10091	0.989111	0.824356	1.12249	0.929823	0.023434	1.06191	0.999402	0.994016	1.23168	0.972861	0.822472	1.33274	1.13395	0.0140944	1.09716	0.868736	0.00440054	1.0697	0.862831	0.0173517	1.11729	0.993307	0.835965	1.07508	1.00045
ENSMUSP00000024223	ENSMUSG00000023456	Tpi1	P17751 "Triosephosphate isomerase (TIM)(EC 5.3.1.1)(Triose-phosphate isomerase)"	0.3735	16	6	0.6305	22	7	0.6546	23	8	1.51466	0.188833	2.01775	1.6255	1.47461e-05	1.09828	1.06013	0.0211648	1.04779	1.08802	0.770416	2.02168	1.09947	0.315857	1.23623	1.42284	0.00124377	1.17372	1.2838	0.354083	1.87588	1.06554	0.0899882	1.07996	1.21207	0.624358	2.43094	1.26219	0.40565	1.93384	1.31988	8.01064e-05	1.07455	1.2846	0.14993	1.44242	1.17405
ENSMUSP00000022378	ENSMUSG00000021831	Ero1l	Q8R180 "ERO1-like protein alpha Precursor (ERO1-L-alpha)(ERO1-L)(EC 1.8.4.-)(Oxidoreductin-1-L-alpha)(Endoplasmic oxidoreductin-1-like protein)"	0.2909	26	6	0.2759	17	8	0.4461	35	5	1.1638	0.319503	1.44884	1.48306	0.00326607	1.23762	1.17477	0.0371962	1.15664	1.06823	0.712484	1.58876	1.28286	0.000901763	1.11295	1.59462	0.011352	1.33895	1.26079	0.163638	1.45877	1.46866	0.00649885	1.26825	1.48775	0.124183	1.76484	1.37797	0.133658	1.60646	1.61291	0.00115763	1.23916	1.33092	0.0491753	1.32864	1.23724
ENSMUSP00000029013	ENSMUSG00000027509	Rae1	Q8C570 "mRNA export factor (mRNA-associated protein mrnp 41)(Rae1 protein homolog)"	0.3261	24	6	0.2065	11	5	0.3288	22	4	1.06396	0.22777	1.12298	1.01462	0.690694	1.09874	0.989223	0.603139	1.06135	0.951711	0.401745	1.14905	1.04482	0.238307	1.09185	0.966003	0.153844	1.05968	0.905427	0.620176	1.62237	1.05651	0.160607	1.09279	0.802037	0.56594	2.97881	1.04121	0.572024	1.18748	0.978586	0.610648	1.11512	0.930565	0.741063	1.88104	1.04167
ENSMUSP00000081572	ENSMUSG00000066148	Prpf4	Q9DAW6 "U4/U6 small nuclear ribonucleoprotein Prp4 (U4/U6 snRNP 60 kDa protein)(WD splicing factor Prp4)"	0.2687	27	6	0.2169	14	6	0.2668	27	6	0.999998	1	1.20556	0.842621	0.0934034	1.23717	0.917843	0.074145	1.10285	1.00963	0.956113	1.53089	1.00099	0.96731	1.06089	1.08101	0.251488	1.16708	1.04922	0.729834	1.40237	0.945537	0.0857362	1.06973	0.772895	0.212227	1.58931	0.970373	0.717494	1.22373	0.85116	0.0036455	1.08395	0.859997	0.243404	1.34086	1.03749
ENSMUSP00000068408	ENSMUSG00000055531	Cpsf6	Q6NVF9 "Cleavage and polyadenylation specificity factor subunit 6 "	0.2523	24	6	0.3085	26	6	0.3848	33	9	0.882745	0.405242	1.42322	1.06255	0.627157	1.3521	0.859401	0.000991308	1.07166	0.939336	0.716006	1.51864	1.02947	0.172607	1.04806	1.00463	0.860304	1.06042	0.969655	0.852422	1.49852	0.948718	0.338007	1.13632	0.986535	0.853829	1.17856	0.964933	0.815831	1.4533	1.0174	0.862555	1.27555	0.895666	0.0254852	1.0972	0.928181
ENSMUSP00000020931	ENSMUSG00000020608	Smc6	Q924W5 "Structural maintenance of chromosomes protein 6 (SMC protein 6)(SMC-6)(mSMC6)"	0.2562	72	6	0.0948	16	3	0.3382	66	5	1.00032	0.998449	1.50242	0.957036	0.833083	2.20179	1.04172	0.505832	1.16815	1.21532	0.19123	1.39355	1.30232	0.218158	1.89822	1.03163	0.305419	1.07639	0.828177	0.54603	2.1147	0.848291	0.405896	1.96957	0.769766	0.467623	2.47444	1.1206	0.460549	1.44253	1.08793	0.58456	1.75318	1.02668	0.821272	1.35392	1.08161
ENSMUSP00000074380	ENSMUSG00000059912	AC154235.2	AC154235.2 AC154235.2-201 "null" "Clone_based_ensembl_transcript"	0.425	15	6	0.525	17	4	0.8313	35	4	1.26128	0.126414	1.38505	1.25033	0.176387	1.49719	1.05415	0.0974821	1.073	1.10953	0.419148	1.35482	1.05272	0.492225	1.23315	0.940325	0.0660331	1.07156	1.01503	0.96217	2.15822	1.29315	0.0351256	1.25008	0.516234	0.163351	3.1413	1.16017	0.400201	1.51524	1.25689	0.0469744	1.24966	0.946184	0.768841	1.72856	1.21597
ENSMUSP00000059395	ENSMUSG00000035150	Eif2s3x	Q9Z0N1 "Eukaryotic translation initiation factor 2 subunit 3, X-linked (Eukaryotic translation initiation factor 2 subunit gamma, X-linked)(eIF-2-gamma X)"	0.3242	33	6	0.3708	23	2	0.4237	29	5	0.902367	0.359864	1.29968	0.763617	0.0927415	1.65326	0.948811	0.174813	1.09258	1.0082	0.947627	1.35544	0.949867	0.231047	1.28168	1.1455	0.0167843	1.10011	0.980517	0.905607	1.50022	0.862783	0.0807561	1.27019	1.0604	0.730255	1.55301	0.908141	0.48678	1.39112	0.847386	0.0057854	1.01931	1.32761	0.0505088	1.32889	0.945689
ENSMUSP00000045841	ENSMUSG00000026615	Eprs	Q8CGC7 "Bifunctional aminoacyl-tRNA synthetase [Includes Glutamyl-tRNA synthetase(EC 6.1.1.17)(Glutamate--tRNA ligase)(GluRS);Prolyl-tRNA synthetase(EC 6.1.1.15)(Proline--tRNA ligase)(ProRS)]"	0.2169	87	7	0.08598	26	2	0.2407	62	2	1.14044	0.179341	1.23562	1.13769	0.28041	2.16536	1.09812	0.361253	2.13405	1.00465	0.950631	1.19237	0.978959	0.860767	3.37251	0.993186	0.766228	1.25341	1.00847	0.929387	1.25023	1.02319	0.578452	1.4531	1.14568	0.420569	3.82991	1.03138	0.657194	1.17589	1.06895	0.714141	5.80159	1.17353	0.0745234	1.2701	0.958019
ENSMUSP00000001365	ENSMUSG00000028811	Yars	Q91WQ3 "Tyrosyl-tRNA synthetase, cytoplasmic (EC 6.1.1.1)(Tyrosyl--tRNA ligase)(TyrRS)"	0.2695	35	6	0.2199	18	5	0.2571	25	2	0.729212	0.00788837	1.20906	0.870432	0.0519218	1.15097	0.915754	0.0121733	1.02161	0.976332	0.640817	1.13214	1.002	0.927965	1.05945	1.01096	0.74094	1.37886	0.690578	0.000335755	1.11591	0.723774	0.0994259	1.52188	0.5766	0.3666	93.899	0.763478	0.0710591	1.35473	0.91155	0.0215399	1.07272	0.99012	0.830408	1.58773	0.830758
ENSMUSP00000018992	ENSMUSG00000018848	Rars	Q9D0I9 "Arginyl-tRNA synthetase, cytoplasmic (EC 6.1.1.19)(Arginine--tRNA ligase)(ArgRS)"	0.25	38	7	0.1545	17	5	0.2894	33	1	1.18635	0.193617	1.33067	1.1842	0.232504	1.39633	1.20382			1.1491	0.182815	1.25337	0.823763	0.0318731	1.1811	1.06214			1.23808	0.0821051	1.28476	1.08106	0.226615	1.16366	0.689089			1.09756	0.377792	1.27028	1.17586	0.0474994	1.17244	1.06086			1.084
ENSMUSP00000113410	ENSMUSG00000029227	Fip1l1	006 "FIP1 like 1 (S. cerevisiae) Gene [Source:MGI (curated);Acc:MGI:1914149]" "MGI_curated_transcript"	0.2071	24	5	0.2321	13	5	0.3201	30	4	1.00761	0.812549	1.08663	0.770538	0.0496905	1.297	0.908111	0.0980271	1.13783	1.0559	0.384826	1.16753	1.12604	0.240293	1.27018	0.996175	0.885842	1.08124	0.847095	0.288414	1.45735	0.880683	0.0394171	1.12417	0.546307	0.407716	7.41232	0.921494	0.0145471	1.05656	0.77583	0.0383714	1.26076	0.693297	0.300378	2.54339	0.970232
ENSMUSP00000103365	ENSMUSG00000059070	Rpl18	P35980 "60S ribosomal protein L18 "	0.5319	20	6	0.5106	15	6	0.6383	31	6	1.56008	0.102691	1.77421	1.36523	0.113433	1.51837	1.13701	0.065452	1.15074	1.2011	0.247932	1.43377	1.06066	0.0480522	1.05989	0.993317	0.912904	1.1617	1.61024	0.173681	2.16501	1.20787	0.0199742	1.15517	1.21243	0.356001	1.62773	1.42641	0.11271	1.60834	1.2354	0.125993	1.34477	1.31813	0.0259454	1.25465	1.51984
ENSMUSP00000089999	ENSMUSG00000061032	Rrp1	P56183 "Ribosomal RNA processing protein 1 homolog A (RRP1-like protein)(Novel nuclear protein 1)(NNP-1)(Nucleolar protein Nop52)"	0.3905	42	7				0.4086	23	1	1.04346	0.699611	1.29319				1.22764			1.05299	0.515994	1.20096				0.613906			1.23948	0.124786	1.34255				0.680887			1.2186	0.201204	1.40082				1.44597			1.26532
ENSMUSP00000105672	ENSMUSG00000020453	Patz1	Q78I23;Q80XS2;Q9JLY9 "Patz1 protein ";"Patz1 protein ";"PATZ Fragment "	0.3017	27	5	0.07279	6	2				0.981063	0.912519	1.57416	0.692761	0.00231154	1.01708				1.05051	0.820599	1.75946	0.765823	0.0750507	1.49408				1.09325	0.562074	1.47994	0.514489	0.356755	200.064				1.02031	0.913854	1.62363	0.716252	0.145571	2.68279				1.12432
ENSMUSP00000038610	ENSMUSG00000039117	Taf4a	A2AC70;Q3UWM6;Q91WW6 "TAF4A RNA polymerase II, TATA box binding protein (TBP)-associated factor Fragment ";"Putative uncharacterized protein Fragment ";"TATA-binding protein associated factor TAFII135 Fragment "	0.1919	37	5	0.1612	26	3				0.898149	0.160142	1.18904	0.940406	0.245329	1.17649				0.947099	0.561964	1.26985	0.979008	0.730998	1.26001				0.993793	0.906557	1.14829	1.02073	0.367778	1.07952				0.942587	0.340605	1.16401	0.885615	0.027933	1.09334				0.949232
ENSMUSP00000104171	ENSMUSG00000040667	Nup88	Q3TM09;Q3U9L4;Q5QNU1;Q8BQF0;Q8CAD9 "Putative uncharacterized protein ";"Putative uncharacterized protein Fragment ";"Nucleoporin 88Nucleoporin 88, isoform CRA_e ;";"Putative uncharacterized protein ";"Putative uncharacterized protein "	0.2125	30	6	0.1553	17	5	0.3533	39	4	1.14392	0.0213056	1.11019	1.18128	0.0549785	1.18802	0.896413	0.373705	1.39613	1.04294	0.604793	1.21637	1.07791	0.528349	1.35254	0.941719	0.407201	1.21983	1.05489	0.457165	1.18599	1.05555	0.329294	1.14479	0.618824	0.103603	1.93444	1.01227	0.861131	1.18555	0.97944	0.80814	1.24899	0.754038	0.0551361	1.34163	1.12264
ENSMUSP00000081772	ENSMUSG00000052293	Taf9	Q8VI33 "Transcription initiation factor TFIID subunit 9 (Transcription initiation factor TFIID 31 kDa subunit)(TAFII-31)(TAFII31)(Transcription initiation factor TFIID 32 kDa subunit)(TAFII-32)(TAFII32)(RNA polymerase II TBP-associated factor subunit G)"	0.428	20	6	0.1402	5	2	0.3674	18	3	1.14153	0.451238	1.51694	1.15544	0.119809	1.41854	0.954873	0.675638	1.50644	1.21625	0.308926	1.55983	0.995727	0.807744	1.19082	0.906948	0.18201	1.23243	1.1743	0.433575	1.62476	1.12049	0.188707	1.55503	0.877076	0.459241	1.8604	1.24462	0.28641	1.60258	0.973984	0.850016	4.03613	0.835737	0.0322714	1.15278	1.19316
ENSMUSP00000096073	ENSMUSG00000036550	Cnot1	Q6ZQ08 "CCR4-NOT transcription complex subunit 1 (CCR4-associated factor 1)"	0.1788	101	7	0.08094	35	4	0.2441	97	4	1.0253	0.837337	1.32992	1.37089	0.0590792	1.40215	0.91835	0.0231408	1.06506	0.943638	0.641978	1.33657	1.02619	0.729253	1.2417	1.05455	0.550407	1.28655	0.954712	0.727474	1.36412	1.2253	0.176631	1.44389	1.16857	0.371056	1.60374	1.00689	0.961453	1.39592	1.20386	0.363955	1.73835	1.18757	0.12802	1.2995	0.938592
ENSMUSP00000086909	ENSMUSG00000021952	Xpo4	Q9ESJ0 "Exportin-4 (Exp4)"	0.1877	45	9				0.2111	44	6	0.997591	0.969979	1.15399				0.882823	0.0470485	1.13005	1.06473	0.429658	1.18992				1.02323	0.474902	1.07945	0.855916	0.10593	1.21764				0.791601	0.249433	1.58599	1.12426	0.160352	1.1907				1.04679	0.677118	1.30488	0.880113
ENSMUSP00000081906	ENSMUSG00000028809	Srrm1	A2A8V9 "Serine/arginine repetitive matrix 1 "	0.2526	45	3	0.2603	33	3	0.4376	78	2	0.97098	0.095248	1.04309	0.88812	0.120448	1.21567	0.777559	0.208688	2.96581	0.814027	0.0721941	1.28626	1.2526	0.0406376	1.22331	0.949403	0.4004	1.61599	1.33947	0.0522423	1.34893	1.15916	0.144654	1.31282	0.72741	0.390767	17.2769	0.867253	0.233351	1.43754	0.83025	0.0677225	1.24562	0.779578	0.193388	2.69603	1.04288
ENSMUSP00000031513	ENSMUSG00000029538	Sfrs9	Q9D0B0 "Splicing factor, arginine/serine-rich 9 "	0.5856	17	5	0.3153	11	5	0.8288	38	5	1.401	0.0630616	1.44274	1.3077	0.00335232	1.12666	1.22646	0.000819351	1.06448	1.07715	0.319248	1.19908	1.19192	0.00156189	1.0657	1.01325	0.677237	1.08492	1.28087	0.229106	1.6234	1.17156	0.000548874	1.04465	0.883957	0.44849	1.5037	1.29939	0.0428755	1.28179	1.14162	0.0163031	1.0966	1.04567	0.29854	1.10943	1.36699
ENSMUSP00000045945	ENSMUSG00000042133	Ppig	A2AR02 "Peptidyl-prolyl cis-trans isomerase G (Peptidyl-prolyl isomerase G)(PPIase G)(EC 5.2.1.8)(Rotamase G)(Cyclophilin G)"	0.2926	45	4	0.1622	22	2	0.391	63	2	0.802362	0.15399	1.44662	0.848346	0.312766	3.05903	0.893011	0.283302	1.98515	0.72417	0.0294059	1.29896	0.966853	0.364644	1.31812	0.837956	0.403413	5.20956	0.990442	0.941193	1.46441	1.07943	0.0251154	1.03908	1.15459	0.783734	175.552	0.730768	0.0994744	1.52662	0.71839	0.161682	2.97678	0.863783	0.626787	16.4703	0.888037
ENSMUSP00000021052	ENSMUSG00000078619	Smarcd2	Q99JR8 "SWI/SNF-related matrix-associated actin-dependent regulator of chromatin subfamily D member 2 (60 kDa BRG-1/Brm-associated factor subunit B)(BRG1-associated factor 60B)(BAF60B)"	0.354	44	5	0.3992	31	13	0.5806	38	7	1.00378	0.963198	1.23774	0.960421	0.51767	1.14113	1.03445	0.528403	1.13188	0.875209	0.306658	1.37167	1.02258	0.870224	1.33845	1.06097	0.621927	1.32143	0.974331	0.256228	1.05605	0.932671	0.195101	1.11704	1.0435	0.82715	1.57899	0.898598	0.129032	1.16831	0.8634	0.00838243	1.10696	0.939168	0.419736	1.19402	0.977808
ENSMUSP00000020856	ENSMUSG00000020547	Bzw2	Q91VK1 "Basic leucine zipper and W2 domain-containing protein 2 "	0.3365	34	6	0.1742	13	4	0.2625	19	4	0.948684	0.547887	1.23402	1.09877	0.538166	1.54116	1.01143	0.462209	1.04394	0.932513	0.68353	1.5152	1.06942	0.283553	1.1781	1.07427	0.316211	1.20918	0.847417	0.281301	1.42272	0.945613	0.553059	1.30629	0.602389	0.120149	2.11367	0.99828	0.990432	1.42092	1.25492	0.142159	1.4406	1.0162	0.744624	1.15389	0.863293
ENSMUSP00000093945	ENSMUSG00000022789	Dnm1l	NP_690029.2 "dynamin 1-like isoform a "	0.3006	49	6							1.02824	0.787086	1.2856							1.21862	0.119026	1.31067							0.789811	0.408435	1.95936							1.07133	0.600802	1.3735							0.847299
ENSMUSP00000086788	ENSMUSG00000035161	Ints6	Q6PCM2 "Integrator complex subunit 6 (Int6)(Protein DDX26)(DBI-1)"	0.2106	43	5	0.08947	12	4	0.1857	34	4	0.823643	0.0213289	1.15792	0.763302	0.128875	1.51134	0.875053	0.073193	1.1697	0.947767	0.259102	1.12	0.902661	0.202361	1.22186	0.902641	0.0713803	1.12635	0.926364	0.180952	1.14022	0.841265	0.0411426	1.17321	0.875262	0.263832	1.36225	1.03838	0.538063	1.16816	0.977245	0.768268	1.255	1.06769	0.00354599	1.02514	0.746607
ENSMUSP00000066789	ENSMUSG00000055024	Ep300	B2RWS6;Q8BJ14 "Ep300 protein ";"Putative uncharacterized protein "	0.1144	71	7	0.05638	27	6	0.1422	78	4	0.934196	0.160628	1.10969	0.792211	0.148576	1.42031	0.733452	0.000226089	1.04738	0.930337	0.257148	1.15157	0.933361	0.322654	1.17543	0.876246	0.0127798	1.08176	0.916544	0.142693	1.13479	0.908954	0.269516	1.2186	0.977212	0.96511	4.68642	0.900713	0.127032	1.15549	0.813429	0.0610284	1.24669	0.906707	0.713837	2.16615	0.914758
ENSMUSP00000074293	ENSMUSG00000058013	Sept11	Q8C1B7 "Septin-11 "	0.3505	33	4	0.2991	22	1				1.25344	0.0988064	1.35488	1.46069						0.877629	0.365117	1.47716	0.941728						0.897459	0.369818	1.38687	0.859785						0.953311	0.634412	1.33438	0.845429						1.01008
ENSMUSP00000038716	ENSMUSG00000063895	Nupl1	Q8R332 "Nucleoporin p58/p45 (Nucleoporin-like protein 1)"	0.1993	24	6	0.1022	13	2	0.2095	25	7	1.0201	0.888826	1.41616	1.21948	0.682167	101.818	1.07649	0.335394	1.18797	0.96976	0.771549	1.29374	1.17211	0.603379	16.5842	1.02872	0.754155	1.23537	0.93237	0.622788	1.41015	1.07801	0.595578	3.64953	1.06597	0.826565	1.97973	1.01629	0.891176	1.33466	0.957485	0.392481	1.47873	0.967518	0.792976	1.34241	1.02043
ENSMUSP00000114135	ENSMUSG00000022601	Rpl24	Q8BT08;Q9CS31 "Putative uncharacterized protein Fragment ";"Putative uncharacterized protein Fragment "	0.4186	24	4	0.4128	16	7	0.7035	35	4	1.44091	0.0630376	1.49518	1.69738	0.0270511	1.56082	1.01067	0.570491	1.0546	1.15692	0.0863095	1.20223	1.04202	0.330554	1.09983	0.957909	0.14498	1.07234	1.48901	0.0181856	1.30909	1.4461	0.000256802	1.12488	0.826631	0.53739	2.3929	1.28159	0.0181281	1.18253	1.46521	0.0243801	1.36728	1.18366	0.212988	1.40539	1.40966
ENSMUSP00000021133	ENSMUSG00000020780	Srp68	Q8BMA6 "Signal recognition particle 68 kDa protein (SRP68)"	0.3339	42	5	0.2147	16	7				0.94218	0.523602	1.26726	1.21054	0.255908	1.45112				1.03243	0.821157	1.44348	0.966264	0.634369	1.18258				1.00814	0.901308	1.18565	1.02366	0.785207	1.22237				1.02101	0.857784	1.35267	1.07154	0.685056	1.4874				0.948074
ENSMUSP00000106561	ENSMUSG00000036980	Taf6	Q62311 "Transcription initiation factor TFIID subunit 6 (Transcription initiation factor TFIID 70 kDa subunit)(TAF(II)70)(TAFII-70)(TAFII70)(Transcription initiation factor TFIID 80 kDa subunit)(TAF(II)80)(TAFII-80)(TAFII80)(p80)"	0.2847	33	6	0.174	15	3	0.3223	31	2	0.950767	0.491327	1.1911	0.985309	0.568017	1.09858	1.04467	0.701059	2.98681	0.952905	0.405253	1.14627	1.05393	0.681084	1.60793	0.971167	0.755665	2.5106	0.980677	0.730962	1.1479	0.947735	0.0904155	1.07747	0.862066	0.0589384	1.19136	0.945887	0.510512	1.22383	0.932092	0.315438	1.25589	0.900192	0.0263164	1.05681	1.02857
ENSMUSP00000005826	ENSMUSG00000005683	Cs	Q9CZU6 "Citrate synthase, mitochondrial Precursor (EC 2.3.3.1)"	0.2953	24	7	0.2694	20	7	0.4461	31	4	1.48202	0.0300152	1.40542	1.66776	0.0646555	1.74037	1.10293	0.23046	1.2309	1.34332	0.100784	1.45172	1.14214	0.00753735	1.08582	1.14616	0.053435	1.15048	1.41974	0.0204097	1.309	1.25915	0.0120672	1.17213	0.614821	0.243575	2.91335	1.24221	0.064777	1.26504	1.36998	0.196666	1.69972	0.744853	0.253117	1.94329	1.50682
ENSMUSP00000047119	ENSMUSG00000042354	Gnl3	Q8CI11 "Guanine nucleotide-binding protein-like 3 (Nucleolar GTP-binding protein 3)(Nucleostemin)"	0.3327	37	5	0.2751	17	5	0.4498	37	8	0.915084	0.697718	1.80394	1.03428	0.789816	1.38872	1.00348	0.878274	1.05305	1.19369	0.481217	1.88434	1.1911	0.0455859	1.18448	0.982784	0.450332	1.05272	1.01947	0.939315	1.93629	0.961651	0.631175	1.23265	1.02108	0.894116	1.4297	1.25511	0.446174	2.11137	1.2163	0.235888	1.47707	1.09154	0.519304	1.35708	1.34327
ENSMUSP00000096454	ENSMUSG00000028106	Rprd2	Q6NXI6 "Regulation of nuclear pre-mRNA domain-containing protein 2 "	0.1743	57	6	0.1116	30	3	0.273	71	3	0.886654	0.0967347	1.16362	0.838523	0.0449188	1.18089	0.936585	0.0728337	1.08388	0.948357	0.481145	1.19627	1.02109	0.285768	1.0642	0.952714	0.271613	1.14871	0.83502	0.215349	1.38662	0.995467	0.904791	1.15552	1.0496	0.850526	2.64932	0.987961	0.849469	1.1686	0.938068	0.191778	1.15227	0.995369	0.966242	1.51911	1.02307
ENSMUSP00000048833	ENSMUSG00000040731	Eif4h	Q9WUK2 "Eukaryotic translation initiation factor 4H (eIF-4H)(Williams-Beuren syndrome chromosomal region 1 protein homolog)"	0.5	23	3	0.2823	9	4	0.7419	41	5	1.01578	0.920315	1.81442	1.25664	0.184856	1.52784	0.993801	0.808448	1.06893	1.13324	0.433041	1.73839	1.0069	0.974586	1.88287	1.00143	0.954953	1.06826	0.924949	0.67962	2.01754	1.07563	0.544357	1.40542	0.711942	0.420365	2.86143	1.0071	0.973087	2.22387	1.08505	0.325798	1.2481	0.805799	0.131882	1.3734	0.966099
ENSMUSP00000108236	ENSMUSG00000025260	Hsd17b10	A2AFQ2 "Hydroxysteroid (17-beta) dehydrogenase 10 "	0.4539	25	5	0.6458	17	9	0.7601	31	8	1.93262	0.00979409	1.48422	1.53651	0.023462	1.4257	1.44421	0.00012773	1.12141	0.925095	0.263074	1.1807	0.92513	0.177899	1.12918	1.06681	0.0452433	1.06489	1.35156	0.363715	2.26299	1.32063	0.00525589	1.18398	1.81116	0.0922726	2.05579	0.791163	0.0271227	1.21035	0.666327	0.000343414	1.17051	0.834912	0.181958	1.33373	0.930094
ENSMUSP00000032850	ENSMUSG00000030619	Eed	Q921E6 "Polycomb protein EED "	0.2393	22	6				0.3065	30	4	1.09662	0.0233282	1.0763				1.04899	0.800689	1.7367	1.02679	0.737623	1.21153				0.883627	0.0882678	1.17108	0.865627	0.470593	1.60887				1.61323	0.563869	10.5164	1.07264	0.508555	1.28836				1.16104	0.637747	2.48466	1.03495
ENSMUSP00000109979	ENSMUSG00000029106	Add1	Q9QYC0 "Alpha-adducin (Erythrocyte adducin subunit alpha)"	0.2231	44	3	0.1184	9	4	0.1673	19	3	0.830942	0.465465	2.43739	0.936895	0.659055	1.52977	0.71665	0.0942414	1.6069	0.73173	0.119898	1.66977	1.29487	0.239375	1.7535	0.974525	0.6883	1.27042	0.5019	0.147793	3.62455	0.835128	0.0166647	1.12529	0.810903	0.221186	1.67139	0.7053	0.262085	2.6421	0.738747	0.0323395	1.28992	0.626558	0.000399096	1.04102	0.725941
ENSMUSP00000041906	ENSMUSG00000033166	Dis3	Q9CSH3 "Exosome complex exonuclease RRP44 (EC 3.1.13.-)(Ribosomal RNA-processing protein 44)(Protein DIS3 homolog)"	0.2244	45	6	0.1534	23	5	0.4436	62	7	0.786744	0.198923	1.51685	0.784209	0.250902	1.65379	0.907884	0.00203418	1.04662	0.92428	0.425982	1.26328	1.01466	0.831264	1.19444	0.954082	0.16247	1.07492	0.813431	0.244798	1.49622	0.887232	0.27863	1.30368	0.933392	0.637767	1.40537	0.915679	0.744197	1.92828	0.993243	0.952019	1.34173	0.971104	0.682582	1.18184	0.816636
ENSMUSP00000045816	ENSMUSG00000036181	Hist1h1c	P15864 "Histone H1.2 (H1 VAR.1)(H1c)"	0.5991	54	3	0.6792	72	4	0.8066	68	2	1.06818	0.943628	34.9704	0.955117	0.960257	14.8938	1.3771	0.364932	13.7984	1.09826	0.932874	69.326	0.949688	0.834295	2.05527	1.36612	0.505096	56.1434	0.91999	0.939195	64.4089	0.782984	0.24733	1.72165	0.255641	0.414662	546814	0.951587	0.964453	69.7567	0.859468	0.85933	12.1537	0.636776	0.264385	12.5368	1.09198
ENSMUSP00000030684	ENSMUSG00000028869	Gnl2	Q99LH1 "Nucleolar GTP-binding protein 2 "	0.2555	50	6	0.25	28	10	0.294	37	4	1.18298	0.0892834	1.22792	1.15015	0.0538125	1.15341	1.11174	0.00518924	1.04688	1.16859	0.0908608	1.21121	1.13332	0.00241558	1.07026	0.836731	0.00395663	1.07269	1.257	0.0374683	1.23262	1.12209	0.0201591	1.09693	1.04979	0.905224	3.30293	1.19327	0.137456	1.29315	1.1114	0.124198	1.15131	0.997923	0.990151	1.63854	1.42068
ENSMUSP00000041149	ENSMUSG00000033307	Mif	P34884 "Macrophage migration inhibitory factor (MIF)(EC 5.3.2.1)(Phenylpyruvate tautomerase)(L-dopachrome tautomerase)(EC 5.3.3.12)(L-dopachrome isomerase)(Glycosylation-inhibiting factor)(GIF)(Delayed early response protein 6)(DER6)"	0.4174	18	4	0.5913	21	4	0.8087	28	4	1.06007	0.771564	1.79373	1.06112	0.812156	2.07075	1.13733	0.0369284	1.12069	1.0666	0.680298	1.57042	0.91873	0.146638	1.14855	1.27055	0.0027784	1.08705	1.023	0.958048	3.54908	0.870774	0.285282	1.4041	1.23483	0.614102	3.30976	1.34835	0.20738	1.81031	1.1898	0.236902	1.45521	1.25689	0.0310024	1.20818	0.915886
ENSMUSP00000090398	ENSMUSG00000069729	Arid1b	Q3UT39;Q6ZPV5;Q6ZWS9 "Putative uncharacterized protein Fragment ";"MKIAA1235 protein Fragment ";"Putative uncharacterized protein Fragment "	0.136	44	10	0.08827	27	5	0.1569	59	4	1.17197	0.0415941	1.16318	1.10669	0.249354	1.23243	1.24975	0.0245909	1.18388	0.904575	0.367163	1.26988	0.980185	0.553934	1.08993	0.995305	0.896502	1.1117	0.889364	0.378686	1.33171	0.732626	0.138836	1.59709	1.23606	0.240208	1.58668	0.880261	0.241402	1.25865	0.821696	0.0256788	1.17034	0.900476	0.225475	1.24512	0.91943
ENSMUSP00000095143	ENSMUSG00000008475	Arpc5	Q3UA72 "Actin-related protein 2/3 complex subunit 5 "	0.6954	20	5	0.6358	14	7	0.7351	21	8	0.961896	0.881034	1.96662	1.09703	0.411207	1.29256	0.89449	4.89651e-05	1.03038	0.840853	0.621686	2.46262	0.614062	0.000140167	1.14972	0.894576	0.00548702	1.06886	0.692813	0.327828	2.49627	0.825951	7.73057e-08	1.01529	1.23819	0.520047	2.10893	0.896453	0.607208	1.7242	1.05949	0.515956	1.22742	1.10667	0.393753	1.30189	0.81857
ENSMUSP00000120830	ENSMUSG00000024077	Strn	Q3TT86;Q3UWX9;Q5BKR9;Q8BKL4 "Putative uncharacterized protein Fragment ";"Putative uncharacterized protein Fragment ";"Striatin, calmodulin binding protein ";"Putative uncharacterized protein Fragment "	0.1782	33	6	0.06154	7	2	0.2321	33	3	0.569601	0.0567899	1.79808	0.660416	0.435557	73.6539	0.479434	0.104517	3.03985	0.97117	0.888065	1.6618	1.1003	0.710953	12.0418	0.89343	0.296935	1.41454	1.03722	0.904444	2.10463	0.915399	0.111872	1.2207	0.867422	0.630801	2.97233	0.991763	0.974043	1.8624	0.719745	0.0537172	1.42392	0.892151	0.336695	1.47957	0.967639
ENSMUSP00000025862	ENSMUSG00000024921	Smarca2	Q6DIC0 "Probable global transcription activator SNF2L2 (EC 3.6.1.-)(ATP-dependent helicase SMARCA2)(SNF2-alpha)(SWI/SNF-related matrix-associated actin-dependent regulator of chromatin subfamily A member 2)(Protein brahma homolog)(BRG1-associated factor 190B)(BAF190B)"	0.2546	99	5	0.1794	54	6	0.2824	87	1	0.735787	0.0917493	1.4705	0.745525	8.76072e-05	1.06793	0.713257			0.786847	0.0656788	1.30286	0.868212	0.000680816	1.04987	0.846255			0.74548	0.0353832	1.29822	0.842742	0.00593738	1.10076	0.591988			0.627405	0.0328467	1.48335	0.656327	0.000849396	1.1643	0.687953			0.79186
ENSMUSP00000032476	ENSMUSG00000003153	Slc2a3	P32037 "Solute carrier family 2, facilitated glucose transporter member 3 (Glucose transporter type 3, brain)(GLUT-3)"	0.1643	24	6	0.1014	9	3	0.2454	19	3	0.850063	0.136915	1.26609	1.09539	0.301024	1.32794	0.871838	0.325065	1.57811	0.972254	0.795914	1.30368	0.993837	0.815458	1.10537	1.24485	0.0223522	1.15409	1.49881	0.0868874	1.63144	1.6306	0.01229	1.26544	1.6455	0.00572464	1.17686	1.74414	0.00913848	1.41452	1.55835	0.0221728	1.3352	1.71155	0.00759475	1.22468	1.36319
ENSMUSP00000020637	ENSMUSG00000020368	Canx	P35564 "Calnexin Precursor "	0.1895	23	6	0.1743	14	5	0.2843	27	3	1.51321	0.020492	1.37521	1.53624	0.0149884	1.33841	1.47149	0.00212932	1.07985	1.15108	0.294292	1.36188	1.07547	0.131137	1.11253	1.1478	0.0450823	1.13927	1.53506	0.0408956	1.49548	1.61431	0.00287351	1.22656	1.4196	0.426576	4.58655	1.38632	0.0328137	1.33255	1.56529	0.0113148	1.32314	1.31695	0.0754637	1.41242	1.62915
ENSMUSP00000061474	ENSMUSG00000028911	Sfrs4	Q8VE97 "Splicing factor, arginine/serine-rich 4 "	0.4807	35	3	0.2953	29	1	0.6029	51	0	1.31401	0.311933	2.40198	1.20197						1.12995	0.594986	2.31449	1.10953						1.20955	0.468625	2.51646	1.0221						1.27925	0.34679	2.38355	1.09967						1.26546
ENSMUSP00000107963	ENSMUSG00000055817	Mta3	Q3TY62 "Putative uncharacterized protein "	0.3959	57	5				0.5307	72	3	1.00638	0.95749	1.36488				1.01089	0.688847	1.1059	0.973102	0.840591	1.42297				1.06214	0.249987	1.17558	0.919435	0.502563	1.37274				1.12201	0.77374	4.51784	1.00909	0.908733	1.22837				0.940566	0.649465	1.64561	0.879281
ENSMUSP00000051845	ENSMUSG00000034154	Ino80	Q6ZPV2 "Putative DNA helicase INO80 complex homolog 1 (EC 3.6.1.-)"	0.2264	73	6	0.07697	23	2	0.2745	81	1	0.921028	0.410961	1.266	0.878421	0.0541075	1.15065	0.993058			0.938546	0.436129	1.21256	0.995978	0.730391	1.12031	0.925729			0.880863	0.386972	1.41096	0.925962	0.110602	1.18712	0.701879			0.893724	0.17793	1.20246	0.907817	0.609139	5.71695	0.88608			0.870656
ENSMUSP00000076818	ENSMUSG00000058905	AC164607.1	AC164607.1 AC164607.1-201 "null" "Clone_based_vega_transcript"	0.6861	24	4	0.4307	9	4				1.28383	0.525957	3.03774	1.5992	0.00842801	1.27214				0.961258	0.917267	3.04645	1.05369	0.0195023	1.03697				1.24828	0.581697	3.14638	1.39493	0.000589613	1.07098				0.957929	0.915355	3.26827	1.23773	0.0176508	1.1534				1.12811
ENSMUSP00000101413	ENSMUSG00000040761	Spen	Q62504 "Msx2-interacting protein (SPEN homolog)(SMART/HDAC1-associated repressor protein)"	0.1246	99	7							0.948141	0.518579	1.20934							1.02053	0.832107	1.25185							0.947246	0.551945	1.23432							0.924165	0.569585	1.37836							1.03439
ENSMUSP00000117068	ENSMUSG00000051506	Wdfy4	Q3U2N8;Q69ZF2 "Putative uncharacterized protein Fragment ";"MKIAA1607 protein Fragment "	0.1836	71	6	0.08462	24	4				0.786817	0.00076823	1.08845	0.704814	0.0301922	1.33164				0.96238	0.653629	1.22971	0.879444	0.0216266	1.09712				0.829287	0.0200539	1.15388	0.864793	0.190726	1.3158				0.901477	0.134035	1.16096	0.735907	0.0256977	1.26627				0.793842
ENSMUSP00000018577	ENSMUSG00000018433	Nol11	Q8BJW5 "Nucleolar protein 11 "	0.1701	33	6	0.1452	14	7	0.3361	40	4	0.967244	0.861583	1.59444	0.994424	0.935685	1.17658	1.04435	0.143224	1.07254	0.918551	0.615855	1.50471	1.0262	0.632269	1.13381	0.80327	0.00175888	1.0675	0.867343	0.397702	1.48563	0.98176	0.693613	1.11509	1.00341	0.992069	2.731	0.931235	0.648228	1.45896	0.973226	0.749689	1.21992	1.07624	0.18222	1.14477	0.961669
ENSMUSP00000116492	ENSMUSG00000025967	Eef1b2	O70251 "Elongation factor 1-beta (EF-1-beta)"	0.3378	17	6	0.6044	16	9	0.8356	29	9	0.708212	0.0514702	1.41666	0.808499	0.2695	1.51162	1.48519	0.000521331	1.17753	0.818607	0.227885	1.45436	0.630173	4.90281e-07	1.07598	0.85723	0.00528754	1.09818	0.68827	0.00286605	1.19339	0.798964	0.000935844	1.10692	0.777409	0.550632	2.53956	0.896349	0.0716689	1.13142	0.976375	0.887899	1.46063	0.990232	0.969677	1.78102	0.731383
ENSMUSP00000025246	ENSMUSG00000024387	Csnk2b	P67871 "Casein kinase II subunit beta (CK II beta)(Phosvitin)"	0.3767	16	2	0.1674	5	1	0.5953	13	1	1.20633	0.265549	2.87527	1.03215			0.958205			1.12961	0.649543	12.4644	1.09678			1.02245			0.917387	0.629108	5.27396	1.29224			1.1743			1.34266	0.344703	9.50313	1.33414			1.13767			1.24063
ENSMUSP00000005620	ENSMUSG00000005483	Dnajb1	Q9QYJ3 "DnaJ homolog subfamily B member 1 (Heat shock 40 kDa protein 1)(Heat shock protein 40)(HSP40)"	0.2853	21	5	0.1853	8	1	0.3382	22	1	0.852271	0.164179	1.29808	0.767794			0.820199			1.00911	0.959073	1.58607	1.06255			1.39727			0.90394	0.448167	1.39618	1.00402			0.869521			0.795513	0.166584	1.4566	0.740434			0.681332			0.963059
ENSMUSP00000086987	ENSMUSG00000057278	Snrpg	P62309 "Small nuclear ribonucleoprotein G (snRNP-G)(Sm protein G)(Sm-G)(SmG)"	0.5921	14	3	0.6974	16	4	0.9342	16	2	1.01569	0.848976	1.36357	0.813233	0.124751	1.3648	0.946774	0.186078	1.23259	0.942276	0.750968	2.02092	1.00588	0.851304	1.09576	0.934876	0.232273	1.38654	0.807899	0.238519	1.73758	0.910957	0.508323	1.48629	1.05587	0.630625	2.86853	0.978722	0.867073	1.62897	0.818795	0.0379069	1.19585	1.06442	0.00410607	1.00513	1.04123
ENSMUSP00000061227	ENSMUSG00000025791	Pgm2	Q9D0F9 "Phosphoglucomutase-1 (PGM 1)(EC 5.4.2.2)(Glucose phosphomutase 1)"	0.2829	37	4							1.22915	0.169383	1.43963							1.01477	0.791672	1.1755							1.0627	0.147966	1.10499							1.16937	0.0473822	1.16538							0.953394
ENSMUSP00000093426	ENSMUSG00000071337	Tia1	010 "cytotoxic granule-associated RNA binding protein 1 Gene [Source:MGI (curated);Acc:MGI:107914]" "MGI_curated_transcript"	0.226	18	3	0.2078	13	2				0.978017	0.631763	1.18621	0.812083	0.157758	1.95257				1.24162	0.106307	1.39179	1.12896	0.329373	2.40392				1.20978	0.451378	2.41826	0.977434	0.931231	14.502				1.2563	0.170223	1.5951	0.95631	0.722043	3.37495				1.32088
ENSMUSP00000048450	ENSMUSG00000033931	Rbm34	Q8C5L7 "RNA-binding protein 34 (RNA-binding motif protein 34)"	0.2964	30	7	0.3009	22	2	0.2986	26	2	1.08619	0.757633	1.87065	0.995186	0.977843	5.81797	0.927202	0.147494	1.25429	1.05347	0.853261	1.93514	1.10063	0.423591	2.60151	1.02971	0.873901	6.38179	1.23365	0.500717	2.10473	1.04177	0.505791	1.69816	1.29923	0.115283	1.83854	1.15712	0.623531	1.99463	0.957021	0.720424	3.28132	1.26098	0.0481324	1.25006	1.3063
ENSMUSP00000094164	ENSMUSG00000071757	Zhx2	Q8C0C0 "Zinc fingers and homeoboxes protein 2 (Zinc finger and homeodomain protein 2)(Alpha-fetoprotein regulator 1)(AFP regulator 1)(Regulator of AFP)"	0.1926	34	5	0.1459	16	4	0.2356	36	1	0.759345	0.00242502	1.11869	0.762719	0.103069	1.44988	0.779965			0.844303	0.00857596	1.10257	0.953678	0.243822	1.10997	1.04442			0.851805	0.0888991	1.22022	0.875212	0.0670072	1.1626	1.03589			0.879831	0.0158504	1.09241	0.816114	0.223346	1.52564	0.952269			0.836737
ENSMUSP00000036277	ENSMUSG00000037461	Ints7	Q7TQK1 "Integrator complex subunit 7 (Int7)"	0.2671	52	8	0.207	26	9	0.3333	51	8	0.972401	0.537206	1.10742	0.92266	0.156687	1.1261	1.00353	0.922627	1.08625	0.963367	0.574491	1.16172	1.03613	0.842182	1.48878	0.980477	0.858327	1.28631	0.980618	0.73579	1.14089	0.978173	0.615721	1.10237	0.912803	0.592641	1.4696	0.938186	0.488275	1.22914	0.898386	0.0526698	1.11486	1.01845	0.755838	1.14302	0.938557
ENSMUSP00000048802	ENSMUSG00000020677	Ddx52	Q8K301 "Probable ATP-dependent RNA helicase DDX52 (EC 3.6.1.-)(DEAD box protein 52)(ATP-dependent RNA helicase ROK1-like)"	0.2659	40	4	0.1154	9	4	0.5452	49	6	1.24499	0.00542521	1.10103	1.22877	0.0143303	1.13625	1.19518	0.00121333	1.0721	0.900275	0.262458	1.27492	0.965526	0.103206	1.04932	0.860189	0.000904003	1.05669	0.986063	0.88431	1.32604	0.946287	0.399042	1.19617	1.00367	0.981987	1.48725	1.08214	0.500253	1.38905	1.08341	0.098827	1.11374	1.02131	0.678573	1.13122	1.13174
ENSMUSP00000025786	ENSMUSG00000024855	Pacs1	Q8K212 "Phosphofurin acidic cluster sorting protein 1 (PACS-1)"	0.2268	53	7				0.2914	43	3	1.12686	0.300509	1.29432				1.30751	0.232304	1.97582	0.921102	0.261151	1.17602				1.07492	0.773812	2.57716	1.08242	0.360959	1.21653				0.959796	0.896562	3.32206	0.937729	0.554415	1.28576				0.870926	0.584207	2.50863	0.966424
ENSMUSP00000023867	ENSMUSG00000023104	Rfc2	Q9WUK4 "Replication factor C subunit 2 (Activator 1 subunit 2)(Replication factor C 40 kDa subunit)(RF-C 40 kDa subunit)(RFC40)(Activator 1 40 kDa subunit)(A1 40 kDa subunit)"	0.447	24	5	0.2636	15	6	0.6533	36	9	1.04069	0.649732	1.25347	1.00811	0.923939	1.22967	1.06974	0.214264	1.12213	0.928649	0.354907	1.21725	0.967614	0.0127676	1.02259	0.990959	0.761717	1.06902	0.8653	0.229817	1.32805	0.820549	0.0626137	1.23741	1.24961	0.0972013	1.31471	0.861147	0.223372	1.33409	0.911892	0.295546	1.22515	0.930694	0.0306339	1.06525	0.916836
ENSMUSP00000025292	ENSMUSG00000024422	Dhx16	Q05BH3;Q921Y1;Q9CRI3 "Dhx16 protein ";"DEAH (Asp-Glu-Ala-His) box polypeptide 16 ";"Putative uncharacterized protein Fragment "	0.2567	55	7	0.1619	31	6	0.2845	63	2	0.938115	0.360016	1.17089	0.813041	0.0177818	1.16555	1.00906	0.231237	1.04451	0.856792	0.119903	1.23207	1.03299	0.248588	1.066	0.834234	0.0138887	1.05153	1.12034	0.3866	1.347	1.01238	0.812128	1.13461	0.965394	0.708002	2.47496	0.920128	0.477381	1.30848	0.816285	0.00666993	1.12428	0.923441	0.497181	2.7267	1.02027
ENSMUSP00000004478	ENSMUSG00000004364	Cul3	Q9JLV5 "Cullin-3 (CUL-3)"	0.2565	48	7	0.1719	18	6	0.3984	57	5	1.42253	0.00529662	1.22415	1.65147	0.0108562	1.38621	1.39293	0.00729671	1.20039	0.860713	0.0194989	1.12305	0.705229	6.37961e-05	1.07596	0.844711	0.00639309	1.09375	0.79604	0.002478	1.11837	0.97826	0.715451	1.1577	1.2008	0.427685	1.77904	0.993413	0.923664	1.17569	1.19128	0.19999	1.35648	1.06404	0.546514	1.29939	0.794717
ENSMUSP00000103943	ENSMUSG00000040720	1110037F02Rik	Q8CFK9 "1110037F02Rik protein "	0.1655	71	7	0.08544	29	5	0.317	97	7	0.869856	0.00372478	1.07714	0.966962	0.746548	1.30903	0.995816	0.880579	1.06763	0.899527	0.0864756	1.13486	0.914489	0.0242286	1.07282	0.896982	0.070851	1.12902	0.967481	0.584762	1.15044	0.912219	0.121271	1.13882	1.32645	0.120386	1.46532	0.85254	0.0033473	1.08672	0.905104	0.085903	1.12979	1.09801	0.160814	1.15377	0.927509
ENSMUSP00000021850	ENSMUSG00000021413	Prpf4b	Q61136 "Serine/threonine-protein kinase PRP4 homolog (EC 2.7.11.1)(PRP4 pre-mRNA-processing factor 4 homolog)(Pre-mRNA protein kinase)"	0.2274	54	7	0.2026	27	5	0.3952	75	4	1.01871	0.832984	1.2287	0.918019	0.48728	1.36434	0.842725	0.0159952	1.11676	1.25909	0.254229	1.5639	0.993657	0.826739	1.07854	0.898334	0.217159	1.24483	1.3267	0.113597	1.45306	0.991839	0.663315	1.04967	1.08161	0.535953	1.43067	1.22876	0.281492	1.5312	0.869369	0.274707	1.35977	0.903044	0.322124	1.31572	1.40183
ENSMUSP00000007708	ENSMUSG00000007564	Ppp2r1a	Q76MZ3 "Serine/threonine-protein phosphatase 2A 65 kDa regulatory subunit A alpha isoform (PP2A subunit A isoform PR65-alpha)(PP2A subunit A isoform R1-alpha)"	0.2632	31	3	0.2088	17	6	0.4822	44	9	1.04222	0.203884	1.10037	1.04378	0.733829	1.35843	1.1279	0.00283679	1.06765	1.07902	0.228129	1.20998	0.981276	0.657932	1.10885	1.00713	0.83843	1.08093	1.13799	0.495034	1.95872	1.02515	0.696705	1.1672	1	1	1.98287	1.01876	0.779502	1.2843	0.989911	0.933842	1.34813	0.96883	0.876769	1.57791	1.10067
ENSMUSP00000031411	ENSMUSG00000029455	Aldh2	P47738 "Aldehyde dehydrogenase, mitochondrial Precursor (EC 1.2.1.3)(ALDH class 2)(AHD-M1)(ALDHI)(ALDH-E2)"	0.2659	30	6				0.3276	31	3	1.06876	0.460535	1.2386				1.08659	0.0325719	1.06835	1.29237	0.00014839	1.06612				1.12095	0.0586129	1.13257	0.909284	0.384644	1.29269				0.729638	0.275682	2.4916	1.07143	0.443633	1.23784				0.961453	0.635512	1.35741	1.24263
ENSMUSP00000110532	ENSMUSG00000052146	Rps10	P63325 "40S ribosomal protein S10 "	0.6061	16	5	0.4909	13	4	0.7455	27	5	1.12018	0.4805	1.49991	1.50997	0.159072	2.02015	1.15455	0.210152	1.30671	1.06795	0.723434	1.61697	1.02673	0.362002	1.08137	1.14312	0.168151	1.24726	1.1169	0.132022	1.1765	1.2499	0.107011	1.36536	1.10166	0.801083	2.7137	1.14311	0.326399	1.39414	1.26768	0.139571	1.45894	1.31595	0.237136	1.73097	1.10551
ENSMUSP00000105163	ENSMUSG00000034361	Cpne2	002 "copine II Gene [Source:MGI (curated);Acc:MGI:2387578]" "MGI_curated_transcript"	0.2303	24	4	0.2029	19	5	0.2596	22	5	0.642174	0.00321237	1.17618	0.541611	0.0065584	1.38812	0.716381	0.0130679	1.24287	0.884858	0.0176495	1.08529	0.979589	0.847431	1.32177	1.13979	0.32637	1.38408	0.789763	0.00307104	1.08888	0.872588	0.0437612	1.13894	0.815774	0.401289	1.82671	0.95556	0.133774	1.0734	0.768736	0.00398386	1.13037	0.922717	0.718577	1.78104	0.767712
ENSMUSP00000114968	ENSMUSG00000027998	Plrg1	NP_058064.2 "pleiotropic regulator 1 "	0.3119	34	5	0.1735	11	5	0.2846	25	8	1.18005	0.0516097	1.18222	0.837765	0.0110812	1.11623	0.946351	0.00266818	1.02914	1.11395	0.274716	1.26733	1.0041	0.940946	1.15508	1.01155	0.623526	1.05434	1.2121	0.0627474	1.2321	0.975968	0.464141	1.08711	1.11218	0.636065	1.66271	1.12333	0.332286	1.34038	0.874225	0.0400626	1.13259	1.07238	0.320547	1.16719	1.14439
ENSMUSP00000036949	ENSMUSG00000041959	S100a10	P08207 "Protein S100-A10 (S100 calcium-binding protein A10)(Calpactin-1 light chain)(Calpactin I light chain)(p10 protein)(p11)(Cellular ligand of annexin II)"	0.4639	10	5	0.4433	7	3				0.836796	0.571432	2.23314	1.15254	0.255762	1.47354				0.760399	0.527362	3.00359	0.947883	0.461208	1.29				0.927949	0.852234	2.84354	1.23144	0.0104542	1.09671				1.14553	0.740382	2.89182	0.780259	0.0593719	1.31317				0.902028
ENSMUSP00000048383	ENSMUSG00000034311	Kif4	P33174 "Chromosome-associated kinesin KIF4 (Chromokinesin)"	0.2169	71	7	0.1917	44	11	0.3509	71	12	0.96171	0.897344	2.03373	1.00139	0.988776	1.23897	1.0832	0.000647333	1.03811	0.969557	0.911481	1.9203	0.877665	0.017478	1.1077	0.911942	0.032756	1.08666	0.831282	0.246265	1.42186	0.75319	0.00626954	1.20113	0.775157	0.0953588	1.35972	0.987869	0.927529	1.37013	1.00908	0.875654	1.13362	0.893489	0.171039	1.18443	1.01806
ENSMUSP00000086027	ENSMUSG00000067873	Htatsf1	Q8BGC0 "HIV Tat-specific factor 1 homolog "	0.288	38	2	0.1017	11	3				1.40794	0.348419	14.1409	0.648687	0.0685614	1.67278				1.10803	0.378771	2.41597	1.19139	0.0772124	1.24918				1.34774	0.239609	4.47536	0.947269	0.599127	1.45745				0.876001	0.553534	7.32868	0.669021	0.0424396	1.44502				1.3158
ENSMUSP00000022909	ENSMUSG00000022300	Dcaf13	Q6PAC3 "DDB1- and CUL4-associated factor 13 (WD repeat and SOF domain-containing protein 1)"	0.2921	26	6	0.1573	11	4	0.2674	26	2	0.956712	0.641285	1.25814	1.16632	0.0154967	1.10313	1.11127	0.0851927	1.19778	0.931748	0.525171	1.30506	1.0364	0.435345	1.13506	0.764092	0.0714864	1.47037	1.03159	0.764654	1.30918	1.01801	0.401829	1.06004	0.986725	0.966589	25.3435	0.992745	0.947383	1.30981	1.14594	0.00455722	1.05793	1.02811	0.828581	3.58362	1.00737
ENSMUSP00000095025	ENSMUSG00000062078	Qk	Q9QYS9 "Protein quaking (MqkI)(qkI)"	0.3417	17	3	0.2132	11	2	0.5543	30	6	1.43663	0.147769	1.96741	1.61672	0.430362	133.74	1.1818	0.026372	1.14777	1.27579	0.415191	2.79535	1.22	0.546335	18.615	1.08229	0.0452429	1.07963	1.06847	0.688706	1.84993	1.0916	0.737036	12.689	0.982085	0.956005	2.22888	1.19397	0.507563	2.59451	1.1778	0.536519	10.3055	0.995992	0.980232	1.48655	1.06221
ENSMUSP00000106969	ENSMUSG00000040549	Ckap5	002 "cytoskeleton associated protein 5 Gene [Source:MGI (curated);Acc:MGI:1923036]" "MGI_curated_transcript"	0.1939	109	5	0.1378	45	10	0.247	97	3	1.50272	0.152038	1.89644	0.990462	0.886459	1.15904	0.922628	0.0863931	1.11522	1.18701	0.539833	2.03567	0.765578	0.00154714	1.14462	0.708137	0.0923889	1.62533	1.53248	0.210585	2.21571	0.826236	0.0026898	1.11115	0.76879	0.21612	1.88459	1.18169	0.549269	2.03297	0.713622	1.51661e-05	1.09528	0.849067	0.225711	1.50213	1.47311
ENSMUSP00000073261	ENSMUSG00000064068	Mtx1	P47802 "Metaxin-1 (Mitochondrial outer membrane import complex protein 1)"	0.2965	20	5	0.1451	7	2	0.4227	21	4	1.05024	0.567141	1.24416	0.994335	0.974537	6.07191	0.655338	0.0143809	1.30001	0.959837	0.623819	1.23922	1.12687	0.0648304	1.16775	1.06763	0.446961	1.2694	1.17859	0.209685	1.3573	1.24124	0.00553838	1.02418	0.731986	0.152694	1.68338	1.02563	0.872449	1.50779	1.08769	0.632207	5.146	0.905044	0.541088	1.58677	1.0006
ENSMUSP00000109521	ENSMUSG00000026816	Gtf3c5	Q8R2T8 "General transcription factor 3C polypeptide 5 (Transcription factor IIIC subunit epsilon)(TF3C-epsilon)(Transcription factor IIIC 63 kDa subunit)(TFIIIC 63 kDa subunit)(TFIIIC63)"	0.275	42	6	0.15	15	5	0.2038	25	2	1.10489	0.312121	1.25633	0.97066	0.867909	1.59414	1.03703	0.344794	1.32044	1.06559	0.515168	1.26281	1.02153	0.785795	1.22561	0.9456	0.307595	1.45191	1.06542	0.416388	1.20196	0.960305	0.464398	1.14931	1.34658	0.542795	75.695	0.996103	0.970915	1.29949	0.907267	0.155073	1.16696	1.06486	0.855784	31.9575	1.06318
ENSMUSP00000103362	ENSMUSG00000038909	Myst2	Q5SVQ0 "Histone acetyltransferase MYST2 (MYST-2)(EC 2.3.1.48)(MOZ, YBF2/SAS3, SAS2 and TIP60 protein 2)(Histone acetyltransferase binding to ORC1)"	0.2586	32	7	0.09493	7	2				0.761955	0.0186951	1.23141	0.752685	0.0424492	1.2726				0.801675	0.0502481	1.24781	0.913707	0.120644	1.246				0.862374	0.235315	1.31616	0.893388	0.327078	2.24418				0.827412	0.138123	1.31142	0.831725	0.176377	1.94592				0.80092
ENSMUSP00000083271	ENSMUSG00000032116	Stt3a	P46978 "Dolichyl-diphosphooligosaccharide--protein glycosyltransferase subunit STT3A (Oligosaccharyl transferase subunit STT3A)(STT3-A)(EC 2.4.1.119)(B5)(Integral membrane protein 1)"	0.2045	34	4	0.1275	16	3	0.2895	44	3	1.10245	0.820077	3.49371	1.11507	0.454275	1.66338	1.14788	0.0157913	1.07839	0.929625	0.880083	4.11643	1.03798	0.508167	1.22235	1.22452	0.31429	1.92356	1.11173	0.882868	15.372	1.22417	0.0478658	1.21845	2.51563	0.142427	5.38475	1.12867	0.795921	3.90914	1.2466	0.13682	1.48036	1.59699	0.0854019	1.87712	1.20515
ENSMUSP00000078037	ENSMUSG00000022325	Pop1	Q9D4G5 "Putative uncharacterized protein "	0.1921	47	6	0.1202	19	6	0.3054	58	3	0.768367	0.00293104	1.13353	0.759658	0.0635671	1.34661	0.755214	0.0759353	1.42384	0.90438	0.066587	1.11689	0.85759	0.0281356	1.13783	0.828151	0.206933	1.55374	0.992712	0.906429	1.1643	0.987118	0.844842	1.17556	0.998212	0.990859	1.81419	0.886801	0.117687	1.17775	0.95241	0.575341	1.23284	0.990451	0.907678	1.37007	1.00053
ENSMUSP00000111297	ENSMUSG00000024456	Diap1	O08808 "Protein diaphanous homolog 1 (Diaphanous-related formin-1)(DRF1)(p140mDIA)(mDIA1)"	0.1701	46	5	0.1108	21	3	0.3631	84	10	1.37827	0.14159	1.62785	1.55876	0.0968811	1.90057	1.41938	2.05973e-05	1.10311	1.20219	0.326088	1.57956	1.10869	0.308238	1.3878	1.26877	2.85418e-05	1.07196	0.845552	0.479168	1.93915	1.06837	0.3334	1.25235	1.28764	0.213862	1.53348	0.940617	0.65238	1.47811	1.09164	0.415194	1.44783	0.895668	0.420747	1.34373	0.970811
ENSMUSP00000111644	ENSMUSG00000059252	AC160125.1	AC160125.1 AC160125.1-201 "null" "Clone_based_ensembl_transcript"	0.3855	24	5	0.3605	17	6	0.7733	23	4	1.54936	0.095839	1.751	1.58224	0.0635161	1.64313	1.17707	0.0559158	1.18614	1.66893	0.133023	2.12892	0.975665	0.508947	1.09319	1.01139	0.890201	1.27125	1.42309	0.165592	1.78305	1.16202	0.0783352	1.1911	1.22029	0.87124	36.3079	2.04153	0.0357746	1.88981	1.70989	0.0313762	1.59251	0.883418	0.800219	4.16721	1.69788
ENSMUSP00000101514	ENSMUSG00000003644	Rps6ka1	Q3TIM6;Q3UFZ5;Q505N6;Q810V8;Q9Z278 "Putative uncharacterized protein ";"Putative uncharacterized protein ";"Ribosomal protein S6 kinase polypeptide 1Rps6ka1 protein ;";"Rps6ka1 protein Fragment ";"Ribosomal protein S6 kinase Fragment "	0.3122	52	6	0.09796	13	3	0.2694	31	2	0.687721	0.0435639	1.43117	0.647955	0.0898181	1.82368	0.901581	0.334761	2.14678	0.899121	0.116923	1.15538	0.916081	0.316824	1.32986	1.26224	0.437565	11.3469	0.843633	0.0560559	1.19304	1.10086	0.111225	1.16274	0.627159	0.0103152	1.10083	0.931817	0.386239	1.21087	1.05106	0.658663	1.51773	0.914808	0.384893	2.18506	1.0126
ENSMUSP00000067858	ENSMUSG00000064302	Clasp1	Q80TV8 "CLIP-associating protein 1 (Cytoplasmic linker-associated protein 1)"	0.2143	82	7							1.08194	0.463101	1.27882							1.0502	0.706634	1.35466							1.03849	0.66663	1.22644							1.02406	0.811458	1.26284							0.977518
ENSMUSP00000093719	ENSMUSG00000071532	AC118202.1	AC118202.1 AC118202.1-201 "null" "Clone_based_ensembl_transcript"	0.4487	19	7	0.5513	15	6	0.6923	18	3	1.23551	0.158655	1.3887	1.24096	0.0968887	1.31272	0.991035	0.560199	1.05755	1.04258	0.751908	1.37847	1.07075	0.0208835	1.05427	0.919371	0.035624	1.07268	1.26753	0.431265	2.0387	0.915751	0.605574	1.50822	0.917809	0.721816	2.46218	1.15845	0.537209	1.77029	1.21766	0.0297222	1.18312	1.21816	0.0457246	1.20694	1.43599
ENSMUSP00000085650	ENSMUSG00000048874	Phf3	A0PJJ1;B2RQG2;Q4FZG1;Q80U54;Q8BLA7;Q8BU94;Q9CV03 "Phf3 protein Fragment ";"PHD finger protein 3 ";"Phf3 protein Fragment ";"MKIAA0244 protein Fragment ";"Putative uncharacterized protein ";"Putative uncharacterized protein Fragment ";"Putative uncharacterized protein Fragment "	0.1842	81	5	0.07309	26	3	0.2306	88	5	0.767651	0.237937	1.6981	0.806322	0.136579	1.46625	0.896861	0.0332815	1.09943	0.757917	0.185407	1.61879	0.82842	0.12823	1.3797	0.868518	0.00872468	1.08516	0.823812	0.0503375	1.21439	0.851234	0.0442724	1.16287	1.06441	0.744019	1.64078	0.831201	0.148376	1.33258	0.892086	0.300837	1.42662	1.04775	0.645238	1.29761	0.686204
ENSMUSP00000104813	ENSMUSG00000027544	Nfatc2	Q60591 "Nuclear factor of activated T-cells, cytoplasmic 2 (NF-ATc2)(NFATc2)(T-cell transcription factor NFAT1)(NFAT pre-existing subunit)(NF-ATp)"	0.2233	26	5	0.1726	22	6	0.1737	43	1	0.978697	0.91521	1.80807	1.05631	0.414766	1.1717	1.29313			0.876822	0.205455	1.29635	1.06789	0.293885	1.15495	1.08			0.996612	0.986189	1.7769	1.13129	0.0665584	1.14529	1.00433			0.939564	0.681233	1.54926	0.878376	0.0974999	1.17803	1.13927			1.00337
ENSMUSP00000033609	ENSMUSG00000031256	Cstf2	Q8BIQ5 "Cleavage stimulation factor subunit 2 (Cleavage stimulation factor 64 kDa subunit)(CSTF 64 kDa subunit)(CstF-64)(CF-1 64 kDa subunit)"	0.2793	28	4	0.331	23	6	0.6034	58	6	0.913434	0.0706751	1.11041	0.889231	0.0917764	1.15597	1.04107	0.122032	1.05722	0.926712	0.348367	1.24408	1.08765	0.0577197	1.09205	1.24322	0.000323031	1.06606	0.894318	0.230018	1.26689	0.93996	0.220619	1.12049	0.868695	0.729568	2.69037	0.803347	0.0547023	1.25508	0.873343	0.0361147	1.13028	0.836153	0.437837	1.72623	0.857115
ENSMUSP00000027111	ENSMUSG00000025968	Ndufs1	Q91VD9 "NADH-ubiquinone oxidoreductase 75 kDa subunit, mitochondrial Precursor (EC 1.6.5.3)(EC 1.6.99.3)(Complex I-75kD)(CI-75kD)"	0.2393	31	8	0.2242	20	11	0.3645	41	4	1.24392	0.0295349	1.20853	1.31471	0.0587803	1.33093	1.01303	0.887089	1.30568	1.00299	0.962392	1.15526	1.08695	0.217917	1.15176	1.16569	0.054674	1.17239	1.26222	0.0195131	1.20039	1.38594	0.0028497	1.20362	1.22912	0.250593	1.58752	1.15832	0.191525	1.27181	1.19179	0.0300404	1.16732	1.36385	0.0043116	1.1341	1.0043
ENSMUSP00000105144	ENSMUSG00000027651	Rprd1b	002 "regulation of nuclear pre-mRNA domain containing 1B Gene [Source:MGI (curated);Acc:MGI:1917720]" "MGI_curated_transcript"	0.2993	20	6	0.3163	11	6	0.3877	12	5	1.14281	0.59416	1.8285	1.13973	0.305419	1.34261	1.08154	0.0956171	1.10539	1.13911	0.649119	1.99867	1.09987	0.00858915	1.06018	0.998781	0.984524	1.1783	1.22224	0.331871	1.61669	1.15143	0.0112463	1.09704	1.08664	0.769493	2.08653	1.22084	0.432262	1.82385	1.09677	0.339361	1.25223	0.980522	0.82955	1.26828	1.09099
ENSMUSP00000108308	ENSMUSG00000026377	Mki67ip	Q91VE6 "MKI67 FHA domain-interacting nucleolar phosphoprotein (Nucleolar protein interacting with the FHA domain of pKI-67)(mNIFK)"	0.3754	28	6	0.4201	12	6	0.3375	17	5	1.12572	0.637705	1.83643	0.943697	0.293699	1.13546	1.16228	0.0279571	1.13173	0.851872	0.623458	2.19996	0.987171	0.641348	1.06931	0.762266	0.0510912	1.31455	1.11454	0.675826	1.87466	1.05767	0.622911	1.31695	1.31595	0.00186557	1.10994	1.07313	0.800193	1.9735	1.05659	0.253156	1.11586	1.37844	0.0318313	1.3171	1.07396
ENSMUSP00000004054	ENSMUSG00000022905	Kpna1	Q60960 "Importin subunit alpha-1 (Karyopherin subunit alpha-1)(SRP1-beta)(RAG cohort protein 2)(Nucleoprotein interactor 1)(NPI-1)(Importin alpha-S1)"	0.184	25	4	0.1171	9	2	0.3662	32	7	0.808747	0.340277	1.81698	0.938864	0.820485	15.9086	0.886879	0.203444	1.22855	0.858172	0.592574	2.25975	1.0496	0.285901	1.34502	0.91535	0.0139744	1.06336	0.968041	0.929754	2.9428	1.17642	0.128542	1.52592	1.13258	0.474106	1.49033	0.954801	0.862374	2.18139	1.04865	0.816103	7.62082	1.12651	0.23049	1.24416	1.01676
ENSMUSP00000041049	ENSMUSG00000035754	Wdr18	Q4VBE8 "WD repeat-containing protein 18 "	0.2784	21	5	0.1531	8	5	0.4037	23	6	0.904925	0.0972791	1.13724	0.926391	0.308236	1.19957	0.984463	0.632349	1.08229	0.982187	0.667536	1.11382	1.10356	0.0535185	1.10619	0.95396	0.0623755	1.05201	0.933263	0.431133	1.24509	0.980074	0.826864	1.27039	0.795925	0.610663	2.94876	0.962236	0.613547	1.21581	1.00232	0.973387	1.19869	0.807867	0.256018	1.53393	1.10263
ENSMUSP00000112089	ENSMUSG00000037896	Rcor1	Q8CFE3 "REST corepressor 1 (Protein CoREST)"	0.3061	23	6	0.283	16	6	0.3312	25	6	1.10331	0.267338	1.22454	0.930727	0.352359	1.19729	0.981934	0.600668	1.08757	1.02466	0.77439	1.22996	1.01639	0.739577	1.12632	1.03352	0.305833	1.07717	1.06147	0.325604	1.15116	1.02376	0.660049	1.13797	1.19506	0.371005	1.59415	1.12716	0.213314	1.24095	0.973648	0.654863	1.15554	1.1377	0.174708	1.23342	1.00763
ENSMUSP00000064261	ENSMUSG00000028678	Kif2c	Q922S8 "Kinesin-like protein KIF2C (Mitotic centromere-associated kinesin)(MCAK)"	0.2538	40	5	0.1734	21	4	0.3481	47	2	1.05301	0.76747	1.57315	0.840692	0.172525	1.3629	0.925591	0.115708	1.19789	1.16365	0.370507	1.51805	0.878044	0.106258	1.19837	0.817061	0.0883344	1.43119	0.982318	0.927906	1.67234	0.81196	0.152919	1.41622	0.73164	0.783297	73826.2	1.08402	0.716175	1.77484	0.91553	0.264378	1.22761	0.863198	0.712247	46.9858	1.16529
ENSMUSP00000029266	ENSMUSG00000027712	Anxa5	P48036 "Annexin A5 (Annexin-5)(Annexin V)(Lipocortin V)(Endonexin II)(Calphobindin I)(CBP-I)(Placental anticoagulant protein I)(PAP-I)(Placental anticoagulant protein 4)(PP4)(Thromboplastin inhibitor)(Vascular anticoagulant-alpha)(VAC-alpha)(Anchorin CII)"	0.3699	30	5	0.2884	12	9	0.4451	22	7	1.8032	0.020901	1.557	1.87206	0.00162366	1.36383	2.05269	0.000111767	1.2185	1.18049	0.105369	1.24716	1.53111	0.00407835	1.28018	1.21562	0.000518594	1.07343	1.26898	0.060962	1.29143	1.22745	0.00536726	1.13307	1.22815	0.223651	1.44863	1.12542	0.151847	1.20388	1.20709	0.0356302	1.18769	0.942913	0.37613	1.16242	1.07247
ENSMUSP00000036188	ENSMUSG00000038538	Ubn2	Q80WC1 "Ubinuclein-2 "	0.1766	55	6				0.1834	55	1	0.960216	0.513648	1.16015				0.819945			1.0758	0.13669	1.11186				1.05628			1.08275	0.126832	1.12162				0.593566			1.10743	0.16814	1.17689				0.905669			1.02959
ENSMUSP00000004203	ENSMUSG00000004100	Ppan	Q91YU8 "Suppressor of SWI4 1 homolog (Ssf-1)(Peter Pan homolog)"	0.3128	32	6	0.2617	20	6	0.4936	48	5	1.00608	0.968887	1.46263	0.938388	0.0202212	1.04994	0.940715	0.173891	1.10816	0.934248	0.720662	1.5874	0.970729	0.281037	1.06526	0.821072	0.00595214	1.10806	1.20376	0.202357	1.38413	1.00847	0.652445	1.04633	0.880124	0.306197	1.35313	1.22312	0.194362	1.41287	1.0494	0.128129	1.07042	0.96049	0.520335	1.17232	1.18511
ENSMUSP00000038555	ENSMUSG00000040618	Pck2	Q8BH04 "Phosphoenolpyruvate carboxykinase [GTP], mitochondrial Precursor (PEPCK-M)(EC 4.1.1.32)(Phosphoenolpyruvate carboxylase)"	0.2429	35	5	0.1409	13	1				0.871416	0.5589	1.82218	0.881275						1.15947	0.12577	1.23712	1.18658						0.870923	0.477434	1.72149	0.819716						1.0759	0.304887	1.18854	0.907181						0.948679
ENSMUSP00000004554	ENSMUSG00000012848	Rps5	P97461 "40S ribosomal protein S5 [Contains 40S ribosomal protein S5, N-terminally processed]"	0.4755	15	4	0.5	24	5	0.6422	35	5	1.29356	0.0814595	1.37287	1.23653	0.0173702	1.16261	1.04288	0.00258545	1.01755	1.15656	0.663303	2.61652	1.03479	0.255838	1.07429	1.03155	0.201846	1.05816	1.27579	0.120445	1.43346	1.19752	0.0118389	1.12091	0.98755	0.967899	2.25298	1.34719	0.00796313	1.16155	1.1891	0.0431152	1.17878	1.07221	0.714466	1.63673	1.35413
ENSMUSP00000003527	ENSMUSG00000003435	Supt5h	O55201 "Transcription elongation factor SPT5 (DRB sensitivity-inducing factor large subunit)(DSIF large subunit)"	0.2181	52	6	0.1682	21	7	0.3678	60	6	0.963771	0.828472	1.51528	0.971402	0.458624	1.09381	1.13847	0.00905235	1.084	1.01906	0.898369	1.43532	1.01275	0.741203	1.09373	0.708731	0.371246	2.46322	0.979778	0.878855	1.38746	0.946512	0.192841	1.09606	0.798323	0.747435	5.48237	0.989444	0.882425	1.20556	0.96943	0.524966	1.11918	0.760182	0.560933	3.10361	1.01205
ENSMUSP00000077118	ENSMUSG00000025794	Rpl14	Q9CR57 "60S ribosomal protein L14 "	0.4516	20	7	0.3963	20	7	0.6267	30	6	1.08694	0.784442	2.04027	1.36998	0.0402158	1.34358	1.13052	0.0158935	1.09213	0.957089	0.875253	1.9254	1.40728	0.0252405	1.32621	1.12357	0.29075	1.28875	1.14024	0.420114	1.44938	1.30912	0.0306795	1.26415	1.31457	0.591749	3.41519	1.01659	0.920344	1.47139	1.32393	0.0690703	1.36423	1.44534	0.0585798	1.47397	1.06852
ENSMUSP00000039776	ENSMUSG00000038644	Pold1	P52431 "DNA polymerase delta catalytic subunit (EC 2.7.7.7)"	0.2507	71	6	0.124	24	5	0.2742	56	6	0.856881	0.0641361	1.1826	1.03446	0.856534	1.62895	0.875083	0.00440557	1.07225	0.922752	0.519707	1.34805	1.03689	0.655308	1.23222	1.37306	0.170206	1.66368	0.843341	0.0475774	1.18262	0.89732	0.402392	1.37909	0.838913	0.311111	1.49316	0.919963	0.401423	1.26365	1.13918	0.481361	1.59435	0.82664	0.0684812	1.23546	0.827287
ENSMUSP00000116542	ENSMUSG00000036246	Gmip	002 "Gem-interacting protein Gene [Source:MGI (curated);Acc:MGI:1926066]" "MGI_curated_transcript"	0.1771	35	5	0.07312	12	4	0.3337	51	2	0.549641	0.0316943	1.67011	0.539449	0.00671893	1.33929	0.65493	0.0531221	1.56795	0.908775	0.445746	1.36929	0.817567	0.0232722	1.1611	0.998965	0.990569	2.43015	0.808674	0.0777291	1.28387	0.892833	0.0824828	1.15067	0.918748	0.220909	1.47608	0.838955	0.167126	1.33532	0.713476	0.0307851	1.32113	0.799242	0.117512	1.70171	0.870107
ENSMUSP00000043691	ENSMUSG00000022360	Atad2	Q6IQY4;Q8K282;Q9CSS4 "Atad2 protein Fragment ";"ATPase family, AAA domain containing 2 ";"Putative uncharacterized protein Fragment "	0.1928	69	5	0.1474	29	5	0.3299	83	5	1.12709	0.604016	1.8054	1.25908	0.00382731	1.11201	1.10227	0.0108714	1.06199	1.25476	0.246833	1.59181	1.32431	0.0019176	1.11349	1.13461	0.0136494	1.08696	1.0559	0.572185	1.27859	1.06531	0.0494558	1.06504	0.977165	0.692375	1.16266	1.1204	0.0755003	1.14141	1.13906	0.0217134	1.10401	1.00939	0.825152	1.11632	1.16373
ENSMUSP00000003459	ENSMUSG00000020437	Myo1g	Q5SUA5 "Myosin-Ig "	0.2275	45	7	0.1846	22	9	0.334	60	5	0.616582	0.00260199	1.27061	0.855841	0.0758961	1.1926	0.564559	0.00115315	1.21085	0.528529	0.00730709	1.42128	0.708156	2.94267e-05	1.09877	0.788539	0.0144017	1.17279	0.422918	0.0221684	1.96671	0.726523	0.000523667	1.1412	0.836117	0.460852	1.83989	0.555082	0.000538143	1.23999	0.64512	5.05904e-06	1.09893	0.609193	0.0132989	1.38368	0.53421
ENSMUSP00000057270	ENSMUSG00000047710	Zfp828	Q8K327 "Zinc finger protein 828 "	0.1247	19	6	0.1608	17	4	0.2618	33	3	0.892387	0.51421	1.51771	1.04458	0.143295	1.07294	1.01898	0.303261	1.06067	0.975863	0.863256	1.4141	1.08699	0.0680922	1.09959	0.970401	0.409202	1.13297	0.938795	0.606808	1.34438	1.03647	0.129976	1.05655	0.797127	0.469344	3.01	0.91017	0.414619	1.31277	1.1095	0.0992974	1.15031	0.995685	0.960102	1.39034	0.82983
ENSMUSP00000027139	ENSMUSG00000025995	Wdr75	Q08EC1;Q3MIA1;Q3THS2;Q3TI30;Q3TQZ0;Q3U821;Q6IS38;Q7TMM0;Q9CRF5 "WD repeat domain 75WD repeat domain 75, isoform CRA_a ;";"Wdr75 protein Fragment ";"Putative uncharacterized protein ";"Putative uncharacterized protein ";"Putative uncharacterized protein Fragment ";"Putative uncharacterized proteinWD repeat domain 75 ;";"Wdr75 protein Fragment ";"Wdr75 protein Fragment ";"Putative uncharacterized p…	0.2108	47	6	0.1217	13	6	0.2518	40	4	1.06544	0.71184	1.51696	0.909546	0.595494	1.53761	0.994842	0.806252	1.06339	0.99205	0.943001	1.31394	1.06844	0.366123	1.18688	0.789694	0.00351075	1.09329	1.0128	0.908723	1.31156	0.99173	0.838943	1.10488	1.16069	0.0130434	1.09341	1.05668	0.470628	1.19924	0.932976	0.573465	1.34489	1.06045	0.316813	1.16866	1.08719
ENSMUSP00000029643	ENSMUSG00000028010	Gar1	Q9CY66 "H/ACA ribonucleoprotein complex subunit 1 (snoRNP protein GAR1)(Nucleolar protein family A member 1)"	0.6438	34	6	0.8182	33	6	0.8831	59	3	0.833891	0.126815	1.29078	0.712211	0.0351306	1.35578	0.892868	0.309721	1.43534	0.962981	0.751682	1.3365	1.00238	0.904546	1.04961	0.906191	0.0987359	1.15498	0.568385	0.0677964	1.86873	0.836537	0.0452474	1.18881	1.15184	0.12333	1.26622	1.05773	0.296679	1.13188	0.821262	0.0697573	1.2462	1.03215	0.603594	1.24981	1.04229
ENSMUSP00000110995	ENSMUSG00000022881	Rfc4	Q3UI84 "Putative uncharacterized protein "	0.3351	25	7	0.3242	19	10	0.6703	31	9	1.10938	0.046506	1.10678	0.949173	0.657859	1.29391	1.13099	0.00124457	1.06006	1.05897	0.629987	1.33282	1.00781	0.805744	1.07195	0.979545	0.158241	1.0311	0.932992	0.231056	1.13977	0.89831	0.133686	1.15854	1.24312	0.0529298	1.24747	0.919642	0.184944	1.15044	0.958692	0.776041	1.38471	0.979669	0.620812	1.09643	0.973949
ENSMUSP00000031590	ENSMUSG00000029594	Rbm19	Q8R3C6 "Probable RNA-binding protein 19 (RNA-binding motif protein 19)"	0.1754	37	5	0.1649	22	7	0.2164	42	2	1.06848	0.297152	1.16592	1.28366	0.0655947	1.3123	0.973996	0.592386	1.56736	1.05941	0.467829	1.2213	1.24085	0.00242045	1.11108	0.711384	0.0310937	1.23554	0.943674	0.709241	1.49454	1.15732	0.0501337	1.15746	0.788533	0.242684	3.35326	1.05432	0.5796	1.27622	1.24745	0.0173691	1.18087	0.784862	0.171679	2.34147	1.13949
ENSMUSP00000088174	ENSMUSG00000068798	Rap1a	P62835 "Ras-related protein Rap-1A Precursor (Ras-related protein Krev-1)"	0.4185	16	5				0.3913	11	4	1.85828	0.312935	4.44255				1.425	0.00443659	1.15611	0.963029	0.934185	3.28646				1.19716	0.00102129	1.04563	1.39832	0.28523	2.12783				2.47239	0.0256538	2.00654	1.32616	0.172434	1.60371				1.41129	0.0388949	1.36527	0.950829
ENSMUSP00000048096	ENSMUSG00000037851	Iars	Q8BU30 "Isoleucyl-tRNA synthetase, cytoplasmic (EC 6.1.1.5)(Isoleucine--tRNA ligase)(IleRS)(IRS)"	0.1933	62	6	0.1078	16	3				0.647186	0.142327	1.90197	1.23548	0.18591	1.58244				0.678535	0.152491	1.80613	0.939783	0.491025	1.37656				0.606972	0.0548075	1.67268	0.919687	0.370685	1.36969				0.611962	0.0491982	1.63008	1.05879	0.338667	1.21793				0.602886
ENSMUSP00000102277	ENSMUSG00000005610	Eif4g2	Q62448 "Eukaryotic translation initiation factor 4 gamma 2 (eIF-4-gamma 2)(eIF-4G 2)(eIF4G 2)(p97)(Novel APOBEC-1 target 1)(Translation repressor NAT1)"	0.3168	61	6	0.1475	24	2	0.223	45	1	1.0162	0.7107	1.11094	1.65273	0.427444	159.571	0.973006			0.982522	0.70861	1.12136	1.12255	0.509877	4.55029	1.20819			0.951493	0.0990234	1.06524	1.19291	0.635458	32.3522	0.776152			0.944532	0.316428	1.14094	1.43489	0.450406	50.5811	1.00325			1.00864
ENSMUSP00000019441	ENSMUSG00000019297	2610027L16Rik	Q8BMC4 "Pumilio domain-containing protein C14orf21 homolog "	0.184	27	5	0.1855	22	2	0.3978	40	6	0.956012	0.628717	1.26979	0.866641	0.579211	10.3663	0.877395	0.0148394	1.09667	1.12093	0.0975529	1.1585	1.24645	0.00171737	1.00758	0.984955	0.757688	1.12703	1.01868	0.619663	1.10035	1.03714	0.468217	1.52091	0.855174	0.575965	1.95964	1.07547	0.390924	1.23386	1.12221	0.315442	2.20736	0.894298	0.236056	1.23784	0.977367
ENSMUSP00000001339	ENSMUSG00000001305	Rrp15	Q9CYX7 "RRP15-like protein (Ribosomal RNA-processing protein 15)"	0.2954	19	6	0.2278	11	3	0.331	21	3	0.996307	0.962659	1.21327	0.950918	0.0826028	1.06868	1.00127	0.958626	1.09817	0.893022	0.131544	1.17527	0.93528	0.105374	1.10703	0.819165	0.00557516	1.06647	1.04164	0.599755	1.20605	1.02596	0.597404	1.19403	0.530736	0.127957	2.95	1.16465	0.214113	1.31713	1.12926	0.0563387	1.13849	1.27435	0.277035	2.02368	1.13543
ENSMUSP00000088906	ENSMUSG00000036893	Ehmt1	A2AIS4;Q3UF17;Q6ZPG6;Q8BHB2;Q8C358;Q8C3T0 "Euchromatic histone methyltransferase 1 ";"Putative uncharacterized protein Fragment ";"MKIAA1876 protein Fragment ";"Putative uncharacterized protein ";"Putative uncharacterized protein Fragment ";"Putative uncharacterized protein Fragment "	0.1606	45	5	0.1382	27	4	0.2147	47	4	1.09868	0.541274	1.47948	1.03578	0.557452	1.18529	0.991396	0.913543	1.26247	0.936239	0.61881	1.40445	0.989141	0.831557	1.16164	0.875545	0.119221	1.21593	1.02482	0.857182	1.42567	1.05195	0.430304	1.19395	0.776154	0.513745	2.97984	0.968008	0.708578	1.25209	0.977604	0.777867	1.26315	0.842057	0.490358	2.00956	0.993911
ENSMUSP00000021930	ENSMUSG00000021474	Sfxn1	Q99JR1 "Sideroflexin-1 "	0.3385	24	3	0.2795	11	3	0.4472	17	6	1.36158	0.0952684	1.8063	1.33312	0.0883262	1.48337	0.948172	0.0264411	1.04492	1.33341	0.0388512	1.25031	1.21142	0.0035016	1.05018	1.04726	0.111636	1.06348	0.855869	0.726628	75.0844	1.40654	0.247989	2.48381	1.10908	0.403234	1.3386	1.32382	0.0755939	1.52996	1.3441	0.0703205	1.42836	1.18856	0.000861671	1.0646	1.26665
ENSMUSP00000111807	ENSMUSG00000056772	AC131029.2	AC131029.2 AC131029.2-201 "null" "Clone_based_ensembl_transcript"	0.3173	19	4							1.22473	0.598082	2.99736							1.00729	0.983872	2.86651							1.29557	0.474028	2.74334							1.13039	0.757419	3.16687							1.25258
ENSMUSP00000025109	ENSMUSG00000024260	Sap130	Q8BIH0 "Histone deacetylase complex subunit SAP130 (130 kDa Sin3-associated polypeptide)(Sin3-associated polypeptide p130)"	0.158	35	6	0.1381	21	4	0.2289	38	3	0.965455	0.736987	1.28984	1.07787	0.71209	1.80033	0.727268	0.177917	1.95639	1.10103	0.156399	1.16003	1.21311	0.364108	1.77884	0.999762	0.998157	1.48242	0.981709	0.899088	1.42733	0.937782	0.358508	1.20796	0.59398	0.276383	4.53474	0.907532	0.482437	1.3895	1.01219	0.949511	1.75195	0.785412	0.409039	2.72714	0.940876
ENSMUSP00000101927	ENSMUSG00000030677	Kif22	Q3V300 "Kinesin-like protein KIF22 "	0.3152	54	7	0.1712	18	5	0.3636	44	6	0.70616	0.0659935	1.46142	0.966901	0.748846	1.3131	0.841586	0.00658567	1.10431	0.720374	0.209464	1.77004	1.09301	0.184666	1.16675	0.858599	0.0042304	1.08215	0.643784	0.124229	1.8279	0.917829	0.446331	1.32594	0.883812	0.797767	3.23815	0.571123	0.0518568	1.76188	0.938789	0.429234	1.22088	0.824266	0.463976	1.87189	0.693122
ENSMUSP00000111284	ENSMUSG00000031167	Rbm3	O89086 "Putative RNA-binding protein 3 (RNA-binding motif protein 3)"	0.5948	19	3	0.5294	22	4	0.9281	45	6	1.10934	0.811789	5.1942	0.92243	0.782247	2.34016	0.876118	0.000677174	1.04655	1.40484	0.443289	4.68006	1.09711	0.320058	1.28155	0.994637	0.91989	1.13967	1.26457	0.561769	4.32724	1.06175	0.670754	1.50098	1.03806	0.964162	7.64195	1.29299	0.551061	4.74048	1.14962	0.599097	2.13237	0.837339	0.588426	2.20315	1.47432
ENSMUSP00000058741	ENSMUSG00000046691	Chtf8	Q8BHM2 "Protein DERPC "	0.3508	23	5							1.30546	0.0474469	1.29909							1.12863	0.110352	1.17855							1.21287	0.1094	1.29828							1.08005	0.280049	1.18681							0.981631
ENSMUSP00000045873	ENSMUSG00000036777	Anln	Q8K298 "Actin-binding protein anillin "	0.1695	34	5	0.1213	16	6	0.2587	57	2	0.74043	0.0416273	1.32579	0.707345	0.000788044	1.13096	0.604567	0.140588	4.20167	1.04041	0.636957	1.24066	0.977812	0.0669927	1.02504	0.803405	0.061356	1.30851	0.833785	0.106342	1.27496	0.82783	0.0016341	1.08198	0.914787	0.858016	146.88	0.907008	0.46112	1.39472	0.970458	0.601868	1.1486	0.826721	0.390361	5.48109	1.3401
ENSMUSP00000078685	ENSMUSG00000059878	Zfp422	Q9ERU3 "Zinc finger protein 22 (Zinc finger protein 422)(Zinc finger protein Krox-25)(Zinc finger protein Krox-26)"	0.3544	17	4	0.2321	7	1	0.3376	20	3	1.09473	0.736837	2.18393	0.865877			0.870457	0.0190009	1.08707	1.38724	0.407635	2.95732	1.04531			1.01093	0.564697	1.07079	1.04211	0.922502	3.46246	0.802292			0.559916	0.393524	10.1098	1.06709	0.851195	2.74923	0.839053			0.698562	0.24421	2.57455	1.07035
ENSMUSP00000100728	ENSMUSG00000078305	CT025701.1	CT025701.1 CT025701.1-201 "null" "Clone_based_ensembl_transcript"	0.4429	32	5	0.1607	11	1	0.4286	24	4	1.12719	0.269408	1.29622	1.34573			1.12271	0.0851252	1.15643	0.902187	0.489615	1.45646	1.01438			0.906866	0.0929781	1.13632	1.00186	0.989044	1.42401	1.10165			0.860005	0.541609	2.0115	1.00347	0.976291	1.35603	1.22986			0.994586	0.958414	1.35678	1.11235
ENSMUSP00000027384	ENSMUSG00000026192	Atic	Q9CWJ9 "Bifunctional purine biosynthesis protein PURH [Includes Phosphoribosylaminoimidazolecarboxamide formyltransferase(EC 2.1.2.3)(5-aminoimidazole-4-carboxamide ribonucleotide formyltransferase)(AICAR transformylase);IMP cyclohydrolase(EC 3.5.4.10)(Inos /.../e)(IMP synthetase)(ATIC)]"	0.2449	31	6	0.2128	16	7	0.5118	45	10	1.09129	0.273867	1.20058	1.52392	0.000146004	1.12909	1.27973	0.000139942	1.0925	0.927741	0.22909	1.15118	0.736511	1.25295e-05	1.05906	1.05604	0.113338	1.07286	0.985217	0.855091	1.22035	0.938596	0.537503	1.26769	0.863657	0.316999	1.36746	1.10729	0.239362	1.21683	1.44023	5.11276e-05	1.09126	1.08162	0.360746	1.20239	0.816686
ENSMUSP00000103163	ENSMUSG00000003119	Cdk12	Q3TNY6;Q9CVL4 "Putative uncharacterized protein Fragment ";"Putative uncharacterized protein Fragment "	0.1864	58	3							0.981664	0.863658	1.50551							0.865857	0.228815	1.43588							1.18674	0.212247	1.50283							0.958439	0.736918	3.42132							1.12597
ENSMUSP00000090761	ENSMUSG00000017478	Zc3h18	Q0P678 "Zinc finger CCCH domain-containing protein 18 (Nuclear protein NHN1)"	0.2068	38	7	0.2141	24	3	0.4012	64	4	0.903838	0.267313	1.24354	1.10412	0.610232	2.03823	0.871528	0.188923	1.2948	0.969281	0.543734	1.13961	1.27173	0.511808	3.69695	1.0014	0.955351	1.07586	1.19366	0.0023973	1.07455	0.984017	0.861395	1.41945	1.13335	0.520859	1.73217	0.929418	0.59422	1.42123	1.08306	0.708286	2.2168	0.950621	0.45136	1.20515	1.0498
ENSMUSP00000022345	ENSMUSG00000021811	Dnajc9	Q91WN1 "DnaJ homolog subfamily C member 9 "	0.4595	30	5	0.444	15	9	0.6255	31	6	0.939725	0.858597	2.48069	1.02366	0.901953	1.52818	0.834497	0.000805726	1.05669	1.12343	0.72827	2.37939	1.10924	0.00048212	1.04323	0.997642	0.939161	1.08403	0.7313	0.423463	2.6522	0.781614	0.00275887	1.14266	1.11105	0.624434	1.68101	0.960054	0.929237	3.31075	1.12473	0.548529	1.54148	0.978093	0.864013	1.37149	0.881364
ENSMUSP00000114839	ENSMUSG00000079426	Arpc4	Q3TX55;Q7TPD9;Q8BVW6;Q9D3C4 "Putative uncharacterized protein ";"Arpc4 protein ";"Putative uncharacterized protein ";"Putative uncharacterized protein "	0.5655	27	5	0.5	18	8	0.8274	30	7	1.03385	0.765901	1.33634	1.1132	0.0152855	1.08276	0.991137	0.721458	1.06002	0.841102	0.0948244	1.24661	0.568706	8.86967e-06	1.12401	0.946743	0.409573	1.16311	0.669642	0.00179721	1.16282	0.860543	0.00511314	1.09258	1.42177	0.265258	2.01566	0.943005	0.464328	1.22334	1.06854	0.108043	1.08885	1.30378	0.249804	1.66451	0.723989
ENSMUSP00000118911	ENSMUSG00000022201	Zfr	B2RUG7 "Zinc finger RNA binding protein "	0.2868	70	6	0.1965	30	8	0.3994	75	8	0.771494	0.147135	1.4756	0.981507	0.84447	1.24214	0.987421	0.634048	1.06202	0.844633	0.394976	1.59474	1.01222	0.864388	1.17597	0.995359	0.88634	1.07704	0.795069	0.0849414	1.31662	0.995049	0.912871	1.10902	0.790577	0.454977	2.01923	0.934928	0.639995	1.41592	1.01926	0.753247	1.14792	0.936607	0.634312	1.36553	0.84945
ENSMUSP00000099561	ENSMUSG00000028741	Mrto4	Q9D0I8 "mRNA turnover protein 4 homolog "	0.4184	21	7	0.4142	16	8	0.4686	23	6	1.0939	0.107785	1.12329	1.04664	0.529029	1.17679	1.10985	0.0149862	1.07651	1.00632	0.910803	1.14092	1.02815	0.381208	1.07278	0.856033	0.0169471	1.12029	1.03955	0.588224	1.18058	0.988833	0.755053	1.08529	1.24325	0.0379222	1.22117	1.14718	0.07512	1.16916	1.15875	0.0506701	1.15944	1.1454	0.0151833	1.10115	1.214
ENSMUSP00000030872	ENSMUSG00000029012	Orc5l	Q9WUV0 "Origin recognition complex subunit 5 "	0.2713	31	6	0.1931	10	4	0.2713	25	3	1.04838	0.681495	1.32184	1.02615	0.698214	1.21211	1.26975	0.0803873	1.36397	0.945397	0.683739	1.39679	0.993841	0.927833	1.22118	1.02597	0.631379	1.21736	0.943994	0.605468	1.30868	1.11231	0.210987	1.23811	0.695339	0.359915	3.76986	0.968562	0.79559	1.35061	0.964746	0.430995	1.13409	0.971712	0.877143	2.02442	1.09754
ENSMUSP00000087106	ENSMUSG00000022811	Zfp148	Q61624 "Zinc finger protein 148 (Zinc finger DNA-binding protein 89)(Transcription factor ZBP-89)(G-rich box-binding protein)(Beta enolase repressor factor 1)(Transcription factor BFCOL1)"	0.2141	39	5	0.1486	19	4	0.1725	27	3	0.924511	0.49309	1.33533	1.06708	0.636635	1.48345	0.968126	0.733721	1.42873	1.08543	0.284403	1.20234	1.1517	0.0520453	1.15438	1.0559	0.00810026	1.02142	0.95786	0.817316	1.72225	1.05806	0.538385	1.29601	0.695508	0.554056	9.18462	1.09726	0.0085694	1.04903	1.13298	0.196857	1.27163	0.8986	0.631014	2.26921	1.04496
ENSMUSP00000078682	ENSMUSG00000037373	Ctbp1	O88712 "C-terminal-binding protein 1 (CtBP1)(EC 1.1.1.-)"	0.195	22	3	0.1633	9	1	0.3401	29	3	1.00597	0.909601	1.22083	0.826456			0.958386	0.413201	1.19538	0.901025	0.486705	1.69928	0.978845			1.18394	0.0884741	1.26084	1.09086	0.108071	1.14356	1.0145			1.24222	0.366402	2.23859	0.925221	0.177421	1.1776	0.829096			1.13547	0.335879	1.5452	0.942878
ENSMUSP00000032114	ENSMUSG00000030036	Mogs	Q80UM7 "Mannosyl-oligosaccharide glucosidase (EC 3.2.1.106)(Glycoprotein-processing glucosidase I)(Glucosidase 1)"	0.1871	29	5	0.1163	13	3	0.2626	34	6	0.863112	0.137571	1.2468	0.989766	0.955611	2.02265	0.893332	0.0598776	1.12713	1.06061	0.447224	1.21414	1.11242	0.048299	1.11024	1.14412	0.0313902	1.1239	1.04662	0.465991	1.17015	0.950788	0.0913821	1.07313	0.836256	0.30531	1.49587	1.04822	0.302461	1.1169	1.03978	0.6916	1.44214	1.12347	0.2588	1.26494	0.937265
ENSMUSP00000058432	ENSMUSG00000039001	Rps21	Q9CQR2 "40S ribosomal protein S21 "	0.7952	15	3	0.7952	13	5	0.7711	17	2	1.16904	0.467233	2.1273	1.13037	0.44929	1.50089	1.05891	0.245481	1.34344	1.09431	0.625986	1.97378	1.06967	0.250246	1.14929	1.10057	0.179349	1.42248	1.11409	0.796928	4.87962	1.24237	0.251903	1.56874	1.45414	0.295523	10.8265	1.36073	0.11693	1.64544	1.1982	0.216306	1.40803	1.52572	0.259949	10.1998	1.26813
ENSMUSP00000001178	ENSMUSG00000001150	Mcm3ap	Q9WUU9 "80 kDa MCM3-associated protein (Protein GANP)"	0.1339	65	6	0.1182	33	4	0.1563	65	2	1.08139	0.0741162	1.09345	1.00054	0.991729	1.16574	1.1344	0.432969	3.65458	0.977066	0.663625	1.13788	0.953804	0.263642	1.11593	0.944442	0.137684	1.17301	0.993679	0.949883	1.27988	1.02238	0.941001	2.40175	0.823349	0.354112	4.64357	1.01976	0.671248	1.11818	0.925745	0.48115	1.3581	0.896594	0.588889	6.29941	0.979128
ENSMUSP00000039493	ENSMUSG00000040459	Arglu1	Q3UL36 "Arginine and glutamate-rich protein 1 "	0.4576	35	5	0.3542	19	5				0.920364	0.0388442	1.07904	1.00236	0.922164	1.06505				1.0004	0.990978	1.09672	1.03736	0.320497	1.09403				0.983331	0.862736	1.28811	0.998781	0.987549	1.22617				1.00832	0.806436	1.0919	1.03347	0.263571	1.07285				1.01452
ENSMUSP00000025444	ENSMUSG00000024560	Cxxc1	Q9CWW7 "CpG-binding protein (PHD finger and CXXC domain-containing protein 1)(CXXC-type zinc finger protein 1)"	0.15	25	5	0.1015	9	6	0.2758	42	3	0.874314	0.441615	1.54806	0.912915	0.62339	1.56518	0.997867	0.962746	1.19038	0.845184	0.398557	1.63976	1.04207	0.787451	1.4512	0.964329	0.605901	1.294	0.719765	0.401874	2.64947	0.880044	0.643207	1.94843	1.00404	0.979905	1.84227	0.859782	0.424889	1.60397	0.954375	0.700006	1.34194	1.13737	0.383408	1.64885	0.82153
ENSMUSP00000058368	ENSMUSG00000045128	Rpl18a	P62717 "60S ribosomal protein L18a "	0.5568	30	6	0.4545	13	6	0.8352	34	9	1.06907	0.712501	1.55289	1.26263	0.289015	1.65807	1.10917	0.00160188	1.05249	1.00603	0.976305	1.64056	0.997142	0.956097	1.13561	0.982283	0.448179	1.05305	1.11239	0.635616	1.72157	0.969059	0.879649	1.6606	1.05072	0.897213	2.35282	1.06851	0.551333	1.30589	1.17653	0.0983192	1.22883	1.47297	0.134847	1.71081	1.03486
ENSMUSP00000000590	ENSMUSG00000032050	Rdx	P26043 "Radixin (ESP10)"	0.4117	76	5	0.2521	32	4	0.5849	81	6	0.938208	0.747245	1.66986	0.925075	0.199833	1.16328	0.931484	0.0902621	1.09098	0.940518	0.788151	1.80857	0.852593	0.0132383	1.10085	0.986505	0.675424	1.08181	1.0697	0.763797	1.78856	0.977363	0.21027	1.04692	0.915579	0.402888	1.28176	1.24813	0.393068	1.90292	1.11347	0.0717244	1.13327	1.00044	0.994692	1.17531	1.15985
ENSMUSP00000045284	ENSMUSG00000038462	Uqcrfs1	Q9CR68 "Cytochrome b-c1 complex subunit Rieske, mitochondrial Precursor (EC 1.10.2.2)(Ubiquinol-cytochrome c reductase iron-sulfur subunit)(Rieske iron-sulfur protein)(RISP)(Cytochrome b-c1 complex subunit 5)(Complex III subunit 5) [Contains Cytochrome b-c1 /.../ex subunit 11(Ubiquinol-cytochrome c reductase 8 kDa protein)(Complex III subunit IX)]"	0.3577	16	6	0.2153	7	3	0.4854	19	3	1.61422	0.00647383	1.31567	1.36361	0.109144	1.61802	0.906941	0.0833862	1.1384	1.33688	0.00870373	1.19581	1.37847	0.00785546	1.13104	1.61434	0.240142	3.47887	2.33624	0.000988924	1.37278	1.7912	0.0016751	1.10825	0.910898	0.772834	3.37809	1.65718	0.000232441	1.14853	1.30033	0.0980796	1.46616	1.44396	0.0321975	1.33741	1.95921
ENSMUSP00000028382	ENSMUSG00000026999	Nup35	Q8R4R6 "Nucleoporin NUP53 (Nuclear pore complex protein Nup53)(Nucleoporin Nup35)(35 kDa nucleoporin)(Mitotic phosphoprotein 44)(MP-44)"	0.3754	16	6	0.3754	13	6	0.7754	36	11	0.969105	0.625037	1.16773	0.945686	0.730774	1.48362	0.910346	0.000174958	1.0368	0.891603	0.156547	1.19368	0.940132	0.571405	1.29981	0.902522	0.0619665	1.11489	0.963167	0.66657	1.23484	0.941565	0.308122	1.14623	0.838747	0.492807	1.73385	1.00587	0.932023	1.1827	0.968982	0.843941	1.47811	0.797864	0.160666	1.39381	1.14479
ENSMUSP00000057308	ENSMUSG00000051627	Hist1h1e	P43274 "Histone H1.4 (H1 VAR.2)(H1e)"	0.4932	52	3	0.7169	72	4	0.7945	67	4	1.4292	0.404299	4.32791	1.16548	0.908622	49.7167	1.1834	0.0693599	1.21311	1.23869	0.642326	5.47654	0.950007	0.803926	1.82587	0.82587	0.105523	1.30385	1.11405	0.820288	6.04253	0.840485	0.567186	2.36975	1.04511	0.900012	2.79516	1.26108	0.678738	8.0085	0.999943	1	35.4104	0.762244	0.55489	3.68242	1.44307
ENSMUSP00000034457	ENSMUSG00000031976	Urb2	B9EKU4;Q80U74 "URB2 ribosome biogenesis 2 homolog (S. cerevisiae) ";"MKIAA0133 protein Fragment "	0.1654	63	7	0.09449	17	9	0.3117	95	11	0.94044	0.5188	1.2452	1.05689	0.529054	1.21402	1.08469	0.00560593	1.05291	0.982166	0.828957	1.21547	1.06614	0.0295133	1.05743	0.893114	0.000571738	1.05211	0.969045	0.711631	1.21954	1.01135	0.794222	1.10129	1.10635	0.568625	1.46523	0.945824	0.464523	1.19068	0.981506	0.819817	1.20066	1.0278	0.758108	1.2129	0.90193
ENSMUSP00000079380	ENSMUSG00000001847	Rac1	P63001 "Ras-related C3 botulinum toxin substrate 1 Precursor (p21-Rac1)"	0.3318	8	2	0.4739	13	7	0.3318	15	3	1.10207	0.135442	1.30575	2.05417	0.0887921	2.3826	1.21436	0.0248923	1.14382	0.8845	0.387125	2.96094	0.998995	0.995006	1.45946	1.24959	0.00616206	1.07855	0.804238	0.374239	6.32702	1.10252	0.639962	1.62425	1.02836	0.960104	8.42325	0.986675	0.585229	1.25045	1.29139	0.43534	2.1144	0.874392	0.345039	1.60192	0.974657
ENSMUSP00000035079	ENSMUSG00000032498	Mlh1	Q9JK91 "DNA mismatch repair protein Mlh1 (MutL protein homolog 1)"	0.2474	34	4	0.07895	11	2	0.2092	29	2	0.910865	0.454827	1.41477	0.871423	0.520432	6.45404	0.973737	0.662623	1.78106	0.911173	0.318946	1.28186	0.652066	0.032392	1.31875	0.985664	0.623884	1.31462	0.799	0.26453	1.68475	0.679593	0.0725485	1.75369	1.0192	0.956286	33.5538	0.916244	0.230203	1.20365	0.841956	0.116591	1.49907	1.01637	0.945521	11.0826	0.813047
ENSMUSP00000112772	ENSMUSG00000031314	Taf1	001 "TAF1 RNA polymerase II, TATA box binding protein (TBP)-associated factor Gene [Source:MGI (curated);Acc:MGI:1336878]" "MGI_curated_transcript"	0.1824	76	6	0.05882	18	2	0.2397	80	2	0.83234	0.282869	1.48029	0.824317	0.158073	1.86334	1.04253	0.385848	1.44313	0.827855	0.327657	1.56498	0.970297	0.0598451	1.03678	1.02978	0.841799	4.34782	0.808508	0.491662	2.08947	0.771353	0.653965	234.829	1.10927	0.85513	295.919	0.767096	0.22099	1.62847	0.875801	0.164748	1.56214	1.08599	0.735296	10.7373	0.869318
ENSMUSP00000035400	ENSMUSG00000022488	Nckap1l	Q3UDY0;Q8BVQ3;Q8K1X4 "Putative uncharacterized protein Fragment ";"Putative uncharacterized protein ";"Putative uncharacterized proteinNCK associated protein 1 like ;"	0.2116	70	6	0.09788	15	3	0.276	56	2	0.891945	0.610971	1.71986	0.758497	0.0820085	1.43815	1.06519	0.144356	1.20338	1.00125	0.995897	1.81009	0.907444	0.0610136	1.11432	0.998634	0.740442	1.04104	1.07557	0.758876	1.78183	1.02635	0.38662	1.10725	1.05374	0.702698	3.73977	0.852235	0.568768	1.96278	0.749055	0.000572244	1.0302	0.923311	0.466139	2.48757	1.02013
ENSMUSP00000066384	ENSMUSG00000022641	Bbx	Q8VBW5 "HMG box transcription factor BBX (Bobby sox homolog)(HMG box-containing protein 2)"	0.1896	34	5	0.05308	8	1				1.05241	0.419217	1.17076	0.72086						1.08945	0.000723463	1.02571	0.690005						0.94867	0.697642	1.4194	0.707531						1.00687	0.894353	1.14383	0.655662						0.900936
ENSMUSP00000121005	ENSMUSG00000029328	Hnrpdl	NP_057899.2 "heterogeneous nuclear ribonucleoprotein D-like "	0.3143	29	5	0.4643	35	6	0.6238	66	8	0.810324	0.123817	1.35032	0.881233	0.233809	1.27141	0.851927	0.000342164	1.06028	0.886775	0.468038	1.51661	1.071	0.142624	1.10677	1.00181	0.97809	1.16249	0.876775	0.746711	2.87139	1.00962	0.76474	1.08096	0.898899	0.552727	1.49824	0.960214	0.831497	1.64266	1.04918	0.602841	1.24909	0.931661	0.330319	1.17356	0.861479
ENSMUSP00000031402	ENSMUSG00000029447	Cct6a	P80317 "T-complex protein 1 subunit zeta (TCP-1-zeta)(CCT-zeta-1)"	0.2556	35	3	0.3365	25	11	0.4568	47	8	0.894922	0.134714	1.21615	1.05575	0.63626	1.28126	1.12092	0.004819	1.06878	1.05928	0.689886	1.71123	0.857909	0.00546297	1.10162	1.0873	0.39449	1.24386	0.946816	0.7628	1.97589	0.988394	0.809029	1.11049	1.04365	0.806866	1.48873	1.19875	0.223979	1.56564	1.28823	0.0280846	1.24596	1.13351	0.157106	1.20569	0.960889
ENSMUSP00000045043	ENSMUSG00000039756	Dnttip2	Q8R2M2 "Deoxynucleotidyltransferase terminal-interacting protein 2 "	0.2018	33	5	0.2282	33	8	0.4195	48	6	0.920156	0.0475529	1.08518	0.972572	0.317545	1.06303	1.01286	0.53272	1.05027	0.977989	0.703272	1.16293	0.995579	0.8213	1.04569	0.803925	0.00563066	1.12854	0.976629	0.570403	1.1122	1.01295	0.589224	1.05524	1.07919	0.561024	1.37007	1.0814	0.107467	1.11077	1.02493	0.354793	1.06054	1.05078	0.491797	1.1874	1.04995
ENSMUSP00000023352	ENSMUSG00000022672	Prkdc	P97313 "DNA-dependent protein kinase catalytic subunit (DNA-PK catalytic subunit)(DNA-PKcs)(EC 2.7.11.1)(p460)"	0.1742	202	4	0.1013	68	7	0.202	163	4	0.892275	0.259967	1.29926	0.808371	0.0625227	1.25608	0.961145	0.633051	1.26882	0.880225	0.259224	1.3397	0.836893	0.0223412	1.15324	0.946893	0.5533	1.29809	0.914523	0.289316	1.24786	0.83931	0.0322051	1.16703	0.877785	0.40974	1.54346	0.949699	0.710624	1.49553	0.695064	0.00196711	1.18573	0.861075	0.296293	1.45831	0.847489
ENSMUSP00000022322	ENSMUSG00000021794	Glud1	P26443 "Glutamate dehydrogenase 1, mitochondrial Precursor (GDH 1)(EC 1.4.1.3)"	0.2581	25	4	0.2097	14	3	0.4462	31	2	0.605836	0.0491173	1.64451	0.779088	0.0211097	1.17186	0.67928	0.376825	27.2116	0.96411	0.230393	1.08058	0.857845	0.126306	1.29663	1.01489	0.735561	1.53066	0.614231	0.178996	2.4298	0.86606	0.614304	2.84807	0.746911	0.439071	21.2892	0.886952	0.221758	1.2818	1.147	0.0498723	1.1468	0.859963	0.359308	3.36554	0.878244
ENSMUSP00000065198	ENSMUSG00000053289	Ddx10	Q80Y44 "Probable ATP-dependent RNA helicase DDX10 (EC 3.6.1.-)(DEAD box protein 10)"	0.256	51	5	0.1463	18	3	0.2789	50	2	1.13926	0.194449	1.26168	1.15842	0.518668	2.25878	0.891702	0.459683	3.60639	0.967561	0.786206	1.37113	1.08789	0.24925	1.25298	0.788311	0.114666	1.73382	1.04141	0.204397	1.07719	1.17028	0.13059	1.31246	1.18217	0.0831607	1.32228	1.08017	0.389938	1.24885	1.29788	0.181216	1.74411	1.09494	0.189854	1.42508	1.15466
ENSMUSP00000046540	ENSMUSG00000034826	Nup54	Q8BTS4 "Nuclear pore complex protein Nup54 (Nucleoporin Nup54)(54 kDa nucleoporin)"	0.2275	31	4	0.2608	20	9	0.3392	29	5	1.0919	0.497155	1.43783	0.87895	0.506387	1.5338	0.966434	0.489515	1.13279	1.01679	0.670395	1.11932	0.990537	0.725999	1.06226	0.926783	0.247386	1.16879	1.04245	0.708128	1.37881	0.971725	0.440577	1.08492	0.994751	0.996039	15.8164	0.988227	0.762063	1.12038	0.838869	0.274212	1.41221	0.890902	0.752041	2.57927	1.01979
ENSMUSP00000084599	ENSMUSG00000024795	Kif20b	Q80WE4 "Kinesin-like protein KIF20B (M-phase phosphoprotein 1)(MPP1)(Kinesin-related motor interacting with PIN1)(Kinesin family member 20B)"	0.2086	100	6	0.1347	42	9	0.3382	91	3	1.16129	0.761963	3.32581	0.6733	0.000497032	1.17614	0.929865	0.456258	1.40705	1.03768	0.890953	1.93356	0.808774	0.000848208	1.09919	0.786727	0.0205677	1.16225	1.18784	0.679728	2.74739	0.907366	0.0252862	1.08512	1.15761	0.523899	2.27631	0.96314	0.920444	2.50788	0.669596	2.11943e-06	1.08	0.802233	0.219978	1.71236	1.09199
[truncated: 2,905 more rows]
[truncated: 26 more columns]
